# Supplementary material
Source: publisher site journal article supplement (https://www.spandidos-publications.com/3367/downloadSupplementary)
Supplement: Supplementary file 1 [file downloadSupplementary]

## Sheet: List of DE lncRNA
# Fold-Change cut-off: 2.0 # P-value cut-off: 0.05 Note: The general filtering criteria of differentially expressed genes is P≤0.05 and Fold Change>2. The value of FC (abs) is positive correlated with the differences between two samples. Smaller P-value means higher reliability of the differentially expressed genes. The significant differentially expressed lncRNAs are listed with red (up-regulati…
BCC vs. Normal (Microarray analysis of lncRNAs)
ProbeName	p (Corr)	p	FC (abs)	Regulation	N-1	N-2	N-3	BCC-1	BCC-2	BCC-3	Type	Probe Sequence	lncRNA ID	Chromosome	Strand	Start	End	exoncount	exonstart	exonend	gene	description	alias	known lncRNA name	class	database	length
p39139_v4	0.346721	0.0175185	3.63418	up	2.61536	3.02396	3.44049	5.57736	4.1479	4.93944	0	TAGGACCTGAATGTAGATCTCAGTCATGTTCCTTACTAACAGCACGTTTTGCAACCATGC	ENST00000609178.1	22	-	50980733	50981335	1	50980733,	50981335,	ENSG00000272666.1	gene_id "ENSG00000272666.1"; transcript_id "ENST00000609178.1"; gene_type "lincRNA"; gene_status "NOVEL"; gene_name "CTA-384D8.35"; transcript_type "lincRNA"; transcript_status "KNOWN"; transcript_name "CTA-384D8.35-001"; level 2; tag "basic"; havana_gene "OTTHUMG00000186141.1"; havana_transcript "OTTHUMT00000472315.1";			Intergenic	ENSEMBL	602
p38217_v4	0.35077	0.0392928	2.08213	up	5.13296	4.6604	4.587	6.18122	6.13357	5.23975	0	AAGGTGCTGCAGAATGATAATGCTTTCCCCAAAATCTGAAACTGATTTGTATCATTGAAG	ENST00000607259.1	9	+	130129048	130129676	1	130129048,	130129676,	ENSG00000271833.1	gene_id "ENSG00000271833.1"; transcript_id "ENST00000607259.1"; gene_type "sense_intronic"; gene_status "NOVEL"; gene_name "RP11-356B19.11"; transcript_type "sense_intronic"; transcript_status "KNOWN"; transcript_name "RP11-356B19.11-001"; level 2; tag "basic"; havana_gene "OTTHUMG00000185720.1"; havana_transcript "OTTHUMT00000471071.1";			Sense	ENSEMBL	628
p43792_v4	0.34911	0.0296762	2.22723	up	4.44276	3.98439	4.13614	5.3166	5.9135	4.79893	0	AAGTTTACCACCAACTGGTGGGAATACATGCAACACATGCATAAAACAGAGCATCAGTGG	NR_109961.1	21	-	34484009	34496006	3	34484009,34486691,34495917,	34485035,34486929,34496006,	none					RefSeq	1353
p15514	0.353752	0.0472138	2.48925	up	2.37928	3.40307	3.84489	4.68257	4.19434	4.69748	0	CCTCAGATCCATAACATGCAGACCCATGGGATACATTATAATTTCATTCTCAGTCTGGTT	ENST00000475488.1	7	+	149483307	149496170	22	149483307,149484754,149484949,149485408,149485654,149485839,149486252,149486688,149487370,149488106,149488389,149488904,149489153,149489386,149489666,149490397,149490653,149491881,149492298,149492626,149493683,149494359,	149484653,149484882,149485059,149485558,149485748,149486009,149486486,149486910,149487708,149488290,149488794,149489057,149489294,149489569,149489817,149490551,149490708,149491986,149492517,149493603,149493834,149496170,	ENSG00000197558.7	gene_id "ENSG00000197558.7"; transcript_id "ENST00000475488.1"; gene_type "processed_transcript"; gene_status "KNOWN"; gene_name "SSPO"; transcript_type "retained_intron"; transcript_status "KNOWN"; transcript_name "SSPO-007"; level 2; havana_gene "OTTHUMG00000157884.3"; havana_transcript "OTTHUMT00000350044.1";	ENST00000475488.1	SSPO	Antisense	ENSEMBL	7481
p39039_v4	0.346721	0.0106858	3.70252	up	3.26532	3.48499	3.33053	6.07282	4.88661	4.78694	0	CCTGTTTCACTGAGAGCGACACTTACCTCAATAGTTAGTTCAATATTGTGTGTTGGATAA	ENST00000608960.1	22	+	18036249	18037847	1	18036249,	18037847,	ENSG00000272675.1	gene_id "ENSG00000272675.1"; transcript_id "ENST00000608960.1"; gene_type "lincRNA"; gene_status "NOVEL"; gene_name "AC004019.18"; transcript_type "lincRNA"; transcript_status "KNOWN"; transcript_name "AC004019.18-001"; level 2; tag "basic"; havana_gene "OTTHUMG00000185891.1"; havana_transcript "OTTHUMT00000471653.1";			Intergenic	ENSEMBL	1598
p10932	0.346721	0.0127927	2.56639	up	5.81158	5.50621	5.76956	7.30503	7.4082	6.45334	0	TAGTTATTTTAATTCCTGGCCCCTCTTTCCCTAAATCCAATTGTTAGCAAAGACTCCCCT	ENST00000444966.1	21	+	47666803	47667596	2	47666803,47667548,	47667145,47667596,	ENSG00000228137.1	gene_id "ENSG00000228137.1"; transcript_id "ENST00000444966.1"; gene_type "antisense"; gene_status "NOVEL"; gene_name "AP001469.7"; transcript_type "antisense"; transcript_status "KNOWN"; transcript_name "AP001469.7-001"; level 1; tag "basic"; tag "exp_conf"; havana_gene "OTTHUMG00000090628.1"; havana_transcript "OTTHUMT00000207252.1";	ENST00000444966.1	AP001469.7	Antisense	ENSEMBL	390
p30026	0.349965	0.0341795	2.74115	up	3.3439	4.21913	4.37651	5.58647	5.91456	4.80285	0	TAAAACATTGCTAGGGAAACGCTCTGACATCTTCCGTAGAGGTGAAAAAGCACAGGTCTG	TCONS_00016232	9	+	139541826	139547858	3	139541826,139543149,139547847,	139541996,139543531,139547858,	XLOC_007615	Gene_id=XLOC_007615;Gene_name=linc-EGFL7-1;Transcript_id=TCONS_00016232;Transcript_name=linc-EGFL7-1;	XLOC_007615		Intergenic	HumanLincRNACatalog	563
RNA147055|p0159_imsncRNA249	0.354588	0.0484251	4.84046	up	2.12236	3.80925	1.4215	4.33962	5.51216	4.32676	0	TCAGATGTGGTTTTAAATTTAGATTATGTATTCCTTTTGAAACATAAGAAAAACATTTAA	RNA147055|p0159_imsncRNA249													unpublished data	NA
p19724	0.348944	0.0280654	2.0233	up	7.53528	8.16772	8.51902	9.10038	8.92903	9.24274	0	GTCTGCGGCTCAGAATGAAAAAAGCATTATGTGTGCAAAATCTTTACACATTTTAGATAG	TCONS_00023895	15	+	30115424	30117856	2	30115424,30117586,	30115571,30117856,	XLOC_011197	Gene_id=XLOC_011197;Gene_name=linc-ARHGAP11B-3;Transcript_id=TCONS_00023895;Transcript_name=linc-ARHGAP11B-3;	XLOC_011197		Divergent	HumanLincRNACatalog	417
p6270	0.350435	0.0353452	2.36365	up	4.12324	4.8858	3.94907	5.80649	5.86088	5.01379	0	TTATGAAATCAAATTCCTTCTGTGACCCCTAGTATGTACCGGTAAATCCAGCTGGAGGGC	ENST00000565934.1	16	+	8941961	8954274	5	8941961,8943705,8944789,8948890,8953984,	8943512,8943850,8944907,8949074,8954274,	ENSG00000260276.1	gene_id "ENSG00000260276.1"; transcript_id "ENST00000565934.1"; gene_type "antisense"; gene_status "NOVEL"; gene_name "RP11-77H9.2"; transcript_type "antisense"; transcript_status "KNOWN"; transcript_name "RP11-77H9.2-001"; level 2; tag "basic"; havana_gene "OTTHUMG00000176818.1"; havana_transcript "OTTHUMT00000433943.1";	ENST00000565934.1		Antisense	ENSEMBL	2288
p5208	0.350581	0.0375315	4.61314	up	3.07722	4.09698	3.1711	6.85581	5.44666	4.66007	0	TCATCTTTGAATAACGTCTCCTTGTTTACCCTGGTATTCTAGAATGTTACAAGATGTTCA	ENST00000560278.1	15	-	64592513	64665980	3	64592513,64658172,64665896,	64592922,64658274,64665980,	ENSG00000259316.1	gene_id "ENSG00000259316.1"; transcript_id "ENST00000560278.1"; gene_type "processed_transcript"; gene_status "NOVEL"; gene_name "CTD-2116N17.1"; transcript_type "processed_transcript"; transcript_status "PUTATIVE"; transcript_name "CTD-2116N17.1-002"; level 2; havana_gene "OTTHUMG00000172470.1"; havana_transcript "OTTHUMT00000418694.1";	ENST00000560278.1	CTD-2116N17.1	Antisense	ENSEMBL	595
p33754	0.34911	0.0324526	2.17466	up	7.67444	7.91623	7.61364	8.82315	9.45341	8.29011	0	GAGGACCATAGGAGGTTTTAAGATTTATGTTTAGTCCGATAGGTGAGGTCTTTGATATTT	uc021pzu.1	10	+	122667788	122669035	1	122667788,	122669035,	AX747838	proteinID=;alignID=uc021pzu.1;kgID=uc021pzu.1;mRNA=AX747838;spID=;refseq=;protAcc=;description=Homo sapiens cDNA FLJ35665 fis, clone SPLEN2017740.;rfamAcc=;tRnaName=;	uc021pzu.1		Antisense	UCSC	1247
p40520_v4	0.354729	0.0491574	3.22273	up	4.92256	4.44217	4.0924	6.40146	7.00024	5.12027	0	TCTTTCAAAATTACTATGTAGGATCAGTGGAACACTAGACACTGACAGAGTGGGCCCTGC	XR_427627.1	4	-	169784537	169786033	3	169784537,169785030,169785522,	169784772,169785124,169786033,	none					RefSeq	840
p29144	0.346721	0.016539	3.63763	up	8.42863	8.53885	8.44015	10.5572	11.0065	9.43293	0	ATGCAAAGAACATGGAAAAATCAAAGTGCTCGAGTGGTTTAAATATGTTTTGGGTATTCC	ENST00000558031.1	16	-	54952965	54957691	3	54952965,54954209,54957496,	54953121,54954322,54957691,	ENSG00000245694.4	gene_id "ENSG00000245694.4"; transcript_id "ENST00000558031.1"; gene_type "antisense"; gene_status "KNOWN"; gene_name "CRNDE"; transcript_type "antisense"; transcript_status "KNOWN"; transcript_name "CRNDE-009"; level 2; tag "basic"; havana_gene "OTTHUMG00000172236.2"; havana_transcript "OTTHUMT00000417434.1";	TCONS_00024270;XLOC_011950	CRNDE	Antisense	ENSEMBL	464
p7561	0.34911	0.0297918	2.12283	up	7.40794	7.5121	7.59457	8.66636	9.11068	7.99554	0	TGAGGTTGGGGAATCCACCCCTGTTCTGGGCTGGGAAGCACTTGCAGACCACAGAGATTT	ENST00000583521.1	17	+	79890273	79890934	2	79890273,79890871,	79890660,79890934,	ENSG00000263585.1	gene_id "ENSG00000263585.1"; transcript_id "ENST00000583521.1"; gene_type "antisense"; gene_status "NOVEL"; gene_name "RP11-498C9.13"; transcript_type "antisense"; transcript_status "KNOWN"; transcript_name "RP11-498C9.13-001"; level 2; tag "basic"; havana_gene "OTTHUMG00000178437.1"; havana_transcript "OTTHUMT00000441969.1";	ENST00000583521.1		Antisense	ENSEMBL	450
p38111_v4	0.346721	0.0131049	2.05568	up	3.32245	3.35235	2.98715	4.39633	4.54449	3.83998	0	CCTCCTACGTGGATATTTTTCTACCTGTCTGCTTTCTACTATTAAAAGAACTATGACCTC	ENST00000607622.1	8	+	66754986	66755566	1	66754986,	66755566,	ENSG00000272192.1	gene_id "ENSG00000272192.1"; transcript_id "ENST00000607622.1"; gene_type "lincRNA"; gene_status "NOVEL"; gene_name "CTD-2532N20.1"; transcript_type "lincRNA"; transcript_status "KNOWN"; transcript_name "CTD-2532N20.1-001"; level 2; tag "basic"; havana_gene "OTTHUMG00000185473.1"; havana_transcript "OTTHUMT00000470581.1";			Intergenic	ENSEMBL	580
p4584	0.348944	0.0268993	2.656	up	4.62739	4.83893	5.47312	6.44081	6.92456	5.80185	0	GACGTACATAAATGAAGAGACTTGTGTGCACTTCCTGTCTGGAGAATTCTGATCGTGGAG	ENST00000556652.1	14	-	75081395	75083315	2	75081395,75083290,	75082037,75083315,	ENSG00000258976.1	gene_id "ENSG00000258976.1"; transcript_id "ENST00000556652.1"; gene_type "lincRNA"; gene_status "NOVEL"; gene_name "CTD-2207P18.2"; transcript_type "lincRNA"; transcript_status "KNOWN"; transcript_name "CTD-2207P18.2-002"; level 2; tag "basic"; havana_gene "OTTHUMG00000171478.1"; havana_transcript "OTTHUMT00000413603.1";	ENST00000556652.1	CTD-2207P18.2	Intergenic	ENSEMBL	667
p41116_v4	0.346721	0.0142507	2.88612	up	3.25716	3.34933	2.72479	5.26146	4.38694	4.27027	0	AGCAGATGACCTTCAAAGGATGGTGAGATTAAATTTACCTACACCTAGAGAAATAATTGG	XR_428021.1	6	-	129860492	129879482	3	129860492,129861591,129879202,	129860520,129861687,129879482,	none					RefSeq	404
p5518	0.348944	0.0261499	2.0808	up	5.79804	5.97595	5.01156	6.67515	6.77715	6.50465	0	CAAGGAAGATGTTTGGAACTATCCAGGAGTAGTGTCAAACACTAACACCATATTTACAAG	ENST00000561039.1	15	+	40800222	40845449	3	40800222,40800530,40845041,	40800266,40800643,40845449,	ENSG00000259536.1	gene_id "ENSG00000259536.1"; transcript_id "ENST00000561039.1"; gene_type "antisense"; gene_status "NOVEL"; gene_name "RP11-111A22.1"; transcript_type "antisense"; transcript_status "KNOWN"; transcript_name "RP11-111A22.1-002"; level 2; tag "basic"; havana_gene "OTTHUMG00000172488.1"; havana_transcript "OTTHUMT00000418763.1";	ENST00000561039.1		Antisense	ENSEMBL	565
p29138	0.348733	0.0221074	2.1592	up	4.07273	4.89685	4.88038	5.90934	5.81908	5.45303	0	GAATCAGGCCACCTTGAGGTTCATCAAGTTCATCCCATTAAAACCTCCCAAAACTCTGGA	ENST00000561547.1	16	-	28890277	28891216	2	28890277,28890809,	28890428,28891216,	ENSG00000260442.1	gene_id "ENSG00000260442.1"; transcript_id "ENST00000561547.1"; gene_type "antisense"; gene_status "NOVEL"; gene_name "RP11-22P6.3"; transcript_type "antisense"; transcript_status "KNOWN"; transcript_name "RP11-22P6.3-002"; level 2; tag "basic"; havana_gene "OTTHUMG00000176592.1"; havana_transcript "OTTHUMT00000432688.1";	ENST00000561547.1		Antisense	ENSEMBL	558
p16898	0.346721	0.0112699	2.01713	up	6.42912	6.77491	6.4559	7.3522	7.9626	7.38204	0	TCTGATATATATGCAAATCTGTGTAAAGTAAACCCTACCTAAAATGTACTGGGGACCCAA	ENST00000442982.1	9	+	123605377	123614881	4	123605377,123607270,123609571,123613515,	123605717,123607474,123609631,123614881,	ENSG00000226752.2	gene_id "ENSG00000226752.2"; transcript_id "ENST00000442982.1"; gene_type "processed_transcript"; gene_status "NOVEL"; gene_name "RP11-27I1.2"; transcript_type "processed_transcript"; transcript_status "KNOWN"; transcript_name "RP11-27I1.2-002"; level 2; havana_gene "OTTHUMG00000020572.2"; havana_transcript "OTTHUMT00000053821.2";	ENST00000442982.1		Divergent	ENSEMBL	1970
p28892	0.35077	0.0394045	2.11044	up	5.85902	5.68148	5.21852	6.66789	7.18546	6.13829	0	ATGGCTCTTATCCAAGGACACATCCCAAGGAACAGCCAGGACTTCCTGGCCTCGCCTGTT	LIT3605	None	None	None	None	None	None	None	LIT3605	Accession=AY927617;Description=Homo sapiens mRNA sequence	CombinedLit_296_590		Intronic	RNAdb	590
p39267_v4	0.348944	0.0235723	2.33206	up	2.40326	3.36923	2.71273	4.22692	4.25539	3.66772	0	TCATGAATGGATTGCAAACATAACCTTCAAGAGCCAAGATCTTGCTGTATCGTCCAGGCT	XR_426677.1	1	-	33074899	33078057	3	33074899,33075697,33077643,	33074928,33075749,33078057,	none					RefSeq	495
RNA96152|RNS_1234_64	0.348944	0.0257042	4.32732	up	2.23821	2.22587	1.90395	4.17687	5.3039	3.22769	0	ACTGAGTCTGCAGAAACCACAGAACTTCAGGTAGTTCACAAACAAAATAAATCAGTGGGG	RNA96152|RNS_1234_64													http://research.imb.uq.edu.au/rnadb/NoncodingRNASearchV2.zip	NA
p841	0.34911	0.0323559	2.04983	up	5.01919	4.89084	5.01081	5.96564	6.58235	5.47935	0	ATTCCACAGTGGCTGTTATCACACTCCATTTACAAGTTGGCTCAGAAAACCGGAGGTGAA	ENST00000416959.1	1	+	21592574	21593744	3	21592574,21592982,21593340,	21592628,21593247,21593744,	ENSG00000236936.1	gene_id "ENSG00000236936.1"; transcript_id "ENST00000416959.1"; gene_type "antisense"; gene_status "NOVEL"; gene_name "RP3-329E20.2"; transcript_type "antisense"; transcript_status "KNOWN"; transcript_name "RP3-329E20.2-001"; level 2; tag "basic"; havana_gene "OTTHUMG00000002623.1"; havana_transcript "OTTHUMT00000007466.1";	ENST00000416959.1		Antisense	ENSEMBL	723
p25538	0.353608	0.0452969	2.29065	up	5.34706	5.11644	5.56178	6.59472	7.19254	5.82528	0	TCTGGAGGAAACCCAAGCCTGCTCTGAAGGGTTTCAGGAAGGTGCTCAGCTCTTGCAGAG	XR_159061.1	8	+	145660556	145665276	6	145660556,145662133,145663081,145663610,145664059,145664858,	145660823,145662378,145663129,145663716,145664165,145665276,	LOC100287098	ID=rna19561;Name=XR_159061.1;Parent=gene16508;Dbxref=GeneID:100287098,Genbank:XR_159061.1;gbkey=misc_RNA;product=uncharacterized LOC100287098;transcript_id=XR_159061.1|ID=gene16508;Name=LOC100287098;Dbxref=GeneID:100287098;gbkey=Gene;gene=LOC100287098	XR_159061.1		Antisense	RefSeq	1190
p1600	0.346721	0.0118044	3.44989	up	2.11741	2.00766	2.67725	3.64441	4.75132	3.76624	0	AGAAAAACAAGGCCCACTTGTACATTCTGCAAGAGCATAAATAAAGCTGTCCTCAGGCGG	ENST00000442700.1	10	-	50504494	50507063	2	50504494,50506853,	50504818,50507063,	ENSG00000236208.1	gene_id "ENSG00000236208.1"; transcript_id "ENST00000442700.1"; gene_type "antisense"; gene_status "NOVEL"; gene_name "C10orf71-AS1"; transcript_type "antisense"; transcript_status "KNOWN"; transcript_name "C10orf71-AS1-002"; level 1; tag "basic"; tag "exp_conf"; havana_gene "OTTHUMG00000018189.1"; havana_transcript "OTTHUMT00000047983.1";	TCONS_00017978;XLOC_008817;TCONS_00017979;XLOC_008817	C10orf71-AS1	Antisense	ENSEMBL	534
p34167_v4	0.346924	0.0182959	2.1163	up	5.86224	5.4855	4.94967	6.59449	6.62053	6.32704	0	GCTGTGCGGGCCCCGCTCCGCTTCGAATGGATACAGTTAAGCTAATGATCTCGAGAGGAT	ENST00000532319.1	11	-	121936267	121971156	2	121936267,121971081,	121937142,121971156,	ENSG00000255248.2	gene_id "ENSG00000255248.2"; transcript_id "ENST00000532319.1"; gene_type "sense_overlapping"; gene_status "NOVEL"; gene_name "RP11-166D19.1"; transcript_type "sense_overlapping"; transcript_status "KNOWN"; transcript_name "RP11-166D19.1-015"; level 2; havana_gene "OTTHUMG00000166058.1"; havana_transcript "OTTHUMT00000387640.1";	ENST00000532319.1		Sense	ENSEMBL	950
p10125	0.350581	0.0383038	2.40205	up	7.16684	6.89052	6.51635	8.16832	8.73924	7.45894	0	CTTTCCATATCTACAAGAACTATTTAGTTCTCAAAACTGGGAAGAAATGTTTCAGAGGCA	ENST00000436616.1	2	+	179278725	179298716	3	179278725,179295421,179298108,	179278840,179295616,179298716,	ENSG00000223960.1	gene_id "ENSG00000223960.1"; transcript_id "ENST00000436616.1"; gene_type "processed_transcript"; gene_status "PUTATIVE"; gene_name "AC009948.5"; transcript_type "processed_transcript"; transcript_status "PUTATIVE"; transcript_name "AC009948.5-006"; level 2; tag "basic"; havana_gene "OTTHUMG00000154423.1"; havana_transcript "OTTHUMT00000335155.1";	ENST00000436616.1		Antisense	ENSEMBL	918
p16670	0.351483	0.0425316	3.03741	up	3.86759	2.56889	4.1826	5.13979	5.54648	4.74132	0	CGGAAGATGTCAGAGCGTTTCCCTAGCAATGTTTTAGAAGTTACTTCTGTCTGGAAAAAA	ENST00000411904.1	9	-	139543061	139554873	2	139543061,139554772,	139543517,139554873,	ENSG00000228401.3	gene_id "ENSG00000228401.3"; transcript_id "ENST00000411904.1"; gene_type "antisense"; gene_status "NOVEL"; gene_name "RP11-251M1.1"; transcript_type "antisense"; transcript_status "KNOWN"; transcript_name "RP11-251M1.1-001"; level 2; tag "basic"; havana_gene "OTTHUMG00000020937.1"; havana_transcript "OTTHUMT00000055093.1";	ENST00000411904.1		Antisense	ENSEMBL	557
p43645_v4	0.348944	0.0261865	3.77989	up	3.78071	4.12319	3.76624	6.5626	6.11179	4.75078	0	GAGTGGTTGGGACAATCCCACTCTAAAGAACTGTTTTGCAAATCTCACAAAGAGTCAGTT	XR_430263.1	19	-	56998594	57049769	4	56998594,56999314,57049019,57049621,	56999221,56999409,57049106,57049769,	none					RefSeq	957
p18357	0.34911	0.0293118	2.00152	up	3.44974	3.07224	3.12907	4.36344	4.60924	3.68166	0	TTTGGAGCTCATAATCAAGTCAGCCTTGCTGCAGGGCTCATTTTAAGCCAGTATCCTGGA	TCONS_00019742	11	-	103655494	103720223	2	103655494,103720141,	103655699,103720223,	XLOC_009536	Gene_id=XLOC_009536;Gene_name=linc-DCUN1D5-4;Transcript_id=TCONS_00019742;Transcript_name=linc-DCUN1D5-4;	XLOC_009536		Intergenic	HumanLincRNACatalog	287
p20235	0.346721	0.00800438	2.60882	up	2.92895	3.57877	3.85961	4.95792	4.77764	4.78196	0	CCTTTGTGCATATGTCTTGATCCACGCCTGATTTTAAAATTTCAGATAAAATCCTAGAAG	TCONS_00025154	17	-	80338988	80340511	2	80338988,80340439,	80339218,80340511,	XLOC_012593	Gene_id=XLOC_012593;Gene_name=linc-SECTM1-1;Transcript_id=TCONS_00025154;Transcript_name=linc-SECTM1-1;	XLOC_012593		Intergenic	HumanLincRNACatalog	302
p43892_v4	0.353608	0.0452635	2.0551	up	3.26071	4.28935	3.57169	5.04919	4.38282	4.80736	0	ATTTGAACACTGTTGAGAAGACTGTGTACAAGAGAGATGTGCCATGTCAGCCTTGCAAGG	XR_244435.2	22	+	39487061	39488552	4	39487061,39487611,39488012,39488534,	39487125,39487801,39488115,39488552,	none					RefSeq	375
p7004	0.34911	0.0290715	2.75627	up	3.27384	4.0974	3.35586	5.19093	5.5581	4.36622	0	TTCTTATAGGAAATGGAACTCTTCATAAGTCTGGCCATGGAGGCATGGTATCCGTAACAT	ENST00000440093.2	17	-	70067183	70115589	4	70067183,70078061,70080046,70115554,	70067372,70078182,70080169,70115589,	ENSG00000234899.4	gene_id "ENSG00000234899.4"; transcript_id "ENST00000440093.2"; gene_type "processed_transcript"; gene_status "NOVEL"; gene_name "AC005152.2"; transcript_type "lincRNA"; transcript_status "KNOWN"; transcript_name "AC005152.2-004"; level 2; havana_gene "OTTHUMG00000132234.5"; havana_transcript "OTTHUMT00000389024.1";	ENCODE_251_2052		Intergenic	ENSEMBL	468
p41854_v4	0.351166	0.0408396	3.72939	up	2.04474	2.74203	1.61564	4.42589	4.72058	2.95275	0	CTATGAAAGGACTGTGTCCTATGAAAGACAGAGTATACATACAGGGTCTCACTCTCTTGC	XR_428590.1	9	-	115167608	115180633	3	115167608,115172201,115180602,	115167628,115172293,115180633,	none					RefSeq	143
p465	0.346721	0.0124531	2.90802	up	5.54657	4.55357	4.69949	6.63098	6.12013	6.66863	0	CTTTAAACATTAACTAAGGGCTTACTCTTCTGAGTGCCCATCTGAAGGTACCTGAACGTG	ENST00000446880.1	1	-	155286653	155291335	4	155286653,155288055,155289593,155290925,	155287796,155288187,155289744,155291335,	ENSG00000225855.2	gene_id "ENSG00000225855.2"; transcript_id "ENST00000446880.1"; gene_type "antisense"; gene_status "KNOWN"; gene_name "RUSC1-AS1"; transcript_type "antisense"; transcript_status "KNOWN"; transcript_name "RUSC1-AS1-001"; level 2; tag "basic"; havana_gene "OTTHUMG00000013912.2"; havana_transcript "OTTHUMT00000039073.2";	uc001fkh.1;UCSC_5673_1836	RUSC1-AS1	Antisense	ENSEMBL	1836
p2324	0.35077	0.0399609	2.41766	up	2.58736	3.25734	3.98374	4.68302	4.68267	4.28358	0	CTCTTGCTACGTTTGCGAGTAGGTGTGTATTGTTTTAACACACGTTTAATAAGCATATTT	ENST00000596071.1	11	-	62538591	62539078	1	62538591,	62539078,	ENSG00000267811.1	gene_id "ENSG00000267811.1"; transcript_id "ENST00000596071.1"; gene_type "antisense"; gene_status "NOVEL"; gene_name "RP11-727F15.11"; transcript_type "antisense"; transcript_status "KNOWN"; transcript_name "RP11-727F15.11-001"; level 2; tag "basic"; havana_gene "OTTHUMG00000183001.1"; havana_transcript "OTTHUMT00000464642.1";	ENST00000596071.1		Antisense	ENSEMBL	487
p8267	0.348944	0.0271556	3.3952	up	4.22115	4.80322	4.3478	6.34255	6.99668	5.32342	0	GCTGTTTTACACGGAACTAAAAAGAGCTTTACAGAGGACCAGATAGACTGCAGGTCCCTA	ENST00000592347.1	19	-	28926294	29218587	10	28926294,28927822,28928391,28952193,28957308,29213476,29215110,29215725,29217200,29218486,	28927722,28928041,28928625,28952404,28957687,29213687,29215225,29215896,29217244,29218587,	ENSG00000267243.1	gene_id "ENSG00000267243.1"; transcript_id "ENST00000592347.1"; gene_type "processed_transcript"; gene_status "NOVEL"; gene_name "AC005307.3"; transcript_type "processed_transcript"; transcript_status "KNOWN"; transcript_name "AC005307.3-001"; level 2; tag "basic"; havana_gene "OTTHUMG00000180802.1"; havana_transcript "OTTHUMT00000453069.1";	TCONS_00026844;XLOC_013288		Intergenic	ENSEMBL	3113
RNA33675|snoRNA_scaRNA_271_77	0.348681	0.0211843	4.78441	up	3.22901	2.64179	2.09956	4.64637	5.91894	4.18008	0	ATGAGACAGTGTTTATGAACAAAAGATCATGATTAATCCAGTTCTGCACAAAACACTGAG	RNA33675|snoRNA_scaRNA_271_77													ftp://ftp.ensembl.org/pub/current/fasta/homo_sapiens/ncrna/Homo_sapiens.GRCh37.61.ncrna.fa.gz	NA
p19760	0.35077	0.0398114	2.51465	up	5.06008	5.60437	5.61922	7.55399	6.24981	6.47095	0	TAATATTTGATTTATTTTTCCAACTGGACTTCTTCCCGGGGCTCTTTCTGGGCCCAGCTG	TCONS_00023421	15	+	57592197	57599266	4	57592197,57593636,57594546,57595297,	57593122,57593805,57595211,57599266,	XLOC_011264	Gene_id=XLOC_011264;Gene_name=linc-CGNL1-2;Transcript_id=TCONS_00023421;Transcript_name=linc-CGNL1-2;	XLOC_011264		Intergenic	HumanLincRNACatalog	5728
p15666	0.346745	0.0177932	2.38115	up	4.04214	4.39687	4.89105	5.57128	6.10101	5.41276	0	AAGGAAAAACTGGAGTTCCTTTCCCCTAGTGAGCATACAAAGGCTTTTCATCCGCTGAAC	ENST00000521623.1	8	-	38401169	38410198	3	38401169,38408972,38410138,	38401364,38409096,38410198,	ENSG00000253361.1	gene_id "ENSG00000253361.1"; transcript_id "ENST00000521623.1"; gene_type "lincRNA"; gene_status "NOVEL"; gene_name "RP11-675F6.3"; transcript_type "lincRNA"; transcript_status "KNOWN"; transcript_name "RP11-675F6.3-001"; level 2; tag "basic"; havana_gene "OTTHUMG00000163993.1"; havana_transcript "OTTHUMT00000376670.1";	ENST00000521623.1		Intergenic	ENSEMBL	379
RNA147255|p0359_imsncRNA777	0.346721	0.00972043	2.25263	up	3.10338	3.75619	3.77521	4.69416	4.51693	4.93851	0	AGCGCCAGTATCACCTCCAATCAGAGGTGTAGCCCATCAGAGAGTTCGGGCTGCTTTAGC	RNA147255|p0359_imsncRNA777								nc018					PubMed ID:21789175	NA
p1282	0.351023	0.0401474	2.13158	up	4.18176	4.11437	3.74534	5.427	5.46107	4.42916	0	TTCATACTTATTGTTCTTTCAATAGCAAAATGTACTGAAAGCTCTCCAGTCCCCCCTCCA	ENST00000564300.1	1	+	178449741	178450341	1	178449741,	178450341,	ENSG00000260938.1	gene_id "ENSG00000260938.1"; transcript_id "ENST00000564300.1"; gene_type "sense_overlapping"; gene_status "NOVEL"; gene_name "RP4-593C16.3"; transcript_type "sense_overlapping"; transcript_status "KNOWN"; transcript_name "RP4-593C16.3-001"; level 2; tag "basic"; havana_gene "OTTHUMG00000176134.1"; havana_transcript "OTTHUMT00000431555.1";	HIT000066025;H-InvDB_561_600		Sense	ENSEMBL	600
p9046	0.346721	0.00911048	2.04135	up	3.65649	3.77824	3.64226	4.65367	5.12079	4.3911	0	AAATACCATTTTCCCGGGAACATCTGGAATGCGCTTGCTTTTATTTCTTCCTCCCCAGAG	ENST00000602736.1	2	-	20786007	20786446	1	20786007,	20786446,	ENSG00000269976.1	gene_id "ENSG00000269976.1"; transcript_id "ENST00000602736.1"; gene_type "lincRNA"; gene_status "NOVEL"; gene_name "RP11-130L8.2"; transcript_type "lincRNA"; transcript_status "KNOWN"; transcript_name "RP11-130L8.2-001"; level 2; tag "basic"; havana_gene "OTTHUMG00000183968.1"; havana_transcript "OTTHUMT00000467632.1";	ENST00000602736.1		Intergenic	ENSEMBL	439
p39453_v4	0.346721	0.00117448	2.41508	up	3.61602	3.61311	3.9468	4.97756	5.19206	4.82252	0	GGAGAAAATTTGTACCCAGACCTTGCTGCTTAGAAATATAAAATATATGGCTCTGAAGAA	XR_426845.1	1	+	153895885	153907713	3	153895885,153901110,153907224,	153896438,153901246,153907713,	none					RefSeq	1178
p277	0.354729	0.0491221	2.44213	up	6.3667	5.70186	5.9963	8.05506	7.26905	6.60517	0	GCACATTAGGTTTTGTGTCTTCATTCTGGGTACCTACTCTTCATATTATTCTACCAACTT	ENST00000443802.1	1	-	91297425	91317207	3	91297425,91303106,91317039,	91297753,91303322,91317207,	ENSG00000233593.1	gene_id "ENSG00000233593.1"; transcript_id "ENST00000443802.1"; gene_type "processed_transcript"; gene_status "NOVEL"; gene_name "RP4-665J23.1"; transcript_type "processed_transcript"; transcript_status "KNOWN"; transcript_name "RP4-665J23.1-003"; level 2; havana_gene "OTTHUMG00000010018.1"; havana_transcript "OTTHUMT00000027726.1";	ENCODE_1031_712;TCONS_00000088;XLOC_000915;TCONS_00000563;XLOC_000915		Intergenic	ENSEMBL	712
p16797	0.346721	0.0104028	2.05961	up	5.86925	5.42816	5.36348	6.88892	6.31835	6.58075	0	CCCAGATCAGCCTCTGCTGACAGTTCTCTTGTAAAGATACTGAGGATAGGATTACAGGTA	ENST00000427901.1	9	+	74872251	74872699	2	74872251,74872408,	74872321,74872699,	ENSG00000235523.1	gene_id "ENSG00000235523.1"; transcript_id "ENST00000427901.1"; gene_type "lincRNA"; gene_status "NOVEL"; gene_name "RP11-63P12.7"; transcript_type "lincRNA"; transcript_status "KNOWN"; transcript_name "RP11-63P12.7-001"; level 2; tag "basic"; havana_gene "OTTHUMG00000020009.1"; havana_transcript "OTTHUMT00000052650.1";	ENCODE_2588_361;TCONS_00015691;XLOC_007398		Intergenic	ENSEMBL	361
p466	0.348745	0.0224904	2.11654	up	6.63654	5.86195	6.05866	7.41525	6.8929	7.49412	0	AGAAGACTTCTGTGCTATGGAGACTTGGAAAGTGACATAACATGTTTGGCTCAGACTCCC	ENST00000543656.1	1	-	155287223	155291318	2	155287223,155290925,	155288187,155291318,	ENSG00000225855.2	gene_id "ENSG00000225855.2"; transcript_id "ENST00000543656.1"; gene_type "antisense"; gene_status "KNOWN"; gene_name "RUSC1-AS1"; transcript_type "antisense"; transcript_status "KNOWN"; transcript_name "RUSC1-AS1-201"; level 3; tag "basic"; havana_gene "OTTHUMG00000013912.2";	ENST00000543656.1	RUSC1-AS1	Antisense	ENSEMBL	1357
p21623	0.354729	0.0491415	3.29413	up	4.17788	4.05266	4.57757	6.34029	6.79848	4.82902	0	CATGAGCCTCGAAAATCCTCATCTCCAATGATTCACTCTTATTAATAAGATCACTAATGA	TCONS_00029147	21	-	43208993	43211778	2	43208993,43211477,	43209185,43211778,	XLOC_014088	Gene_id=XLOC_014088;Gene_name=linc-RIPK4-1;Transcript_id=TCONS_00029147;Transcript_name=linc-RIPK4-1;	XLOC_014088		Intergenic	HumanLincRNACatalog	493
p22705	0.346924	0.0182504	2.46712	up	2.92827	3.10565	3.28899	3.95002	5.02979	4.25159	0	ACTGTGCTCAATTAGAGGAACTCATTGCCTATGGCATAGTGTCATGTAATAAAATGGTTT	TCONS_00010322	5	-	43012799	43018741	2	43012799,43016463,	43015252,43018741,	XLOC_004804	Gene_id=XLOC_004804;Gene_name=linc-SEPP1-1;Transcript_id=TCONS_00010322;Transcript_name=linc-SEPP1-1;	XLOC_004804		Intergenic	HumanLincRNACatalog	4731
p6031	0.351023	0.0401466	2.01132	up	6.11752	6.17259	6.39871	6.98875	7.88307	6.84143	0	TGTGAAGGTGTCCTGCACAGTTCTTGTAGATGTCATTTTAGTTTGTGGTTGACGTGCATG	ENST00000558952.1	16	-	54957192	54962798	3	54957192,54959012,54962681,	54957562,54959125,54962798,	ENSG00000245694.4	gene_id "ENSG00000245694.4"; transcript_id "ENST00000558952.1"; gene_type "antisense"; gene_status "KNOWN"; gene_name "CRNDE"; transcript_type "antisense"; transcript_status "KNOWN"; transcript_name "CRNDE-004"; level 2; tag "basic"; havana_gene "OTTHUMG00000172236.2"; havana_transcript "OTTHUMT00000417437.1";	TCONS_00024270;XLOC_011950	CRNDE	Antisense	ENSEMBL	600
p28686	0.346924	0.0192802	4.53533	up	5.22541	5.54503	3.93387	7.58699	7.10536	6.55559	0	CTTTCTGGTCTCAATTGCAAAGTATGTGAAAATGTGTATGAAAGATCTAAAAGCTACCCG	ASO3954	None	None	None	None	None	None	None	ASO3954	Accession=AJ293393;Description=Homo sapiens mRNA differentially expressed in malignant melanoma, clone MM D3.	asoverlaps_941_518			RNAdb	518
p25743	0.351483	0.042547	2.94292	up	6.95074	6.9456	7.14156	9.04917	9.14206	7.51842	0	GACAGGTTTTGGCTCATTTCCAATCATGGTGCAATATAGTGTAACATTCATTTGTTTTCA	uc001iqe.3	10	+	18967048	18970568	1	18967048,	18970568,	AK022915	proteinID=;alignID=uc001iqe.3;kgID=uc001iqe.3;mRNA=AK022915;spID=;refseq=;protAcc=;description=Homo sapiens cDNA FLJ12853 fis, clone NT2RP2003456.;rfamAcc=;tRnaName=;	uc001iqe.3		Divergent	UCSC	3520
p12835	0.346721	0.00340679	2.43599	up	4.1479	4.27951	4.05745	5.74788	5.51273	5.07777	0	GGAGTTGAAGAATTTTCCAGTGAGTTCCATCAAAGTAAATAAACCAACCTAGAGCATCAG	ENST00000506314.1	4	+	109093864	109097584	2	109093864,109094574,	109094214,109097584,	ENSG00000232021.2	gene_id "ENSG00000232021.2"; transcript_id "ENST00000506314.1"; gene_type "processed_transcript"; gene_status "NOVEL"; gene_name "LEF1-AS1"; transcript_type "retained_intron"; transcript_status "KNOWN"; transcript_name "LEF1-AS1-003"; level 2; havana_gene "OTTHUMG00000161028.1"; havana_transcript "OTTHUMT00000363475.1";	ENST00000506314.1	LEF1-AS1	Intergenic	ENSEMBL	3360
p14055	0.346721	0.0135041	2.84353	up	5.31139	4.59661	4.94101	6.56783	6.89854	5.9057	0	CCTTTCCCTTCTCAGGACATACACAGGACTGGGAGAAAATAGACTAAGTATTTGATATTA	ENST00000503428.1	5	+	179085265	179091431	2	179085265,179091323,	179085482,179091431,	ENSG00000250999.1	gene_id "ENSG00000250999.1"; transcript_id "ENST00000503428.1"; gene_type "antisense"; gene_status "NOVEL"; gene_name "RP11-1379J22.5"; transcript_type "antisense"; transcript_status "KNOWN"; transcript_name "RP11-1379J22.5-001"; level 2; tag "basic"; havana_gene "OTTHUMG00000163211.2"; havana_transcript "OTTHUMT00000372095.1";	TCONS_00009559;XLOC_004677;TCONS_00009560;XLOC_004677;TCONS_00009561;XLOC_004677		Antisense	ENSEMBL	325
p35791_v4	0.346721	0.00156865	3.11601	up	3.53775	3.51576	3.74986	5.2161	5.60052	4.90585	0	TTCTAGAAGCTTGTATCAGTCATACAACACCCCTTTGAGGAACCGTTTGAGGTGTGGCAC	TCONS_00024951	16	-	4295966	4301418	2	4295966,4301322,	4297062,4301418,	XLOC_011867	Gene_id=XLOC_011867;Gene_name=linc-SRL-1;Transcript_id=TCONS_00024951;Transcript_name=linc-SRL-1;	XLOC_011867		Intergenic	HumanLincRNACatalog	1192
p28517	0.348944	0.0234751	5.05337	up	2.65254	3.96974	3.12796	6.08898	6.14619	4.52681	0	GAAGGATCCAGTTAATTTCGGCTCTTTCTACAGTTCTTTTATGGAAAGAGGATAAATATC	ASO1902	None	None	None	None	None	None	None	ASO1902	Accession=AK125997;Description=Homo sapiens cDNA FLJ44009 fis, clone TESTI4024096.	asoverlaps_44_3799		Antisense	RNAdb	3799
p14141	0.346721	0.0146039	2.23705	up	6.36982	5.99904	5.58703	7.10193	7.45841	6.88034	0	AAACAACTTGACTAAACAACACAGTTCATGGTAAAGCCCAAGACTGTACCTGCCCATCCA	ENST00000602550.1	6	-	30257072	30294181	3	30257072,30263908,30293927,	30257271,30264014,30294181,	ENSG00000231074.3	gene_id "ENSG00000231074.3"; transcript_id "ENST00000602550.1"; gene_type "antisense"; gene_status "KNOWN"; gene_name "HCG18"; transcript_type "antisense"; transcript_status "KNOWN"; transcript_name "HCG18-012"; level 2; tag "basic"; havana_gene "OTTHUMG00000031138.4"; havana_transcript "OTTHUMT00000468041.1";	ENST00000602550.1	HCG18	Antisense	ENSEMBL	559
p16918	0.346721	0.00932983	2.98666	up	3.76258	3.0067	3.61252	5.46025	5.04235	4.61481	0	AAGTTTTGATGCAAAAACACAGACCGTCCATTGTCCTATGGGCTAAGTGGACTCCCTTCT	ENST00000437461.1	9	+	127025154	127028088	2	127025154,127027858,	127025297,127028088,	ENSG00000227200.1	gene_id "ENSG00000227200.1"; transcript_id "ENST00000437461.1"; gene_type "sense_intronic"; gene_status "NOVEL"; gene_name "RP11-121A14.3"; transcript_type "sense_intronic"; transcript_status "KNOWN"; transcript_name "RP11-121A14.3-001"; level 2; tag "basic"; havana_gene "OTTHUMG00000020649.1"; havana_transcript "OTTHUMT00000054014.1";	ENST00000437461.1		Sense	ENSEMBL	373
p33817	0.346721	0.0121664	3.25914	up	7.8285	6.8593	8.07005	9.38098	9.4551	9.03525	0	GCTGATATGCCTTAAACTGTAGTTGTAGATCCTTGTCATTTTGCTGTTTGAAAATAACCA	uc021xph.1	4	+	77953942	77959593	1	77953942,	77959593,	FW340024	proteinID=;alignID=uc021xph.1;kgID=uc021xph.1;mRNA=FW340024;spID=;refseq=;protAcc=;description=Homo sapiens cDNA FLJ42601 fis, clone BRACE3010438.;rfamAcc=;tRnaName=;	uc021xph.1		Antisense	UCSC	5651
p6030	0.346721	0.0123902	4.34198	up	7.53419	7.79907	7.75981	10.1242	10.4543	8.86966	0	CCACTGGAAATGTTGAAATGAAAAATATTCAGCCGTTGGTCTTTGAAATTTCCTGTGATG	ENST00000560912.1	16	-	54953084	54962724	6	54953084,54954209,54957496,54958512,54959012,54962681,	54953121,54954322,54957562,54958599,54959125,54962724,	ENSG00000245694.4	gene_id "ENSG00000245694.4"; transcript_id "ENST00000560912.1"; gene_type "antisense"; gene_status "KNOWN"; gene_name "CRNDE"; transcript_type "antisense"; transcript_status "KNOWN"; transcript_name "CRNDE-008"; level 2; tag "basic"; havana_gene "OTTHUMG00000172236.2"; havana_transcript "OTTHUMT00000417436.1";	TCONS_00024270;XLOC_011950	CRNDE	Antisense	ENSEMBL	459
p33678	0.346745	0.0177279	2.21956	up	6.92678	6.45807	6.83023	8.1576	8.13773	7.37056	0	CGGCCTAATTTTTCTGACTCTTACGAAAACGATTGCCAACACATACTTCTACTTTTAAAT	NR_037652.1	15	-	80191181	80216096	3	80191181,80199970,80215793,	80191467,80200026,80216096,	ST20	ID=rna31614;Name=NR_037652.1;Parent=gene26825;Dbxref=GeneID:400410,Genbank:NR_037652.1,HGNC:33520;gbkey=misc_RNA;product=suppressor of tumorigenicity 20%2C transcript variant 4;transcript_id=NR_037652.1|ID=gene26825;Name=ST20;Dbxref=GeneID:400410,HGNC:33520;description=suppressor of tumorigenicity 20;gbkey=Gene;gene=ST20;gene_synonym=HCCS-1	UCSC:uc002bfa.4		Antisense	RefSeq	645
p33808	0.348944	0.0256827	3.31837	up	6.57955	6.03821	5.49955	7.69103	8.48093	7.13677	0	TGGACTGTGACCATGTACCTTCCTTTTTAAGAAAAATAAACTGCTTTATGGAAGTTGGTA	uc002zha.3	21	-	46683842	46697325	6	46683842,46685936,46687504,46689753,46696931,46697147,	46685550,46686142,46687628,46689934,46697057,46697325,	POFUT2	proteinID=;alignID=uc002zha.3;kgID=uc002zha.3;mRNA=BC011044;spID=;refseq=;protAcc=;description=Homo sapiens protein O-fucosyltransferase 2 (POFUT2), transcript variant 2, non-coding RNA.;rfamAcc=;tRnaName=;	uc002zha.3		Antisense	UCSC	2523
p26517	0.353608	0.0458052	2.16439	up	3.62385	4.10345	4.67951	5.19655	5.69173	4.86041	0	TAAAAGATGCTGCTGAACAGAAGTTTTTCCTTTCCTGAAAGCCTCATCTACCTTAATTTC	uc003zmh.1	9	+	16216805	16219226	1	16216805,	16219226,	BX648501	proteinID=;alignID=uc003zmh.1;kgID=uc003zmh.1;mRNA=BX648501;spID=;refseq=;protAcc=;description=Homo sapiens cDNA FLJ36669 fis, clone UTERU2004015.;rfamAcc=;tRnaName=;	UCSC_3467_2421		Intronic	UCSC	2421
p36849_v4	0.346924	0.0190433	2.14894	up	5.00971	4.92256	4.9329	6.2837	6.40696	5.4854	0	CAACAGGGTTAACAATTTCCAGAGACAGCCCGTACATAGAAGGAATGTTTACTGAAAAAA	ENST00000610043.1	1	+	32109649	32125377	6	32109649,32117449,32117711,32121511,32122497,32125298,	32109897,32117589,32117845,32121645,32122662,32125377,	ENSG00000235790.3	gene_id "ENSG00000235790.3"; transcript_id "ENST00000610043.1"; gene_type "antisense"; gene_status "NOVEL"; gene_name "RP11-73M7.6"; transcript_type "antisense"; transcript_status "KNOWN"; transcript_name "RP11-73M7.6-010"; level 2; tag "basic"; havana_gene "OTTHUMG00000003881.4"; havana_transcript "OTTHUMT00000472545.1";			Antisense	ENSEMBL	900
p37171_v4	0.346721	0.016736	2.72371	up	8.26553	8.90904	8.19746	10.085	10.2826	9.34117	0	CAGCCTGAAGTAGTAAGAAAAAGTTCGTTCTATGTTCAGGATATTCTTCAAAGTCCTAAA	ENST00000578974.2	2	+	61698589	61711265	4	61698589,61698883,61709761,61711040,	61698614,61698943,61709871,61711265,	ENSG00000270820.1	gene_id "ENSG00000270820.1"; transcript_id "ENST00000578974.2"; gene_type "antisense"; gene_status "NOVEL"; gene_name "RP11-355B11.2"; transcript_type "antisense"; transcript_status "KNOWN"; transcript_name "RP11-355B11.2-003"; level 2; tag "basic"; havana_gene "OTTHUMG00000185251.1"; havana_transcript "OTTHUMT00000469982.1";			Antisense	ENSEMBL	420
p12752	0.346924	0.0196802	3.79682	up	2.10958	1.75964	2.65986	4.301	4.74146	3.26099	0	TGGGTTGATAGCTTATGGCAGTGATAGTCAAGTGTATCACGCCGTGAAGTCAACTGTTTG	ENST00000502758.1	4	+	68597861	68656229	6	68597861,68617398,68619338,68619876,68620906,68656165,	68598063,68617432,68619436,68619958,68620973,68656229,	ENSG00000248049.2	gene_id "ENSG00000248049.2"; transcript_id "ENST00000502758.1"; gene_type "processed_transcript"; gene_status "NOVEL"; gene_name "RP11-453E17.1"; transcript_type "processed_transcript"; transcript_status "KNOWN"; transcript_name "RP11-453E17.1-004"; level 2; havana_gene "OTTHUMG00000160769.4"; havana_transcript "OTTHUMT00000362256.1";	ENST00000502758.1		Antisense	ENSEMBL	547
p17285	0.354588	0.0485468	4.25249	up	3.5398	1.47921	1.19232	4.29184	4.18865	3.99577	0	AGGGAGTGAATCTAAACCTATGGACAGATTCATCTTGGAAACCCTAAGTGAGGCTAAAGT	ENST00000431145.1	Y	-	2869668	2870612	3	2869668,2870353,2870578,	2869964,2870442,2870612,	ENSG00000233070.1	gene_id "ENSG00000233070.1"; transcript_id "ENST00000431145.1"; gene_type "processed_transcript"; gene_status "NOVEL"; gene_name "ZFY-AS1"; transcript_type "processed_transcript"; transcript_status "KNOWN"; transcript_name "ZFY-AS1-002"; level 2; havana_gene "OTTHUMG00000036156.1"; havana_transcript "OTTHUMT00000088059.1";	ENST00000431145.1	ZFY-AS1	Intergenic	ENSEMBL	419
p7276	0.348944	0.0241575	2.48579	up	3.4225	3.35188	2.62823	4.63766	4.79401	3.91206	0	GCAAAACTCCAAGCTGAGCTTAGTTTTGCCTGTGCACAGAGACCTTTTTACTCTCATTCT	ENST00000579154.1	17	+	27271813	27272412	1	27271813,	27272412,	ENSG00000265908.1	gene_id "ENSG00000265908.1"; transcript_id "ENST00000579154.1"; gene_type "antisense"; gene_status "NOVEL"; gene_name "RP11-20B24.6"; transcript_type "antisense"; transcript_status "KNOWN"; transcript_name "RP11-20B24.6-001"; level 2; tag "basic"; havana_gene "OTTHUMG00000179500.1"; havana_transcript "OTTHUMT00000446752.1";	ENST00000579154.1		Antisense	ENSEMBL	599
p26265	0.35359	0.0451131	2.26651	up	5.80499	5.33752	5.77942	7.38334	6.98569	6.09431	0	AATATCAAGGCAACCACAACATGTCATGCTTTTTCTTCTTTTGAAACATCATCACAGTTG	uc003hdo.1	4	+	68608242	68609312	1	68608242,	68609312,	BC045560	proteinID=;alignID=uc003hdo.1;kgID=uc003hdo.1;mRNA=BC045560;spID=;refseq=;protAcc=;description=Homo sapiens cDNA clone IMAGE:5303305.;rfamAcc=;tRnaName=;	UCSC_8901_1070		Intronic	UCSC	1070
p13659	0.346721	0.0156571	2.48849	up	4.14583	4.23313	4.31216	5.94952	5.77886	4.90855	0	AACATGTACCGGTTTAGATCTGACAGAGATATCACAATTGTAGGATTGCATCTTTTAGCA	ENST00000506791.1	5	+	43018584	43024336	3	43018584,43019337,43024300,	43018774,43019418,43024336,	ENSG00000251131.1	gene_id "ENSG00000251131.1"; transcript_id "ENST00000506791.1"; gene_type "antisense"; gene_status "NOVEL"; gene_name "CTD-2035E11.3"; transcript_type "antisense"; transcript_status "KNOWN"; transcript_name "CTD-2035E11.3-002"; level 1; tag "basic"; tag "exp_conf"; havana_gene "OTTHUMG00000162236.1"; havana_transcript "OTTHUMT00000368048.1";	ENST00000506791.1	CTD-2035E11.3	Antisense	ENSEMBL	307
p44133_v4	0.349965	0.0342297	2.8618	up	4.68096	4.4747	4.49287	6.1442	6.84874	5.20637	0	CAGTTGCAATACTTAAGGCAAATTCATCTTGCTTATAACTCTGGTGCATGTGCATTAAAA	uc003drw.3	3	+	97483594	97519953	10	97483594,97484834,97486924,97499002,97499458,97503798,97506833,97510614,97516867,97519546,	97483821,97484933,97487074,97499064,97499527,97503893,97506963,97510670,97517047,97519953,	ARL6	BC024239	Homo sapiens ADP-ribosylation factor-like 6 (ARL6), transcript variant 4, non-coding RNA.			UCSC	1475
p7697	0.353986	0.0476129	4.33337	up	3.80733	4.16964	3.97416	6.85421	6.82739	4.616	0	CATTGTCGTGAAATCTTCATTCATGAGACATTCCAGTTTACCGGCAGTGTCGACTAGAAT	ENST00000579251.1	18	-	29130094	29136868	4	29130094,29134604,29135925,29136519,	29130322,29134678,29136084,29136868,	ENSG00000264859.1	gene_id "ENSG00000264859.1"; transcript_id "ENST00000579251.1"; gene_type "antisense"; gene_status "NOVEL"; gene_name "RP11-75N4.2"; transcript_type "antisense"; transcript_status "KNOWN"; transcript_name "RP11-75N4.2-002"; level 2; tag "basic"; havana_gene "OTTHUMG00000179650.1"; havana_transcript "OTTHUMT00000447509.1";	ENST00000579251.1		Antisense	ENSEMBL	810
p37980_v4	0.35077	0.0388711	2.38233	up	5.02606	4.85504	4.85536	6.16936	6.87173	5.45248	0	GCTTTGCTTTTGTTCCTCAATCCTTTACCCAAAAATGGCTGAATTATTTCTGTGCAGTTA	ENST00000602992.1	7	-	25988276	25989023	1	25988276,	25989023,	ENSG00000270933.1	gene_id "ENSG00000270933.1"; transcript_id "ENST00000602992.1"; gene_type "lincRNA"; gene_status "NOVEL"; gene_name "CTD-2227E11.1"; transcript_type "lincRNA"; transcript_status "KNOWN"; transcript_name "CTD-2227E11.1-001"; level 2; tag "basic"; havana_gene "OTTHUMG00000185220.1"; havana_transcript "OTTHUMT00000469903.1";			Intergenic	ENSEMBL	747
p538	0.346924	0.0187393	2.13416	up	9.79374	9.42569	9.5768	10.9046	11.0077	10.1649	0	TATGTTGGCTTCGCTTTCAGGGTTTTTAATGACCACAACAAGCAAGCATGCAGCTTACTG	ENST00000454813.1	1	-	173833039	173834009	3	173833039,173833394,173833812,	173833213,173833644,173834009,	ENSG00000234741.2	gene_id "ENSG00000234741.2"; transcript_id "ENST00000454813.1"; gene_type "processed_transcript"; gene_status "KNOWN"; gene_name "GAS5"; transcript_type "retained_intron"; transcript_status "KNOWN"; transcript_name "GAS5-026"; level 2; havana_gene "OTTHUMG00000037216.2"; havana_transcript "OTTHUMT00000090602.1";	ENST00000454813.1	GAS5	Intergenic	ENSEMBL	621
p30162	0.35077	0.0393852	2.57917	up	2.83919	2.61849	3.3909	4.56923	4.83091	3.54916	0	TTCCATCTGGCCAGATGATCTCCAGGATACTCTCATGTATGTCAATAATAACTTTTCTTT	XR_108985.1	9	+	102293825	102299206	2	102293825,102298904,	102294094,102299206,	LOC100507438	ID=rna20509;Name=XR_108985.1;Parent=gene17513;Dbxref=GeneID:100507438,Genbank:XR_108985.1;gbkey=misc_RNA;product=uncharacterized LOC100507438;transcript_id=XR_108985.1|ID=gene17513;Name=LOC100507438;Dbxref=GeneID:100507438;gbkey=Gene;gene=LOC100507438	XR_108985.1		Intergenic	RefSeq	571
p25452	0.346721	0.0160717	2.41541	up	7.68489	7.69472	8.0046	9.30856	9.42165	8.47081	0	CTGCCTCCTGAATCGTTGAGGAGTCTTTTAAATTAGATTTTTGTTTTGTTGTCTCCCAAG	NR_024412.1	7	-	112756772	112758637	3	112756772,112758122,112758494,	112757662,112758216,112758637,	LOC401397	ID=rna17342;Name=NR_024412.1;Parent=gene14550;Dbxref=GeneID:401397,Genbank:NR_024412.1;gbkey=misc_RNA;product=uncharacterized LOC401397%2C transcript variant 1;transcript_id=NR_024412.1|ID=gene14550;Name=LOC401397;Dbxref=GeneID:401397;description=uncharacterized LOC401397;gbkey=Gene;gene=LOC401397	RefSeq_2659_1127		Intergenic	RefSeq	1127
p36839_v4	0.328765	0.000126812	4.84933	up	2.16872	2.13091	2.1795	4.47224	4.68679	4.15345	0	CCTTTACTGAGGAAACAATTCAGGAACATCACTCTTAGTAAGGCAATTGTTGATTATAAG	ENST00000604716.1	1	-	28566019	28567964	1	28566019,	28567964,	ENSG00000270605.1	gene_id "ENSG00000270605.1"; transcript_id "ENST00000604716.1"; gene_type "antisense"; gene_status "NOVEL"; gene_name "RP5-1092A3.4"; transcript_type "antisense"; transcript_status "KNOWN"; transcript_name "RP5-1092A3.4-001"; level 2; tag "basic"; havana_gene "OTTHUMG00000185161.1"; havana_transcript "OTTHUMT00000469689.1";			Antisense	ENSEMBL	1945
p20500	0.353608	0.0456659	15.0998	up	2.38975	3.26513	3.54175	6.49388	9.47616	4.97595	0	TGATGTCCTCGGATCAGTCCACAAAAGAAACAGGGACCTGTTAATGCACTGATTCAAGTG	TCONS_00026271	18	+	5887502	5890156	3	5887502,5889078,5889271,	5887721,5889172,5890156,	XLOC_012618	Gene_id=XLOC_012618;Gene_name=linc-ARHGAP28-2;Transcript_id=TCONS_00026271;Transcript_name=linc-ARHGAP28-2;	XLOC_012618		Divergent	HumanLincRNACatalog	1198
p35031_v4	0.346721	0.00555305	2.40994	up	5.6019	5.49021	5.04662	6.85696	6.75552	6.33325	0	GGAGGAGAAACAATACATTCACAAACAATGTTTTAGGTGATGAAGTACCTGCTGCCAGAG	ENST00000598783.1	3	+	69063134	69097715	4	69063134,69063288,69084125,69097338,	69063211,69063352,69084301,69097715,	ENSG00000244513.2	gene_id "ENSG00000244513.2"; transcript_id "ENST00000598783.1"; gene_type "antisense"; gene_status "NOVEL"; gene_name "CTD-2013N24.2"; transcript_type "antisense"; transcript_status "KNOWN"; transcript_name "CTD-2013N24.2-003"; level 2; tag "RNA_Seq_supported_only"; tag "basic"; havana_gene "OTTHUMG00000158770.2"; havana_transcript "OTTHUMT00000461512.1";	ENST00000598783.1	CTD-2013N24.2	Antisense	ENSEMBL	694
p11962	0.351166	0.0414523	2.26575	up	2.53249	3.47241	3.7166	4.40403	4.13737	4.72007	0	AAGTTTGTTGATCAAACCCAGACACAAGGTCTGTCAGAATCTACCACAGCATTCCCTATC	ENST00000383461.2	3	+	129036948	129045068	4	129036948,129037385,129042192,129043023,	129037153,129037480,129042447,129045068,	ENSG00000206417.4	gene_id "ENSG00000206417.4"; transcript_id "ENST00000383461.2"; gene_type "antisense"; gene_status "NOVEL"; gene_name "H1FX-AS1"; transcript_type "antisense"; transcript_status "KNOWN"; transcript_name "H1FX-AS1-001"; level 2; tag "basic"; havana_gene "OTTHUMG00000159459.4"; havana_transcript "OTTHUMT00000355523.2";	ENST00000383461.2	H1FX-AS1	Antisense	ENSEMBL	2600
p6559	0.346721	0.0110063	2.7814	up	4.06264	3.87114	4.55046	5.8542	5.93842	5.11904	0	AAGAAAAACTACCATTGCAGATGCTCAAGAACTCTTAACATCTGTCTTTCTATTCACTGA	ENST00000602706.1	16	+	85817987	85821223	2	85817987,85821201,	85818654,85821223,	ENSG00000270184.1	gene_id "ENSG00000270184.1"; transcript_id "ENST00000602706.1"; gene_type "antisense"; gene_status "NOVEL"; gene_name "RP11-568J23.5"; transcript_type "antisense"; transcript_status "KNOWN"; transcript_name "RP11-568J23.5-001"; level 2; tag "basic"; tag "CCDS"; ccdsid "CCDS35023.1"; havana_gene "OTTHUMG00000183877.1"; havana_transcript "OTTHUMT00000467262.1";	ENST00000602706.1		Antisense	ENSEMBL	689
p6563	0.34911	0.0288578	3.26875	up	3.29375	4.14196	4.93773	5.56416	6.2031	5.73238	0	ATGCTCCAGAGCAGACGCTCCTGTTTACAGAGCTGAAACTCAGTACTCATTAAACAACTC	ENST00000595705.1	16	+	86380992	86383217	3	86380992,86381498,86382986,	86381055,86382105,86383217,	ENSG00000269826.1	gene_id "ENSG00000269826.1"; transcript_id "ENST00000595705.1"; gene_type "lincRNA"; gene_status "NOVEL"; gene_name "RP11-158I3.3"; transcript_type "lincRNA"; transcript_status "KNOWN"; transcript_name "RP11-158I3.3-001"; level 2; tag "basic"; havana_gene "OTTHUMG00000183868.1"; havana_transcript "OTTHUMT00000467208.1";	ENST00000595705.1		Intergenic	ENSEMBL	901
p33760	0.346721	0.0157627	3.72589	up	3.87239	3.87408	3.52841	5.9871	6.22781	4.75273	0	CCATTCACTCCCGTTCTCATTTACATCTGTTTTCCTGTTGTATATATCACCTTTGTTGAC	uc001nxu.1	11	+	63591749	63595186	1	63591749,	63595186,	AK092098	proteinID=;alignID=uc001nxu.1;kgID=uc001nxu.1;mRNA=AK092098;spID=;refseq=;protAcc=;description=Homo sapiens cDNA FLJ34174 fis, clone FCBBF3015870.;rfamAcc=;tRnaName=;	UCSC_1648_3437		Antisense	UCSC	3437
p5953	0.34911	0.0304542	2.60285	up	4.6638	3.6203	3.48794	5.6439	5.30494	4.96348	0	GACATAAATGTGATAAAATGTTGACACTGTTTCTATTATAGCTGTAGGTGTGTGCACAGT	ENST00000501520.1	16	-	28296205	28303385	2	28296205,28303087,	28298388,28303385,	ENSG00000246465.1	gene_id "ENSG00000246465.1"; transcript_id "ENST00000501520.1"; gene_type "lincRNA"; gene_status "NOVEL"; gene_name "RP11-57A19.2"; transcript_type "lincRNA"; transcript_status "KNOWN"; transcript_name "RP11-57A19.2-001"; level 1; tag "basic"; tag "exp_conf"; havana_gene "OTTHUMG00000166065.1"; havana_transcript "OTTHUMT00000387676.1";	ENST00000501520;uc002dpc.1;UCSC_3317_2481;TCONS_00024265;XLOC_011907		Intergenic	ENSEMBL	2481
p25868	0.346721	0.00562407	2.38302	up	5.63055	5.04159	5.39015	6.76849	6.75654	6.29562	0	CATCTTTCCCAAAGGGCACTGCCTTGAGATCATCCTTCTCAAATAAAAAGAATGCATTTG	uc001uyq.1	13	+	42813345	42817026	1	42813345,	42817026,	AK054970	proteinID=;alignID=uc001uyq.1;kgID=uc001uyq.1;mRNA=AK054970;spID=;refseq=;protAcc=;description=Homo sapiens cDNA FLJ30408 fis, clone BRACE2008604.;rfamAcc=;tRnaName=;	UCSC_1332_3681		Intergenic	UCSC	3681
p5681	0.34911	0.0326201	3.19406	up	3.87786	4.16619	4.01206	5.79428	6.53249	4.75553	0	CAATGAGGAGACTGAGTCCCAAGATCACCCAGATACAATAATAATTGTAGTATTAACATA	ENST00000560265.1	15	+	77938699	77940543	3	77938699,77940180,77940485,	77938853,77940303,77940543,	ENSG00000259666.1	gene_id "ENSG00000259666.1"; transcript_id "ENST00000560265.1"; gene_type "antisense"; gene_status "NOVEL"; gene_name "RP11-307C19.3"; transcript_type "antisense"; transcript_status "KNOWN"; transcript_name "RP11-307C19.3-003"; level 2; tag "basic"; havana_gene "OTTHUMG00000172626.1"; havana_transcript "OTTHUMT00000419534.1";	ENST00000560265.1		Antisense	ENSEMBL	335
p4650	0.346721	0.0158037	2.00401	up	6.22746	5.76438	5.45256	6.61075	6.87489	6.96744	0	GTCCAGCATCTGGTGCACTTAACAATAGAGAATATATTAAACTCTTTCCAAAATAACCTG	ENST00000554169.1	14	-	95998970	96000582	2	95998970,96000029,	95999398,96000582,	ENSG00000247092.2	gene_id "ENSG00000247092.2"; transcript_id "ENST00000554169.1"; gene_type "antisense"; gene_status "KNOWN"; gene_name "SNHG10"; transcript_type "antisense"; transcript_status "KNOWN"; transcript_name "SNHG10-002"; level 2; tag "basic"; havana_gene "OTTHUMG00000171635.1"; havana_transcript "OTTHUMT00000414546.1";	ENST00000554169.1	SNHG10	Antisense	ENSEMBL	981
p20714	0.353986	0.0474362	2.97405	up	6.35543	6.7704	6.71016	8.05606	9.17854	7.31867	0	AACGATAGGTACTATTTCGTGTAAGGCAAAGTCCTTTGAAAGGGCTCCTAGAGCGTCAAG	TCONS_00026788	19	+	37264056	37266689	2	37264056,37266287,	37264211,37266689,	XLOC_013060	Gene_id=XLOC_013060;Gene_name=linc-ZNF345-1;Transcript_id=TCONS_00026788;Transcript_name=linc-ZNF345-1;	uc002oes.1;UCSC_10857_557;XLOC_013060		Divergent	HumanLincRNACatalog	557
p17991	0.346721	0.00923954	2.03755	up	4.24751	4.16227	4.83524	5.4439	5.53202	5.3496	0	ATAGTTGTTAAACCATCTTGCAAACTCATTGCCTGATGTTCAGATCTCCCGGCTCAGCTG	TCONS_00017747	10	-	99178540	99185802	4	99178540,99184557,99185430,99185779,	99179252,99184650,99185496,99185802,	XLOC_008916	Gene_id=XLOC_008916;Gene_name=linc-RRP12-1;Transcript_id=TCONS_00017747;Transcript_name=linc-RRP12-1;	XLOC_008916		Divergent	HumanLincRNACatalog	894
p23938	0.353986	0.0475832	3.76872	up	4.09921	3.0244	3.49756	5.62553	6.40093	4.33692	0	CCGCTTAGTATTCTTATCTCTCAAGGTTTTTGCTAATAATAATTTCTGTTACGCCTCAAC	TCONS_00014557	8	-	30044816	30047775	2	30044816,30047331,	30046339,30047775,	XLOC_007043	Gene_id=XLOC_007043;Gene_name=linc-MBOAT4-1;Transcript_id=TCONS_00014557;Transcript_name=linc-MBOAT4-1;	XLOC_007043		Intergenic	HumanLincRNACatalog	1967
p33819	0.353608	0.0452109	2.50516	up	5.06317	5.50098	4.5653	6.35977	7.01842	5.72598	0	GCATTCATGTAATCTGAGACTCTTGAACTTTATGACGGAGTCTTCAGTATTTTGATGTAT	uc021ygv.1	5	-	158584416	158587340	1	158584416,	158587340,	DKFZp686M11215	proteinID=;alignID=uc021ygv.1;kgID=uc021ygv.1;mRNA=AK126290;spID=;refseq=;protAcc=;description=Homo sapiens cDNA FLJ44310 fis, clone TRACH2025749.;rfamAcc=;tRnaName=;	uc021ygv.1		Antisense	UCSC	2924
p15203	0.328765	0.000168834	2.55972	up	4.28642	4.34572	4.04454	5.6319	5.50709	5.60565	0	TGTGGAACTGGATTGAATTAAACAAGACGTGCAAAGCAAGTGGTTCACGAGGTAGTGTGG	ENST00000524978.1	7	+	1609869	1615607	3	1609869,1614350,1615422,	1609915,1614499,1615607,	ENSG00000230487.3	gene_id "ENSG00000230487.3"; transcript_id "ENST00000524978.1"; gene_type "lincRNA"; gene_status "NOVEL"; gene_name "PSMG3-AS1"; transcript_type "lincRNA"; transcript_status "KNOWN"; transcript_name "PSMG3-AS1-007"; level 2; havana_gene "OTTHUMG00000151452.2"; havana_transcript "OTTHUMT00000388798.1";	ENST00000524978.1	PSMG3-AS1	Intergenic	ENSEMBL	380
RNA33785|snoRNA_scaRNA_381_64	0.346721	0.00233558	2.04877	up	5.80808	5.59147	5.87676	7.01324	6.78082	6.58653	0	ATGATGATTTCACAGACTAGAGTCTCCGATGCTGGTCATGATGTCAAAACTAAGTTCTGA	RNA33785|snoRNA_scaRNA_381_64													ftp://ftp.ensembl.org/pub/current/fasta/homo_sapiens/ncrna/Homo_sapiens.GRCh37.61.ncrna.fa.gz	NA
p4596	0.346721	0.004335	2.58265	up	4.45785	3.9835	4.20234	5.52342	5.9402	5.28662	0	AATGCTTACTGAGCCTGACTCCTTGTAAGTGACCAAGGATACAGCGATGAGAAATGCACA	ENST00000556368.1	14	-	77240626	77247861	2	77240626,77247742,	77241256,77247861,	ENSG00000259081.1	gene_id "ENSG00000259081.1"; transcript_id "ENST00000556368.1"; gene_type "antisense"; gene_status "NOVEL"; gene_name "RP11-488C13.6"; transcript_type "antisense"; transcript_status "KNOWN"; transcript_name "RP11-488C13.6-001"; level 2; tag "basic"; havana_gene "OTTHUMG00000171621.1"; havana_transcript "OTTHUMT00000414488.1";	ENST00000556368.1		Antisense	ENSEMBL	749
p13921	0.351166	0.0403639	3.40597	up	3.87175	4.83848	5.10024	6.6185	7.01294	5.48322	0	TGGACATCAACCGGGAAGAGCTGAAAGATGGCGTTACCAGAACAACTTCCAGTAAAAGAA	ENST00000510311.1	5	+	141704857	141843619	4	141704857,141724980,141732790,141843534,	141704935,141725050,141733148,141843619,	ENSG00000231185.2	gene_id "ENSG00000231185.2"; transcript_id "ENST00000510311.1"; gene_type "processed_transcript"; gene_status "NOVEL"; gene_name "AC005592.2"; transcript_type "processed_transcript"; transcript_status "KNOWN"; transcript_name "AC005592.2-004"; level 2; tag "basic"; havana_gene "OTTHUMG00000133693.3"; havana_transcript "OTTHUMT00000370676.1";	ENST00000510311.1		Divergent	ENSEMBL	591
p6778	0.350581	0.0360584	2.34738	up	5.69734	5.79173	5.33136	6.82679	7.48563	6.20117	0	CAGGAGTGCCTTAAACCTAATTTGAGACAGGAGTGGTAATATTTGGAACTCTGAAACTAA	ENST00000585212.1	17	-	29108510	29109239	2	29108510,29109009,	29108588,29109239,	ENSG00000265791.1	gene_id "ENSG00000265791.1"; transcript_id "ENST00000585212.1"; gene_type "sense_intronic"; gene_status "NOVEL"; gene_name "CTD-2349P21.10"; transcript_type "sense_intronic"; transcript_status "KNOWN"; transcript_name "CTD-2349P21.10-001"; level 2; tag "basic"; havana_gene "OTTHUMG00000179006.1"; havana_transcript "OTTHUMT00000444359.1";	ENST00000585212.1	CTD-2349P21.10	Sense	ENSEMBL	308
p13304	0.346721	0.00170989	2.59295	up	3.44469	3.26607	3.74064	5.06776	4.8588	4.64861	0	TTTTAGAAGGCTTTACCAAGAATGTGGAATTACACTATGGCTTTAAGAATTTGGCCAGAA	ENST00000502437.1	5	-	95549049	95550779	2	95549049,95550571,	95549493,95550779,	ENSG00000249746.1	gene_id "ENSG00000249746.1"; transcript_id "ENST00000502437.1"; gene_type "lincRNA"; gene_status "NOVEL"; gene_name "RP11-254I22.3"; transcript_type "lincRNA"; transcript_status "KNOWN"; transcript_name "RP11-254I22.3-001"; level 1; tag "basic"; tag "exp_conf"; havana_gene "OTTHUMG00000162820.1"; havana_transcript "OTTHUMT00000370532.1";	TCONS_00009731;XLOC_004933		Intergenic	ENSEMBL	652
p18609	0.35077	0.0395465	6.26565	up	4.7495	4.60355	5.64663	8.29748	8.62024	6.02434	0	TGGTGACAACAGATTAAAAATGGCCTATGTCTCAAGTTGAAGGTCCTGTTTTTCTGCTCT	TCONS_00020758	12	-	34369804	34372111	3	34369804,34371595,34372060,	34370132,34371780,34372111,	XLOC_010049	Gene_id=XLOC_010049;Gene_name=linc-SYT10-2;Transcript_id=TCONS_00020758;Transcript_name=linc-SYT10-2;	XLOC_010049		Intergenic	HumanLincRNACatalog	564
p5570	0.348944	0.0258889	3.76264	up	6.5008	5.00244	5.96932	8.27077	7.82327	7.11376	0	CTAAATCAATATCATCCGTTGGTATATCCTGGATTTGAAACAGCTCTGAATACTGATCCT	ENST00000561007.1	15	+	51706293	51791030	6	51706293,51740654,51746271,51758386,51758692,51790964,	51706397,51740811,51746336,51758520,51758726,51791030,	ENSG00000259678.1	gene_id "ENSG00000259678.1"; transcript_id "ENST00000561007.1"; gene_type "antisense"; gene_status "NOVEL"; gene_name "RP11-707P17.1"; transcript_type "antisense"; transcript_status "KNOWN"; transcript_name "RP11-707P17.1-001"; level 2; tag "basic"; havana_gene "OTTHUMG00000172524.1"; havana_transcript "OTTHUMT00000418934.1";	ENST00000561007.1		Antisense	ENSEMBL	560
p25324	0.346721	0.0166555	5.26254	up	3.3701	2.74142	2.46285	6.09559	5.42448	4.24157	0	AAATTGGTGGTTATGATCACGTTTATGTGGCTTAAGCGTCAAGCGGATCAAAGGGCGTGA	XR_132507.1	5	-	1054089	1055690	1	1054089,	1055690,	LOC100506766	ID=rna11563;Name=XR_132507.1;Parent=gene9521;Dbxref=GeneID:100506766,Genbank:XR_132507.1;gbkey=misc_RNA;product=uncharacterized LOC100506766;transcript_id=XR_132507.1|ID=gene9521;Name=LOC100506766;Dbxref=GeneID:100506766;gbkey=Gene;gene=LOC100506766	XR_132507.1		Intronic	RefSeq	1601
p23426	0.351166	0.0406067	2.45089	up	9.29808	8.08305	7.98493	9.78371	9.89798	9.56428	0	GCTTCTCTAGGTGAAGGTTTAAATTAACTTCAGCATGGGTAAAACTATTCTTTCCTTCTT	TCONS_00012453	6	+	30259313	30271912	2	30259313,30271882,	30260239,30271912,	XLOC_005238	Gene_id=XLOC_005238;Gene_name=linc-TRIM39-1;Transcript_id=TCONS_00012453;Transcript_name=linc-TRIM39-1;	XLOC_005238		Intergenic	HumanLincRNACatalog	956
p38448_v4	0.34911	0.0317605	3.00049	up	2.10661	2.87121	2.68409	4.60305	4.53902	3.27544	0	CCCAGTTCATGAACACGTGAAGCCTTGACTTCAGGTTAAGTAATAAAAATTTATTGAGAA	ENST00000606539.1	12	+	7074111	7074545	1	7074111,	7074545,	ENSG00000271969.1	gene_id "ENSG00000271969.1"; transcript_id "ENST00000606539.1"; gene_type "antisense"; gene_status "KNOWN"; gene_name "U47924.29"; transcript_type "antisense"; transcript_status "KNOWN"; transcript_name "U47924.29-001"; level 2; tag "basic"; havana_gene "OTTHUMG00000185704.1"; havana_transcript "OTTHUMT00000471026.1";			Antisense	ENSEMBL	434
p7053	0.346924	0.0192483	3.00531	up	3.47575	3.76234	4.3862	5.33605	6.07069	4.98009	0	TAGCCGTCCTGAATCTACCACTGTTCAGTAATTTACAGTTCAAACCGGATTGTGCCAGCT	ENST00000589963.1	17	-	74541749	74553734	3	74541749,74546943,74553705,	74541996,74547245,74553734,	ENSG00000267546.1	gene_id "ENSG00000267546.1"; transcript_id "ENST00000589963.1"; gene_type "antisense"; gene_status "NOVEL"; gene_name "RP11-666A8.8"; transcript_type "antisense"; transcript_status "KNOWN"; transcript_name "RP11-666A8.8-001"; level 2; tag "basic"; havana_gene "OTTHUMG00000180290.1"; havana_transcript "OTTHUMT00000450606.1";	ENST00000589963.1		Antisense	ENSEMBL	578
p10708	0.353608	0.0459154	2.25559	up	5.13373	4.6234	4.36119	5.98041	6.4149	5.24354	0	CCTTTTTCCTTATTTCCTTCAGATCCTTTTGTGTTTAAATAAAGGAAAAGCTGCACATCC	ENST00000567517.1	21	-	26955081	26955638	1	26955081,	26955638,	ENSG00000260583.1	gene_id "ENSG00000260583.1"; transcript_id "ENST00000567517.1"; gene_type "antisense"; gene_status "NOVEL"; gene_name "LINC00515"; transcript_type "antisense"; transcript_status "KNOWN"; transcript_name "LINC00515-001"; level 2; tag "basic"; havana_gene "OTTHUMG00000172769.1"; havana_transcript "OTTHUMT00000420390.1";	NR_024092;RefSeq_3342_450	LINC00515	Antisense	ENSEMBL	557
p18209	0.346721	0.00403425	2.56427	up	4.04867	4.13401	4.05979	5.61878	5.71128	4.98805	0	GATTGCCTTTATAGAGACTAAAATGTTAACATTGAAGATTCATGGATGAACCTAGATTTG	TCONS_00018817	10	+	112779677	112782449	2	112779677,112782245,	112779747,112782449,	XLOC_008614	Gene_id=XLOC_008614;Gene_name=linc-ADRA2A-1;Transcript_id=TCONS_00018817;Transcript_name=linc-ADRA2A-1;	XLOC_008614		Intergenic	HumanLincRNACatalog	274
p43305_v4	0.346745	0.0176766	2.89239	up	3.71084	3.26807	4.29933	5.35708	5.69987	4.81807	0	TCTCCACTATGAATTCTATGATGTCGAATAAAGTGTGAGCTCTGATTACAAGTCTTTGAA	XR_243583.2	17	+	5015230	5017692	3	5015230,5016680,5017452,	5015413,5016747,5017692,	none					RefSeq	490
RNA147032|p0136_imsncRNA216	0.350581	0.0371534	2.90331	up	5.40071	5.10808	5.12634	6.68844	7.62906	5.93071	0	TACTCAGCCCATATCCAAGTTTTCTGGAATATCTCAGAAATGCCTGTCCCATTGGGCTGT	RNA147032|p0136_imsncRNA216													unpublished data	NA
p26877	0.353877	0.0472871	14.3912	up	3.40582	2.72691	4.55407	8.14081	9.11369	4.97364	0	GCTTTCCCTAATTTGTGATGAGTGAAACACTGAACAGAGACATAGAATAATATTCTGTAG	HIT000067334	6	+	22195581	22196025	1	22195581,	22196025,	HIX0021914	None	H-InvDB_938_455		Intergenic	H-InvDB	444
p6605	0.346721	0.0118867	2.8428	up	7.1332	7.8451	7.67907	9.27618	9.37776	8.52537	0	TGATCCTTTGTGCAGCGGCTGCTGGCCTCTCAAACTTAATGTGTTCATTGCGGAACTTGC	ENST00000562866.1	16	+	89778263	89784573	4	89778263,89779096,89782878,89783751,	89778630,89779226,89783312,89784573,	ENSG00000261373.1	gene_id "ENSG00000261373.1"; transcript_id "ENST00000562866.1"; gene_type "antisense"; gene_status "NOVEL"; gene_name "RP11-368I7.2"; transcript_type "antisense"; transcript_status "KNOWN"; transcript_name "RP11-368I7.2-001"; level 2; tag "basic"; havana_gene "OTTHUMG00000173220.1"; havana_transcript "OTTHUMT00000422513.1";	NR_036480;RefSeq_1987_1753		Antisense	ENSEMBL	1753
p43432_v4	0.34911	0.0320077	2.20299	up	4.30415	3.49023	3.65212	5.45237	4.75514	4.65736	0	TTATGTGGGCTTTTCCATGGGAAGAACCACTCTACGTTATCACCTTCTACATAGTAGCAG	XR_243745.1	17	-	65671276	65686987	2	65671276,65685386,	65671739,65686987,	none					RefSeq	2064
p1265	0.346721	0.0137536	2.83936	up	9.99221	9.58234	8.99383	11.3139	10.6146	11.1566	0	CGGTACGAGTATCCTCAGCAAGATTCAGAAGCAAATAAAGAGCAACTAGAAAAGTAAAAT	ENST00000440321.1	1	+	169993217	169993824	2	169993217,169993690,	169993424,169993824,	ENSG00000232959.1	gene_id "ENSG00000232959.1"; transcript_id "ENST00000440321.1"; gene_type "antisense"; gene_status "PUTATIVE"; gene_name "RP11-332H17.1"; transcript_type "antisense"; transcript_status "PUTATIVE"; transcript_name "RP11-332H17.1-001"; level 2; tag "basic"; havana_gene "OTTHUMG00000035956.1"; havana_transcript "OTTHUMT00000087583.1";	ENST00000440321.1		Antisense	ENSEMBL	341
p35291_v4	0.350581	0.0356227	6.13013	up	2.22318	2.12401	2.55786	5.38974	6.0577	3.30536	0	GGACCTGGACAGGAATAAGCAGAGCATGCTGATTTAAAATTATGGAAATTCTTCAGGCAG	ENST00000442094.1	6	+	147997210	148058692	3	147997210,148054864,148058452,	147997291,148054947,148058692,	ENSG00000227681.1	gene_id "ENSG00000227681.1"; transcript_id "ENST00000442094.1"; gene_type "lincRNA"; gene_status "NOVEL"; gene_name "RP11-307P5.1"; transcript_type "lincRNA"; transcript_status "KNOWN"; transcript_name "RP11-307P5.1-002"; level 2; havana_gene "OTTHUMG00000015769.1"; havana_transcript "OTTHUMT00000042613.1";	ENCODE_2383_404		Intergenic	ENSEMBL	404
p6082	0.34911	0.0320224	2.52339	up	3.58469	3.72102	3.7111	5.20675	5.59926	4.21689	0	ATATGGTTCAACTTATCCGCACTTTGTCCAGTAGGTCACATGATAGGAGATGGCAGTCTC	ENST00000569654.1	16	-	68607684	68623415	2	68607684,68623310,	68608126,68623415,	ENSG00000260084.1	gene_id "ENSG00000260084.1"; transcript_id "ENST00000569654.1"; gene_type "antisense"; gene_status "NOVEL"; gene_name "RP11-615I2.1"; transcript_type "antisense"; transcript_status "KNOWN"; transcript_name "RP11-615I2.1-001"; level 2; tag "basic"; havana_gene "OTTHUMG00000176784.1"; havana_transcript "OTTHUMT00000433747.1";	ENST00000569654.1		Antisense	ENSEMBL	547
p25530	0.346721	0.00863629	2.44205	up	3.23854	3.16734	3.05847	4.50006	4.86726	3.9613	0	AATCATGGCAACAGGACTTTTAGAAGCACGTCCTCTGAAAGCCATTTTCTGCCTGTGGTT	NR_038207.1	8	+	96281063	96822371	3	96281063,96444853,96822246,	96281118,96445008,96822371,	LOC100616530	ID=rna19045;Name=NR_038207.1;Parent=gene16109;Dbxref=GeneID:100616530,Genbank:NR_038207.1;gbkey=misc_RNA;product=tospeak%2C transcript variant 7;transcript_id=NR_038207.1|ID=gene16109;Name=LOC100616530;Dbxref=GeneID:100616530;description=tospeak;gbkey=Gene;gene=LOC100616530	UCSC:uc022ayu.1		Antisense	RefSeq	335
RNA95658|RNS_740_131	0.351166	0.040975	3.65236	up	3.33634	3.92872	3.13608	5.99308	5.83835	4.17621	0	TTTAGGCCAGTCCCTTGGGCTTTTCAGGCAGGCCCTTATGGTGGCCGGCCAGTTTGGGAC	RNA95658|RNS_740_131													http://research.imb.uq.edu.au/rnadb/NoncodingRNASearchV2.zip	NA
p23310	0.34911	0.0286028	2.17826	up	4.40305	3.94416	4.61171	5.32229	5.96131	5.04485	0	CTTGGCGTTTAAGTGCTGATGAAGCAGGTCAGTCAAAACTGAAGATCAGCTTTTGATCAT	TCONS_00012356	6	-	165218446	165241153	3	165218446,165219184,165241066,	165218582,165219218,165241153,	XLOC_005915	Gene_id=XLOC_005915;Gene_name=linc-PARK2-4;Transcript_id=TCONS_00012356;Transcript_name=linc-PARK2-4;	XLOC_005915		Intergenic	HumanLincRNACatalog	257
p20403	0.346721	0.00307137	2.05102	up	3.15092	3.2616	3.2918	4.48371	4.36334	3.9663	0	CTTTCAGATATTATAAGAGAAGAGAACCAAAATGTTGTCTCTGGTGTCTAGAATTTCAGG	TCONS_00026475	18	-	29065356	29076959	2	29065356,29076933,	29065747,29076959,	XLOC_012803	Gene_id=XLOC_012803;Gene_name=linc-DSC1-3;Transcript_id=TCONS_00026475;Transcript_name=linc-DSC1-3;	XLOC_012803		Intergenic	HumanLincRNACatalog	417
p15574	0.34911	0.0310088	5.16057	up	2.7462	2.53005	3.07259	5.28624	6.30385	3.86135	0	CCAGGAGTTATTATCTCCTGGATTATCTGCCAAAGAAATTATCTGCCAAAATTACAATGT	ENST00000525186.1	8	-	6492362	6565700	3	6492362,6527509,6565661,	6492940,6527761,6565700,	ENSG00000249898.3	gene_id "ENSG00000249898.3"; transcript_id "ENST00000525186.1"; gene_type "antisense"; gene_status "NOVEL"; gene_name "CTD-2541M15.1"; transcript_type "antisense"; transcript_status "KNOWN"; transcript_name "CTD-2541M15.1-003"; level 2; tag "basic"; havana_gene "OTTHUMG00000163619.3"; havana_transcript "OTTHUMT00000381877.1";	ENST00000525186.1	CTD-2541M15.1	Antisense	ENSEMBL	869
p19626	0.348944	0.0236881	4.33134	up	2.33806	2.71732	3.25975	5.06612	5.70379	3.88966	0	AACTTGGAGCTGTTGTTTTCTACCAGACACTAGGATCCCTGAGAGAGGTGTCATTCTTTC	TCONS_00024186	15	-	80690250	80696189	3	80690250,80695843,80696050,	80690348,80695927,80696189,	XLOC_011546	Gene_id=XLOC_011546;Gene_name=linc-BCL2A1-3;Transcript_id=TCONS_00024186;Transcript_name=linc-BCL2A1-3;	XLOC_011546		Divergent	HumanLincRNACatalog	321
p39568_v4	0.348733	0.0218937	2.29748	up	3.76985	3.60052	3.64918	5.21184	5.18542	4.22244	0	CAGAAGCAGCTTCATTTAAAAGAAATAAAATTTCTAGTCCTGCCTGAAGTTTAAGCTAGC	XR_426908.1	1	+	222988341	223010375	4	222988341,222997225,223008460,223010337,	222988420,222997287,223008557,223010375,	none					RefSeq	276
p63	0.35077	0.0389756	2.66074	up	2.94555	2.22548	3.1924	3.81768	4.93073	3.85051	0	AGAAAGTCCACATCAACTGATTTCATTACACCTGTTACATTTCAATACACTCCAGGGAAA	ENST00000602916.1	1	-	7760763	7761030	1	7760763,	7761030,	ENSG00000269978.1	gene_id "ENSG00000269978.1"; transcript_id "ENST00000602916.1"; gene_type "lincRNA"; gene_status "NOVEL"; gene_name "RP11-338N10.3"; transcript_type "lincRNA"; transcript_status "KNOWN"; transcript_name "RP11-338N10.3-001"; level 2; tag "basic"; havana_gene "OTTHUMG00000183919.1"; havana_transcript "OTTHUMT00000467519.1";	ENST00000602916.1		Intergenic	ENSEMBL	267
p11735	0.35077	0.0396597	4.25762	up	3.07575	2.28893	3.07004	5.60221	5.48735	3.6153	0	TGCTCTTCTCATGGGAGACATTAAATAAGCTTTGAATTAACTGAGACCTCTGTGGATTCT	ENST00000593741.1	3	+	18505821	18571886	6	18505821,18507454,18515203,18567878,18568665,18571472,	18505831,18507531,18515350,18568032,18568818,18571886,	ENSG00000228956.3	gene_id "ENSG00000228956.3"; transcript_id "ENST00000593741.1"; gene_type "processed_transcript"; gene_status "NOVEL"; gene_name "AC144521.1"; transcript_type "antisense"; transcript_status "KNOWN"; transcript_name "AC144521.1-003"; level 2; tag "basic"; havana_gene "OTTHUMG00000155346.5"; havana_transcript "OTTHUMT00000339552.3";	ENST00000593741.1		Antisense	ENSEMBL	955
p15976	0.346924	0.0186651	2.48443	up	3.65335	3.44871	3.29719	5.11776	4.12512	5.09511	0	GGATCCTGCTACCAGGTTATGATAGATTTTATGGTATGTCTCAAGATATTGAGATAAAGG	ENST00000517833.1	8	-	144063154	144099807	2	144063154,144099576,	144063918,144099807,	ENSG00000247317.3	gene_id "ENSG00000247317.3"; transcript_id "ENST00000517833.1"; gene_type "processed_transcript"; gene_status "NOVEL"; gene_name "RP11-273G15.2"; transcript_type "processed_transcript"; transcript_status "PUTATIVE"; transcript_name "RP11-273G15.2-003"; level 2; havana_gene "OTTHUMG00000164752.1"; havana_transcript "OTTHUMT00000380063.1";	ENST00000517833.1		Divergent	ENSEMBL	995
p41610_v4	0.346721	0.000745537	2.45222	up	10.0429	9.81866	10.2888	11.3807	11.2827	11.3692	0	ATAGGAGAAATATTTCCTGGTTAAGTGGAAAATTGTGCGGATGTGGCTTTTTGAAAAACT	XR_428390.1	8	+	93364036	93384471	3	93364036,93373951,93384461,	93364080,93373958,93384471,	none					RefSeq	61
p29010	0.348944	0.0231714	7.69672	up	4.25131	3.17787	4.61043	6.92919	8.1853	5.75785	0	AGCTCAGAGGAATGAGGACATTCCAACAGGGTATCAGAATTCTCTTTTGTTTATGCTAAT	ENST00000436383.1	10	+	6821559	6884868	5	6821559,6823265,6875604,6879935,6882352,	6821849,6823448,6875650,6879970,6884868,	ENSG00000238266.1	gene_id "ENSG00000238266.1"; transcript_id "ENST00000436383.1"; gene_type "processed_transcript"; gene_status "NOVEL"; gene_name "LINC00707"; transcript_type "processed_transcript"; transcript_status "KNOWN"; transcript_name "LINC00707-001"; level 2; tag "basic"; havana_gene "OTTHUMG00000017627.1"; havana_transcript "OTTHUMT00000046670.1";	ENCODE_80_3070;TCONS_00017700;XLOC_008374	LINC00707	Intergenic	ENSEMBL	3070
p18075	0.346721	0.00878844	2.37452	up	2.89804	3.68873	3.51373	4.50232	4.821	4.52009	0	CCCATCAAGACAGCAAGAAATGTCCAGCTGGCAGCATTTGCCCCTGTCTGATCATTAAAT	TCONS_00018120	10	+	8083980	8084832	2	8083980,8084671,	8084088,8084832,	XLOC_008380	Gene_id=XLOC_008380;Gene_name=linc-GATA3-2;Transcript_id=TCONS_00018120;Transcript_name=linc-GATA3-2;	XLOC_008380		Intergenic	HumanLincRNACatalog	269
p8481	0.351166	0.0404761	3.09533	up	3.61031	2.8948	3.44232	4.93962	5.81721	4.08088	0	GCAGACCTATGTGTCACTCATAACTGAAATTCAAATAAATATTTTGTGGATTTCCTGTGG	ENST00000594816.1	19	-	58939998	58942515	1	58939998,	58942515,	ENSG00000268912.1	gene_id "ENSG00000268912.1"; transcript_id "ENST00000594816.1"; gene_type "lincRNA"; gene_status "NOVEL"; gene_name "CTD-2619J13.17"; transcript_type "lincRNA"; transcript_status "KNOWN"; transcript_name "CTD-2619J13.17-001"; level 2; tag "basic"; havana_gene "OTTHUMG00000183536.1"; havana_transcript "OTTHUMT00000467034.1";	ENST00000594816.1	CTD-2619J13.17	Intergenic	ENSEMBL	2517
p5006	0.353305	0.0447167	2.05526	up	7.16444	6.41661	7.05489	7.67067	8.46581	7.61744	0	ATGACACTTTGTCGATGAAGATCTTGATTGTGACCTCTGTGGAAAATGAGCCATGAACCA	ENST00000553421.1	14	+	101379720	101381309	2	101379720,101381008,	101379858,101381309,	ENSG00000258399.1	gene_id "ENSG00000258399.1"; transcript_id "ENST00000553421.1"; gene_type "lincRNA"; gene_status "NOVEL"; gene_name "MEG8"; transcript_type "lincRNA"; transcript_status "KNOWN"; transcript_name "MEG8-006"; level 2; havana_gene "OTTHUMG00000171625.1"; havana_transcript "OTTHUMT00000414504.1";	LIT1343;CombinedLit_511_90;LIT1745;CombinedLit_423_312	MEG8	Intergenic	ENSEMBL	439
p38105_v4	0.350287	0.0344429	6.83431	up	2.66791	2.461	1.88009	5.67634	6.20873	3.44232	0	CTTTTGTAACTTAAAACGAGTTCTGTTGTTTATCATATAAAATGAATGCTTTTTTCCCAA	ENST00000605049.1	8	+	53635462	53635701	1	53635462,	53635701,	ENSG00000271555.1	gene_id "ENSG00000271555.1"; transcript_id "ENST00000605049.1"; gene_type "sense_intronic"; gene_status "NOVEL"; gene_name "CTD-3214K23.1"; transcript_type "sense_intronic"; transcript_status "KNOWN"; transcript_name "CTD-3214K23.1-001"; level 2; tag "basic"; havana_gene "OTTHUMG00000185152.1"; havana_transcript "OTTHUMT00000469670.1";			Sense	ENSEMBL	239
p36559_v4	0.353608	0.0454035	2.20326	up	11.0056	11.2266	10.8713	12.245	12.7995	11.478	0	AACTACTAGGATCACGCGGCATGTATTGAGCATATAGGTTGCTGTAGATGAATGTTCTTA	ENST00000520619.1	8	-	67834252	67838633	4	67834252,67834558,67834848,67838432,	67834349,67834627,67834960,67838633,	ENSG00000245910.3	gene_id "ENSG00000245910.3"; transcript_id "ENST00000520619.1"; gene_type "processed_transcript"; gene_status "KNOWN"; gene_name "SNHG6"; transcript_type "lincRNA"; transcript_status "KNOWN"; transcript_name "SNHG6-004"; level 2; havana_gene "OTTHUMG00000164743.3"; havana_transcript "OTTHUMT00000380025.1";	ENST00000520619.1	SNHG6	Intergenic	ENSEMBL	479
p17128	0.352697	0.0437374	2.28195	up	4.78383	3.59098	4.15902	5.64226	5.53127	4.93109	0	AAGTCACCTGGTTTAAAGACAAAACGAGATACGTCCGTCAGACAGAAGAGGAGACAGACA	ENST00000602357.1	X	+	1522402	1532917	3	1522402,1531683,1532656,	1522478,1531781,1532917,	ENSG00000236017.3	gene_id "ENSG00000236017.3"; transcript_id "ENST00000602357.1"; gene_type "antisense"; gene_status "KNOWN"; gene_name "ASMTL-AS1"; transcript_type "antisense"; transcript_status "KNOWN"; transcript_name "ASMTL-AS1-005"; level 2; tag "basic"; havana_gene "OTTHUMG00000021056.3"; havana_transcript "OTTHUMT00000468107.1";	ENST00000602357.1	ASMTL-AS1	Antisense	ENSEMBL	435
p15301	0.346721	0.00538538	3.19802	up	2.97184	3.20422	3.67228	4.54807	5.32747	5.00434	0	CTGCTCGTGTGCACATACATAATAACCTTCACAGATCCTAAGGTAAACGTTCCTTGCAGG	ENST00000436594.1	7	+	28997282	28998961	2	28997282,28998565,	28997474,28998961,	ENSG00000228421.2	gene_id "ENSG00000228421.2"; transcript_id "ENST00000436594.1"; gene_type "lincRNA"; gene_status "NOVEL"; gene_name "AC005013.5"; transcript_type "lincRNA"; transcript_status "KNOWN"; transcript_name "AC005013.5-001"; level 1; tag "basic"; tag "exp_conf"; havana_gene "OTTHUMG00000152794.3"; havana_transcript "OTTHUMT00000327953.3";	ENST00000436594.1		Intergenic	ENSEMBL	588
p34483_v4	0.346721	0.0128543	4.08829	up	8.08579	8.17242	7.94126	10.3381	10.7648	9.19103	0	GATGCCACTGGAAATGTTGAAATGAAAAATATTCAGCCGTTGGTCTTTGAAATTTCCTGT	ENST00000560029.1	16	-	54952781	54954528	2	54952781,54954209,	54953121,54954528,	ENSG00000245694.4	gene_id "ENSG00000245694.4"; transcript_id "ENST00000560029.1"; gene_type "antisense"; gene_status "KNOWN"; gene_name "CRNDE"; transcript_type "antisense"; transcript_status "KNOWN"; transcript_name "CRNDE-010"; level 2; tag "basic"; havana_gene "OTTHUMG00000172236.2"; havana_transcript "OTTHUMT00000417432.1";	TCONS_00024270;XLOC_011950	CRNDE	Antisense	ENSEMBL	659
p17881	0.346721	0.0163933	3.27301	up	2.06319	2.14917	2.65736	4.08106	4.62813	3.29238	0	GGATTCAGTAACTTTACCTTGATTCTGTGGCCAGATTATTGCCAATTTTAAAAGGAAATG	TCONS_00001350	1	+	246846452	246855175	3	246846452,246853033,246854769,	246846487,246853516,246855175,	XLOC_000642	Gene_id=XLOC_000642;Gene_name=linc-SCCPDH-1;Transcript_id=TCONS_00001350;Transcript_name=linc-SCCPDH-1;	XLOC_000642		Intergenic	HumanLincRNACatalog	924
p15028	0.352697	0.0440486	3.14551	up	1.83417	2.58337	2.55286	4.69016	4.26231	2.9778	0	TAGTACTAATGGCCAGAAATGGCTACAGGACATGTCCTGCCTAAATATCATCTCCTGCAC	ENST00000468165.1	7	-	102067264	102075227	3	102067264,102070432,102075160,	102067589,102070581,102075227,	ENSG00000239480.1	gene_id "ENSG00000239480.1"; transcript_id "ENST00000468165.1"; gene_type "antisense"; gene_status "NOVEL"; gene_name "RP11-514P8.2"; transcript_type "antisense"; transcript_status "KNOWN"; transcript_name "RP11-514P8.2-001"; level 1; tag "basic"; tag "exp_conf"; havana_gene "OTTHUMG00000157724.1"; havana_transcript "OTTHUMT00000349518.1";	ENST00000468165.1		Antisense	ENSEMBL	541
p26172	0.346745	0.017868	3.79272	up	3.70401	3.60546	3.48627	5.81377	6.18943	4.56223	0	GAAGAAAGAAAAATATCACACAGACCTAGGTCCACAAATACCACATCTTACTATGAAGCT	uc002zis.1	21	+	47656137	47671743	3	47656137,47660747,47671462,	47656240,47660933,47671743,	MCM3AP-AS1	proteinID=;alignID=uc002zis.1;kgID=uc002zis.1;mRNA=BC016306;spID=;refseq=;protAcc=;description=Homo sapiens MCM3AP antisense RNA 1 (non-protein coding) (MCM3AP-AS1), antisense RNA.;rfamAcc=;tRnaName=;	UCSC_10811_570		Antisense	UCSC	570
p4560	0.346721	0.00160674	2.05125	up	4.60336	4.23967	4.6099	5.47263	5.64047	5.44935	0	CTCCCTGATGTAACATTTTAAATAAGGATACATTTCTCATCCAATGTGACATTATGCAGG	ENST00000554679.1	14	-	68591720	68596913	2	68591720,68596782,	68592126,68596913,	ENSG00000258837.1	gene_id "ENSG00000258837.1"; transcript_id "ENST00000554679.1"; gene_type "antisense"; gene_status "NOVEL"; gene_name "CTD-2566J3.1"; transcript_type "antisense"; transcript_status "KNOWN"; transcript_name "CTD-2566J3.1-001"; level 2; tag "basic"; havana_gene "OTTHUMG00000171756.1"; havana_transcript "OTTHUMT00000414980.1";	ENST00000554679.1	CTD-2566J3.1	Antisense	ENSEMBL	537
p17300	0.346721	0.0108936	4.08912	up	4.12713	2.9278	2.74557	5.07039	5.30572	5.51975	0	CCACTGCAGACTCATGAATGATTCACAGAAAAATAAAGAACACTGAGCAATACAGCCCAA	ENST00000430228.1	Y	-	9555261	9558905	2	9555261,9558703,	9555366,9558905,	ENSG00000228890.1	gene_id "ENSG00000228890.1"; transcript_id "ENST00000430228.1"; gene_type "lincRNA"; gene_status "KNOWN"; gene_name "TTTY21"; transcript_type "lincRNA"; transcript_status "KNOWN"; transcript_name "TTTY21-001"; level 2; tag "basic"; havana_gene "OTTHUMG00000046232.1"; havana_transcript "OTTHUMT00000106566.1";	NR_001535;RefSeq_3387_307;TCONS_00017587;XLOC_008320	TTTY21	Intergenic	ENSEMBL	307
p10790	0.351397	0.0421358	2.63526	up	3.42948	3.32347	3.60991	4.92793	5.62075	4.00801	0	AGATCGTTGCTCCATTTTAAAACAACAGCCTGTTTTGTGCAGATCAGCTTCATAGTAAGA	ENST00000430259.1	21	-	47671725	47674047	2	47671725,47672343,	47672035,47674047,	ENSG00000239415.1	gene_id "ENSG00000239415.1"; transcript_id "ENST00000430259.1"; gene_type "processed_transcript"; gene_status "NOVEL"; gene_name "AP001469.9"; transcript_type "processed_transcript"; transcript_status "KNOWN"; transcript_name "AP001469.9-002"; level 2; tag "basic"; havana_gene "OTTHUMG00000090631.1"; havana_transcript "OTTHUMT00000207264.1";	ENST00000430259.1	AP001469.9	Intronic	ENSEMBL	2014
p8614	0.354729	0.0495818	2.04099	up	2.27141	3.09121	3.27987	3.94103	4.24348	3.54578	0	TCAAGAAGAAAATTCGAAGAAAAGGTTTAGCAGGGACAGAGAAGCGACCTGTCCCGGAAA	ENST00000594805.1	19	+	18315539	18322038	2	18315539,18321894,	18315709,18322038,	ENSG00000268650.1	gene_id "ENSG00000268650.1"; transcript_id "ENST00000594805.1"; gene_type "processed_transcript"; gene_status "NOVEL"; gene_name "AC068499.10"; transcript_type "lincRNA"; transcript_status "KNOWN"; transcript_name "AC068499.10-001"; level 2; havana_gene "OTTHUMG00000183374.1"; havana_transcript "OTTHUMT00000466398.1";	ENST00000594805.1		Intergenic	ENSEMBL	314
p39740_v4	0.346721	0.0135272	2.09376	up	4.59457	4.67963	4.23501	5.49846	5.96843	5.24061	0	ATGTTCCTGCAGTAGAGCCTTTCATTTTGTCTCTGCGAAGTGGCAAAGCAGCTAGTATTG	XR_245014.2	2	-	66666229	66667646	2	66666229,66667356,	66666821,66667646,	none					RefSeq	882
p28239	0.346721	0.0165667	2.19951	up	3.23061	3.0247	3.30441	4.66336	4.52663	3.78128	0	TTATCAGTTCCCTTCTGGGCCAGAATGAGTAAACCTCAGGTATAGGGAGGTAAACACTAC	ASO3446	None	None	None	None	None	None	None	ASO3446	Accession=AY927592;Description=Homo sapiens mRNA sequence.	ASO3446		Intronic	RNAdb	1032
RNA147273|p0377_imsncRNA795	0.352697	0.0439569	2.18848	up	4.02824	4.16362	3.47389	5.07538	5.55426	4.42589	0	GTTCCTCTCACTGCTTGAAGCCTTAGGCAGTGGGATTTTGATCCATCATATATCAAAAAT	RNA147273|p0377_imsncRNA795								nc036					PubMed ID:21789175	NA
p8723	0.34911	0.032078	2.48931	up	5.93271	6.15162	6.13567	7.51888	8.01071	6.63766	0	CTGGCTGTGAGTATATGAGTCAGTTCTTACTCTCTGTATCTTTCTGTATAAACTATTTCA	ENST00000591976.1	19	+	37978900	37979554	1	37978900,	37979554,	ENSG00000267381.1	gene_id "ENSG00000267381.1"; transcript_id "ENST00000591976.1"; gene_type "lincRNA"; gene_status "NOVEL"; gene_name "CTD-2086O20.3"; transcript_type "lincRNA"; transcript_status "KNOWN"; transcript_name "CTD-2086O20.3-001"; level 2; tag "basic"; havana_gene "OTTHUMG00000181980.1"; havana_transcript "OTTHUMT00000458522.1";	ENST00000591976.1	CTD-2086O20.3	Intergenic	ENSEMBL	654
p38125_v4	0.348944	0.0230885	2.68081	up	5.53604	5.24635	4.82301	6.50292	7.26237	6.1081	0	TATCCATAAGTTTTAAGAAGAGATGCTATATATACGGTGGTCCCATTGATGTATAACTGT	ENST00000607706.1	8	-	94727605	94728341	1	94727605,	94728341,	ENSG00000271971.1	gene_id "ENSG00000271971.1"; transcript_id "ENST00000607706.1"; gene_type "antisense"; gene_status "NOVEL"; gene_name "CTD-2006H14.2"; transcript_type "antisense"; transcript_status "KNOWN"; transcript_name "CTD-2006H14.2-001"; level 2; tag "basic"; havana_gene "OTTHUMG00000185503.1"; havana_transcript "OTTHUMT00000470615.1";			Antisense	ENSEMBL	736
p16072	0.346721	0.0109464	7.34877	up	3.92688	5.22054	4.42477	6.60554	7.22185	8.37731	0	AAAGAAACTCCTGGTGTTCTCTGTAGCCTGATTTCATCTCTACTAAACGCTATTTTGAAA	ENST00000521141.1	8	+	22605015	22615705	4	22605015,22612323,22613240,22614476,	22605083,22612375,22613521,22615705,	ENSG00000253125.1	gene_id "ENSG00000253125.1"; transcript_id "ENST00000521141.1"; gene_type "processed_transcript"; gene_status "NOVEL"; gene_name "RP11-459E5.1"; transcript_type "antisense"; transcript_status "KNOWN"; transcript_name "RP11-459E5.1-003"; level 2; tag "basic"; havana_gene "OTTHUMG00000163751.1"; havana_transcript "OTTHUMT00000375192.1";	ENST00000521141.1		Antisense	ENSEMBL	1630
p6123	0.35077	0.0397401	2.89353	up	2.88289	2.76343	2.01649	4.27564	4.72316	3.2625	0	AATGTAAGAACTATTCTGAGCCTGCAGGCCATAGCCAAAGAGGTACCGGCTGTATTTTGT	ENST00000567099.1	16	-	78271258	78275115	3	78271258,78271984,78275094,	78271579,78272085,78275115,	ENSG00000260969.1	gene_id "ENSG00000260969.1"; transcript_id "ENST00000567099.1"; gene_type "antisense"; gene_status "NOVEL"; gene_name "RP11-190D6.2"; transcript_type "antisense"; transcript_status "KNOWN"; transcript_name "RP11-190D6.2-001"; level 2; tag "basic"; havana_gene "OTTHUMG00000176958.1"; havana_transcript "OTTHUMT00000434469.1";	ENST00000567099.1		Antisense	ENSEMBL	443
p16874	0.351166	0.0404532	2.1472	up	4.26212	4.01283	4.24846	5.38662	5.8385	4.60566	0	AATAGCCTATATTCTGTGGGGCTACCTCATCATTCACATGGTACAGAGCCTATGTGGCAT	ENST00000527128.1	9	+	100000730	100054275	12	100000730,100008377,100013073,100013822,100038850,100039837,100041643,100043797,100049941,100052865,100053135,100053652,	100000849,100008468,100013125,100013839,100038979,100039908,100041755,100043951,100050017,100052947,100053184,100054275,	ENSG00000254876.1	gene_id "ENSG00000254876.1"; transcript_id "ENST00000527128.1"; gene_type "processed_transcript"; gene_status "NOVEL"; gene_name "RP11-23J9.5"; transcript_type "retained_intron"; transcript_status "KNOWN"; transcript_name "RP11-23J9.5-002"; level 2; tag "readthrough_transcript"; havana_gene "OTTHUMG00000166998.1"; havana_transcript "OTTHUMT00000383514.2";	ENST00000527128.1		Intergenic	ENSEMBL	1575
p35248_v4	0.348733	0.0219439	3.19729	up	4.19323	4.34447	4.52461	6.70929	6.20526	5.17831	0	CCTCAAAGAGAAGCAACTCGCCTCATGACGATGAGCGCCCTGGAATTCCATGGAAGACAG	ENST00000437040.1	6	-	107831006	107832925	2	107831006,107832659,	107831069,107832925,	ENSG00000234206.1	gene_id "ENSG00000234206.1"; transcript_id "ENST00000437040.1"; gene_type "antisense"; gene_status "NOVEL"; gene_name "RP1-67A8.3"; transcript_type "antisense"; transcript_status "KNOWN"; transcript_name "RP1-67A8.3-002"; level 2; tag "basic"; havana_gene "OTTHUMG00000015310.1"; havana_transcript "OTTHUMT00000041689.1";	ENST00000437040.1		Antisense	ENSEMBL	329
p28308	0.348944	0.0232986	3.20585	up	5.76138	5.69358	4.76102	7.17776	7.62732	6.45303	0	CCTGTATTTACTGACCAGGAAAGACATCCATGACATATTGCTCAATAAAAGTTTAAAAGG	ASO1832	None	None	None	None	None	None	None	ASO1832	Accession=AK096625;Description=Homo sapiens cDNA FLJ39306 fis, clone OCBBF2013123.	asoverlaps_120_2859		Antisense	RNAdb	2859
p42145_v4	0.354729	0.0496362	2.12067	up	4.41485	4.10647	4.80831	6.1109	5.51288	4.95941	0	TCTGCAGTGGCTATGTTGTTTCTTAAACAGATGTAATGAGGCATCTATTCCCTGTGTGCC	NR_103717.1	10	+	122357460	122359635	1	122357460,	122359635,	none					RefSeq	2175
p4851	0.346721	0.00221674	2.07721	up	7.29464	7.1513	7.02103	8.26892	8.39825	7.96375	0	CAGTGTCCAGATGATTAAGATCCCACCAATAAAATCCTTCATCATGTGTCATGCAGTAAA	ENST00000553983.1	14	+	64065591	64065966	2	64065591,64065820,	64065728,64065966,	ENSG00000258800.1	gene_id "ENSG00000258800.1"; transcript_id "ENST00000553983.1"; gene_type "lincRNA"; gene_status "NOVEL"; gene_name "CTD-2302E22.2"; transcript_type "lincRNA"; transcript_status "KNOWN"; transcript_name "CTD-2302E22.2-001"; level 2; tag "basic"; havana_gene "OTTHUMG00000171130.1"; havana_transcript "OTTHUMT00000411859.1";	ENST00000553983.1	CTD-2302E22.2	Intergenic	ENSEMBL	283
p26379	0.354588	0.0482168	2.35203	up	4.96809	4.55948	4.30122	5.95769	6.46078	5.11203	0	GTCTCTTGAAATTTAATCAATGAGAACTTAGCATTTTCACAGTATGCTGTCACTTTGGAC	uc003qqc.1	6	+	155184661	155230000	2	155184661,155228863,	155185032,155230000,	AK124484	proteinID=;alignID=uc003qqc.1;kgID=uc003qqc.1;mRNA=AK124484;spID=;refseq=;protAcc=;description=Homo sapiens cDNA FLJ42493 fis, clone BRACE2034616.;rfamAcc=;tRnaName=;	UCSC_7112_1508		Intergenic	UCSC	1508
p8171	0.346721	0.00253553	2.45344	up	10.244	10.2152	10.5033	11.6723	11.8761	11.2986	0	AAATTTTGTTTGTAGTTCTTACATTCTCAGTGTGAGCCAATCTGGGACCCACTGCCCCAC	ENST00000589120.1	19	-	13054931	13055301	2	13054931,13055137,	13055037,13055301,	ENSG00000267458.1	gene_id "ENSG00000267458.1"; transcript_id "ENST00000589120.1"; gene_type "antisense"; gene_status "NOVEL"; gene_name "CTC-425F1.4"; transcript_type "antisense"; transcript_status "KNOWN"; transcript_name "CTC-425F1.4-001"; level 2; tag "basic"; havana_gene "OTTHUMG00000180575.1"; havana_transcript "OTTHUMT00000451958.1";	ENST00000589120.1	CTC-425F1.4	Antisense	ENSEMBL	270
p3356	0.352176	0.0430788	4.33404	up	5.35234	4.57327	4.56006	6.52225	8.265	6.04558	0	TTTGCCTCTGGGAGCTTTTCCTTTTTTAACAGTACTTTGTTGAGAGATGATTCACATATA	ENST00000550029.1	12	-	104157089	104162636	3	104157089,104160512,104162584,	104157596,104160691,104162636,	ENSG00000257681.1	gene_id "ENSG00000257681.1"; transcript_id "ENST00000550029.1"; gene_type "antisense"; gene_status "NOVEL"; gene_name "RP11-341G23.4"; transcript_type "antisense"; transcript_status "KNOWN"; transcript_name "RP11-341G23.4-001"; level 2; tag "basic"; havana_gene "OTTHUMG00000170059.1"; havana_transcript "OTTHUMT00000407098.1";	ENST00000550029.1		Antisense	ENSEMBL	738
RNA33481|snoRNA_scaRNA_77_134	0.346721	0.00523923	9.27258	up	1.48289	2.40393	1.39281	5.76339	5.05969	4.09546	0	CTATAGGAAGCCATAGCACTCCTAATGTTTGGTGCTATGTTTTCCTGAGGAGATATAAAA	RNA33481|snoRNA_scaRNA_77_134													ftp://ftp.ensembl.org/pub/current/fasta/homo_sapiens/ncrna/Homo_sapiens.GRCh37.61.ncrna.fa.gz	NA
p43378_v4	0.34911	0.0286272	2.0074	up	7.44289	7.33376	7.42675	8.51448	8.86069	7.84421	0	AGTTTACCAAACAGGCATTATGTTCTGGGTCCCATTCTGTGTCGGGTTCTCTTTTCACTC	NR_110325.1	17	+	43325291	43345997	5	43325291,43326900,43332504,43344479,43345375,	43325370,43326999,43332585,43344695,43345997,	none					RefSeq	1097
p9454	0.346721	0.00787443	2.14346	up	4.10845	3.48945	3.74999	4.92006	5.09123	4.63643	0	GGTAGCCTAAACTCTTTCCCCAATTTTTGATATCACTTCATGTCATTTTAGAGAGTAAGT	ENST00000447413.1	2	-	178186334	178257409	6	178186334,178188031,178196869,178199120,178203325,178257300,	178186965,178188124,178196979,178199257,178203427,178257409,	ENSG00000213963.2	gene_id "ENSG00000213963.2"; transcript_id "ENST00000447413.1"; gene_type "processed_transcript"; gene_status "NOVEL"; gene_name "AC074286.1"; transcript_type "processed_transcript"; transcript_status "KNOWN"; transcript_name "AC074286.1-003"; level 2; havana_gene "OTTHUMG00000132531.2"; havana_transcript "OTTHUMT00000257749.1";	uc002ulk.1;UCSC_8374_1187		Divergent	ENSEMBL	1182
p21767	0.350581	0.0382123	2.72584	up	2.9306	2.63888	3.46687	4.89358	4.84061	3.64226	0	TGGGACAACTGGCAAAAGGTAAGCATTCTTACCAAGGTTAACTGTCCCATATCACTGCCT	TCONS_00029762	22	+	20850203	20853121	2	20850203,20852953,	20850974,20853121,	XLOC_014159	Gene_id=XLOC_014159;Gene_name=linc-MED15-1;Transcript_id=TCONS_00029762;Transcript_name=linc-MED15-1;	XLOC_014159		Divergent	HumanLincRNACatalog	939
p12685	0.350581	0.0379394	2.00892	up	4.91795	4.37256	4.51498	5.58826	6.11405	5.12245	0	TTAAGCCATTCTGGCCCTTTCTGCTCTACTTTACCAGCTATAGAGTTAGGAAGGCTTCCA	ENST00000412595.3	4	+	39549455	39551432	2	39549455,39551104,	39549735,39551432,	ENSG00000238206.3	gene_id "ENSG00000238206.3"; transcript_id "ENST00000412595.3"; gene_type "lincRNA"; gene_status "NOVEL"; gene_name "RP11-472B18.2"; transcript_type "lincRNA"; transcript_status "KNOWN"; transcript_name "RP11-472B18.2-001"; level 2; tag "basic"; havana_gene "OTTHUMG00000160538.2"; havana_transcript "OTTHUMT00000360986.2";	ENST00000412595.3		Intergenic	ENSEMBL	608
p22448	0.353608	0.0458373	4.80403	up	4.62749	4.6441	4.0673	6.89188	7.94095	5.29879	0	ATAACAAGGTGGACCTAAAACTGGGTGACTTGAAACAATGAATTTTGATGTTCTATGGAA	TCONS_00007988	4	+	11315541	11352918	5	11315541,11330174,11338388,11338946,11352895,	11315564,11330335,11338456,11339043,11352918,	XLOC_003455	Gene_id=XLOC_003455;Gene_name=linc-CPEB2-11;Transcript_id=TCONS_00007988;Transcript_name=linc-CPEB2-11;	XLOC_003455		Intergenic	HumanLincRNACatalog	372
p27575	0.350581	0.03713	2.19815	up	7.69288	7.72482	7.58205	9.24563	9.0886	8.0744	0	GGTGGCCCCAAAAAACTCTCTTTAAAATTCAGCAGCTTATCAAAAATTAAAACCGTATTC	uc.154-	5	-	72210014	72210217	1	72210014,	72210217,	uc.154-	uc.154-	uc.154-		Antisense	UCR	203
p27244	0.350581	0.0379617	2.41565	up	6.26571	6.77341	6.35887	7.93501	8.28779	6.99244	0	ACTTGTTTCAGGTTAATGGTAAGAGTTACCCGCAGGCTAAGTTGCTATTGGGACAGATGG	uc.387+	15	+	42032053	42032291	1	42032053,	42032291,	uc.387+	uc.387+	UCRs_259_238		Antisense	UCR	238
p6606	0.346721	0.0125205	3.07354	up	7.11911	7.90748	7.69969	9.41092	9.55812	8.61694	0	GTGATCCTTTGTGCAGCGGCTGCTGGCCTCTCAAACTTAATGTGTTCATTGCGGAACTTG	ENST00000562298.1	16	+	89782935	89784572	2	89782935,89783751,	89783045,89784572,	ENSG00000261373.1	gene_id "ENSG00000261373.1"; transcript_id "ENST00000562298.1"; gene_type "antisense"; gene_status "NOVEL"; gene_name "RP11-368I7.2"; transcript_type "antisense"; transcript_status "KNOWN"; transcript_name "RP11-368I7.2-002"; level 2; tag "basic"; havana_gene "OTTHUMG00000173220.1"; havana_transcript "OTTHUMT00000422514.1";	ENST00000562298.1		Antisense	ENSEMBL	931
p30301	0.350581	0.0366395	2.53076	up	5.18766	5.67322	4.8383	6.7119	7.11465	5.89135	0	GGATACTGCCTGCTGTAAGACCATCCTCTATGGTTGTACTTTAATAAACAGTAATTTTTT	ASO1755	None	None	None	None	None	None	None	ASO1755	Accession=AK057062;Description=Homo sapiens cDNA FLJ32500 fis, clone SKNSH2000499.	asoverlaps_101_3020		Antisense	RNAdb	3020
p14143	0.346721	0.012119	4.31397	up	5.72918	4.954	4.17215	6.83351	7.41746	6.93141	0	GGTTGGTATAAGTTCCTCAGATCAACAAAAACCCATTTTCCTGTAAGTCTTACATTTAGT	ENST00000412685.2	6	-	30259151	30294643	5	30259151,30262247,30263908,30282045,30294130,	30260376,30262741,30264014,30282259,30294643,	ENSG00000231074.3	gene_id "ENSG00000231074.3"; transcript_id "ENST00000412685.2"; gene_type "antisense"; gene_status "KNOWN"; gene_name "HCG18"; transcript_type "antisense"; transcript_status "KNOWN"; transcript_name "HCG18-001"; level 2; tag "basic"; havana_gene "OTTHUMG00000031138.4"; havana_transcript "OTTHUMT00000076242.4";	ENST00000412685.2	HCG18	Antisense	ENSEMBL	2552
p6100	0.34911	0.0306836	7.15642	up	3.74217	4.33891	4.12264	7.72072	7.79223	5.20848	0	CGATAGAAGTCGACGTGGCATTGCCTCATCCTTTACAATATATGTATCCATTATATATTT	ENST00000561611.2	16	-	72459383	72698903	3	72459383,72513581,72698790,	72461356,72513689,72698903,	ENSG00000261008.2	gene_id "ENSG00000261008.2"; transcript_id "ENST00000561611.2"; gene_type "processed_transcript"; gene_status "NOVEL"; gene_name "AC004158.2"; transcript_type "lincRNA"; transcript_status "KNOWN"; transcript_name "AC004158.2-002"; level 2; tag "basic"; havana_gene "OTTHUMG00000173457.2"; havana_transcript "OTTHUMT00000423195.2";	ENST00000561611.2		Intergenic	ENSEMBL	2194
p29378	0.346721	0.0161462	2.42696	up	10.6824	9.76092	10.0179	11.6959	11.4716	11.1311	0	CATTTCCCAAATACTCTTTCAATCCAGCTGTGATTAACATTTTTGGGAAGTAACTCCTAT	ENST00000509938.1	4	-	113567878	113569855	3	113567878,113568570,113569809,	113568124,113568623,113569855,	ENSG00000249532.1	gene_id "ENSG00000249532.1"; transcript_id "ENST00000509938.1"; gene_type "antisense"; gene_status "NOVEL"; gene_name "RP11-148B6.1"; transcript_type "antisense"; transcript_status "KNOWN"; transcript_name "RP11-148B6.1-001"; level 2; tag "basic"; havana_gene "OTTHUMG00000161565.1"; havana_transcript "OTTHUMT00000365316.1";	ENST00000509938.1		Antisense	ENSEMBL	345
p2191	0.350435	0.035047	2.38453	up	10.173	9.43601	9.84162	11.3946	11.4234	10.3938	0	AGTGTTCTTTTCAAAGGTGACAGAGGCCCCCTCATGGTATTGTTTCATGATCAAGGTCGA	ENST00000527288.1	11	-	12282972	12284720	2	12282972,12284267,	12283019,12284720,	ENSG00000254680.1	gene_id "ENSG00000254680.1"; transcript_id "ENST00000527288.1"; gene_type "antisense"; gene_status "NOVEL"; gene_name "RP11-265D17.2"; transcript_type "antisense"; transcript_status "KNOWN"; transcript_name "RP11-265D17.2-001"; level 2; tag "basic"; havana_gene "OTTHUMG00000165779.1"; havana_transcript "OTTHUMT00000386174.1";	ENST00000527288.1		Antisense	ENSEMBL	500
p16901	0.34911	0.0304761	2.04402	up	5.24408	5.6855	5.17597	6.2943	6.91274	5.99274	0	CATCACTAGTTTGAAAGAATCCAACTTCATCAAATATTAACGTACCGAGTTGAAGGCTAC	ENST00000447891.1	9	+	123607151	123616651	3	123607151,123609571,123613515,	123607474,123609631,123616651,	ENSG00000226752.2	gene_id "ENSG00000226752.2"; transcript_id "ENST00000447891.1"; gene_type "processed_transcript"; gene_status "NOVEL"; gene_name "RP11-27I1.2"; transcript_type "processed_transcript"; transcript_status "KNOWN"; transcript_name "RP11-27I1.2-001"; level 2; tag "basic"; havana_gene "OTTHUMG00000020572.2"; havana_transcript "OTTHUMT00000053820.1";	NR_024408;RefSeq_517_3798		Intergenic	ENSEMBL	3519
p7020	0.348944	0.0242613	2.21164	up	4.54415	4.81641	4.21416	5.52485	6.19998	5.28523	0	TAAAGGTGCCTTAGCAAGATGAGTTATCTGGTATTTTTCCCTCTCCACCCTGGTCTTCTC	ENST00000580500.1	17	-	70400662	70441259	4	70400662,70424376,70427268,70441153,	70400957,70424439,70427365,70441259,	ENSG00000227036.2	gene_id "ENSG00000227036.2"; transcript_id "ENST00000580500.1"; gene_type "processed_transcript"; gene_status "KNOWN"; gene_name "LINC00511"; transcript_type "lincRNA"; transcript_status "KNOWN"; transcript_name "LINC00511-005"; level 2; havana_gene "OTTHUMG00000132227.4"; havana_transcript "OTTHUMT00000441422.1";	TCONS_00025151;XLOC_012568	LINC00511	Intergenic	ENSEMBL	561
p39626_v4	0.350581	0.0365565	3.75416	up	1.79382	2.1269	2.29109	4.61312	4.54432	2.77983	0	GGATGATGCATCATCTGCTCTTATTAATGTCATGTGATAATGGTTGCTCCCCAAGACTTG	XR_245056.1	2	-	1708631	1712533	3	1708631,1711542,1712446,	1708747,1711602,1712533,	none					RefSeq	263
p1816	0.353986	0.0475407	2.87264	up	2.5659	2.96483	3.01063	5.28422	4.34024	3.48404	0	TGCTGCAGATTTTCTGCACAACCCCTCCTCATGGGGGAAGGTTTGGTACCTGAATGAGGC	ENST00000421697.2	10	+	1568831	1599179	2	1568831,1598805,	1569094,1599179,	ENSG00000205696.4	gene_id "ENSG00000205696.4"; transcript_id "ENST00000421697.2"; gene_type "antisense"; gene_status "KNOWN"; gene_name "ADARB2-AS1"; transcript_type "antisense"; transcript_status "KNOWN"; transcript_name "ADARB2-AS1-002"; level 2; tag "mRNA_end_NF"; havana_gene "OTTHUMG00000017542.2"; havana_transcript "OTTHUMT00000046425.1";	NR_033387;RefSeq_3162_644	ADARB2-AS1	Antisense	ENSEMBL	637
p11240	0.346721	0.00840401	2.47053	up	3.36609	3.15069	3.57391	4.68851	5.07426	4.24238	0	GGGCATCTGACTAGAGTATTGTTTGATAACCAGAAAGAAATCAAAAATTGGTGATCACAA	ENST00000380711.3	22	+	51021454	51022306	2	51021454,51022026,	51021752,51022306,	ENSG00000205559.3	gene_id "ENSG00000205559.3"; transcript_id "ENST00000380711.3"; gene_type "antisense"; gene_status "NOVEL"; gene_name "CTA-384D8.20"; transcript_type "antisense"; transcript_status "KNOWN"; transcript_name "CTA-384D8.20-001"; level 1; tag "basic"; tag "exp_conf"; havana_gene "OTTHUMG00000150208.1"; havana_transcript "OTTHUMT00000316839.1";	NR_021492;RefSeq_3181_627	CTA-384D8.20	Antisense	ENSEMBL	578
p11217	0.346721	0.0104231	2.14742	up	5.42432	5.27567	5.64475	6.45091	6.96723	6.23443	0	AGAGCATTGACATGTTTGGCATGGATTTGTTTCACAGGGTCCCACAGAAACTTCTGCTCT	ENST00000332965.3	22	+	42665758	42670868	2	42665758,42669899,	42666031,42670868,	ENSG00000182057.4	gene_id "ENSG00000182057.4"; transcript_id "ENST00000332965.3"; gene_type "lincRNA"; gene_status "NOVEL"; gene_name "Z83851.3"; transcript_type "lincRNA"; transcript_status "KNOWN"; transcript_name "Z83851.3-001"; level 2; tag "basic"; havana_gene "OTTHUMG00000150700.1"; havana_transcript "OTTHUMT00000319662.1";	ENCODE_463_1242	Z83851.3	Intergenic	ENSEMBL	1242
p1776	0.346721	0.0130301	2.01205	up	4.16527	4.58935	4.46512	5.76757	5.40455	5.07361	0	AAGTCCTCAACCAAAATTCAGGTTTGCCCAGATGGCCTAATATCCTGAGGGCAAAAGCAA	ENST00000601363.1	10	-	127437383	127440643	4	127437383,127437943,127439008,127440553,	127437809,127438097,127439050,127440643,	ENSG00000236991.2	gene_id "ENSG00000236991.2"; transcript_id "ENST00000601363.1"; gene_type "antisense"; gene_status "NOVEL"; gene_name "RP11-383C5.7"; transcript_type "antisense"; transcript_status "KNOWN"; transcript_name "RP11-383C5.7-005"; level 2; tag "RNA_Seq_supported_only"; tag "basic"; havana_gene "OTTHUMG00000019234.2"; havana_transcript "OTTHUMT00000461892.1";	ENST00000601363.1		Antisense	ENSEMBL	712
p481	0.352682	0.0435276	2.00464	up	4.52009	4.49536	4.3916	5.58421	4.83183	6.00104	0	TAAAATTCCATGTGATCTAAAATTCCATCATTCTATCATGAGCCCAGGAGCTCCTGCTAC	ENST00000415019.1	1	-	158167711	158173667	2	158167711,158173582,	158169625,158173667,	ENSG00000176320.2	gene_id "ENSG00000176320.2"; transcript_id "ENST00000415019.1"; gene_type "lincRNA"; gene_status "NOVEL"; gene_name "RP11-404O13.5"; transcript_type "lincRNA"; transcript_status "KNOWN"; transcript_name "RP11-404O13.5-001"; level 2; tag "basic"; havana_gene "OTTHUMG00000022444.1"; havana_transcript "OTTHUMT00000058352.1";	ENCODE_266_1999		Intergenic	ENSEMBL	1999
p44527_v4	0.348745	0.0223653	3.14106	up	8.2413	7.93782	7.80802	9.68813	10.3838	8.869	0	TGTCACGCAGAAGAAGGTTAAGCTGTATTTGATTGCCAGTTTTACTGAAAATGCTTAGTA	uc010vhc.3	16	-	54952776	54962690	5	54952776,54954209,54957496,54959012,54962405,	54953121,54954322,54957562,54959125,54962690,	CRNDE	NR_034106	Homo sapiens colorectal neoplasia differentially expressed (non-protein coding) (CRNDE), transcript variant 2, non-coding RNA.			UCSC	922
p26227	0.348681	0.0203779	3.56701	up	3.65167	2.1151	2.84391	4.74513	5.05314	4.31656	0	TCCACCAATCAAAATTCCTTCCTGATCAGGTTTCTGGTTCAGATTTCAAAATCTCTCCTG	uc003can.3	3	+	15781726	15803697	2	15781726,15799661,	15781770,15803697,	BC041363	proteinID=;alignID=uc003can.3;kgID=uc003can.3;mRNA=BC041363;spID=;refseq=;protAcc=;description=Homo sapiens cDNA clone IMAGE:5273212.;rfamAcc=;tRnaName=;	uc003can.3		Antisense	UCSC	4080
p17284	0.350581	0.0380429	4.04585	up	3.34712	2.34043	1.2434	4.2976	4.79288	3.8898	0	ATCATGAAGGACAGTAAAAATCAGGAATTGCCAAACTTTGTCACAATGGCTGTACAACAT	ENST00000417305.1	Y	-	2834884	2870667	3	2834884,2849878,2870353,	2834980,2849968,2870667,	ENSG00000233070.1	gene_id "ENSG00000233070.1"; transcript_id "ENST00000417305.1"; gene_type "processed_transcript"; gene_status "NOVEL"; gene_name "ZFY-AS1"; transcript_type "processed_transcript"; transcript_status "KNOWN"; transcript_name "ZFY-AS1-001"; level 2; tag "basic"; havana_gene "OTTHUMG00000036156.1"; havana_transcript "OTTHUMT00000088058.1";	ENST00000417305.1	ZFY-AS1	Antisense	ENSEMBL	500
p25971	0.346924	0.0187563	3.95571	up	2.47313	1.48128	2.26356	4.89695	3.56106	3.71176	0	CTGTTCATGACGTATATGATGTGACATATTTTTCCACCAGATATTATGGGATAGAAGATG	uc002flc.1	16	-	88709698	88712089	1	88709698,	88712089,	BC028224	proteinID=;alignID=uc002flc.1;kgID=uc002flc.1;mRNA=BC028224;spID=;refseq=;protAcc=;description=Homo sapiens cDNA FLJ39808 fis, clone SPLEN2009081.;rfamAcc=;tRnaName=;	UCSC_3554_2391		Antisense	UCSC	2391
p14144	0.351827	0.0427172	2.40395	up	9.07325	7.97418	7.64954	9.52999	9.51618	9.44703	0	CCCATTTTGTGCCTCCCTTCCTAGAGTTTTAGCCAAAGGTTTAGCTAAGTAATTGGTTTT	ENST00000602698.1	6	-	30260021	30264014	3	30260021,30262629,30263908,	30260376,30262741,30264014,	ENSG00000231074.3	gene_id "ENSG00000231074.3"; transcript_id "ENST00000602698.1"; gene_type "antisense"; gene_status "KNOWN"; gene_name "HCG18"; transcript_type "antisense"; transcript_status "KNOWN"; transcript_name "HCG18-017"; level 2; tag "basic"; havana_gene "OTTHUMG00000031138.4"; havana_transcript "OTTHUMT00000468042.1";	ENST00000602698.1	HCG18	Antisense	ENSEMBL	573
p8258	0.348733	0.0215848	2.4885	up	4.74513	4.13718	4.02957	5.97914	5.81541	5.06317	0	GTCACTCTAAGTACTGTGGAAATAAACTAAATGTCAGGTTAGGAATAGAACAGTGAAAGA	ENST00000586248.1	19	-	28264870	28284286	2	28264870,28283907,	28265160,28284286,	ENSG00000261824.2	gene_id "ENSG00000261824.2"; transcript_id "ENST00000586248.1"; gene_type "lincRNA"; gene_status "NOVEL"; gene_name "LINC00662"; transcript_type "lincRNA"; transcript_status "KNOWN"; transcript_name "LINC00662-005"; level 2; havana_gene "OTTHUMG00000175754.2"; havana_transcript "OTTHUMT00000452839.1";	TCONS_00026762;XLOC_013282	LINC00662	Intergenic	ENSEMBL	669
p10466	0.346721	0.0145149	2.17093	up	2.74463	3.50775	3.53662	4.44211	4.47597	4.22586	0	CAGCCTCCGTGACCTGAAGGGAAATGATGAAAGACTTTTCTAGAAATAAATGATTTTTAA	ENST00000441214.1	20	-	48927247	48937879	3	48927247,48929450,48937611,	48927786,48930893,48937879,	ENSG00000233077.1	gene_id "ENSG00000233077.1"; transcript_id "ENST00000441214.1"; gene_type "processed_transcript"; gene_status "NOVEL"; gene_name "RP11-290F20.2"; transcript_type "processed_transcript"; transcript_status "KNOWN"; transcript_name "RP11-290F20.2-001"; level 2; tag "basic"; havana_gene "OTTHUMG00000032720.1"; havana_transcript "OTTHUMT00000079680.1";	ENST00000441214.1		Intergenic	ENSEMBL	2250
p34625_v4	0.34911	0.02911	2.71966	up	3.10505	3.92397	3.44942	5.37098	5.22177	4.21598	0	CCATCTCTCAAGCTGTTTACTTCCTGAAAGAGAAGCTGGATGCCACATTGCAACTGCAAG	ENST00000600742.1	19	-	50342483	50354314	3	50342483,50347572,50352266,	50343333,50347855,50354314,	ENSG00000268006.1	gene_id "ENSG00000268006.1"; transcript_id "ENST00000600742.1"; gene_type "antisense"; gene_status "KNOWN"; gene_name "PTOV1-AS1"; transcript_type "antisense"; transcript_status "KNOWN"; transcript_name "PTOV1-AS1-001"; level 2; tag "basic"; havana_gene "OTTHUMG00000183257.1"; havana_transcript "OTTHUMT00000465822.1";	ENST00000600742.1	PTOV1-AS1	Antisense	ENSEMBL	3181
p23851	0.346721	0.00437047	2.91041	up	4.7214	4.67326	5.01905	6.46469	6.69317	5.87952	0	GGTGGTCATGGATTTAAATCCAGGTGGACAGAAACTAATTATTCGCTCTAAAAAAGTCAG	TCONS_00013589	7	+	130033936	130035446	2	130033936,130034772,	130033963,130035446,	XLOC_006248	Gene_id=XLOC_006248;Gene_name=linc-MEST-2;Transcript_id=TCONS_00013589;Transcript_name=linc-MEST-2;	XLOC_006248		Antisense	HumanLincRNACatalog	701
p10304	0.354588	0.0488923	2.26794	up	3.39202	3.53967	4.32426	4.42146	5.4844	4.89425	0	AGAATCCAAAGCAATCTGGTCACACCACTTGGTGGGAAATACACCGAAATGTTAACTGTC	ENST00000417947.1	2	+	238521619	238535168	2	238521619,238533388,	238521896,238535168,	ENSG00000227107.1	gene_id "ENSG00000227107.1"; transcript_id "ENST00000417947.1"; gene_type "lincRNA"; gene_status "NOVEL"; gene_name "AC096574.5"; transcript_type "lincRNA"; transcript_status "KNOWN"; transcript_name "AC096574.5-001"; level 1; tag "basic"; tag "exp_conf"; havana_gene "OTTHUMG00000152959.1"; havana_transcript "OTTHUMT00000328769.1";	ENCODE_248_2057;TCONS_00003132;XLOC_001912		Intergenic	ENSEMBL	2057
p11860	0.346745	0.0179549	2.13415	up	7.3018	7.57144	6.74958	8.53111	8.34172	8.03098	0	CAGAATGTTACGTTTTAGGTGATGAAGTACCTGCTGCCAGAGTTTCCCCTGAAACACACA	ENST00000596274.1	3	+	69084246	69097715	3	69084246,69089525,69097338,	69084301,69089608,69097715,	ENSG00000244513.2	gene_id "ENSG00000244513.2"; transcript_id "ENST00000596274.1"; gene_type "antisense"; gene_status "NOVEL"; gene_name "CTD-2013N24.2"; transcript_type "antisense"; transcript_status "KNOWN"; transcript_name "CTD-2013N24.2-006"; level 2; tag "RNA_Seq_supported_only"; tag "basic"; havana_gene "OTTHUMG00000158770.2"; havana_transcript "OTTHUMT00000461521.1";	ENST00000596274.1	CTD-2013N24.2	Antisense	ENSEMBL	515
p6677	0.346924	0.0185232	2.14035	up	2.82819	3.54326	3.12775	4.30942	4.58113	3.90218	0	AGCACTTATGGTGCTGGACCATAAATGAAACAAGCTTTGAGAACTAACTGCCACCCCAGA	ENST00000579529.2	17	-	10644583	10672333	2	10644583,10672123,	10645040,10672333,	ENSG00000264016.2	gene_id "ENSG00000264016.2"; transcript_id "ENST00000579529.2"; gene_type "lincRNA"; gene_status "NOVEL"; gene_name "CTC-297N7.9"; transcript_type "lincRNA"; transcript_status "KNOWN"; transcript_name "CTC-297N7.9-001"; level 2; tag "basic"; havana_gene "OTTHUMG00000178048.3"; havana_transcript "OTTHUMT00000440345.3";	ENST00000579529.2	CTC-297N7.9	Intergenic	ENSEMBL	667
p26296	0.351166	0.0402961	2.58205	up	3.24711	4.31629	3.97231	5.1611	5.81283	4.66733	0	TAGTCAGCAATTACTTGCCTGAGGAAGGGAAGGCCTCCTCCTTTAAGAAAAGAATAGGCT	uc003kwu.1	5	-	131701645	131705196	2	131701645,131705108,	131702473,131705196,	LOC553103	proteinID=;alignID=uc003kwu.1;kgID=uc003kwu.1;mRNA=BX538252;spID=;refseq=;protAcc=;description=Homo sapiens uncharacterized LOC553103 (LOC553103), non-coding RNA.;rfamAcc=;tRnaName=;	UCSC_9603_916		Divergent	UCSC	916
p42490_v4	0.346721	0.00452378	2.26596	up	3.11467	3.47389	3.22651	4.61186	4.64231	4.10125	0	TCACATGATTTTCCCGCTTATATAAATCACAGCTTGTTTTTCTCAACCAGCTGCAGACTT	XR_245991.1	12	+	58288067	58290629	2	58288067,58289434,	58288134,58290629,	none					RefSeq	1262
p34914_v4	0.346721	0.00816169	4.05598	up	1.94514	1.99791	2.93044	4.69223	4.43377	3.80765	0	GTTTTGTCAGTTGCTTCCTCTGGAGTCCTTTTAAAAGACTACTTTTTAGAGCAGTTTTCA	ENST00000418516.1	21	-	44881991	44884797	3	44881991,44883219,44884752,	44882141,44883369,44884797,	ENSG00000185186.4	gene_id "ENSG00000185186.4"; transcript_id "ENST00000418516.1"; gene_type "lincRNA"; gene_status "KNOWN"; gene_name "LINC00313"; transcript_type "lincRNA"; transcript_status "KNOWN"; transcript_name "LINC00313-004"; level 2; havana_gene "OTTHUMG00000086867.1"; havana_transcript "OTTHUMT00000195629.1";	TCONS_00028947;XLOC_014105;TCONS_00028760;XLOC_014105;TCONS_00028948;XLOC_014105;TCONS_00028949;XLOC_014105;TCONS_00028950;XLOC_014105	LINC00313	Intergenic	ENSEMBL	345
p30163	0.353608	0.0465832	2.05753	up	5.14145	5.62553	5.12411	6.70563	6.62197	5.68623	0	GGGAGCCTGAAGTCCAGGCCTCTGAGATGATAGTCATAATTAAAGCTGCTGTTGACTGAA	XR_108947.1	9	+	129403009	129403572	2	129403009,129403255,	129403111,129403572,	LOC100505986	ID=rna20857;Name=XR_108947.1;Parent=gene17791;Dbxref=GeneID:100505986,Genbank:XR_108947.1;gbkey=misc_RNA;product=uncharacterized LOC100505986;transcript_id=XR_108947.1|ID=gene17791;Name=LOC100505986;Dbxref=GeneID:100505986;gbkey=Gene;gene=LOC100505986	XR_108947.1		Intronic	RefSeq	419
p16288	0.346721	0.0140061	3.59269	up	5.65544	5.23888	4.97034	7.01734	7.8676	6.51491	0	CCCATCTCATCTCTAATATAGAAGTGAAAAAAGCCATGTAATCCCACATATAACAAGAGT	ENST00000520562.1	8	+	94731801	94733395	2	94731801,94732996,	94732341,94733395,	ENSG00000253854.1	gene_id "ENSG00000253854.1"; transcript_id "ENST00000520562.1"; gene_type "antisense"; gene_status "NOVEL"; gene_name "RP11-10N23.2"; transcript_type "antisense"; transcript_status "KNOWN"; transcript_name "RP11-10N23.2-001"; level 2; tag "basic"; havana_gene "OTTHUMG00000164316.1"; havana_transcript "OTTHUMT00000378255.1";	ENST00000520562.1		Antisense	ENSEMBL	939
p10151	0.34911	0.0332644	5.71282	up	5.3874	5.23193	4.95342	6.14896	8.51061	8.45579	0	AACACATACTCATTTCCTTCGAGAATAGACGCCTTGATGGCTCCTCTGGCAGTTCTTGAT	ENST00000590932.1	2	+	179406473	179462408	2	179406473,179462322,	179407088,179462408,	ENSG00000237298.2	gene_id "ENSG00000237298.2"; transcript_id "ENST00000590932.1"; gene_type "antisense"; gene_status "NOVEL"; gene_name "TTN-AS1"; transcript_type "antisense"; transcript_status "KNOWN"; transcript_name "TTN-AS1-012"; level 2; tag "RNA_Seq_supported_only"; tag "basic"; havana_gene "OTTHUMG00000133536.5"; havana_transcript "OTTHUMT00000458922.1";	ENST00000590932.1	TTN-AS1	Antisense	ENSEMBL	701
p25841	0.346721	0.00556133	8.42576	up	6.00888	5.54607	5.41682	9.07225	9.44316	7.68079	0	GCAAACTGCAATCTCTTACCAGTCTCTTCTAGTTGAACTGTCATCTTCTCATTTAATATC	uc001tas.3	12	+	88448974	88452835	2	88448974,88450683,	88449049,88452835,	BC033323	proteinID=;alignID=uc001tas.3;kgID=uc001tas.3;mRNA=BC033323;spID=;refseq=;protAcc=;description=Homo sapiens cDNA clone IMAGE:4830945.;rfamAcc=;tRnaName=;	uc001tas.3		Antisense	UCSC	2227
p25987	0.350581	0.0367648	2.3516	up	3.87954	3.12077	4.25989	5.27145	5.13264	4.55703	0	ACAGCAGCTGGTTAGCCACTACTGGTGACTCTTCAAATATTACTTCATTTTTATTCTGTC	uc002fch.1	16	+	72459846	72462787	1	72459846,	72462787,	AK055364	proteinID=;alignID=uc002fch.1;kgID=uc002fch.1;mRNA=AK055364;spID=;refseq=;protAcc=;description=Homo sapiens cDNA FLJ30802 fis, clone FEBRA2001227.;rfamAcc=;tRnaName=;	UCSC_2353_2941		Intergenic	UCSC	2941
p24915	0.34911	0.0289186	2.84788	up	1.69307	3.03855	2.84557	4.27983	4.11397	3.71305	0	TTATTTGAAATCAATGTCAAGCATCGGTTATTCTAATCCTGGGGCTTGGCCAGACCTGGG	NR_073007.1	12	-	123745516	123756863	4	123745516,123749742,123751731,123756703,	123746350,123749869,123751829,123756863,	CDK2AP1	ID=rna27989;Name=NR_073007.1;Parent=gene23328;Dbxref=GeneID:8099,Genbank:NR_073007.1,HGNC:14002,HPRD:03726,MIM:602198;gbkey=misc_RNA;product=cyclin-dependent kinase 2 associated protein 1%2C transcript variant 4;transcript_id=NR_073007.1|ID=gene23328;Name=CDK2AP1;Dbxref=GeneID:8099,HGNC:14002,HPRD:03726,MIM:602198;description=cyclin-dependent kinase 2 associated protein 1;gbkey=Gene;gene=CDK2AP1;…	NR_073007.1		Antisense	RefSeq	1219
p22872	0.346721	0.0157567	2.05895	up	3.29864	2.92914	3.67179	4.44554	4.0559	4.52385	0	CAAAAAACAAAATACCGGGTGCACATCCCTTGAAGTTTCGGGTGTGTTTACTCTGAGGCA	TCONS_00009833	5	+	1931130	1949182	3	1931130,1933922,1948807,	1931503,1934099,1949182,	XLOC_004250	Gene_id=XLOC_004250;Gene_name=linc-C5orf38-5;Transcript_id=TCONS_00009833;Transcript_name=linc-C5orf38-5;	XLOC_004250		Intergenic	HumanLincRNACatalog	925
p35186_v4	0.353608	0.0466921	2.30908	up	4.42104	3.51091	4.19805	5.1005	5.87235	4.77909	0	TGACTGCATCTGCCAGATGACTACCAATGTGAGATTCTCTCTCCCTTGCTGTCTTTGAAA	ENST00000513406.1	5	+	76414144	76443935	3	76414144,76435090,76443476,	76414346,76435142,76443935,	ENSG00000250802.2	gene_id "ENSG00000250802.2"; transcript_id "ENST00000513406.1"; gene_type "processed_transcript"; gene_status "NOVEL"; gene_name "ZBED3-AS1"; transcript_type "processed_transcript"; transcript_status "PUTATIVE"; transcript_name "ZBED3-AS1-015"; level 2; havana_gene "OTTHUMG00000162473.3"; havana_transcript "OTTHUMT00000369076.2";	ENST00000513406.1	ZBED3-AS1	Intergenic	ENSEMBL	713
p6779	0.349241	0.0336846	2.43513	up	4.87892	5.33352	5.06846	6.96824	6.50277	5.66188	0	AGGTGTCGTACAGTCTTTGTTGCTGTCAACAGGTACTGATTCAGGTGACTTTATCTTGCA	ENST00000580873.1	17	-	29161342	29190046	2	29161342,29189713,	29161647,29190046,	ENSG00000265334.1	gene_id "ENSG00000265334.1"; transcript_id "ENST00000580873.1"; gene_type "antisense"; gene_status "NOVEL"; gene_name "CTD-2349P21.11"; transcript_type "antisense"; transcript_status "KNOWN"; transcript_name "CTD-2349P21.11-001"; level 2; tag "basic"; havana_gene "OTTHUMG00000179023.1"; havana_transcript "OTTHUMT00000444436.1";	ENST00000580873.1	CTD-2349P21.11	Antisense	ENSEMBL	638
p40694_v4	0.353608	0.0469759	2.83608	up	8.77329	8.41781	7.92816	10.1184	10.5429	8.96962	0	TGCCTTGTCCAAGTAAAACTGTACCATCGTTTATTCTCTGTGTTGTCAATAAAACACTAA	XR_427728.1	5	+	70149923	70161888	2	70149923,70160937,	70149956,70161888,	none					RefSeq	984
p1484	0.348681	0.0210029	3.00309	up	10.3722	11.4646	10.1146	12.0214	12.269	12.4204	0	AGGAACAGGTTACAGCTGACCCAGTTTCACTCCCAGCTTCAGAAGATGAATCACGATATT	ENST00000545372.1	10	-	5559331	5568204	4	5559331,5563878,5566271,5568095,	5559475,5564092,5566383,5568204,	ENSG00000205488.4	gene_id "ENSG00000205488.4"; transcript_id "ENST00000545372.1"; gene_type "antisense"; gene_status "NOVEL"; gene_name "CALML3-AS1"; transcript_type "antisense"; transcript_status "KNOWN"; transcript_name "CALML3-AS1-003"; level 2; tag "basic"; havana_gene "OTTHUMG00000168090.1"; havana_transcript "OTTHUMT00000398078.1";	ENST00000545372.1	CALML3-AS1	Antisense	ENSEMBL	579
p4887	0.346721	0.0148388	4.80237	up	9.33574	9.29114	9.33275	12.6822	10.9434	11.1253	0	AGCTGGGAGAGATGAAAGCAGGCAAGGCTGATTGGAAACCTCTGGCCTGATGTCACGGTG	ENST00000554939.1	14	+	74964885	74967501	2	74964885,74967231,	74965336,74967501,	ENSG00000258579.1	gene_id "ENSG00000258579.1"; transcript_id "ENST00000554939.1"; gene_type "antisense"; gene_status "NOVEL"; gene_name "RP3-449M8.3"; transcript_type "antisense"; transcript_status "KNOWN"; transcript_name "RP3-449M8.3-001"; level 2; tag "basic"; havana_gene "OTTHUMG00000171215.1"; havana_transcript "OTTHUMT00000412358.1";	ENST00000554939.1		Antisense	ENSEMBL	721
p28604	0.348944	0.0266961	2.49062	up	4.97049	4.83723	5.35452	7.05114	6.18572	5.8749	0	GCATGGCACAACATACTGCATGGGCTTACACCCAGAAAATTTGGATTTTAATAAAAATTT	ASO1786	None	None	None	None	None	None	None	ASO1786	Accession=AK092482;Description=Homo sapiens cDNA FLJ35163 fis, clone PLACE6011907.	asoverlaps_227_2386		Antisense	RNAdb	2386
p29125	0.34911	0.0321716	2.00329	up	4.37516	4.51931	5.00723	5.90174	5.8606	5.14648	0	GGAAATGTGGAACGCACACGATCATTCTTACTGTTAAAAAACCCCACAAAGATTATAAAA	ENST00000565107.1	15	-	93135808	93139618	1	93135808,	93139618,	ENSG00000260337.1	gene_id "ENSG00000260337.1"; transcript_id "ENST00000565107.1"; gene_type "processed_transcript"; gene_status "NOVEL"; gene_name "RP11-386M24.6"; transcript_type "TEC"; transcript_status "KNOWN"; transcript_name "RP11-386M24.6-001"; level 2; havana_gene "OTTHUMG00000173074.1"; havana_transcript "OTTHUMT00000422054.1";	ENST00000565107.1		Intergenic	ENSEMBL	3810
p13407	0.346721	0.00299541	3.55047	up	7.93428	7.67791	7.31262	9.41184	9.87505	9.12194	0	TCAGAAGCTGATACATTTTCATCGGCATCAGACCGTATTTCTATGTATTCAATATCTGAC	ENST00000435042.1	5	-	131973767	131999964	4	131973767,131977437,131977874,131999870,	131973957,131977525,131977974,131999964,	ENSG00000223442.1	gene_id "ENSG00000223442.1"; transcript_id "ENST00000435042.1"; gene_type "antisense"; gene_status "NOVEL"; gene_name "AC004041.2"; transcript_type "antisense"; transcript_status "KNOWN"; transcript_name "AC004041.2-004"; level 2; tag "not_organism_supported"; tag "basic"; havana_gene "OTTHUMG00000059612.2"; havana_transcript "OTTHUMT00000132781.1";	ENST00000435042.1		Antisense	ENSEMBL	472
p24984	0.353608	0.046774	4.42961	up	3.89763	4.834	5.64901	7.59782	7.39994	5.82442	0	AATGATATCCCTGTTCTAATTCCACTCTGGCTAAACTGAAAGTAAAGATCCTTAAGCTTA	XR_110256.1	14	-	105057200	105059398	1	105057200,	105059398,	LOC100288144	ID=rna30413;Name=XR_110256.1;Parent=gene25625;Dbxref=GeneID:100288144,Genbank:XR_110256.1;gbkey=misc_RNA;product=uncharacterized LOC100288144;transcript_id=XR_110256.1|ID=gene25625;Name=LOC100288144;Dbxref=GeneID:100288144;gbkey=Gene;gene=LOC100288144	XR_110256.1		Intergenic	RefSeq	2198
p25444	0.350581	0.0363258	2.39088	up	7.62246	7.35293	7.24354	9.17029	8.92467	7.89659	0	CAGGAGTGTGCAAAACAATCTGTAAGGGTTCAGAAAACATACTGCTTCTATATATAGTTA	NR_038361.1	7	-	77313167	77326662	3	77313167,77314518,77325212,	77313568,77314645,77326662,	RSBN1L-AS1	ID=rna16801;Name=NR_038361.1;Parent=gene14168;Dbxref=GeneID:100505854,Genbank:NR_038361.1,HGNC:44173;gbkey=misc_RNA;product=RSBN1L antisense RNA 1;transcript_id=NR_038361.1|ID=gene14168;Name=RSBN1L-AS1;Dbxref=GeneID:100505854,HGNC:44173;description=RSBN1L antisense RNA 1;gbkey=Gene;gene=RSBN1L-AS1	UCSC:uc003ugk.4		Antisense	RefSeq	1978
p39801_v4	0.350581	0.0384013	2.08611	up	4.04408	4.24077	4.21391	5.76497	4.58809	5.32815	0	GGCTGAAAAACAGCTGTTAAAATGGCTTGTTTGTTTGAAGATGAATGAGAGTACACAATA	XR_427143.1	2	-	99385479	99388699	3	99385479,99388081,99388481,	99385509,99388363,99388699,	none					RefSeq	530
RNA33553|snoRNA_scaRNA_149_104	0.352697	0.0440287	2.27817	up	4.80605	5.43372	4.88156	6.67973	6.48468	5.52054	0	ATGTTCCAGTTGAGACTCAAGAAAAGGATTCTGAGCCTCAGAGCTTTGAAGGAGCCACTT	RNA33553|snoRNA_scaRNA_149_104													ftp://ftp.ensembl.org/pub/current/fasta/homo_sapiens/ncrna/Homo_sapiens.GRCh37.61.ncrna.fa.gz	NA
p2813	0.346721	0.00916968	3.54101	up	4.40789	4.06692	4.75815	6.77704	6.29336	5.63505	0	CCAAATATGAAATGCCTTCTCTAGATTAAAAGGATTCAGAGATGTTGCACTATTGCACTA	ENST00000534517.1	11	+	67820289	67821229	2	67820289,67820828,	67820552,67821229,	ENSG00000255031.1	gene_id "ENSG00000255031.1"; transcript_id "ENST00000534517.1"; gene_type "processed_transcript"; gene_status "PUTATIVE"; gene_name "RP11-802E16.3"; transcript_type "processed_transcript"; transcript_status "PUTATIVE"; transcript_name "RP11-802E16.3-001"; level 1; tag "exp_conf"; havana_gene "OTTHUMG00000167383.2"; havana_transcript "OTTHUMT00000394450.1";	ENST00000534517.1		Antisense	ENSEMBL	664
p20252	0.346721	0.014517	2.32435	up	7.60155	7.56585	7.24723	8.78617	9.10362	8.17531	0	GTCTGAATTCCAGGTCACTAACCACTTGTCTCTTCTGTTTCCCCATTCCTTTCTGTCTGC	TCONS_00025824	17	+	7308193	7311457	2	7308193,7310933,	7308929,7311457,	XLOC_012097	Gene_id=XLOC_012097;Gene_name=linc-NLGN2-1;Transcript_id=TCONS_00025824;Transcript_name=linc-NLGN2-1;	XLOC_012097		Divergent	HumanLincRNACatalog	1260
RNA33456|snoRNA_scaRNA_52_137	0.346721	0.0115941	2.48619	up	2.99456	2.881	3.3171	4.35211	4.85436	3.92801	0	TAAAACAGATGGTTCCTGCCGACAGGGTCTGTATAGTTATCAGATTTTCTGTGCGATGGC	RNA33456|snoRNA_scaRNA_52_137													ftp://ftp.ensembl.org/pub/current/fasta/homo_sapiens/ncrna/Homo_sapiens.GRCh37.61.ncrna.fa.gz	NA
p19820	0.348944	0.0279864	3.92744	up	2.37082	3.28862	3.53199	4.90692	5.90251	4.30276	0	CCCGGTGAGCCTCTCACTATCGTCCTTCTAAAAGACACTTCAAAAAGAGGCAAAATCATG	TCONS_00023506	15	+	91382984	91384570	2	91382984,91384383,	91383130,91384570,	XLOC_011350	Gene_id=XLOC_011350;Gene_name=linc-FURIN-1;Transcript_id=TCONS_00023506;Transcript_name=linc-FURIN-1;	XLOC_011350		Intergenic	HumanLincRNACatalog	333
p28584	0.34911	0.0297602	2.32945	up	5.46025	5.28747	5.1862	6.52765	7.15703	5.9092	0	CTGAAATGAAAATTCTGCAGGATTTGGATGTGTACAGTCCTACGTTTCTATAATGTCTTA	ASO1874	None	None	None	None	None	None	None	ASO1874	Accession=AK123645;Description=Homo sapiens cDNA FLJ41651 fis, clone FEBRA2024727.	asoverlaps_264_2238		Divergent	RNAdb	2238
p7383	0.348944	0.0254838	2.14329	up	5.756	5.71746	5.84128	6.91897	7.39069	6.30456	0	TTCTTCTAGGTATCAGTAGCAAATTCAAAAACTACAGAATCAGCTCCAGAGGACTTTGTT	ENST00000585780.1	17	+	43339143	43345426	3	43339143,43344479,43344782,	43340758,43344695,43345426,	ENSG00000267278.1	gene_id "ENSG00000267278.1"; transcript_id "ENST00000585780.1"; gene_type "antisense"; gene_status "NOVEL"; gene_name "MAP3K14-AS1"; transcript_type "antisense"; transcript_status "KNOWN"; transcript_name "MAP3K14-AS1-008"; level 2; tag "basic"; havana_gene "OTTHUMG00000180362.1"; havana_transcript "OTTHUMT00000450941.1";	ENST00000585780.1	MAP3K14-AS1	Antisense	ENSEMBL	2475
p29495	0.346721	0.0159904	2.58405	up	3.24009	3.95511	3.17131	5.28678	4.55339	4.63525	0	GATCCTGCTACCAGGTTATGATAGATTTTATGGTATGTCTCAAGATATTGAGATAAAGGT	ENST00000522060.1	8	-	144063465	144099798	3	144063465,144090465,144099576,	144063918,144090624,144099798,	ENSG00000247317.3	gene_id "ENSG00000247317.3"; transcript_id "ENST00000522060.1"; gene_type "processed_transcript"; gene_status "NOVEL"; gene_name "RP11-273G15.2"; transcript_type "processed_transcript"; transcript_status "PUTATIVE"; transcript_name "RP11-273G15.2-004"; level 1; tag "exp_conf"; havana_gene "OTTHUMG00000164752.1"; havana_transcript "OTTHUMT00000380064.1";	ENST00000522060.1		Divergent	ENSEMBL	834
RNA147056|p0160_imsncRNA249	0.346721	0.0128282	5.06701	up	3.38247	4.01853	2.34938	5.66691	5.98107	5.12581	0	AAACATTTAAACCTATGCTGAAAATACGATAAAAGAAAAACAACTCCAATATGCTAAAAG	RNA147056|p0160_imsncRNA249													unpublished data	NA
p17546	0.351951	0.0429065	2.08796	up	2.23129	3.32832	2.72882	4.06844	3.48278	3.92349	0	CAAAAAATGTCACAGTGGTTCCTTGATCAGGTAGAAAGATGACAGAGCCCAACATACCAG	TCONS_00001806	1	-	212603321	212606095	3	212603321,212605082,212605966,	212603678,212605186,212606095,	XLOC_001192	Gene_id=XLOC_001192;Gene_name=linc-TMEM206-5;Transcript_id=TCONS_00001806;Transcript_name=linc-TMEM206-5;	XLOC_001192		Divergent	HumanLincRNACatalog	590
p21176	0.346924	0.0183873	2.49191	up	3.94883	4.26068	5.08508	5.78509	5.81143	5.64981	0	ACTTGTGATCTATTCTTCATGATAATATAGGCTAAACCTGAGCCCTGGGCTCCAGGACAG	TCONS_00003770	2	+	95924700	95925721	2	95924700,95925267,	95924984,95925721,	XLOC_001574	Gene_id=XLOC_001574;Gene_name=linc-PROM2-1;Transcript_id=TCONS_00003770;Transcript_name=linc-PROM2-1;	XLOC_001574		Intergenic	HumanLincRNACatalog	738
p10082	0.354588	0.0487868	3.58844	up	3.62019	4.01273	4.21671	6.00838	6.76877	4.60254	0	CACAAGTGGCAACTTTTAAGTAATCCTGAAAGCATTAAGAAGCAATGAAGGCAAATCTTA	ENST00000594921.1	2	+	160251931	160261147	4	160251931,160252987,160255404,160260903,	160252681,160253047,160255499,160261147,	ENSG00000223642.2	gene_id "ENSG00000223642.2"; transcript_id "ENST00000594921.1"; gene_type "antisense"; gene_status "NOVEL"; gene_name "AC008277.1"; transcript_type "antisense"; transcript_status "KNOWN"; transcript_name "AC008277.1-002"; level 2; tag "basic"; havana_gene "OTTHUMG00000154042.2"; havana_transcript "OTTHUMT00000462163.1";	ENST00000594921.1		Antisense	ENSEMBL	1149
p9743	0.346721	0.00444898	2.19262	up	8.90714	8.35313	8.32163	9.6469	9.74771	9.58526	0	ACTTACCAGGAAGATGACGAATATCCTTAATAAAATGTTTTCTTTTCGGCTGCATCACAA	ENST00000438935.2	2	+	37440609	37443336	3	37440609,37442463,37443255,	37440697,37442661,37443336,	ENSG00000243788.2	gene_id "ENSG00000243788.2"; transcript_id "ENST00000438935.2"; gene_type "processed_transcript"; gene_status "NOVEL"; gene_name "AC007390.6"; transcript_type "processed_transcript"; transcript_status "KNOWN"; transcript_name "AC007390.6-001"; level 2; tag "basic"; havana_gene "OTTHUMG00000152168.2"; havana_transcript "OTTHUMT00000325568.2";	ENST00000438935.2		Antisense	ENSEMBL	367
p30239	0.353608	0.0469976	2.1507	up	3.8941	4.88456	4.51123	5.81686	5.77449	5.01295	0	AGAGGATTCATCACTCTGTTCAGAATCCCCAGGACTCCCTAGGGAAGGAGGTCCCAGCCT	uc003txa.3	7	-	72445091	72470073	6	72445091,72450473,72468697,72469198,72469577,72469993,	72446510,72450547,72468887,72469313,72469685,72470073,	STAG3L3	proteinID=;alignID=uc003txa.3;kgID=uc003txa.3;mRNA=AL137492;spID=;refseq=;protAcc=;description=Homo sapiens stromal antigen 3-like 3 (STAG3L3), non-coding RNA.;rfamAcc=;tRnaName=;	uc003txa.3		Intergenic	UCSC	1986
p14060	0.346721	0.0093115	2.43262	up	7.49359	7.86509	7.72217	8.86134	9.45593	8.61112	0	TGGACCCTGATCTTCTGGTGGGTTTACCAGTTACTTGTAGAGTGTCCCTGTGATAGTTTT	ENST00000508309.1	5	+	180258026	180261779	2	180258026,180261311,	180258229,180261779,	ENSG00000245060.2	gene_id "ENSG00000245060.2"; transcript_id "ENST00000508309.1"; gene_type "processed_transcript"; gene_status "NOVEL"; gene_name "LINC00847"; transcript_type "processed_transcript"; transcript_status "PUTATIVE"; transcript_name "LINC00847-004"; level 2; havana_gene "OTTHUMG00000162270.1"; havana_transcript "OTTHUMT00000368347.1";	ENST00000508309.1	LINC00847	Intergenic	ENSEMBL	671
p2083	0.349241	0.0338895	2.45472	up	5.91571	5.37459	5.19068	7.10778	7.16214	6.09774	0	TATATCCCTGAGTAACGGCAGATAAGGATTTAAGGTTGAGGATATTCCCCAAATGCTCTT	ENST00000443919.1	10	+	101949792	101950504	2	101949792,101950055,	101949921,101950504,	ENSG00000236308.1	gene_id "ENSG00000236308.1"; transcript_id "ENST00000443919.1"; gene_type "antisense"; gene_status "NOVEL"; gene_name "RP11-316M21.7"; transcript_type "antisense"; transcript_status "KNOWN"; transcript_name "RP11-316M21.7-001"; level 2; tag "basic"; havana_gene "OTTHUMG00000018904.1"; havana_transcript "OTTHUMT00000049855.1";	ENST00000443919.1		Antisense	ENSEMBL	578
p7297	0.353608	0.0453721	6.07179	up	1.98754	1.85851	2.41532	5.36153	5.78089	2.92532	0	CTCTGTGTGTACAGCACACAAGTAATATACACAAATATATTCCATGTCTGAACAAATCCT	ENST00000580360.1	17	+	30655459	30656414	2	30655459,30656362,	30655678,30656414,	ENSG00000265139.1	gene_id "ENSG00000265139.1"; transcript_id "ENST00000580360.1"; gene_type "lincRNA"; gene_status "NOVEL"; gene_name "RP11-227G15.2"; transcript_type "lincRNA"; transcript_status "KNOWN"; transcript_name "RP11-227G15.2-001"; level 2; tag "basic"; havana_gene "OTTHUMG00000179571.1"; havana_transcript "OTTHUMT00000447127.1";	ENST00000580360.1		Intergenic	ENSEMBL	271
p27026	0.350581	0.0361015	2.94808	up	3.89599	3.44534	3.08901	5.48322	5.48004	4.14641	0	TTCATGCGGTAATGACCCTTTTCAGAGACAATGGTCATCATGGATTATGCGTTTCCAATT	uc.36+	1	+	109240427	109240691	1	109240427,	109240691,	uc.36+	uc.36+	UCRs_170_264		Intronic	UCR	264
p15604	0.346721	0.00262436	2.12615	up	3.06382	3.5449	3.14013	4.24761	4.30003	4.46593	0	TTCATAGAAATGACATTACGCTTGAGCCATGGATGATGATAAGGATTCTGCCAGCCTGCC	ENST00000533322.1	8	-	11415974	11417529	3	11415974,11416420,11417292,	11416256,11416495,11417529,	ENSG00000255354.1	gene_id "ENSG00000255354.1"; transcript_id "ENST00000533322.1"; gene_type "antisense"; gene_status "NOVEL"; gene_name "RP11-148O21.2"; transcript_type "antisense"; transcript_status "KNOWN"; transcript_name "RP11-148O21.2-001"; level 1; tag "basic"; tag "exp_conf"; havana_gene "OTTHUMG00000165416.1"; havana_transcript "OTTHUMT00000383907.1";	ENST00000533322.1		Antisense	ENSEMBL	594
p30065	0.352697	0.0436474	3.41813	up	2.78481	2.03277	3.14046	4.98842	4.89042	3.39883	0	GGAACATCATTGAATTCAGACAGATCTGGATTGAAACAGATTAAAGTGCCTACACTTTAA	NR_029383.1	13	-	28710979	28713311	2	28710979,28712683,	28712542,28713311,	PAN3-AS1	ID=rna28251;Name=NR_029383.1;Parent=gene23627;Dbxref=GeneID:100288730,Genbank:NR_029383.1,HGNC:39932;gbkey=misc_RNA;product=PAN3 antisense RNA 1;transcript_id=NR_029383.1|ID=gene23627;Name=PAN3-AS1;Dbxref=GeneID:100288730,HGNC:39932;description=PAN3 antisense RNA 1;gbkey=Gene;gene=PAN3-AS1	RefSeq_1513_2191		Antisense	RefSeq	2191
p2670	0.348944	0.0259445	2.52083	up	3.89205	5.01554	4.03407	5.68793	5.89561	5.3598	0	CCAGCTGTACAGTTCCTGTTGTTGGTTTCACATAAAGTAATTGCACATTATTTTGTCATA	ENST00000542172.1	11	+	18624533	18625440	2	18624533,18625318,	18624742,18625440,	ENSG00000247595.2	gene_id "ENSG00000247595.2"; transcript_id "ENST00000542172.1"; gene_type "processed_transcript"; gene_status "NOVEL"; gene_name "SPTY2D1-AS1"; transcript_type "retained_intron"; transcript_status "KNOWN"; transcript_name "SPTY2D1-AS1-002"; level 2; havana_gene "OTTHUMG00000167731.1"; havana_transcript "OTTHUMT00000395939.1";	ENST00000542172.1	SPTY2D1-AS1	Intergenic	ENSEMBL	331
p43871_v4	0.346721	0.0126322	2.18457	up	5.71875	5.71761	5.54821	6.99099	7.09501	6.28062	0	ATCCTTTTTCGACACCTTTGCGGGATCCAGCCCTCCAAGGAAAGCTTCCTGAGCAGTGCG	XR_430436.1	22	-	29579344	29601795	3	29579344,29601148,29601459,	29579369,29601310,29601795,	none					RefSeq	523
p37261_v4	0.346924	0.019618	3.15201	up	3.56919	4.71216	4.51603	5.59521	6.43988	5.7311	0	CAAACAAGGGATCTATCGTGTGGTATAGAAGTTTACACAAAGAGGCATCTGATTTTAAGT	ENST00000607985.1	2	+	136751401	136757951	5	136751401,136753761,136754692,136756256,136757826,	136751447,136753978,136754812,136756408,136757951,	ENSG00000231890.3	gene_id "ENSG00000231890.3"; transcript_id "ENST00000607985.1"; gene_type "antisense"; gene_status "NOVEL"; gene_name "AC093391.2"; transcript_type "antisense"; transcript_status "KNOWN"; transcript_name "AC093391.2-020"; level 2; tag "basic"; havana_gene "OTTHUMG00000153578.3"; havana_transcript "OTTHUMT00000472735.1";			Antisense	ENSEMBL	660
p43207_v4	0.346924	0.0186257	2.26093	up	4.92402	4.98289	5.08056	6.77758	5.92248	5.81815	0	GTGGCTCAACTTTTCAAATACTTACCTAATTAATACACATAGTTAGATCAAGCCAAAGGG	XR_243443.1	16	-	50134388	50140563	2	50134388,50140454,	50134681,50140563,	none					RefSeq	402
p14678	0.348944	0.0234189	2.41067	up	4.71364	4.76693	5.19405	6.30687	6.63065	5.54539	0	CCTGACTTGTCTGTCCTCTAATGTCTGAAGACATCTGACCTCTGCTCTTTCAGTAAAAGC	ENST00000449620.2	6	+	114291398	114316966	4	114291398,114313056,114314506,114316763,	114291487,114313182,114314651,114316966,	ENSG00000228624.2	gene_id "ENSG00000228624.2"; transcript_id "ENST00000449620.2"; gene_type "processed_transcript"; gene_status "NOVEL"; gene_name "RP3-399L15.3"; transcript_type "processed_transcript"; transcript_status "KNOWN"; transcript_name "RP3-399L15.3-015"; level 2; havana_gene "OTTHUMG00000164691.2"; havana_transcript "OTTHUMT00000379844.1";	ENST00000449620.2		Antisense	ENSEMBL	563
p28588	0.346721	0.0163278	2.95531	up	6.86068	6.80035	6.38884	8.37829	8.79935	7.56215	0	GCTTTTGGTTGCATGCCCTGATCTGTAGAAGTTAACAAGGAAATAAAATTTCCAAGTATT	ASO1651	None	None	None	None	None	None	None	ASO1651	Accession=AF090093;Description=Homo sapiens clone IMAGE 254188.	asoverlaps_867_712		Antisense	RNAdb	712
p14987	0.348944	0.0239461	3.64414	up	3.04491	2.67999	3.6178	5.37215	5.48564	4.08165	0	TTCAAAACTTCACATTTGCTTCTGGGAAGCCCATTCTGGAAAGTTTCTCTGTGGCCCTCT	ENST00000430801.1	7	-	77288409	77325582	4	77288409,77290514,77314518,77325488,	77288635,77290650,77314645,77325582,	ENSG00000214293.4	gene_id "ENSG00000214293.4"; transcript_id "ENST00000430801.1"; gene_type "processed_transcript"; gene_status "PUTATIVE"; gene_name "RSBN1L-AS1"; transcript_type "processed_transcript"; transcript_status "PUTATIVE"; transcript_name "RSBN1L-AS1-002"; level 1; tag "exp_conf"; havana_gene "OTTHUMG00000162596.1"; havana_transcript "OTTHUMT00000340788.1";	ENST00000430801.1	RSBN1L-AS1	Divergent	ENSEMBL	583
p16972	0.346721	0.00712289	2.25425	up	6.86789	6.83081	6.69024	8.28771	8.08418	7.53498	0	GTGAAGCGATATATAATTGCATAATTTCTGTGTGTAAACTGAATGCTTGGGCTTTCAATC	ENST00000445107.1	X	-	2770780	2771801	2	2770780,2771556,	2771050,2771801,	ENSG00000235483.1	gene_id "ENSG00000235483.1"; transcript_id "ENST00000445107.1"; gene_type "antisense"; gene_status "NOVEL"; gene_name "GYG2-AS1"; transcript_type "antisense"; transcript_status "KNOWN"; transcript_name "GYG2-AS1-001"; level 2; tag "not_best_in_genome_evidence"; tag "basic"; havana_gene "OTTHUMG00000021074.1"; havana_transcript "OTTHUMT00000055632.1";	ENST00000445107.1	GYG2-AS1	Antisense	ENSEMBL	515
p19922	0.346721	0.00123129	3.21119	up	6.60329	6.5123	5.9852	8.13451	8.11323	7.90237	0	GCAAATGATGAAAATGATAAAAAGACAAAAGTCAGGCACCAACCTCCCATTTGGATATTT	TCONS_00024719	16	-	72276918	72283140	2	72276918,72283061,	72277312,72283140,	XLOC_012002	Gene_id=XLOC_012002;Gene_name=linc-PMFBP1-3;Transcript_id=TCONS_00024719;Transcript_name=linc-PMFBP1-3;	XLOC_012002		Intergenic	HumanLincRNACatalog	473
p21089	0.354729	0.0493566	2.86779	up	2.90484	2.66829	3.87738	4.5911	5.39928	4.01995	0	AAGACTGCTATGACTGTGGACTTTCTATTGCATTCACATAATAAAATCATGCGACATTGT	TCONS_00002644	2	+	33152193	33171200	4	33152193,33153098,33153302,33170293,	33152413,33153190,33153472,33171200,	XLOC_001418	Gene_id=XLOC_001418;Gene_name=linc-LTBP1-1;Transcript_id=TCONS_00002644;Transcript_name=linc-LTBP1-1;	NR_027097.1;RefSeq_2395_1391;XLOC_001418		Intergenic	HumanLincRNACatalog	1389
p7363	0.348733	0.0220562	3.24333	up	2.92251	3.22598	4.29482	4.92557	5.59915	5.01104	0	GCTTCATGCATGAGCTGAAGGCAGAACCTGTCATATAATATTAGCTGACGTGTACCTGTG	ENST00000585530.1	17	+	40091550	40093294	4	40091550,40091723,40092725,40093014,	40091601,40091796,40092787,40093294,	ENSG00000204815.4	gene_id "ENSG00000204815.4"; transcript_id "ENST00000585530.1"; gene_type "processed_transcript"; gene_status "KNOWN"; gene_name "TTC25"; transcript_type "processed_transcript"; transcript_status "KNOWN"; transcript_name "TTC25-002"; level 2; havana_gene "OTTHUMG00000180002.1"; havana_transcript "OTTHUMT00000449238.1";	ENST00000585530.1	TTC25	Antisense	ENSEMBL	466
p11529	0.350581	0.0358959	4.07349	up	2.68076	3.15644	3.68561	5.44615	6.06572	4.08974	0	AACCAACTCTAGCTATGATGTCCGTAACTACGTAAAAAACCAGAACTGCTTTTAAACCCC	ENST00000512277.1	3	-	140833965	140843024	3	140833965,140835907,140842917,	140834178,140835979,140843024,	ENSG00000251270.1	gene_id "ENSG00000251270.1"; transcript_id "ENST00000512277.1"; gene_type "antisense"; gene_status "NOVEL"; gene_name "RP11-231L11.1"; transcript_type "antisense"; transcript_status "KNOWN"; transcript_name "RP11-231L11.1-001"; level 1; tag "basic"; tag "exp_conf"; havana_gene "OTTHUMG00000160222.1"; havana_transcript "OTTHUMT00000359719.1";	ENST00000512277.1		Antisense	ENSEMBL	392
p12945	0.348944	0.0240853	6.83697	up	4.34193	4.02494	4.06665	7.07528	8.1795	5.49881	0	CTCCACCATCTCTAAGAACAAGCAGCTATTTCTGTAGAGAAAGATCATCTTTGGATAACA	ENST00000593486.1	4	+	156226149	156267521	5	156226149,156237887,156250860,156263411,156267448,	156226243,156237980,156251105,156263576,156267521,	ENSG00000250910.2	gene_id "ENSG00000250910.2"; transcript_id "ENST00000593486.1"; gene_type "antisense"; gene_status "NOVEL"; gene_name "AC097467.2"; transcript_type "antisense"; transcript_status "KNOWN"; transcript_name "AC097467.2-011"; level 2; tag "RNA_Seq_supported_only"; tag "basic"; havana_gene "OTTHUMG00000150212.2"; havana_transcript "OTTHUMT00000461392.1";	ENST00000593486.1		Antisense	ENSEMBL	670
p29306	0.353752	0.0472098	3.9024	up	2.89788	3.64421	3.24956	5.84187	5.93174	3.91112	0	GGGCCTCAAATGCTGAATAATGCTCCTGTTGGACTTCAGTAATTTTAAAAAATAAAACTG	ENST00000397787.1	21	-	46839630	46844955	3	46839630,46842326,46843684,	46841534,46842576,46844955,	ENSG00000183535.5	gene_id "ENSG00000183535.5"; transcript_id "ENST00000397787.1"; gene_type "processed_transcript"; gene_status "KNOWN"; gene_name "COL18A1-AS1"; transcript_type "processed_transcript"; transcript_status "KNOWN"; transcript_name "COL18A1-AS1-002"; level 2; tag "basic"; havana_gene "OTTHUMG00000090401.3"; havana_transcript "OTTHUMT00000269033.2";	NR_028082;RefSeq_665_3425	COL18A1-AS1	Intronic	ENSEMBL	3425
p33624	0.346721	0.0121527	2.37617	up	8.43869	7.96785	7.94026	9.64755	9.5519	8.89327	0	CTAGGATGATATGCATGTTTCAAGTGGTATTGAAAGCCGCACTGATGAATATGTAATAAT	TCONS_00026176	18	+	109064	122217	5	109064,116841,117042,118296,120700,	109453,116920,117304,118504,122217,	XLOC_012599	Gene_id=XLOC_012599;Gene_name=linc-USP14-2;Transcript_id=TCONS_00026176;Transcript_name=linc-USP14-2;	XLOC_012599		Intergenic	HumanLincRNACatalog	2455
p14988	0.351704	0.0426497	2.26604	up	7.72972	7.45605	7.42876	9.23423	8.96849	7.95234	0	GAGTGTGCAAAACAATCTGTAAGGGTTCAGAAAACATACTGCTTCTATATATAGTTACCT	ENST00000416650.1	7	-	77313259	77325579	3	77313259,77314518,77325488,	77313650,77314645,77325579,	ENSG00000214293.4	gene_id "ENSG00000214293.4"; transcript_id "ENST00000416650.1"; gene_type "processed_transcript"; gene_status "PUTATIVE"; gene_name "RSBN1L-AS1"; transcript_type "processed_transcript"; transcript_status "PUTATIVE"; transcript_name "RSBN1L-AS1-004"; level 1; tag "exp_conf"; havana_gene "OTTHUMG00000162596.1"; havana_transcript "OTTHUMT00000340794.1";	ENST00000416650.1	RSBN1L-AS1	Divergent	ENSEMBL	609
p26264	0.346721	0.00938316	10.5496	up	5.18073	4.49105	6.34912	8.91121	9.47326	7.83375	0	ATACACCTACCAGATTTCAAGCTATTGGATATTTCCCTTGTACAACCTTTACATCCTTTT	uc003hcu.1	4	+	62941883	62944051	1	62941883,	62944051,	BC039452	proteinID=;alignID=uc003hcu.1;kgID=uc003hcu.1;mRNA=BC039452;spID=;refseq=;protAcc=;description=Homo sapiens cDNA FLJ37384 fis, clone BRAMY2026347.;rfamAcc=;tRnaName=;	UCSC_4280_2168		Intergenic	UCSC	2168
p27855	0.348944	0.0260595	3.19602	up	6.19324	6.72325	5.409	8.09499	8.07569	7.18364	0	CAGCATCTATTTTGTGCAGTTTTTAGGGGCCTTGGAAATAAAAAGCTATGATTTCCAAAA	uc.472+	X	+	41379305	41379507	1	41379305,	41379507,	uc.472+	uc.472+	UCRs_462_202		Antisense	UCR	202
p16603	0.350328	0.0344757	2.77364	up	3.95877	3.2432	2.36561	4.62175	4.80926	4.55191	0	GGCCCACAGCAACAATAATAACTGTGGGGATGATATCATTTAATATTGAAAATAAGTGGA	ENST00000423637.1	9	-	117881817	117900688	6	117881817,117885075,117888585,117889228,117890025,117900368,	117881987,117885151,117888702,117889906,117890189,117900688,	ENSG00000236461.1	gene_id "ENSG00000236461.1"; transcript_id "ENST00000423637.1"; gene_type "lincRNA"; gene_status "NOVEL"; gene_name "RP11-523L1.2"; transcript_type "lincRNA"; transcript_status "KNOWN"; transcript_name "RP11-523L1.2-001"; level 2; tag "basic"; havana_gene "OTTHUMG00000020548.1"; havana_transcript "OTTHUMT00000053790.1";	ENCODE_397_1525;TCONS_00015874;XLOC_007834		Intergenic	ENSEMBL	1525
p35628_v4	0.346721	0.00842117	2.15643	up	5.42708	5.75625	5.61681	7.11309	6.41886	6.59412	0	CTAGAGAATGGCATGTGCAAAGATACAGAGCTTTTAGAAGTTGCCTGCATTCCTTGGCCC	TCONS_00019401	11	+	77850805	77852799	2	77850805,77852551,	77851118,77852799,	XLOC_009224	Gene_id=XLOC_009224;Gene_name=linc-USP35-1;Transcript_id=TCONS_00019401;Transcript_name=linc-USP35-1;	XLOC_009224		Divergent	HumanLincRNACatalog	561
p33709	0.350435	0.0353356	2.04269	up	5.8817	5.91075	5.38498	6.88908	7.16477	6.21499	0	GGCTACCCAACTTGTATAGCAAAGATTTCTGATAGTTTGTGTTCATCTCATGTGAATAAT	NR_037618.1	6	-	8013799	8102828	7	8013799,8026599,8041371,8062766,8090418,8097499,8102667,	8016061,8026658,8041501,8062849,8090514,8097700,8102828,	EEF1E1-MUTED	ID=rna13546;Name=NR_037618.1;Parent=gene11241;Dbxref=GeneID:100526837,Genbank:NR_037618.1;gbkey=misc_RNA;product=EEF1E1-MUTED readthrough;transcript_id=NR_037618.1|ID=gene11241;Name=EEF1E1-MUTED;Dbxref=GeneID:100526837;description=EEF1E1-MUTED readthrough;gbkey=Gene;gene=EEF1E1-MUTED	RefSeq_875_2992		Antisense	RefSeq	2992
p33932	0.348681	0.0207719	2.03749	up	11.7974	11.4612	11.4864	12.8365	12.89	12.0988	0	GCAGAAATAGGCCCTTTTATGTGTTGCTTCTATTTTACCTCAAATTGTAGATATAGGGTA	LIT2059	None	None	None	None	None	None	None	LIT2059	Accession=GTF2IP1;Description=Homo sapiens general transcription factor II, i, pseudogene 1 (GTF2IP1), misc RNA	CombinedLit_22_4313		Intergenic	RNAdb	4313
p30319	0.346721	0.0147692	2.51338	up	4.28492	4.1341	4.39371	6.2149	5.41325	5.17348	0	AAATTTGGTGGCTTCTCTTTGGTAGATCCAAGCTGTAATGCCACCCTTTACCAGTAGGTG	LIT3491	None	None	None	None	None	None	None	LIT3491	Accession=AY927475;Description=Homo sapiens mRNA sequence	LIT3491		Intergenic	RNAdb	623
p42710_v4	0.346721	0.0141811	3.66487	up	4.48248	3.69777	4.00971	6.4243	6.21828	5.16866	0	TTAATGTTTACATAAAGGCAAAAGTATAAGTAAACAATGTAGGCTGTTCCCTCCCTAACC	XR_245446.2	13	-	76177624	76210130	3	76177624,76192905,76209964,	76179081,76193042,76210130,	none					RefSeq	1760
p10109	0.34911	0.0301601	4.25408	up	3.52763	2.25941	2.2426	5.69112	4.45033	4.15474	0	GAGGCAAGAAAGATTTGCATCTTCTACCACTGCTAAATAGCAGTGACGCCTCTGAGATAC	ENST00000436820.1	2	+	175193499	175195270	2	175193499,175193700,	175193564,175195270,	ENSG00000231453.1	gene_id "ENSG00000231453.1"; transcript_id "ENST00000436820.1"; gene_type "processed_transcript"; gene_status "NOVEL"; gene_name "AC018470.4"; transcript_type "processed_transcript"; transcript_status "KNOWN"; transcript_name "AC018470.4-002"; level 2; havana_gene "OTTHUMG00000154148.1"; havana_transcript "OTTHUMT00000334114.1";	TCONS_00003051;XLOC_001759;TCONS_00003052;XLOC_001759		Intergenic	ENSEMBL	1635
p23589	0.346721	0.0129035	3.75812	up	3.56957	4.2262	4.3895	6.02276	6.58555	5.30699	0	CCAGATGTTCCATCAGCACTTAAAACTCACATTTCAACACTTGATCTGAATTCCTCCAAA	TCONS_00012630	6	+	170340753	170348805	3	170340753,170342800,170347913,	170340916,170342872,170348805,	XLOC_005557	Gene_id=XLOC_005557;Gene_name=linc-FAM120B-8;Transcript_id=TCONS_00012630;Transcript_name=linc-FAM120B-8;	XLOC_005557		Intergenic	HumanLincRNACatalog	1127
p4672	0.348944	0.0242947	4.5033	up	2.03785	2.6311	3.1992	4.69976	5.73103	3.95031	0	CAAAATATTCTCCTTTCTCTCCCTGTAAGGGGAATTTGAAAATCGGATTTACTGGTTAAA	ENST00000557546.1	14	-	101142266	101146221	2	101142266,101146118,	101142885,101146221,	ENSG00000258717.1	gene_id "ENSG00000258717.1"; transcript_id "ENST00000557546.1"; gene_type "lincRNA"; gene_status "NOVEL"; gene_name "RP11-566J3.2"; transcript_type "lincRNA"; transcript_status "KNOWN"; transcript_name "RP11-566J3.2-001"; level 2; tag "basic"; havana_gene "OTTHUMG00000171593.1"; havana_transcript "OTTHUMT00000414346.1";	ENST00000557546.1		Intergenic	ENSEMBL	722
p2811	0.348944	0.0250617	2.30771	up	7.2707	6.92207	7.50537	8.77435	8.70466	7.83851	0	TTAGCTGAGGACATTTCATATATATGGATTTCACAGCTACACTCGATCCACGCCCCACAC	ENST00000529934.1	11	+	67818206	67820852	3	67818206,67820446,67820825,	67818399,67820552,67820852,	ENSG00000255031.1	gene_id "ENSG00000255031.1"; transcript_id "ENST00000529934.1"; gene_type "processed_transcript"; gene_status "PUTATIVE"; gene_name "RP11-802E16.3"; transcript_type "processed_transcript"; transcript_status "PUTATIVE"; transcript_name "RP11-802E16.3-003"; level 1; tag "exp_conf"; havana_gene "OTTHUMG00000167383.2"; havana_transcript "OTTHUMT00000394452.1";	ENST00000529934.1		Antisense	ENSEMBL	326
p33665	0.351166	0.0409005	3.14779	up	4.45405	4.44029	3.46643	5.87259	6.49967	4.95152	0	ATCTAAAAGTATGAGGTCAAAGGATCACGAAACCTAAGTTTAAAAACTGCTTAGAGACTG	NR_024597.1	11	+	86013252	86056985	5	86013252,86048420,86055644,86056135,86056625,	86013520,86048572,86055763,86056240,86056985,	C11orf73	ID=rna25162;Name=NR_024597.1;Parent=gene21118;Dbxref=GeneID:51501,Genbank:NR_024597.1,HGNC:26938,HPRD:13701;gbkey=misc_RNA;product=chromosome 11 open reading frame 73%2C transcript variant 3;transcript_id=NR_024597.1|ID=gene21118;Name=C11orf73;Dbxref=GeneID:51501,HGNC:26938,HPRD:13701;description=chromosome 11 open reading frame 73;gbkey=Gene;gene=C11orf73;gene_synonym=Hikeshi,HSPC138,HSPC179,L7R…	UCSC:uc010rto.2		Antisense	RefSeq	1004
p8101	0.351166	0.0406988	2.45871	up	3.30615	3.56467	4.64818	5.01464	4.97456	5.4235	0	TGTGAGAATGAAACATTAATTCCCCTTCTCCACCTCATATGAGAAATGTGAATTGTCTTT	ENST00000566810.1	18	+	77827255	77839140	4	77827255,77829797,77837588,77838682,	77827308,77829906,77837710,77839140,	ENSG00000261126.2	gene_id "ENSG00000261126.2"; transcript_id "ENST00000566810.1"; gene_type "processed_transcript"; gene_status "NOVEL"; gene_name "RP11-795F19.1"; transcript_type "lincRNA"; transcript_status "KNOWN"; transcript_name "RP11-795F19.1-001"; level 2; havana_gene "OTTHUMG00000176254.2"; havana_transcript "OTTHUMT00000431702.1";	ENST00000566810.1		Intergenic	ENSEMBL	742
p13797	0.348944	0.0271295	2.4755	up	3.74339	3.08599	3.76674	4.94177	5.32271	4.2548	0	GCTTTTTGTGATTACACCTCTTGAGTCCTGCATGCTCAATATACCACTTGTGTATACACA	ENST00000513926.1	5	+	95583479	95614455	2	95583479,95614291,	95583721,95614455,	ENSG00000250158.1	gene_id "ENSG00000250158.1"; transcript_id "ENST00000513926.1"; gene_type "lincRNA"; gene_status "NOVEL"; gene_name "RP11-254I22.2"; transcript_type "lincRNA"; transcript_status "KNOWN"; transcript_name "RP11-254I22.2-001"; level 2; tag "basic"; havana_gene "OTTHUMG00000162824.1"; havana_transcript "OTTHUMT00000370577.1";	TCONS_00009465;XLOC_004479		Intergenic	ENSEMBL	406
p11710	0.348733	0.0217112	5.60909	up	2.4877	1.9984	2.58736	5.13393	5.81026	3.59258	0	GAACAACGAAACAACGGATGATCTGCCTTTAATAGGATAAAAGCCAGTATTTGCAAATAT	ENST00000414438.1	3	+	6532420	6625777	3	6532420,6619731,6625318,	6532629,6619824,6625777,	ENSG00000189229.10	gene_id "ENSG00000189229.10"; transcript_id "ENST00000414438.1"; gene_type "processed_transcript"; gene_status "NOVEL"; gene_name "AC069277.2"; transcript_type "processed_transcript"; transcript_status "KNOWN"; transcript_name "AC069277.2-006"; level 2; havana_gene "OTTHUMG00000154923.2"; havana_transcript "OTTHUMT00000337617.1";	TCONS_00005490;XLOC_002569;TCONS_00005491;XLOC_002569		Intergenic	ENSEMBL	761
p25729	0.35359	0.0449776	2.27466	up	6.23115	6.0536	5.74788	7.28003	7.8205	6.48905	0	ATTATTTATAGGTTCTAGTGCATCAAAGTCCTCCTGGCTCAATCCTTGACCACGCTGGAG	uc009xrv.1	10	-	80928942	80930381	1	80928942,	80930381,	BC128552	proteinID=;alignID=uc009xrv.1;kgID=uc009xrv.1;mRNA=BC128552;spID=;refseq=;protAcc=;description=Homo sapiens cDNA clone IMAGE:40121915.;rfamAcc=;tRnaName=;	UCSC_7363_1439		Intronic	UCSC	1439
p25088	0.346721	0.00919095	3.1813	up	2.75137	3.5748	3.01131	5.22502	4.78763	4.33368	0	TGCCTTACTGCCATTATTTGCTGAGTATTTCCAGATGGAACTGTAGTTGATAGCCAATAA	XR_132648.1	18	+	29265048	29266701	2	29265048,29265099,	29265066,29266701,	LOC646778	ID=rna36495;Name=XR_132648.1;Parent=gene30514;Dbxref=GeneID:646778,Genbank:XR_132648.1;gbkey=misc_RNA;product=uncharacterized LOC646778;transcript_id=XR_132648.1|ID=gene30514;Name=LOC646778;Dbxref=GeneID:646778;gbkey=Gene;gene=LOC646778	XR_132648.1		Divergent	RefSeq	1620
p41650_v4	0.346721	0.00616674	3.70862	up	3.5715	4.22278	3.62019	5.46994	6.27205	5.34512	0	TTGAATATGGCAGAGCCAGAAAATGCAAGGAGCTTCTTCTCTGGATCACCACTTGAAGAA	XR_428402.1	8	-	128301920	128433588	3	128301920,128335259,128433073,	128302305,128335399,128433588,	none					RefSeq	1040
p16731	0.350435	0.0349088	2.16039	up	4.46362	4.86324	4.88695	6.14485	6.20547	5.19735	0	TTCACAGCTGTATCTCAGATAGCCAGACTTATTCCAAAATCGGGACTCCAAGCCTTCAAA	ENST00000425533.1	9	+	32552345	32566927	3	32552345,32565394,32566388,	32552477,32565626,32566927,	ENSG00000235453.3	gene_id "ENSG00000235453.3"; transcript_id "ENST00000425533.1"; gene_type "processed_transcript"; gene_status "NOVEL"; gene_name "TOPORS-AS1"; transcript_type "processed_transcript"; transcript_status "KNOWN"; transcript_name "TOPORS-AS1-003"; level 2; havana_gene "OTTHUMG00000019742.2"; havana_transcript "OTTHUMT00000052005.1";	ENST00000425533.1	TOPORS-AS1	Antisense	ENSEMBL	903
p9150	0.348479	0.0202277	2.69678	up	6.18129	6.5673	6.98551	7.927	8.57378	7.52704	0	AAATTCTAGTGGACTGGCTAGTTCAGAAAATGGACCAGCCAGGTTTGCTTAAATGCACCC	ENST00000542553.1	2	-	61368731	61369778	1	61368731,	61369778,	ENSG00000212978.4	gene_id "ENSG00000212978.4"; transcript_id "ENST00000542553.1"; gene_type "processed_transcript"; gene_status "NOVEL"; gene_name "AC016747.3"; transcript_type "processed_transcript"; transcript_status "KNOWN"; transcript_name "AC016747.3-201"; level 3; havana_gene "OTTHUMG00000152156.3";	ENST00000542553.1		Intergenic	ENSEMBL	1047
p40228_v4	0.346721	0.00694296	3.13911	up	4.65377	4.86687	4.18994	6.19698	6.67157	5.79309	0	CAGCCAATTTTTCAAGAAACCCTATTACCTTTTAATGTTTCCTTCAATGAGATCAAGAGC	XR_241595.1	3	-	150283601	150321019	2	150283601,150320730,	150284893,150321019,	none					RefSeq	1581
p6739	0.346721	0.0144382	2.11814	up	5.05644	5.3367	5.37052	6.43327	6.70064	5.87816	0	AAGTATTCTCCAGCCACATCATTTGTTAGTAGTTTGACCTGCATAGGAGGGCACTGTCAC	ENST00000577309.1	17	-	21359824	21363527	1	21359824,	21363527,	ENSG00000265043.1	gene_id "ENSG00000265043.1"; transcript_id "ENST00000577309.1"; gene_type "lincRNA"; gene_status "KNOWN"; gene_name "RP11-728E14.3"; transcript_type "lincRNA"; transcript_status "KNOWN"; transcript_name "RP11-728E14.3-001"; level 2; tag "basic"; havana_gene "OTTHUMG00000175986.2"; havana_transcript "OTTHUMT00000431348.2";	ENST00000577309.1		Intergenic	ENSEMBL	3703
p26846	0.348246	0.0201841	3.23346	up	2.71305	2.15646	2.68834	5.04029	3.74367	3.85312	0	TCACCCAATCTGATTTCCACTGTTAGTGACTTCATAAACAATTGTCCCAGAGACTTTTTT	HIT000061972	5	+	9121790	9122074	1	9121790,	9122074,	HIX0032160	None	H-InvDB_2222_283		Intronic	H-InvDB	284
p37496_v4	0.351166	0.0410327	4.97092	up	4.40941	2.55913	3.52742	6.20739	6.53288	4.69622	0	GGAAATGAAGGCACCATTTAACAAACGTGTTCTGAATCATAATTTTCATGAGTTTGTACG	ENST00000608133.1	3	+	175527551	175528340	1	175527551,	175528340,	ENSG00000273193.1	gene_id "ENSG00000273193.1"; transcript_id "ENST00000608133.1"; gene_type "lincRNA"; gene_status "NOVEL"; gene_name "RP11-523G9.3"; transcript_type "lincRNA"; transcript_status "KNOWN"; transcript_name "RP11-523G9.3-001"; level 2; tag "basic"; havana_gene "OTTHUMG00000186056.1"; havana_transcript "OTTHUMT00000472141.1";			Intergenic	ENSEMBL	789
p8100	0.346721	0.00624432	2.27907	up	3.7111	3.93258	4.15624	5.40985	5.18073	4.77467	0	CAAAATCTGGAGATAATTATTATCCACAATTCTAAGGCCTTAGGCCCCTCCGCATGAGCC	ENST00000564686.1	18	+	77826910	77853362	4	77826910,77829797,77837588,77853167,	77827045,77829906,77837710,77853362,	ENSG00000261126.2	gene_id "ENSG00000261126.2"; transcript_id "ENST00000564686.1"; gene_type "processed_transcript"; gene_status "NOVEL"; gene_name "RP11-795F19.1"; transcript_type "lincRNA"; transcript_status "KNOWN"; transcript_name "RP11-795F19.1-002"; level 2; havana_gene "OTTHUMG00000176254.2"; havana_transcript "OTTHUMT00000431701.1";	ENST00000564686.1		Intergenic	ENSEMBL	561
p6007	0.346721	0.0147472	2.87947	up	5.02113	4.19628	4.52118	6.52209	6.22983	5.56409	0	ATGTTAGGTCAGAAGCAAATTGTTTTACCTTAAGAGTTTCAAGTGTACCATCTTCTTTGG	ENST00000566770.1	16	-	50134249	50155854	3	50134249,50140454,50155729,	50134681,50140563,50155854,	ENSG00000260381.2	gene_id "ENSG00000260381.2"; transcript_id "ENST00000566770.1"; gene_type "antisense"; gene_status "NOVEL"; gene_name "RP11-429P3.5"; transcript_type "antisense"; transcript_status "KNOWN"; transcript_name "RP11-429P3.5-001"; level 2; tag "basic"; havana_gene "OTTHUMG00000173451.1"; havana_transcript "OTTHUMT00000423146.1";	ENST00000566770.1		Antisense	ENSEMBL	666
p39863_v4	0.346721	0.0155816	3.65825	up	2.45568	2.70182	2.1391	4.16309	5.11419	3.63276	0	ACCAGTACAGGAAGATCATTCCTTAAAAGAAATAGCCATATGGCTTATAAGTGTTCTTTC	NR_110200.1	2	+	136742745	136762807	4	136742745,136756256,136758008,136762562,	136743086,136756408,136758049,136762807,	none					RefSeq	779
p2070	0.350581	0.0378351	2.35223	up	6.66221	6.81182	5.97104	7.99969	8.051	7.09647	0	GTAGCTAAGGCCTGGCTGTAGCAGTTATAAACTGTTCTGCAAGTGCGGGAAGTAATAGTT	ENST00000432120.1	10	+	96337195	96370995	2	96337195,96370557,	96337402,96370995,	ENSG00000244332.1	gene_id "ENSG00000244332.1"; transcript_id "ENST00000432120.1"; gene_type "processed_transcript"; gene_status "NOVEL"; gene_name "RP11-119K6.6"; transcript_type "processed_transcript"; transcript_status "KNOWN"; transcript_name "RP11-119K6.6-001"; level 2; tag "basic"; havana_gene "OTTHUMG00000018792.1"; havana_transcript "OTTHUMT00000049474.1";	ENST00000432120.1		Antisense	ENSEMBL	645
p6644	0.346721	0.0121731	2.44867	up	3.70781	3.58163	3.71631	5.37142	5.11927	4.39106	0	AGAAAATCATGACGTTACATGTCTATACAAGATTTAGAAAGCTCCAGACGAGACTAGTAG	ENST00000575593.1	17	-	3505054	3505566	1	3505054,	3505566,	ENSG00000261916.1	gene_id "ENSG00000261916.1"; transcript_id "ENST00000575593.1"; gene_type "sense_intronic"; gene_status "NOVEL"; gene_name "RP11-235E17.4"; transcript_type "sense_intronic"; transcript_status "KNOWN"; transcript_name "RP11-235E17.4-001"; level 2; tag "basic"; havana_gene "OTTHUMG00000177652.1"; havana_transcript "OTTHUMT00000438264.1";	ENST00000575593.1		Sense	ENSEMBL	512
p13491	0.34911	0.0332132	5.9248	up	5.27383	5.59742	4.22497	8.91715	7.29179	6.58758	0	CTCCTGTTGCTTGAGTTGGTTCTGCAAATCAGTTATTTTTTGAAGAAAAGAAACTGTGAT	ENST00000521666.1	5	-	162910070	162921040	2	162910070,162920448,	162910278,162921040,	ENSG00000251018.2	gene_id "ENSG00000251018.2"; transcript_id "ENST00000521666.1"; gene_type "antisense"; gene_status "NOVEL"; gene_name "RP11-80G7.1"; transcript_type "antisense"; transcript_status "KNOWN"; transcript_name "RP11-80G7.1-001"; level 2; tag "basic"; havana_gene "OTTHUMG00000163557.1"; havana_transcript "OTTHUMT00000374168.1";	ENST00000521666.1		Antisense	ENSEMBL	800
p33455	0.351166	0.0406704	2.40953	up	4.31492	5.14403	4.22636	6.02956	6.2382	5.22382	0	CCTAGGGGTTCATAGAAAAAGGAAGTTTGCAGATGCAATAAATGTGAGGAAGTATTTAAT	ENST00000575471.1	16	+	31923174	31928172	1	31923174,	31928172,	ENSG00000262657.1	gene_id "ENSG00000262657.1"; transcript_id "ENST00000575471.1"; gene_type "3prime_overlapping_ncrna"; gene_status "NOVEL"; gene_name "RP11-170L3.8"; transcript_type "3prime_overlapping_ncrna"; transcript_status "KNOWN"; transcript_name "RP11-170L3.8-001"; level 2; tag "basic"; havana_gene "OTTHUMG00000176536.7"; havana_transcript "OTTHUMT00000438895.6";	ENST00000575471.1		Antisense	ENSEMBL	4998
p18032	0.351938	0.0428825	2.17265	up	3.46234	3.58005	4.54838	4.94975	5.28678	4.71262	0	TGACCTCTACTCACAATGGGCTTCCGTCTGCCCAGTAGAGCCTTCTCTGGGTGCACAGAT	TCONS_00018648	10	-	133664309	133665914	2	133664309,133665431,	133664390,133665914,	XLOC_008999	Gene_id=XLOC_008999;Gene_name=linc-TCERG1L-4;Transcript_id=TCONS_00018648;Transcript_name=linc-TCERG1L-4;	XLOC_008999		Intergenic	HumanLincRNACatalog	564
p38237_v4	0.350581	0.0384631	2.14088	up	3.45374	3.44243	3.64003	4.59661	5.23311	4.00109	0	CTTCAGGCAGTGATCCAGATTATTCAGAGCAGAAAGCTGCTTGGGCTCTGATTACAGAAA	ENST00000608264.1	9	+	137033890	137034462	1	137033890,	137034462,	ENSG00000273473.1	gene_id "ENSG00000273473.1"; transcript_id "ENST00000608264.1"; gene_type "lincRNA"; gene_status "KNOWN"; gene_name "LL09NC01-139C3.1"; transcript_type "lincRNA"; transcript_status "KNOWN"; transcript_name "LL09NC01-139C3.1-001"; level 2; tag "basic"; havana_gene "OTTHUMG00000186052.1"; havana_transcript "OTTHUMT00000472136.1";			Intergenic	ENSEMBL	572
p29511	0.346721	0.00407168	2.54462	up	3.2567	3.44596	3.80951	5.16739	4.73249	4.65463	0	CTGCAATATTCTTCTTTGGGAAGTACAATGCCAAGTAAATAAAGATATTTGGGGTCATTC	ENST00000531565.1	8	+	144778323	144780583	2	144778323,144780108,	144779811,144780583,	ENSG00000181097.5	gene_id "ENSG00000181097.5"; transcript_id "ENST00000531565.1"; gene_type "antisense"; gene_status "NOVEL"; gene_name "RP11-429J17.2"; transcript_type "antisense"; transcript_status "KNOWN"; transcript_name "RP11-429J17.2-001"; level 2; tag "basic"; havana_gene "OTTHUMG00000165147.1"; havana_transcript "OTTHUMT00000382201.1";	ENST00000531565.1		Antisense	ENSEMBL	1963
p10727	0.348733	0.02136	3.17811	up	5.59965	5.03664	5.50412	7.54683	7.38392	6.21415	0	TTTCTGTATTAGTCACACACGTGATCCTAAAGTCTGTCTTCCCCACTTTAACTGGGGAGG	ENST00000411998.1	21	-	34636177	34638565	2	34636177,34638367,	34638207,34638565,	ENSG00000223799.1	gene_id "ENSG00000223799.1"; transcript_id "ENST00000411998.1"; gene_type "processed_transcript"; gene_status "NOVEL"; gene_name "AP000295.7"; transcript_type "processed_transcript"; transcript_status "KNOWN"; transcript_name "AP000295.7-001"; level 2; tag "basic"; havana_gene "OTTHUMG00000065125.1"; havana_transcript "OTTHUMT00000139822.1";	ENST00000411998.1	AP000295.7	Antisense	ENSEMBL	2228
p29030	0.346721	0.00889349	4.17357	up	1.99179	1.81186	2.38057	4.76459	4.21238	3.39109	0	GCGTGCTTCTACATCCAGTTTATACACAGCTCTATACAATATACAGAAACCTTTATATAC	ENST00000536405.1	11	-	61513964	61525121	6	61513964,61514822,61516014,61523106,61524554,61524960,	61514613,61514935,61517214,61523168,61524835,61525121,	ENSG00000124915.6	gene_id "ENSG00000124915.6"; transcript_id "ENST00000536405.1"; gene_type "lincRNA"; gene_status "NOVEL"; gene_name "RP11-467L20.10"; transcript_type "lincRNA"; transcript_status "KNOWN"; transcript_name "RP11-467L20.10-002"; level 2; tag "basic"; havana_gene "OTTHUMG00000168170.1"; havana_transcript "OTTHUMT00000398572.1";	ENST00000536405.1		Intergenic	ENSEMBL	2466
p12941	0.348944	0.0242302	11.1172	up	3.80403	3.02927	3.5393	7.30475	8.37316	5.11886	0	TCATCAGCAGTCACTTGACTTTCCTTGGATTTCTCAACTGCAGTAGTCACATGGTCTGCT	ENST00000598252.1	4	+	156226118	156281498	5	156226118,156267448,156275360,156278240,156281436,	156226303,156267712,156275525,156278354,156281498,	ENSG00000250910.2	gene_id "ENSG00000250910.2"; transcript_id "ENST00000598252.1"; gene_type "antisense"; gene_status "NOVEL"; gene_name "AC097467.2"; transcript_type "antisense"; transcript_status "KNOWN"; transcript_name "AC097467.2-005"; level 2; tag "RNA_Seq_supported_only"; tag "basic"; havana_gene "OTTHUMG00000150212.2"; havana_transcript "OTTHUMT00000461387.1";	ENST00000598252.1		Antisense	ENSEMBL	790
RNA146927|p0031_imsncRNA75	0.348944	0.0276725	2.74979	up	3.19081	3.38669	4.21882	5.12858	5.52892	4.51678	0	CCTAAGATGAACCAAAATGTATCACTTGGTCTGAAAAGATTATCACTGTGGCTTATTTTG	RNA146927|p0031_imsncRNA75													unpublished data	NA
p28307	0.353608	0.0469555	2.12918	up	4.15854	3.74928	3.03562	5.12118	4.64513	4.44802	0	TGTGATGAAGAAAGAGTGGGTGTAACCCAGCACTCTAAAATGTGTTTGACCTGTAAAAAA	ASO3528	None	None	None	None	None	None	None	ASO3528	Accession=AL832142;Description=Homo sapiens mRNA; cDNA DKFZp686A22111 (from clone DKFZp686A22111).	asoverlaps_1_7243			RNAdb	7243
p27414	0.34911	0.0283671	2.12943	up	5.73536	5.74316	4.93659	6.78292	6.70698	6.19663	0	CTGCACAGGGCTTTTTTAATCATAATGCATTTGTAATATAGCACTTTGATCTTCTCCTTG	uc.105-	2	-	174989786	174990009	1	174989786,	174990009,	uc.105-	uc.105-	uc.105-		Intronic	UCR	223
p12401	0.354588	0.0485243	3.78046	up	2.81416	3.19788	2.38752	4.94383	5.70127	3.51014	0	TGAGTTTTCCTGTGAAGCAGGAAAGAGTTTAACAATTCACGGTTGCACAGTAGCGCTAGC	ENST00000499713.2	4	-	110268630	110335566	8	110268630,110278198,110283907,110317349,110326805,110327729,110332459,110335413,	110268787,110278716,110283942,110317435,110326929,110327839,110332709,110335566,	ENSG00000247950.2	gene_id "ENSG00000247950.2"; transcript_id "ENST00000499713.2"; gene_type "processed_transcript"; gene_status "NOVEL"; gene_name "SEC24B-AS1"; transcript_type "processed_transcript"; transcript_status "KNOWN"; transcript_name "SEC24B-AS1-001"; level 2; tag "basic"; havana_gene "OTTHUMG00000161048.2"; havana_transcript "OTTHUMT00000363574.2";	uc003hzi.1;UCSC_7389_1433	SEC24B-AS1	Intergenic	ENSEMBL	1433
p7346	0.348944	0.0258214	2.92577	up	2.04528	2.41774	3.17427	4.39598	4.39345	3.49431	0	TTGTTTAACTTTTCGTGTTAGCGAAATTCACAAATTTGACCAAGGAACCGGAGCGCGGCC	ENST00000563897.1	17	+	36858704	36861000	1	36858704,	36861000,	ENSG00000261005.1	gene_id "ENSG00000261005.1"; transcript_id "ENST00000563897.1"; gene_type "lincRNA"; gene_status "NOVEL"; gene_name "CTB-58E17.1"; transcript_type "lincRNA"; transcript_status "KNOWN"; transcript_name "CTB-58E17.1-001"; level 2; tag "basic"; havana_gene "OTTHUMG00000176036.1"; havana_transcript "OTTHUMT00000431409.1";	ENST00000563897.1	CTB-58E17.1	Intergenic	ENSEMBL	2296
p7064	0.34911	0.0282755	3.41941	up	4.96967	4.97706	4.72904	7.03655	7.32427	5.63619	0	GCAGCGTGCAAAGTAGACATCCATAGTGTCTTTTGAAAAATGAAAAACACATTACTTTGA	ENST00000589217.1	17	-	76103478	76107880	2	76103478,76105131,	76103921,76107880,	ENSG00000204282.3	gene_id "ENSG00000204282.3"; transcript_id "ENST00000589217.1"; gene_type "processed_transcript"; gene_status "NOVEL"; gene_name "RP11-153A23.6"; transcript_type "antisense"; transcript_status "KNOWN"; transcript_name "RP11-153A23.6-001"; level 2; tag "basic"; havana_gene "OTTHUMG00000177654.1"; havana_transcript "OTTHUMT00000438267.1";	ENST00000589217.1		Antisense	ENSEMBL	3192
RNA33668|snoRNA_scaRNA_264_78	0.346721	0.0160183	2.01523	up	4.70499	5.26105	4.56542	5.6454	5.80937	6.10952	0	ATGTATTCTGAATCTAAAGTTGATTATTACTACTTTAGCTCTAGAATTACTCTGAGACCT	RNA33668|snoRNA_scaRNA_264_78													ftp://ftp.ensembl.org/pub/current/fasta/homo_sapiens/ncrna/Homo_sapiens.GRCh37.61.ncrna.fa.gz	NA
p6423	0.346721	0.00366413	5.30227	up	5.66102	5.67233	5.81785	8.58302	8.44333	7.34468	0	TTCTTCTATGCCAGCTCTGTCTTCTCTACACTTCCTCTGGAGGAGTAGGCCTTGACACAA	ENST00000566383.1	16	+	53407404	53418171	3	53407404,53412403,53418085,	53407789,53412516,53418171,	ENSG00000261804.1	gene_id "ENSG00000261804.1"; transcript_id "ENST00000566383.1"; gene_type "lincRNA"; gene_status "NOVEL"; gene_name "RP11-44F14.2"; transcript_type "lincRNA"; transcript_status "KNOWN"; transcript_name "RP11-44F14.2-001"; level 2; havana_gene "OTTHUMG00000173195.1"; havana_transcript "OTTHUMT00000422365.1";	ENST00000566383.1		Intergenic	ENSEMBL	584
p34010_v4	0.346721	0.00235034	2.74038	up	4.15088	3.87697	3.84652	5.64218	5.55603	5.0393	0	TTCCTTAGTCCCAGGATACACTTTGTGTGGAATCCACAGATCTGCCCTGATGATCATGAA	ENST00000415582.1	1	-	201969228	201970411	2	201969228,201970138,	201969455,201970411,	ENSG00000234678.1	gene_id "ENSG00000234678.1"; transcript_id "ENST00000415582.1"; gene_type "antisense"; gene_status "NOVEL"; gene_name "RP11-465N4.4"; transcript_type "antisense"; transcript_status "KNOWN"; transcript_name "RP11-465N4.4-001"; level 2; tag "basic"; havana_gene "OTTHUMG00000035865.1"; havana_transcript "OTTHUMT00000087343.1";	ENST00000415582.1		Antisense	ENSEMBL	500
p37263_v4	0.348733	0.0221101	2.60781	up	4.09961	4.86652	4.69231	5.68703	6.53617	5.58377	0	ATAACAAACAAGGGATCTATCGTGTGGTATAGAAGTTTACACAAAGAGGCATCTGATTTT	ENST00000609237.1	2	+	136751415	136758014	4	136751415,136753761,136756256,136757826,	136751555,136753978,136756408,136758014,	ENSG00000231890.3	gene_id "ENSG00000231890.3"; transcript_id "ENST00000609237.1"; gene_type "antisense"; gene_status "NOVEL"; gene_name "AC093391.2"; transcript_type "antisense"; transcript_status "KNOWN"; transcript_name "AC093391.2-022"; level 2; tag "basic"; havana_gene "OTTHUMG00000153578.3"; havana_transcript "OTTHUMT00000472737.1";			Antisense	ENSEMBL	697
p1226	0.346721	0.00570315	2.5125	up	3.63233	3.09657	3.3586	4.99167	4.74811	4.33508	0	ATTCCTATTGACATCTGCTGCAGATCACACCCTTGTGATGGACAAACTGCTCAGTACAGT	ENST00000422665.1	1	+	155170028	155175097	3	155170028,155170490,155174825,	155170102,155170617,155175097,	ENSG00000231064.1	gene_id "ENSG00000231064.1"; transcript_id "ENST00000422665.1"; gene_type "antisense"; gene_status "NOVEL"; gene_name "RP11-263K19.4"; transcript_type "antisense"; transcript_status "KNOWN"; transcript_name "RP11-263K19.4-005"; level 2; tag "basic"; havana_gene "OTTHUMG00000035709.1"; havana_transcript "OTTHUMT00000086854.1";	ENST00000422665.1		Antisense	ENSEMBL	473
p17494	0.349965	0.0342534	2.62046	up	4.65015	4.40496	3.88876	6.00583	6.15535	4.95216	0	GCATCTTTCTGTGCAGTCTTCGGAGAATATTTATTGTCTTCTTTGCACATTTGGAAATTT	TCONS_00001679	1	-	151120884	151123810	2	151120884,151122440,	151121236,151123810,	XLOC_001025	Gene_id=XLOC_001025;Gene_name=linc-SEMA6C-1;Transcript_id=TCONS_00001679;Transcript_name=linc-SEMA6C-1;	XLOC_001025		Intergenic	HumanLincRNACatalog	1722
p33666	0.346721	0.010042	3.60499	up	4.03137	4.22402	3.66078	5.9736	6.36786	5.1247	0	TAAAAGTATGAGGTCAAAGGATCACGAAACCTAAGTTTAAAAACTGCTTAGAGACTGAAG	NR_024596.1	11	+	86014397	86056985	6	86014397,86017286,86048420,86055644,86056135,86056625,	86014502,86017524,86048572,86055763,86056240,86056985,	C11orf73	ID=rna25164;Name=NR_024596.1;Parent=gene21118;Dbxref=GeneID:51501,Genbank:NR_024596.1,HGNC:26938,HPRD:13701;gbkey=misc_RNA;product=chromosome 11 open reading frame 73%2C transcript variant 2;transcript_id=NR_024596.1|ID=gene21118;Name=C11orf73;Dbxref=GeneID:51501,HGNC:26938,HPRD:13701;description=chromosome 11 open reading frame 73;gbkey=Gene;gene=C11orf73;gene_synonym=Hikeshi,HSPC138,HSPC179,L7R…	UCSC:uc001pbv.3		Antisense	RefSeq	1079
p8221	0.354588	0.0488862	2.33089	up	4.58262	3.46607	3.58492	5.10432	5.53745	4.65447	0	GTTACCTCCATTTCCACACTTTCCATTTAGGAAGCTAAGGCTTAAAAAGATGAAGCCCCT	ENST00000591150.1	19	-	19418029	19419666	1	19418029,	19419666,	ENSG00000267266.1	gene_id "ENSG00000267266.1"; transcript_id "ENST00000591150.1"; gene_type "sense_intronic"; gene_status "NOVEL"; gene_name "AC004475.1"; transcript_type "sense_intronic"; transcript_status "KNOWN"; transcript_name "AC004475.1-001"; level 2; tag "basic"; havana_gene "OTTHUMG00000182224.1"; havana_transcript "OTTHUMT00000460139.1";	ENST00000591150.1		Sense	ENSEMBL	1637
p42291_v4	0.351483	0.0425329	2.30106	up	6.18934	7.17479	6.02164	7.81478	7.90152	7.27637	0	GCTTCTGGTTAGAGTTCTAAGAAGGGAAACTGGCGTGAAAAACGTTTGTAAAAATGGACA	XR_428960.1	11	-	76489165	76494266	3	76489165,76493690,76494034,	76489251,76493900,76494266,	none					RefSeq	528
p41411_v4	0.346721	0.0079924	4.69578	up	1.97532	2.01997	3.05123	4.41059	5.14225	4.18778	0	ATCTTTTGGATTCTGACCAGTAAAAAACCTTAAACCATTTAGGAAATGGTTTCCCTTTCC	XR_428245.1	7	+	128103502	128109426	3	128103502,128106616,128108898,	128103542,128106739,128109426,	none					RefSeq	691
p10652	0.346721	0.0132935	2.29573	up	4.50329	4.49117	4.52516	5.6919	6.20194	5.22263	0	CTAGAAGATGAGGGCAATTAAGTCATGCGCCTCGGCAAGTTCATTAAAATGTTGACTTGC	ENST00000593307.1	20	+	61172803	61174520	1	61172803,	61174520,	ENSG00000264490.2	gene_id "ENSG00000264490.2"; transcript_id "ENST00000593307.1"; gene_type "lincRNA"; gene_status "KNOWN"; gene_name "WI2-87327B8.1"; transcript_type "lincRNA"; transcript_status "KNOWN"; transcript_name "WI2-87327B8.1-202"; level 3; havana_gene "OTTHUMG00000179711.1";	ENST00000593307.1	WI2-87327B8.1	Intergenic	ENSEMBL	1717
p38343_v4	0.346924	0.0194783	6.95313	up	1.67321	2.32602	2.38108	5.68773	5.5692	3.51637	0	GCGCGCACATTCCCAGGTTTGCAGAATGAAAATCAATAAAATCGATGCAGTGGCAAAGAA	ENST00000609182.1	10	-	77168730	77169084	1	77168730,	77169084,	ENSG00000273248.1	gene_id "ENSG00000273248.1"; transcript_id "ENST00000609182.1"; gene_type "lincRNA"; gene_status "NOVEL"; gene_name "RP11-399K21.13"; transcript_type "lincRNA"; transcript_status "KNOWN"; transcript_name "RP11-399K21.13-001"; level 2; tag "basic"; havana_gene "OTTHUMG00000186430.1"; havana_transcript "OTTHUMT00000473137.1";			Intergenic	ENSEMBL	354
p25985	0.346721	0.00416935	2.16396	up	6.65513	6.32398	6.2521	7.80125	7.44576	7.32522	0	CCATCCTCCCTACTCATGACTTTGATGAGTTATTGCTGTAACATCACTTCTTGATTTAAT	uc002efy.3	16	+	50139751	50140297	1	50139751,	50140297,	AF086132	proteinID=;alignID=uc002efy.3;kgID=uc002efy.3;mRNA=AF086132;spID=;refseq=;protAcc=;description=Homo sapiens full length insert cDNA clone ZA87H01.;rfamAcc=;tRnaName=;	uc002efy.3		Divergent	UCSC	546
p12018	0.346721	0.00988945	2.28054	up	3.59114	3.81976	4.33975	5.32257	4.86906	5.12715	0	AAGAATCAACAGGAAAGCCTAACATGACTTTCCAGTAACTGCCAAGTGTCCGAGATGCAA	ENST00000496491.1	3	+	149095564	149104370	2	149095564,149104154,	149096102,149104370,	ENSG00000240541.2	gene_id "ENSG00000240541.2"; transcript_id "ENST00000496491.1"; gene_type "antisense"; gene_status "NOVEL"; gene_name "TM4SF1-AS1"; transcript_type "antisense"; transcript_status "KNOWN"; transcript_name "TM4SF1-AS1-001"; level 1; tag "basic"; tag "exp_conf"; havana_gene "OTTHUMG00000159596.1"; havana_transcript "OTTHUMT00000356365.1";	TCONS_00005618;XLOC_002867	TM4SF1-AS1	Antisense	ENSEMBL	754
p3174	0.349241	0.0337029	2.4753	up	4.65892	5.02783	5.17073	6.56474	6.71569	5.49986	0	CTGGTTTGGGGATGTACATTGGCTGACAGCATCTAAGTTCTAAGAAGAAAGAAAAGTATA	ENST00000565518.1	12	-	52203488	52204384	1	52203488,	52204384,	ENSG00000260122.1	gene_id "ENSG00000260122.1"; transcript_id "ENST00000565518.1"; gene_type "lincRNA"; gene_status "NOVEL"; gene_name "RP11-923I11.3"; transcript_type "lincRNA"; transcript_status "KNOWN"; transcript_name "RP11-923I11.3-001"; level 2; tag "basic"; havana_gene "OTTHUMG00000172897.1"; havana_transcript "OTTHUMT00000421206.1";	ASO1937;asoverlaps_798_925		Intergenic	ENSEMBL	896
p11853	0.346721	0.00624029	3.20459	up	8.11978	7.87311	7.69652	9.64167	10.0514	9.03681	0	ACATCTGAATTTTGTTAGCAAGGAGTTCTTCTGTAGCTGCACGTTCTCTCTCAACTGCTG	ENST00000597950.1	3	+	69063134	69097715	3	69063134,69079015,69097338,	69063352,69079145,69097715,	ENSG00000244513.2	gene_id "ENSG00000244513.2"; transcript_id "ENST00000597950.1"; gene_type "antisense"; gene_status "NOVEL"; gene_name "CTD-2013N24.2"; transcript_type "antisense"; transcript_status "KNOWN"; transcript_name "CTD-2013N24.2-002"; level 2; tag "RNA_Seq_supported_only"; tag "basic"; havana_gene "OTTHUMG00000158770.2"; havana_transcript "OTTHUMT00000461511.1";	ENST00000597950.1	CTD-2013N24.2	Antisense	ENSEMBL	725
p8092	0.350435	0.0348257	3.69846	up	3.29928	2.3367	2.07999	4.35867	5.32278	3.6953	0	CTTCCACCACATTAGCAGTAACCTATTCTGAATGTGAGATTATAATTCCTATGTATCTCT	ENST00000586389.1	18	+	76877206	76877920	1	76877206,	76877920,	ENSG00000267655.1	gene_id "ENSG00000267655.1"; transcript_id "ENST00000586389.1"; gene_type "sense_intronic"; gene_status "NOVEL"; gene_name "CTD-2286N8.2"; transcript_type "sense_intronic"; transcript_status "KNOWN"; transcript_name "CTD-2286N8.2-001"; level 2; tag "basic"; havana_gene "OTTHUMG00000180261.1"; havana_transcript "OTTHUMT00000450498.1";	ENST00000586389.1	CTD-2286N8.2	Sense	ENSEMBL	714
p8718	0.346721	0.011752	4.84308	up	2.18614	2.7273	2.79677	5.07109	5.54297	3.92392	0	ATCATTAGGAGCTTCTTTTCCAATTCCTCTGTTTTGCATGCATTGGAAGGCCCCTGGATC	ENST00000438770.2	19	+	37742813	37754664	4	37742813,37746800,37753443,37754580,	37743084,37746884,37753557,37754664,	ENSG00000226686.2	gene_id "ENSG00000226686.2"; transcript_id "ENST00000438770.2"; gene_type "lincRNA"; gene_status "NOVEL"; gene_name "AC012309.5"; transcript_type "lincRNA"; transcript_status "KNOWN"; transcript_name "AC012309.5-002"; level 1; tag "exp_conf"; havana_gene "OTTHUMG00000048167.2"; havana_transcript "OTTHUMT00000458182.1";	ENCODE_2031_462		Intergenic	ENSEMBL	553
p30111	0.34911	0.0290782	2.33709	up	5.65636	5.41825	6.17037	6.9472	7.49319	6.47873	0	GGGGTAAAATTCTACTGCCTTTCCACGGACAAGTTAAACTGGCTGTAATGTTTATGCACT	XR_108434.3	2	+	160465680	160473599	3	160465680,160471767,160472257,	160465731,160471964,160473599,	LOC643072	ID=rna6333;Name=XR_108434.3;Parent=gene5162;Dbxref=GeneID:643072,Genbank:XR_108434.3;gbkey=misc_RNA;product=uncharacterized LOC643072;transcript_id=XR_108434.3|ID=gene5162;Name=LOC643072;Dbxref=GeneID:643072;gbkey=Gene;gene=LOC643072	XR_108434.3		Antisense	RefSeq	1590
p15538	0.346721	0.0131956	3.22944	up	2.36531	2.34378	3.23878	4.63917	4.57635	3.8062	0	CTTTAGAACAAGGACCTTTCCCTTTTGTGCATGAATACGCTCTCAGCAGATGCGAGAAAA	ENST00000438047.1	7	+	157647276	157658784	4	157647276,157648618,157649981,157655236,	157647567,157648822,157650240,157658784,	ENSG00000233038.1	gene_id "ENSG00000233038.1"; transcript_id "ENST00000438047.1"; gene_type "antisense"; gene_status "NOVEL"; gene_name "AC011899.9"; transcript_type "antisense"; transcript_status "KNOWN"; transcript_name "AC011899.9-001"; level 2; tag "basic"; havana_gene "OTTHUMG00000152644.1"; havana_transcript "OTTHUMT00000327104.1";	ENST00000438047.1		Antisense	ENSEMBL	4302
p26694	0.35077	0.0398772	2.83892	up	6.24059	6.14349	6.96815	8.65081	7.17352	8.04393	0	GGAAGGCAAATGTGGTAATTTATATCTCTGACAAGGGTGATAGGCCCATTTTATACATGG	HIT000327149	15	-	101456346	101456828	1	101456346,	101456828,	HIX0026794	None	H-InvDB_905_465		Antisense	H-InvDB	482
p27348	0.346721	0.00445909	3.16714	up	3.85082	4.11696	4.0643	5.76176	6.10217	5.1577	0	TCATTACTTGACACTTTATAGAACGGCTGCGTATTGATCGCACCTGTCATGTCCCATCTC	uc.453-	19	-	42437316	42437641	1	42437316,	42437641,	uc.453-	uc.453-	uc.453-		Intergenic	UCR	325
p23914	0.34911	0.0313007	4.1163	up	1.75349	2.7462	2.69139	4.92071	5.03139	3.36302	0	GGGCATCATTGAAGACTCACGTACTTTTACTGAGAAAGTGACATTGATCTCTGTAGATTT	TCONS_00014919	8	-	6262448	6264055	2	6262448,6264048,	6263892,6264055,	XLOC_006985	Gene_id=XLOC_006985;Gene_name=linc-CSMD1-1;Transcript_id=TCONS_00014919;Transcript_name=linc-CSMD1-1;	XLOC_006985		Divergent	HumanLincRNACatalog	1451
p3417	0.350581	0.0369427	2.50482	up	3.33993	4.42363	4.37125	5.40113	5.77918	4.92862	0	AAATGAGCCCCAAGAAGAGATCCTCTCCCTCTCTTGGGACATTTATCATCTTCTGTCACT	ENST00000536910.1	12	-	122337853	122338900	2	122337853,122338781,	122338168,122338900,	ENSG00000257020.1	gene_id "ENSG00000257020.1"; transcript_id "ENST00000536910.1"; gene_type "antisense"; gene_status "NOVEL"; gene_name "RP11-87C12.4"; transcript_type "antisense"; transcript_status "KNOWN"; transcript_name "RP11-87C12.4-001"; level 2; tag "basic"; havana_gene "OTTHUMG00000168947.1"; havana_transcript "OTTHUMT00000401699.1";	ENST00000536910.1		Antisense	ENSEMBL	434
p10943	0.347322	0.0197607	2.52474	up	3.39368	3.13549	3.72978	4.80177	5.26971	4.19588	0	CAAACATACTTAGTTCTGTCCCTGCAGAGCAGAGTAGAGCTCAATACACATCTTTGAACC	ENST00000426483.1	22	-	18559292	18560563	2	18559292,18560294,	18559828,18560563,	ENSG00000225335.1	gene_id "ENSG00000225335.1"; transcript_id "ENST00000426483.1"; gene_type "antisense"; gene_status "NOVEL"; gene_name "XXbac-B476C20.9"; transcript_type "antisense"; transcript_status "KNOWN"; transcript_name "XXbac-B476C20.9-001"; level 1; tag "basic"; tag "exp_conf"; havana_gene "OTTHUMG00000149968.1"; havana_transcript "OTTHUMT00000314642.1";	ENST00000426483.1	XXbac-B476C20.9	Antisense	ENSEMBL	805
p36876_v4	0.348944	0.0266907	2.38964	up	4.19241	3.49958	3.79565	5.69041	4.881	4.68662	0	CTCATCTTTGTCTTCAGAGGATAAATACAAGGCCTGACACATAACAAGCATGAGATTAAT	ENST00000445039.2	1	+	53793904	53802181	3	53793904,53796839,53801841,	53794047,53796923,53802181,	ENSG00000225675.2	gene_id "ENSG00000225675.2"; transcript_id "ENST00000445039.2"; gene_type "lincRNA"; gene_status "NOVEL"; gene_name "RP4-784A16.5"; transcript_type "lincRNA"; transcript_status "KNOWN"; transcript_name "RP4-784A16.5-001"; level 2; tag "basic"; havana_gene "OTTHUMG00000008948.2"; havana_transcript "OTTHUMT00000024802.2";			Intergenic	ENSEMBL	567
p20706	0.34911	0.0306484	2.62218	up	3.54213	4.38866	3.89173	5.51278	5.82022	4.66182	0	TCAGAAGGGGAGTGGTCTGAATCCACTCCTCCCCTTCCAGGGCAGGAAGTCAACAGAGAA	TCONS_00027003	19	+	35696058	35706774	4	35696058,35697055,35701775,35706537,	35696179,35697295,35701887,35706774,	XLOC_013049	Gene_id=XLOC_013049;Gene_name=linc-LSR-1;Transcript_id=TCONS_00027003;Transcript_name=linc-LSR-1;	XLOC_013049		Intergenic	HumanLincRNACatalog	710
p1630	0.350581	0.0368008	2.5627	up	5.70133	6.14148	6.16121	6.89352	8.18456	6.99894	0	TTGAAGTTCAACACTCCTCAATGAGCAGCTGTTCCGAGCTGTACAGCTTCTTCTTGATGA	ENST00000491934.2	10	-	74034672	74035738	2	74034672,74035457,	74035238,74035738,	ENSG00000269926.1	gene_id "ENSG00000269926.1"; transcript_id "ENST00000491934.2"; gene_type "antisense"; gene_status "NOVEL"; gene_name "RP11-442H21.2"; transcript_type "antisense"; transcript_status "KNOWN"; transcript_name "RP11-442H21.2-001"; level 2; tag "basic"; havana_gene "OTTHUMG00000018435.2"; havana_transcript "OTTHUMT00000048580.2";	ENST00000491934.2		Antisense	ENSEMBL	847
p35793_v4	0.348681	0.0208203	3.08936	up	7.47955	7.69862	7.60559	9.34403	9.907	8.41466	0	GCTGAAATTCATCCCAAGGCTGGTCTGCAAAGTCTGCAATTCATAATGGAGCTACTGTAC	TCONS_00024235	16	-	54952777	54962690	5	54952777,54954209,54957496,54959012,54962405,	54953121,54954322,54957562,54959125,54962690,	XLOC_011950	Gene_id=XLOC_011950;Gene_name=linc-IRX3-5;Transcript_id=TCONS_00024235;Transcript_name=linc-IRX3-5;	NR_034106.1;RefSeq_2891_921;XLOC_011950		Intergenic	HumanLincRNACatalog	921
p37356_v4	0.346721	0.00262411	2.16401	up	4.21748	4.55888	4.69297	5.43962	5.74349	5.62734	0	TTGTTTCAGAAGGTAATGAGAATTCGTTGCCAGGTCGTTAAACTTCGCTCCTTCCTGGAG	ENST00000415226.1	2	+	237076089	237203570	4	237076089,237168149,237186014,237203415,	237076312,237168242,237186095,237203570,	ENSG00000233611.3	gene_id "ENSG00000233611.3"; transcript_id "ENST00000415226.1"; gene_type "antisense"; gene_status "NOVEL"; gene_name "AC079135.1"; transcript_type "antisense"; transcript_status "KNOWN"; transcript_name "AC079135.1-002"; level 2; tag "basic"; havana_gene "OTTHUMG00000153089.2"; havana_transcript "OTTHUMT00000329483.2";			Antisense	ENSEMBL	552
p8563	0.35077	0.0388712	2.07787	up	5.32921	5.77322	5.5441	6.7704	7.06318	5.97827	0	TAATATCTCCCGCTACGCGCGTTGTGACCAATGCTGCATACAGGAGATGAGGGAGGACGG	ENST00000440004.1	19	+	12305829	12348247	2	12305829,12347904,	12305958,12348247,	ENSG00000234773.2	gene_id "ENSG00000234773.2"; transcript_id "ENST00000440004.1"; gene_type "lincRNA"; gene_status "NOVEL"; gene_name "CTD-2666L21.1"; transcript_type "lincRNA"; transcript_status "KNOWN"; transcript_name "CTD-2666L21.1-002"; level 2; havana_gene "OTTHUMG00000156425.1"; havana_transcript "OTTHUMT00000344137.1";	ENST00000440004.1	CTD-2666L21.1	Intergenic	ENSEMBL	472
p43826_v4	0.346721	0.00760147	2.57671	up	3.74121	3.38197	2.99716	4.98939	4.81413	4.41341	0	TTTCCAAAACAGGAAAACAAGGAAGGCTGCCATCAGCAGGAATTCCAGGGCTTTCAGAAT	NR_103707.1	21	+	45925926	45936458	7	45925926,45926529,45927919,45928609,45929134,45929705,45935379,	45926211,45926982,45928192,45928812,45929289,45929810,45936458,	none					RefSeq	2553
p38381_v4	0.346721	0.00902233	3.61486	up	5.02994	5.31723	5.75746	7.85974	7.04246	6.76425	0	AGATCAGGACGGAATTCCAGAACAAGGATTTTGCTTGAAATAACATCACTACTAATTGTC	ENST00000607952.1	10	-	112234861	112255962	2	112234861,112255876,	112234984,112255962,	ENSG00000273143.1	gene_id "ENSG00000273143.1"; transcript_id "ENST00000607952.1"; gene_type "lincRNA"; gene_status "NOVEL"; gene_name "RP11-525A16.4"; transcript_type "lincRNA"; transcript_status "KNOWN"; transcript_name "RP11-525A16.4-002"; level 2; havana_gene "OTTHUMG00000186513.2"; havana_transcript "OTTHUMT00000473276.1";			Intergenic	ENSEMBL	209
p26302	0.346721	0.00709516	5.45212	up	6.03499	5.97951	5.29879	9.05752	7.79907	7.79716	0	GTTCTCCAGCTTAAGATCTTCTATCTCACTGGCTGTTAACGCTTTATAGCTTATTAAAAA	uc003lzi.3	5	-	162909609	162921064	4	162909609,162916256,162920448,162920704,	162910278,162916389,162920555,162921064,	BC035392	proteinID=;alignID=uc003lzi.3;kgID=uc003lzi.3;mRNA=BC035392;spID=;refseq=;protAcc=;description=Homo sapiens cDNA clone IMAGE:4822878.;rfamAcc=;tRnaName=;	ASO3615;asoverlaps_669_1283		Antisense	UCSC	1269
p38080_v4	0.351483	0.0424607	3.34042	up	3.06338	3.75496	3.34354	5.5759	5.78628	4.01978	0	CCCACTTCCTAGGCTCAGTCTTTGATCAATATTTATCATTATCACCAGTTATTGTTCTAA	ENST00000606853.1	8	-	6262926	6264063	1	6262926,	6264063,	ENSG00000246089.3	gene_id "ENSG00000246089.3"; transcript_id "ENST00000606853.1"; gene_type "antisense"; gene_status "NOVEL"; gene_name "RP11-115C21.2"; transcript_type "antisense"; transcript_status "KNOWN"; transcript_name "RP11-115C21.2-003"; level 2; tag "basic"; havana_gene "OTTHUMG00000163617.3"; havana_transcript "OTTHUMT00000470333.1";			Antisense	ENSEMBL	1137
p28298	0.348745	0.0224681	2.99009	up	7.66746	7.73644	7.58799	9.26347	9.98789	8.48109	0	TAAGCCTTGCAAAATGAGTTGATGTCAAAATGGCAAGTAGCCACTTTCTGTTTTAAACTA	ASO2248	None	None	None	None	None	None	None	ASO2248	Accession=L08437;Description=Human autonomously replicating sequence (ARS) mRNA.	asoverlaps_839_801		Antisense	RNAdb	801
p25911	0.346924	0.0195273	2.13917	up	6.17349	5.77871	6.06508	7.48443	7.23231	6.5917	0	CAGTTTGAGTATGGACAAAAATTCAATTAGAAGAAAGGATCCCAGAGGGGCTAATAATTT	uc021rum.1	14	+	64991470	64993875	1	64991470,	64993875,	AK055910	proteinID=;alignID=uc021rum.1;kgID=uc021rum.1;mRNA=AK055910;spID=;refseq=;protAcc=;description=Homo sapiens cDNA FLJ31348 fis, clone MESAN2000026.;rfamAcc=;tRnaName=;	uc021rum.1		Intronic	UCSC	2405
p14488	0.354729	0.0491899	24.6828	up	2.0737	1.44985	3.51887	8.39946	8.62151	3.89775	0	CATTTTGTTTCCCTCTGGAAACCACATGTGTACCTTGTTTGCAACAGTATGGGTATGGAT	ENST00000444265.1	6	+	22056774	22111157	2	22056774,22110975,	22056919,22111157,	ENSG00000238274.2	gene_id "ENSG00000238274.2"; transcript_id "ENST00000444265.1"; gene_type "lincRNA"; gene_status "NOVEL"; gene_name "LINC00340"; transcript_type "lincRNA"; transcript_status "KNOWN"; transcript_name "LINC00340-001"; level 2; tag "basic"; havana_gene "OTTHUMG00000014345.1"; havana_transcript "OTTHUMT00000039992.1";	ENCODE_2705_327	LINC00340	Intergenic	ENSEMBL	327
p889	0.34911	0.0308361	2.7093	up	3.91605	4.05766	3.97098	5.44736	6.16382	4.64727	0	TGGTGTACTCAGGAAAAGGAGACACCGTTATCTCTCCAATAAAGTCTGTATCTGATGACA	ENST00000602618.1	1	+	33726812	33727281	1	33726812,	33727281,	ENSG00000270115.1	gene_id "ENSG00000270115.1"; transcript_id "ENST00000602618.1"; gene_type "lincRNA"; gene_status "NOVEL"; gene_name "RP11-415J8.7"; transcript_type "lincRNA"; transcript_status "KNOWN"; transcript_name "RP11-415J8.7-001"; level 2; tag "basic"; havana_gene "OTTHUMG00000183926.1"; havana_transcript "OTTHUMT00000467535.1";	ENST00000602618.1		Intergenic	ENSEMBL	469
p43143_v4	0.346721	0.00807533	3.27571	up	2.35436	2.5691	2.58619	4.88426	4.00019	3.76063	0	ATTAAGAGAACCATCAATTAAGGAGGCAGTGCGCACCTCTCCAGGGAAATTTACTCCAGT	XR_243337.1	16	-	2916348	2917619	2	2916348,2917461,	2916857,2917619,	none					RefSeq	667
p37262_v4	0.351166	0.0409598	2.74097	up	3.67793	4.83393	4.87099	5.66386	6.49954	5.58352	0	ACAAACAAGGGATCTATCGTGTGGTATAGAAGTTTACACAAAGAGGCATCTGATTTTAAG	ENST00000609663.1	2	+	136751412	136758004	3	136751412,136756256,136757826,	136751447,136756408,136758004,	ENSG00000231890.3	gene_id "ENSG00000231890.3"; transcript_id "ENST00000609663.1"; gene_type "antisense"; gene_status "NOVEL"; gene_name "AC093391.2"; transcript_type "antisense"; transcript_status "KNOWN"; transcript_name "AC093391.2-021"; level 2; tag "basic"; havana_gene "OTTHUMG00000153578.3"; havana_transcript "OTTHUMT00000472736.1";			Antisense	ENSEMBL	365
p7152	0.346721	0.0133405	3.59396	up	4.60359	4.28463	5.17973	6.64003	7.07919	5.88547	0	TTCTTATCCTATTGAAAGCAAGACTTCCTATCCAATGGCAATACAAACTTTTACGCAGTA	ENST00000585181.1	17	+	8280392	8284646	2	8280392,8284362,	8280559,8284646,	ENSG00000265749.1	gene_id "ENSG00000265749.1"; transcript_id "ENST00000585181.1"; gene_type "processed_transcript"; gene_status "NOVEL"; gene_name "RP11-849F2.5"; transcript_type "lincRNA"; transcript_status "KNOWN"; transcript_name "RP11-849F2.5-004"; level 2; havana_gene "OTTHUMG00000178521.1"; havana_transcript "OTTHUMT00000442321.1";	ENST00000585181.1		Intergenic	ENSEMBL	451
p4646	0.34911	0.0305592	2.5892	up	5.18508	5.27921	5.6745	6.89106	7.34897	6.01627	0	AATTCATGATTTGATGGCTTCGAGGCTCAGCCTCAGTGCTATAGTACTGACAAGGAAGCT	ENST00000553435.1	14	-	95426613	95429313	5	95426613,95428246,95428574,95428845,95429215,	95426825,95428318,95428657,95429117,95429313,	ENSG00000258933.1	gene_id "ENSG00000258933.1"; transcript_id "ENST00000553435.1"; gene_type "lincRNA"; gene_status "NOVEL"; gene_name "RP11-991C1.1"; transcript_type "lincRNA"; transcript_status "KNOWN"; transcript_name "RP11-991C1.1-001"; level 2; tag "basic"; havana_gene "OTTHUMG00000171626.1"; havana_transcript "OTTHUMT00000414511.1";	ENST00000553435.1		Intergenic	ENSEMBL	737
p20117	0.348733	0.0215045	5.23181	up	2.43684	2.69957	2.49782	5.251	5.85812	3.68705	0	CAGGATGGCCAATTCAGAACTTCTTACTAGTGCTGAATTCAATAAAGGTTTAATAACACA	TCONS_00024522	16	+	89557733	89565716	2	89557733,89564493,	89557794,89565716,	XLOC_011834	Gene_id=XLOC_011834;Gene_name=linc-SPG7-1;Transcript_id=TCONS_00024522;Transcript_name=linc-SPG7-1;	XLOC_011834		Divergent	HumanLincRNACatalog	1284
p36489_v4	0.346721	0.0132553	5.33028	up	3.91124	4.7793	3.11266	6.91046	6.2694	5.86599	0	AAGAAGAAGATAGTTTTGGGATAGATAGAGGGTCCTTAGACAAGGTGCAAGACAAACAGA	uc004aut.1	9	+	97317422	97330409	3	97317422,97321165,97329671,	97317627,97321434,97330409,	BC080653	proteinID=;alignID=uc004aut.1;kgID=uc004aut.1;mRNA=BC080653;spID=;refseq=;protAcc=;description=Homo sapiens cDNA FLJ41071 fis, clone 3NB692003538.;rfamAcc=;tRnaName=;	uc004aut.1		Antisense	UCSC	1212
p41377_v4	0.348944	0.0251912	2.19698	up	5.22166	5.36936	5.38941	6.46198	7.01905	5.90596	0	CCACTCCTTTCTCCAGCCTTTTACACTTGATGCTCTTGGATGAATAGAAAGGAGCACAAT	XR_242328.1	7	-	107383197	107384496	2	107383197,107383929,	107383848,107384496,	none					RefSeq	1218
p34650_v4	0.349241	0.0336866	2.40945	up	5.39934	5.38086	4.72849	6.40211	7.03251	5.88019	0	CCGGCCCTACTTTCTATCGAAGTAGAATAGAAGCACTGAGACCACAGAGGCAAGAGCTGG	ENST00000494214.2	19	+	37068129	37085610	4	37068129,37084747,37085057,37085302,	37068185,37084833,37085201,37085610,	ENSG00000233527.3	gene_id "ENSG00000233527.3"; transcript_id "ENST00000494214.2"; gene_type "antisense"; gene_status "NOVEL"; gene_name "AC092295.7"; transcript_type "antisense"; transcript_status "KNOWN"; transcript_name "AC092295.7-003"; level 2; tag "basic"; havana_gene "OTTHUMG00000048152.2"; havana_transcript "OTTHUMT00000109561.2";	ENST00000494214.2		Antisense	ENSEMBL	594
p26355	0.346721	0.00696563	3.34583	up	2.3771	2.48592	2.32944	4.42428	4.52921	3.46607	0	TTGCAGCGTGTAAAATAAAAGTTGTACCCTGAAGAGGTTACTTGACAGCTCCAGGGGTTA	uc003myy.1	6	+	10414299	10416190	3	10414299,10415519,10415781,	10415284,10415613,10416190,	LOC100130275	proteinID=;alignID=uc003myy.1;kgID=uc003myy.1;mRNA=AX747519;spID=;refseq=;protAcc=;description=Homo sapiens uncharacterized LOC100130275 (LOC100130275), non-coding RNA.;rfamAcc=;tRnaName=;	uc003myy.1		Intronic	UCSC	1488
p9329	0.346721	0.00523771	3.38435	up	6.11508	6.69784	5.96744	8.08447	8.37556	7.59697	0	GGATGGGACTTCAGCATCGATGAGTTGCCTTAGTAATACTGTTAATAAAAAGCACTAAAT	ENST00000602909.1	2	-	128601126	128603261	1	128601126,	128603261,	ENSG00000270081.1	gene_id "ENSG00000270081.1"; transcript_id "ENST00000602909.1"; gene_type "lincRNA"; gene_status "NOVEL"; gene_name "RP5-935K16.1"; transcript_type "lincRNA"; transcript_status "KNOWN"; transcript_name "RP5-935K16.1-001"; level 2; tag "basic"; havana_gene "OTTHUMG00000184130.1"; havana_transcript "OTTHUMT00000468074.1";	ENST00000602909.1		Intergenic	ENSEMBL	2135
p18402	0.348733	0.0217345	2.10703	up	4.81816	5.78377	5.42609	6.35861	6.30933	6.58571	0	AACTGAGTGAACTCCCACAATTTGAGCAACACCTCATTCTACATCCTAACCCAAAGTGTG	TCONS_00019182	11	+	356461	358128	2	356461,357465,	357141,358128,	XLOC_009017	Gene_id=XLOC_009017;Gene_name=linc-B4GALNT4-1;Transcript_id=TCONS_00019182;Transcript_name=linc-B4GALNT4-1;	XLOC_009017		Intergenic	HumanLincRNACatalog	1343
p4073	0.346721	0.017017	6.54026	up	3.63598	3.5866	4.3542	7.83587	6.1128	5.75615	0	GAGATGTTTTAAAGATGACAAAATATTGATGAAGATGGGCCAACAAGTGTTACTGTTACC	ENST00000568735.1	13	-	76178961	76210130	4	76178961,76192905,76196395,76209964,	76179081,76193042,76196439,76210130,	ENSG00000261105.1	gene_id "ENSG00000261105.1"; transcript_id "ENST00000568735.1"; gene_type "processed_transcript"; gene_status "NOVEL"; gene_name "RP11-173B14.5"; transcript_type "processed_transcript"; transcript_status "KNOWN"; transcript_name "RP11-173B14.5-002"; level 2; havana_gene "OTTHUMG00000172803.1"; havana_transcript "OTTHUMT00000420535.1";	ENST00000568735.1		Antisense	ENSEMBL	467
p41822_v4	0.35077	0.0387031	8.36403	up	5.22706	5.67614	6.02795	9.98404	9.36656	6.77314	0	ACAAGTCAGTGCCAAGGAGACTCAATAACAAAAACAACTAAACAATCCTTTCCTGCCTAA	XR_242648.1	9	+	97317350	97331038	3	97317350,97321250,97329671,	97317592,97321434,97331038,	none					RefSeq	1793
p4072	0.346721	0.00769781	7.71027	up	1.95892	1.8055	2.03101	5.89001	4.89991	3.84585	0	GTGGAAAACAGACAAACAATTGAATGCTTAGCTGTTTTTACAGGATAATGTGCTTTCAAC	ENST00000568302.1	13	-	76178835	76210130	3	76178835,76192905,76209964,	76179081,76193042,76210130,	ENSG00000261105.1	gene_id "ENSG00000261105.1"; transcript_id "ENST00000568302.1"; gene_type "processed_transcript"; gene_status "NOVEL"; gene_name "RP11-173B14.5"; transcript_type "processed_transcript"; transcript_status "KNOWN"; transcript_name "RP11-173B14.5-001"; level 2; tag "basic"; havana_gene "OTTHUMG00000172803.1"; havana_transcript "OTTHUMT00000420534.1";	ENST00000568302.1		Antisense	ENSEMBL	549
p25234	0.34911	0.0283367	2.07856	up	3.32361	2.8901	3.19638	4.56012	4.38938	3.62735	0	TTTTCTTCATGTGTCATGAAGTTTCCTCCTGATTTTCAGAGACCCTTCCAGGCCTGCAAG	NR_040535.1	22	+	39828164	39833133	4	39828164,39828821,39829233,39830129,	39828668,39828871,39829241,39833133,	LOC100506472	ID=rna42340;Name=NR_040535.1;Parent=gene34955;Dbxref=GeneID:100506472,Genbank:NR_040535.1;gbkey=misc_RNA;product=uncharacterized LOC100506472;transcript_id=NR_040535.1|ID=gene34955;Name=LOC100506472;Dbxref=GeneID:100506472;description=uncharacterized LOC100506472;gbkey=Gene;gene=LOC100506472	UCSC:uc021wpx.1		Antisense	RefSeq	3566
p25165	0.346721	0.00875507	2.49107	up	10.0324	9.55231	9.15956	11.1105	10.8413	10.7428	0	CCTGGCCTTTTGTAGACGTCTGACGATTAGTTTTTGAAATACTTTCCGTTTTCTGTAAAA	NR_037857.1	2	+	122407229	122486136	4	122407229,122408043,122463343,122485378,	122407957,122408258,122463483,122486136,	LOC254128	ID=rna6053;Name=NR_037857.1;Parent=gene4873;Dbxref=GeneID:254128,Genbank:NR_037857.1;gbkey=misc_RNA;product=uncharacterized LOC254128%2C transcript variant 3;transcript_id=NR_037857.1|ID=gene4873;Name=LOC254128;Dbxref=GeneID:254128;description=uncharacterized LOC254128;gbkey=Gene;gene=LOC254128	UCSC:uc002tnj.2		Antisense	RefSeq	1841
p8125	0.350581	0.0382277	2.37587	up	4.65992	5.37622	4.42727	6.61816	5.98	5.61062	0	TGACACTCTTTACATCAAATGACACACAATGAACATAATGAAGGCCTGTTGGCCCTGGGC	ENST00000590001.1	19	-	2329110	2355778	3	2329110,2331104,2355746,	2329667,2331108,2355778,	ENSG00000267331.1	gene_id "ENSG00000267331.1"; transcript_id "ENST00000590001.1"; gene_type "antisense"; gene_status "NOVEL"; gene_name "AC005258.3"; transcript_type "antisense"; transcript_status "KNOWN"; transcript_name "AC005258.3-001"; level 2; tag "basic"; havana_gene "OTTHUMG00000180443.1"; havana_transcript "OTTHUMT00000451388.1";	ENST00000590001.1		Antisense	ENSEMBL	593
p28356	0.348944	0.0274275	3.86102	up	3.00498	2.14551	1.68082	4.64193	4.65708	3.37925	0	GGTAAATGTTTAACTCTTAGATCATGTACATACTTAAATATGTATTTAAATACATGATGC	ASO3578	None	None	None	None	None	None	None	ASO3578	Accession=CR597957;Description=full-length cDNA clone CS0CAP008YD13 of Thymus of Homo sapiens (human).	asoverlaps_597_1475		Intronic	RNAdb	1475
p5256	0.348944	0.0262162	4.01608	up	5.83874	6.06052	5.17902	7.7487	8.57119	6.77575	0	TGCAGTCAGATTGCCAGTTTCACTTAGAGGTGGAAATGTCAACCCACTGGTTGGAATGGG	ENST00000567644.1	15	-	74208644	74218639	4	74208644,74212178,74217610,74218580,	74208788,74212379,74217846,74218639,	ENSG00000261801.1	gene_id "ENSG00000261801.1"; transcript_id "ENST00000567644.1"; gene_type "antisense"; gene_status "NOVEL"; gene_name "LOXL1-AS1"; transcript_type "antisense"; transcript_status "KNOWN"; transcript_name "LOXL1-AS1-010"; level 2; tag "basic"; havana_gene "OTTHUMG00000172711.2"; havana_transcript "OTTHUMT00000420128.1";	ENST00000567644.1	LOXL1-AS1	Antisense	ENSEMBL	640
p28379	0.348733	0.0213699	2.68663	up	7.08209	7.00776	7.28801	8.41291	9.26692	7.97543	0	AGCACAATCACGCTCGCCCAGAAACTTGTAGCTGAGATAGGATGGCACCTTGAGGACGCG	ASO2091	None	None	None	None	None	None	None	ASO2091	Accession=BC036881;Description=Homo sapiens, clone IMAGE:5242858, mRNA.	asoverlaps_436_1841		Antisense	RNAdb	1841
p15697	0.348944	0.0275119	2.60972	up	6.30773	4.99565	5.21832	6.97925	6.87758	6.81655	0	ATCATGTGGTCTACAGCACAAGGTTGCTAAAGCATCTTCTGCCAGAATTCTGTGAGTATC	ENST00000426023.1	8	-	54427730	54436491	2	54427730,54435888,	54429514,54436491,	ENSG00000237807.3	gene_id "ENSG00000237807.3"; transcript_id "ENST00000426023.1"; gene_type "lincRNA"; gene_status "NOVEL"; gene_name "RP11-400K9.4"; transcript_type "lincRNA"; transcript_status "KNOWN"; transcript_name "RP11-400K9.4-001"; level 2; tag "basic"; havana_gene "OTTHUMG00000164264.1"; havana_transcript "OTTHUMT00000377988.1";	uc003xrj.1;UCSC_3563_2387;TCONS_00014514;XLOC_007085		Intergenic	ENSEMBL	2387
p29049	0.349241	0.0339074	2.00544	up	4.7456	5.42267	5.62255	6.60719	6.15609	6.0393	0	CAGGAGCCCCTGAGATCATCTTAATTCAGAAATCTTCAAATGTTTCTACTAAATGAGATT	ENST00000542598.1	11	+	73116341	73121717	3	73116341,73117487,73121530,	73116429,73117546,73121717,	ENSG00000256448.1	gene_id "ENSG00000256448.1"; transcript_id "ENST00000542598.1"; gene_type "antisense"; gene_status "NOVEL"; gene_name "RP11-809N8.4"; transcript_type "antisense"; transcript_status "KNOWN"; transcript_name "RP11-809N8.4-002"; level 2; tag "basic"; havana_gene "OTTHUMG00000167996.1"; havana_transcript "OTTHUMT00000397428.1";	ENST00000542598.1		Antisense	ENSEMBL	334
p28930	0.351023	0.0401598	4.00505	up	4.68561	5.4593	4.90293	6.5078	8.26593	6.27957	0	ACACGAAAAACACGGATGGGATTTCGTTTTCACCTTAAAGCATTAAAGTGCTTTAACTGG	ENST00000452079.1	1	-	3652547	3663886	4	3652547,3659367,3659624,3662170,	3656951,3659475,3659754,3663886,	ENSG00000227372.5	gene_id "ENSG00000227372.5"; transcript_id "ENST00000452079.1"; gene_type "antisense"; gene_status "KNOWN"; gene_name "TP73-AS1"; transcript_type "antisense"; transcript_status "KNOWN"; transcript_name "TP73-AS1-003"; level 2; tag "basic"; havana_gene "OTTHUMG00000003414.2"; havana_transcript "OTTHUMT00000009558.1";	NR_033710;RefSeq_150_5945;NR_033711.1;RefSeq_119_6409	TP73-AS1	Antisense	ENSEMBL	6358
p37678_v4	0.354014	0.0476308	3.92262	up	2.49861	1.78382	2.21788	4.07414	5.32395	3.01768	0	GATAGGTCTACTGTAAAAAACCAAAGTCAACTTTGAATAAACTTGACAAGCTGAAGGAGA	ENST00000607844.1	5	-	49958692	49959100	1	49958692,	49959100,	ENSG00000271752.1	gene_id "ENSG00000271752.1"; transcript_id "ENST00000607844.1"; gene_type "lincRNA"; gene_status "NOVEL"; gene_name "RP11-269M20.3"; transcript_type "lincRNA"; transcript_status "KNOWN"; transcript_name "RP11-269M20.3-001"; level 2; tag "basic"; havana_gene "OTTHUMG00000185342.1"; havana_transcript "OTTHUMT00000470250.1";			Intergenic	ENSEMBL	408
p29069	0.32948	0.000493212	4.57402	up	2.89064	2.18743	2.65215	4.8519	4.77446	4.68423	0	CTGACTTAGAGAGCACAGTTATTCCATCCATATGGAAATAAACATTTTGGATTCCTGATC	ENST00000541775.1	12	+	7260903	7274447	12	7260903,7261268,7262659,7262893,7263620,7264602,7267725,7267981,7271494,7272095,7273101,7274307,	7261077,7261543,7262743,7263168,7264202,7264660,7267815,7271273,7271622,7272149,7273221,7274447,	ENSG00000205885.3	gene_id "ENSG00000205885.3"; transcript_id "ENST00000541775.1"; gene_type "antisense"; gene_status "NOVEL"; gene_name "C1RL-AS1"; transcript_type "antisense"; transcript_status "KNOWN"; transcript_name "C1RL-AS1-001"; level 2; tag "basic"; havana_gene "OTTHUMG00000168164.1"; havana_transcript "OTTHUMT00000398549.1";	NR_026947;RefSeq_207_5272	C1RL-AS1	Antisense	ENSEMBL	5272
p27392	0.350435	0.0351481	6.79389	up	2.25548	1.27859	1.86645	5.01219	5.73548	2.94555	0	CTCCTACTGTGATCCCACACTGAAAAATGTTGAGTTTTAGATTAATATGCATCTTGTAAG	uc.82-	2	-	156727098	156727308	1	156727098,	156727308,	uc.82-	uc.82-	uc.82-		Intergenic	UCR	210
p27498	0.348681	0.0205013	2.35898	up	4.4077	4.25328	4.22115	5.69208	6.00317	4.90136	0	CCCTCCTTCTCTGAGTTCAGCAACTAATTATATTTTTAAATAATGGCTACCATTGAACAC	uc.115-	3	-	19034157	19034376	1	19034157,	19034376,	uc.115-	uc.115-	uc.115-		Intergenic	UCR	219
p25163	0.349241	0.0334822	2.22115	up	2.71768	2.87897	2.5155	3.55923	4.54554	3.46132	0	GAGTGTTCTGAATAGAGACGCCTAAAACAAGAGCCAAAGACATAGCAATGGAGAACGTGG	XR_109927.1	2	+	102599926	102601567	3	102599926,102600153,102601045,	102600040,102600283,102601567,	LOC100506328	ID=rna5793;Name=XR_109927.1;Parent=gene4657;Dbxref=GeneID:100506328,Genbank:XR_109927.1;gbkey=misc_RNA;product=uncharacterized LOC100506328;transcript_id=XR_109927.1|ID=gene4657;Name=LOC100506328;Dbxref=GeneID:100506328;gbkey=Gene;gene=LOC100506328	XR_109927.1		Intergenic	RefSeq	766
p2877	0.346721	0.00154449	2.06742	up	6.21118	6.04779	5.96957	7.29964	7.16843	6.90396	0	AACAACATTAACTAGTTACTTTGCGTCATTGAAGGTTTGGATAATTAAGGGAGCACTAGA	ENST00000526795.1	11	+	82783123	82788215	4	82783123,82783664,82784344,82788075,	82783223,82783846,82784489,82788215,	ENSG00000246067.2	gene_id "ENSG00000246067.2"; transcript_id "ENST00000526795.1"; gene_type "lincRNA"; gene_status "NOVEL"; gene_name "RP11-113K21.5"; transcript_type "lincRNA"; transcript_status "KNOWN"; transcript_name "RP11-113K21.5-003"; level 2; havana_gene "OTTHUMG00000167010.1"; havana_transcript "OTTHUMT00000392428.1";	ENST00000526795		Intergenic	ENSEMBL	567
p16900	0.346721	0.00182894	2.44561	up	2.79498	3.09585	2.73993	4.25587	4.34621	3.89928	0	TGTTTGTCAGGGAAGATCCCTTGGGAAAGGCTGTACATCCTTTTGAAATCCCAGAGATCT	ENST00000588973.1	9	+	123606990	123613802	5	123606990,123607270,123609571,123612640,123613515,	123607177,123607474,123609631,123612935,123613802,	ENSG00000226752.2	gene_id "ENSG00000226752.2"; transcript_id "ENST00000588973.1"; gene_type "processed_transcript"; gene_status "NOVEL"; gene_name "RP11-27I1.2"; transcript_type "processed_transcript"; transcript_status "KNOWN"; transcript_name "RP11-27I1.2-010"; level 2; tag "RNA_Seq_supported_only"; havana_gene "OTTHUMG00000020572.2"; havana_transcript "OTTHUMT00000460645.1";	ENST00000588973.1		Intergenic	ENSEMBL	1033
p8336	0.352697	0.0437244	4.73233	up	4.44846	3.60991	2.40239	6.18782	6.25357	4.74702	0	CAAGTATTGGGGTAATAGCCAGTGTCTTAGTTGTTTAAACAGTTTAATGGAAATCAGTAC	ENST00000588040.1	19	-	38219486	38221544	2	38219486,38221383,	38220685,38221544,	ENSG00000267152.1	gene_id "ENSG00000267152.1"; transcript_id "ENST00000588040.1"; gene_type "lincRNA"; gene_status "NOVEL"; gene_name "CTD-2528L19.6"; transcript_type "lincRNA"; transcript_status "KNOWN"; transcript_name "CTD-2528L19.6-001"; level 2; tag "basic"; havana_gene "OTTHUMG00000182110.1"; havana_transcript "OTTHUMT00000459508.1";	ENST00000588040.1	CTD-2528L19.6	Intergenic	ENSEMBL	1360
p7006	0.353608	0.046254	2.23742	up	4.98566	5.13849	4.47124	6.0124	6.64674	5.42176	0	TAACTCACAACTTGGTGTCTCATAACTCACTTCTGAAATATCCAATAAAAAACTGCCAAG	ENST00000533232.1	17	-	70076078	70116934	4	70076078,70078061,70080046,70116903,	70077542,70078182,70080169,70116934,	ENSG00000234899.4	gene_id "ENSG00000234899.4"; transcript_id "ENST00000533232.1"; gene_type "processed_transcript"; gene_status "NOVEL"; gene_name "AC005152.2"; transcript_type "retained_intron"; transcript_status "KNOWN"; transcript_name "AC005152.2-012"; level 1; tag "exp_conf"; havana_gene "OTTHUMG00000132234.5"; havana_transcript "OTTHUMT00000389046.1";	ENST00000533232.1		Divergent	ENSEMBL	1739
p28729	0.350581	0.036926	2.28666	up	7.34126	7.97566	7.95254	9.07256	9.44461	8.33201	0	TCAACTGCCTATGATCATGATGAAAGGTTACTGCCTTCTTACAAAAATTATATTGGCATC	LIT1702	None	None	None	None	None	None	None	LIT1702	Accession=aHIF;Description=Homo sapiens hypoxia inducible factor (aHIF) antisense RNA sequence	CombinedLit_137_1194		Antisense	RNAdb	1194
p19966	0.346721	0.0067068	2.01017	up	3.51298	4.14268	3.67121	4.85421	4.68991	4.8047	0	CAGGGCATACCCTTCGGTGCCTGGATTCCTTTGATGAAAGGGCAAAGCCTTGAACCTAAG	TCONS_00024279	16	-	86366564	86372267	4	86366564,86367293,86370966,86371287,	86366650,86367513,86371167,86372267,	XLOC_012045	Gene_id=XLOC_012045;Gene_name=linc-COX4NB-6;Transcript_id=TCONS_00024279;Transcript_name=linc-COX4NB-6;	uc010von.1;UCSC_7185_1487;XLOC_012045		Intergenic	HumanLincRNACatalog	1487
p7966	0.354588	0.0485239	3.03269	up	3.7342	3.27042	3.20387	4.53734	6.0908	4.38214	0	CTTTGGAATCCTGGGACAGAAAGAAATTATGTAAATAGGAACAGCGGTTTATTGAAAGGA	ENST00000582239.1	18	+	30413429	30435253	4	30413429,30414818,30427400,30435134,	30413486,30415154,30427532,30435253,	ENSG00000263765.1	gene_id "ENSG00000263765.1"; transcript_id "ENST00000582239.1"; gene_type "antisense"; gene_status "NOVEL"; gene_name "RP11-746B8.1"; transcript_type "antisense"; transcript_status "KNOWN"; transcript_name "RP11-746B8.1-002"; level 2; tag "basic"; havana_gene "OTTHUMG00000179835.3"; havana_transcript "OTTHUMT00000448445.2";	ENST00000582239.1		Antisense	ENSEMBL	644
p43145_v4	0.35077	0.0390706	2.55152	up	6.49936	5.72744	5.18674	7.49237	7.26977	6.70548	0	TGAGTTTCATGGCCATCTCTAACTAAGGACAGGACATCGATGTCATCTGTAACTTCCGGT	XR_132604.3	16	-	3104779	3109364	3	3104779,3105736,3108996,	3105033,3105946,3109364,	none					RefSeq	832
RNA147326|p0430_imsncRNA839	0.346721	0.015434	2.04109	up	2.88479	2.93545	2.84688	3.71176	4.42104	3.62234	0	TCCTAGGAAATATCCCTTCCCATAGCACTTCAGAGTCTTTGCGGCAACTCTGCTGCAATG	RNA147326|p0430_imsncRNA839								nc080					PubMed ID:21789175	NA
p26795	0.346721	0.00579222	4.05694	up	3.03249	2.0245	2.98874	4.86309	4.90481	4.33899	0	CTTCTGGATTTCAAATGTTGCTGTGCTCACAGAAACCTGATGGTTTACACACCAAGCAAT	HIT000066927	22	-	44882180	44882794	1	44882180,	44882794,	HIX0041227	None	H-InvDB_521_623		Intergenic	H-InvDB	614
p21330	0.353608	0.0463896	3.11486	up	3.98578	3.64029	2.77752	5.14853	5.86328	4.30929	0	TGTTTAACTTGGATCAATTATCTCCTATTGCTCCCAGCTTCATGCCAGGTACTCTCCACT	TCONS_00004034	2	+	221495106	221498693	3	221495106,221497377,221498652,	221495281,221497528,221498693,	XLOC_001872	Gene_id=XLOC_001872;Gene_name=linc-CCDC140-7;Transcript_id=TCONS_00004034;Transcript_name=linc-CCDC140-7;	XLOC_001872		Intergenic	HumanLincRNACatalog	367
p26062	0.350581	0.038346	2.04784	up	6.70749	6.51765	6.64094	8.20432	7.7169	7.04717	0	TCCTTTGGCAACACATTAACTACACTCTGTGGCCATCCCTTGACTTCTGAGAGGATGTTT	uc002qrx.1	19	-	58769781	58790174	2	58769781,58789888,	58771057,58790174,	BC063675	proteinID=;alignID=uc002qrx.1;kgID=uc002qrx.1;mRNA=BC063675;spID=;refseq=;protAcc=;description=Homo sapiens cDNA FLJ32483 fis, clone SKNMC2001503, weakly similar to P-SELECTIN GLYCOPROTEIN LIGAND 1 PRECURSOR.;rfamAcc=;tRnaName=;	UCSC_6883_1562		Antisense	UCSC	1562
p37217_v4	0.346721	0.00170502	2.06659	up	3.5036	3.90239	3.59201	4.75752	4.80695	4.57529	0	GCCCTCTCCAAGGAGGCCGGCCCTGGATATTTCACCCAAAATATTTATTTTTTCTTTTTT	ENST00000604793.1	2	+	98280701	98287845	4	98280701,98282286,98287052,98287793,	98280935,98282383,98287152,98287845,	ENSG00000228486.5	gene_id "ENSG00000228486.5"; transcript_id "ENST00000604793.1"; gene_type "antisense"; gene_status "NOVEL"; gene_name "AC017099.3"; transcript_type "antisense"; transcript_status "KNOWN"; transcript_name "AC017099.3-029"; level 2; tag "basic"; havana_gene "OTTHUMG00000153062.6"; havana_transcript "OTTHUMT00000468429.1";			Antisense	ENSEMBL	483
p25555	0.350581	0.0360058	2.62018	up	3.66597	3.514	2.76466	5.06758	5.04149	4.00456	0	GATTCTGGGTTTGGAACTCTAGAATCAATGTTGAGGAAAAATAGAACTTGGCGATTTTAT	XR_132565.1	9	-	93968456	93972589	1	93968456,	93972589,	FP2234	ID=rna20325;Name=XR_132565.1;Parent=gene17363;Dbxref=GeneID:100507137,Genbank:XR_132565.1;gbkey=misc_RNA;product=uncharacterized LOC100507137;transcript_id=XR_132565.1|ID=gene17363;Name=FP2234;Dbxref=GeneID:100507137;gbkey=Gene;gene=FP2234	XR_132565.1		Intergenic	RefSeq	4133
p3147	0.346721	0.00809948	2.90017	up	6.34489	6.3472	5.92624	7.76012	8.22015	7.24648	0	CATGAACACCTCTTTAATCACAAGTCCTCAACTCCAAGGTTAGCTTTATTTCAACTTTTA	ENST00000553202.1	12	-	44112795	44117803	1	44112795,	44117803,	ENSG00000257742.1	gene_id "ENSG00000257742.1"; transcript_id "ENST00000553202.1"; gene_type "lincRNA"; gene_status "NOVEL"; gene_name "RP11-350F4.2"; transcript_type "lincRNA"; transcript_status "KNOWN"; transcript_name "RP11-350F4.2-001"; level 2; tag "basic"; havana_gene "OTTHUMG00000169422.1"; havana_transcript "OTTHUMT00000403930.1";	ENST00000553202.1		Intergenic	ENSEMBL	5008
p43289_v4	0.348733	0.0221978	2.67809	up	3.69502	4.3787	4.76756	5.88491	5.98459	5.2354	0	CTTCCTCCTCTCTTTAACACCAACTTACAACCAAAACGTCTACATCTGTTTTAAAAAGAT	NR_103774.1	16	+	88797587	88807833	3	88797587,88804228,88804911,	88797856,88804813,88807833,	none					RefSeq	3776
p29751	0.346721	0.0163649	2.51545	up	4.04226	3.15702	3.07082	4.87582	4.87977	4.50695	0	CCCTTCACCAAGATTCTTCTCTGATCCACAAATTCAATTACCAATTTATTTGTTCACTGC	TCONS_00026410	18	-	9318643	9334313	3	9318643,9322059,9334134,	9319179,9322150,9334313,	XLOC_012754	Gene_id=XLOC_012754;Gene_name=linc-LAMA1-5;Transcript_id=TCONS_00026410;Transcript_name=linc-LAMA1-5;	XLOC_012754		Divergent	HumanLincRNACatalog	806
p18325	0.351483	0.0424123	2.3469	up	3.93612	4.10687	4.02995	5.40871	5.886	4.47049	0	TTTCATGGTAACATCAAAAATCAGGATTCCTGGATCTGGAGCAGTTTATTCCCTCGGCCT	TCONS_00019670	11	-	65574366	65585604	2	65574366,65585460,	65574984,65585604,	XLOC_009475	Gene_id=XLOC_009475;Gene_name=linc-DKFZp761E198-1;Transcript_id=TCONS_00019670;Transcript_name=linc-DKFZp761E198-1;	XLOC_009475		Intergenic	HumanLincRNACatalog	762
p38241_v4	0.346721	0.0153638	2.08889	up	4.0876	4.7607	3.96209	5.45955	5.36545	5.17359	0	ATTTCTACACTCAGTGCTCGGGAACCAGTGGGCACTGAGAATGGTTTATGGCCTGACATT	ENST00000362567.2	9	-	139620556	139620686	1	139620556,	139620686,	ENSG00000233016.2	gene_id "ENSG00000233016.2"; transcript_id "ENST00000362567.2"; gene_type "antisense"; gene_status "KNOWN"; gene_name "SNHG7"; transcript_type "snoRNA"; transcript_status "KNOWN"; transcript_name "SNHG7-201"; level 3; tag "basic"; havana_gene "OTTHUMG00000020949.1";				ENSEMBL	130
p30173	0.348944	0.0233605	38.6494	up	3.34609	1.20372	1.24439	8.14794	8.82229	4.64109	0	CCCCTTGTCTATCTATCATGAGACTGTACACGTAAGAAGCAAAAAACTAGTAACATTTAA	NR_002160.1	Y	-	19687040	19691332	3	19687040,19688582,19691195,	19687247,19688700,19691332,	FAM224B	ID=rna44868;Name=NR_002160.1;Parent=gene37096;Dbxref=GeneID:401629,Genbank:NR_002160.1,HGNC:37737;gbkey=misc_RNA;product=family with sequence similarity 224%2C member B %28non-protein coding%29;transcript_id=NR_002160.1|ID=gene37096;Name=FAM224B;Dbxref=GeneID:401629,HGNC:37737;description=family with sequence similarity 224%2C member B %28non-protein coding%29;gbkey=Gene;gene=FAM224B;gene_synonym…	UCSC:uc004fto.3		Intergenic	RefSeq	462
p5259	0.35077	0.0387828	2.5518	up	6.35043	6.5699	6.2145	7.55698	8.55263	7.07977	0	AGCCTTCTTGTGTCCCTGTAGGAGGAGAAACACCTGGCAACTTAAATTTTTTAAAATAAC	ENST00000562965.1	15	-	74211380	74220301	2	74211380,74220117,	74212379,74220301,	ENSG00000261801.1	gene_id "ENSG00000261801.1"; transcript_id "ENST00000562965.1"; gene_type "antisense"; gene_status "NOVEL"; gene_name "LOXL1-AS1"; transcript_type "antisense"; transcript_status "KNOWN"; transcript_name "LOXL1-AS1-004"; level 2; tag "basic"; havana_gene "OTTHUMG00000172711.2"; havana_transcript "OTTHUMT00000420133.1";	ENST00000562965.1	LOXL1-AS1	Antisense	ENSEMBL	1183
p33425	0.350435	0.0346008	4.27491	up	3.41865	4.07285	4.08483	7.1194	5.78164	4.96296	0	GAATAGAACTTTCTCATTCATCTTTGAATAACGTCTCCTTGTTTACCCTGGTATTCTAGA	ENST00000559280.1	15	-	64658142	64665970	2	64658142,64665354,	64658274,64665970,	ENSG00000259316.1	gene_id "ENSG00000259316.1"; transcript_id "ENST00000559280.1"; gene_type "processed_transcript"; gene_status "NOVEL"; gene_name "CTD-2116N17.1"; transcript_type "retained_intron"; transcript_status "KNOWN"; transcript_name "CTD-2116N17.1-003"; level 2; havana_gene "OTTHUMG00000172470.1"; havana_transcript "OTTHUMT00000418696.1";	ENST00000559280.1	CTD-2116N17.1	Antisense	ENSEMBL	748
p11544	0.348944	0.0269211	2.44068	up	5.47201	4.36245	5.37858	6.52288	6.44155	6.11045	0	GATGGAAGAAAACCCAAATATACCAGAAATGGGTAGTACACCTCCATTGTCTATTTATAT	ENST00000463167.1	3	-	149366783	149367971	2	149366783,149367626,	149366889,149367971,	ENSG00000241985.1	gene_id "ENSG00000241985.1"; transcript_id "ENST00000463167.1"; gene_type "sense_intronic"; gene_status "NOVEL"; gene_name "WWTR1-IT1"; transcript_type "sense_intronic"; transcript_status "KNOWN"; transcript_name "WWTR1-IT1-001"; level 2; tag "dotter_confirmed"; tag "low_sequence_quality"; tag "basic"; havana_gene "OTTHUMG00000159620.1"; havana_transcript "OTTHUMT00000356532.1";	ENST00000463167.1	WWTR1-IT1	Sense	ENSEMBL	451
p25556	0.354729	0.0495274	4.85643	up	4.07121	3.20469	3.82979	6.02779	7.30336	4.61423	0	GCGTTTGTAATTCAGCATCTTAAAATGTCTCTTTTGGCAGTATTTCTTTACAAATGTGGC	NR_023390.1	9	-	98568369	98638259	3	98568369,98612508,98638146,	98576204,98612574,98638259,	LINC00476	ID=rna20437;Name=NR_023390.1;Parent=gene17447;Dbxref=GeneID:100128782,Genbank:NR_023390.1,HGNC:27858;gbkey=misc_RNA;product=long intergenic non-protein coding RNA 476%2C transcript variant 1;transcript_id=NR_023390.1|ID=gene17447;Name=LINC00476;Dbxref=GeneID:100128782,HGNC:27858;description=long intergenic non-protein coding RNA 476;gbkey=Gene;gene=LINC00476;gene_synonym=C9orf130,NAG11,NAG12	UCSC:uc004avp.4		Antisense	RefSeq	8014
p1363	0.346721	0.00195736	2.9045	up	4.20674	4.8347	4.21899	5.8602	6.02263	5.99248	0	GTTCAGACTCATGAAACCAATCTTCAGATGCTCTGTAAACCACATAATAAAGAGTTTGGA	ENST00000423222.1	1	+	211556144	211605878	6	211556144,211564957,211565168,211570108,211599552,211605660,	211556267,211565039,211565318,211570173,211599625,211605878,	ENSG00000153363.8	gene_id "ENSG00000153363.8"; transcript_id "ENST00000423222.1"; gene_type "processed_transcript"; gene_status "KNOWN"; gene_name "LINC00467"; transcript_type "processed_transcript"; transcript_status "KNOWN"; transcript_name "LINC00467-001"; level 2; tag "basic"; havana_gene "OTTHUMG00000036998.3"; havana_transcript "OTTHUMT00000089831.3";	NR_026761;RefSeq_3048_758	LINC00467	Intergenic	ENSEMBL	711
p17623	0.348733	0.0221712	3.32862	up	5.99198	6.61872	5.94651	7.69652	8.74456	7.32091	0	TCTTCAGAATAAGGATAATGAATTGGAAATACGACCATTTCTTTTCATTGCCCTTGATGG	TCONS_00001938	1	+	10516602	10520093	2	10516602,10519348,	10516989,10520093,	XLOC_000048	Gene_id=XLOC_000048;Gene_name=linc-PEX14-1;Transcript_id=TCONS_00001938;Transcript_name=linc-PEX14-1;	XLOC_000048		Divergent	HumanLincRNACatalog	1132
p17290	0.35077	0.039424	4.20321	up	3.65226	2.20058	1.50929	4.11015	4.42969	5.03676	0	CAGCAATAAGGTGCTTCACATCATGAAGGGATATTTTTCCATCATCTTGGGATTTCATTC	ENST00000455570.1	Y	-	6338813	6341671	3	6338813,6340853,6341535,	6338990,6341058,6341671,	ENSG00000185700.6	gene_id "ENSG00000185700.6"; transcript_id "ENST00000455570.1"; gene_type "lincRNA"; gene_status "KNOWN"; gene_name "TTTY8B"; transcript_type "lincRNA"; transcript_status "KNOWN"; transcript_name "TTTY8B-002"; level 2; havana_gene "OTTHUMG00000040982.1"; havana_transcript "OTTHUMT00000098353.1";	LIT2244;CombinedLit_320_540;TCONS_00017624;XLOC_008314;TCONS_00017583;XLOC_008314	TTTY8B	Intergenic	ENSEMBL	518
RNA95782|RNS_864_113	0.349241	0.0338176	2.14148	up	5.82688	6.12993	5.67725	7.09165	7.46403	6.37421	0	ATCTGCAGAGTCACGTGGCACTCTGGCCACTGCTGAAGAGCTGCTCTCCCTCGAAGGGCA	RNA95782|RNS_864_113													http://research.imb.uq.edu.au/rnadb/NoncodingRNASearchV2.zip	NA
p4578	0.353986	0.047555	4.94023	up	3.60282	2.47516	2.71768	5.55933	6.32607	3.824	0	TGTCTGAGAACTACCTGTAATTAAAAGTCATTGAGAAACAAGGAGAAAGAGAACCAGTTT	ENST00000557304.1	14	-	74164805	74167054	2	74164805,74166866,	74165310,74167054,	ENSG00000258660.1	gene_id "ENSG00000258660.1"; transcript_id "ENST00000557304.1"; gene_type "antisense"; gene_status "NOVEL"; gene_name "RP4-693M11.3"; transcript_type "antisense"; transcript_status "KNOWN"; transcript_name "RP4-693M11.3-001"; level 2; tag "basic"; havana_gene "OTTHUMG00000171670.1"; havana_transcript "OTTHUMT00000414681.1";	ENST00000557304.1		Antisense	ENSEMBL	693
p2944	0.350581	0.0372212	2.10773	up	3.92082	3.44141	4.43001	5.36745	4.98622	4.66564	0	CAAAGTCATGCCAGTTACACTTTCTCATGATGTCATATTACATTTAGGCTTTGGTCATTT	ENST00000399123.2	11	+	113688798	113693180	3	113688798,113691161,113693156,	113688929,113691164,113693180,	ENSG00000256452.1	gene_id "ENSG00000256452.1"; transcript_id "ENST00000399123.2"; gene_type "antisense"; gene_status "NOVEL"; gene_name "RP11-667M19.10"; transcript_type "antisense"; transcript_status "KNOWN"; transcript_name "RP11-667M19.10-001"; level 2; tag "dotter_confirmed"; tag "basic"; havana_gene "OTTHUMG00000168206.1"; havana_transcript "OTTHUMT00000398804.1";	ENST00000399123.2		Antisense	ENSEMBL	158
p35125_v4	0.346721	0.0129902	2.07586	up	9.50281	9.02233	8.89027	10.0812	10.512	9.98337	0	ACCCCGAGAACCGTCAGTTTGAGCCAGATGGAAGCTGAGCTGAACACATTACGATGGATG	ENST00000602414.1	4	+	119199863	119200978	3	119199863,119200543,119200778,	119200292,119200586,119200978,	ENSG00000269893.1	gene_id "ENSG00000269893.1"; transcript_id "ENST00000602414.1"; gene_type "lincRNA"; gene_status "KNOWN"; gene_name "SNHG8"; transcript_type "lincRNA"; transcript_status "KNOWN"; transcript_name "SNHG8-001"; level 2; tag "basic"; havana_gene "OTTHUMG00000183991.1"; havana_transcript "OTTHUMT00000467703.1";	ENST00000602414.1	SNHG8	Intergenic	ENSEMBL	672
p28453	0.346924	0.019548	2.29801	up	8.56758	8.83222	8.53211	9.99969	10.2752	9.25814	0	AACAGCACAAAAGAGATAATTTACCAAGAGACTTTCCCTCCTTTCAGAGGCAACCAAGCC	ASO1686	None	None	None	None	None	None	None	ASO1686	Accession=AJ001827;Description=Homo sapiens EST from sel cDNA 5D10, maps to Los Alamos contig C284, chromosome 16p12.2.	asoverlaps_971_434			RNAdb	434
p7660	0.346924	0.0189597	2.40237	up	3.37577	3.44295	3.53379	4.77681	5.25156	4.11752	0	CTACGGGACAACCAACGTTTTCATTTGTGAATATCAATTACTTGCCAACTAATTTCAACT	ENST00000581072.1	18	-	19405447	19411367	3	19405447,19410580,19411282,	19409413,19410755,19411367,	ENSG00000265142.1	gene_id "ENSG00000265142.1"; transcript_id "ENST00000581072.1"; gene_type "antisense"; gene_status "NOVEL"; gene_name "hsa-mir-133a-1"; transcript_type "antisense"; transcript_status "KNOWN"; transcript_name "hsa-mir-133a-1.1-001"; level 2; tag "basic"; havana_gene "OTTHUMG00000179284.1"; havana_transcript "OTTHUMT00000445571.1";	ENST00000581072.1	hsa-mir-133a-1	Antisense	ENSEMBL	4226
p2603	0.353041	0.0444513	2.57541	up	3.99812	3.15223	3.81027	5.28896	5.52775	4.23831	0	GGATGAATAATGCCTAGAAAAGATACCGAATGTCTATGCCAGCTCTGGAGAGACCAAGAC	ENST00000527799.1	11	+	665909	678391	3	665909,673997,678322,	666490,674259,678391,	ENSG00000255158.1	gene_id "ENSG00000255158.1"; transcript_id "ENST00000527799.1"; gene_type "antisense"; gene_status "NOVEL"; gene_name "RP11-754B17.1"; transcript_type "antisense"; transcript_status "KNOWN"; transcript_name "RP11-754B17.1-001"; level 1; tag "basic"; tag "exp_conf"; havana_gene "OTTHUMG00000165430.1"; havana_transcript "OTTHUMT00000384005.1";	ENST00000527799.1		Antisense	ENSEMBL	912
p2625	0.348944	0.0243898	3.06551	up	5.00015	5.2736	4.75074	7.03292	7.08162	5.75832	0	GTGTGGGCAATGGACTGGCCATTTCCACAGTTTTGGAAACTTTTAAAAATCCATATTCTT	ENST00000507938.1	11	+	3837981	3843130	2	3837981,3841685,	3839379,3843130,	ENSG00000250404.1	gene_id "ENSG00000250404.1"; transcript_id "ENST00000507938.1"; gene_type "processed_transcript"; gene_status "NOVEL"; gene_name "AC090587.2"; transcript_type "processed_transcript"; transcript_status "KNOWN"; transcript_name "AC090587.2-001"; level 2; tag "dotter_confirmed"; tag "basic"; havana_gene "OTTHUMG00000012239.1"; havana_transcript "OTTHUMT00000034011.1";	ENST00000507938.1		Intronic	ENSEMBL	2843
p10726	0.349241	0.0337443	3.32729	up	4.26765	3.21126	4.15932	5.85402	6.21124	4.77601	0	TACCACCAACTGGTGGGAATACATGCAACACATGCATAAAACAGAGCATCAGTGGTGAAA	ENST00000421051.1	21	-	34484004	34496009	3	34484004,34486691,34495917,	34485035,34486929,34496009,	ENSG00000226527.1	gene_id "ENSG00000226527.1"; transcript_id "ENST00000421051.1"; gene_type "lincRNA"; gene_status "NOVEL"; gene_name "AP000289.6"; transcript_type "lincRNA"; transcript_status "KNOWN"; transcript_name "AP000289.6-001"; level 1; tag "basic"; tag "exp_conf"; havana_gene "OTTHUMG00000065062.1"; havana_transcript "OTTHUMT00000139728.1";	ENCODE_436_1361	AP000289.6	Intergenic	ENSEMBL	1361
p13906	0.351385	0.0416244	2.40847	up	3.70876	3.1201	4.55318	5.26306	4.9159	5.00743	0	AGTGACTGCAAACCAGATCTGTAGGCCTCATGCCTCAAATAATGAAAATTGTGATTTTTT	ENST00000511165.1	5	+	135802365	135844717	3	135802365,135840288,135844344,	135802574,135840382,135844717,	ENSG00000249803.1	gene_id "ENSG00000249803.1"; transcript_id "ENST00000511165.1"; gene_type "lincRNA"; gene_status "NOVEL"; gene_name "RP11-114H21.2"; transcript_type "lincRNA"; transcript_status "KNOWN"; transcript_name "RP11-114H21.2-002"; level 1; tag "basic"; tag "exp_conf"; havana_gene "OTTHUMG00000163214.1"; havana_transcript "OTTHUMT00000372127.1";	TCONS_00009522;XLOC_004568;TCONS_00009523;XLOC_004568		Intergenic	ENSEMBL	676
p13526	0.346721	0.0173334	2.2637	up	7.71079	8.25322	8.71641	9.38979	9.27724	9.54944	0	GCCACCTCTATATACATGTACACAAAGCCACACAGTTTACACAGTCACAGGTATTTAAGT	ENST00000518902.1	5	-	173146248	173173214	2	173146248,173173022,	173146546,173173214,	ENSG00000253686.1	gene_id "ENSG00000253686.1"; transcript_id "ENST00000518902.1"; gene_type "lincRNA"; gene_status "NOVEL"; gene_name "CTB-43E15.3"; transcript_type "lincRNA"; transcript_status "KNOWN"; transcript_name "CTB-43E15.3-003"; level 1; tag "exp_conf"; havana_gene "OTTHUMG00000163343.1"; havana_transcript "OTTHUMT00000372791.1";	ENST00000518902.1	CTB-43E15.3	Intergenic	ENSEMBL	490
p26461	0.328765	0.000170792	2.06197	up	9.49062	9.51342	9.71196	10.6462	10.6485	10.5534	0	TTGTGTTTCTCTTCACAGAATTTCTTCAGGTTGAATTACCTAGAAGTTTGTCACTGACTT	uc003yiz.2	8	-	100890377	100893849	1	100890377,	100893849,	DL491896	proteinID=;alignID=uc003yiz.2;kgID=uc003yiz.2;mRNA=DL491896;spID=;refseq=;protAcc=;description=Homo sapiens cDNA FLJ41478 fis, clone BRTHA2002376.;rfamAcc=;tRnaName=;	uc003yiz.2		Antisense	UCSC	3472
p39239_v4	0.34911	0.0329335	3.91844	up	2.92167	3.25605	3.95045	5.59445	6.12588	4.31869	0	GCTCTGGTTGGGACCCAGCAATTATTTTCCATAGCGAAGTGTTAATAAAATATCTGTTAC	XR_241208.1	1	-	15732242	15737542	3	15732242,15734332,15737486,	15732344,15734403,15737542,	none					RefSeq	229
p11684	0.350435	0.0351432	3.14002	up	2.25006	2.81781	2.92827	3.61885	5.24507	4.08454	0	TGATTCATATTCTTCTACTTGACCCTGACTGTCAGGACCAACAACACCAAATAACACCAA	ENST00000415869.1	3	-	193920804	193967942	3	193920804,193922607,193967844,	193921468,193922755,193967942,	ENSG00000225742.1	gene_id "ENSG00000225742.1"; transcript_id "ENST00000415869.1"; gene_type "lincRNA"; gene_status "NOVEL"; gene_name "RP11-513G11.4"; transcript_type "lincRNA"; transcript_status "KNOWN"; transcript_name "RP11-513G11.4-001"; level 2; tag "basic"; havana_gene "OTTHUMG00000155985.1"; havana_transcript "OTTHUMT00000342634.1";	TCONS_00005921;XLOC_003384;TCONS_00005922;XLOC_003384		Intergenic	ENSEMBL	910
p5833	0.35359	0.0451138	2.53193	up	2.62995	4.23501	3.29322	4.71137	4.73409	4.73343	0	TTAGACAAGTCTATTTTCAGACTCGCTCCTTTCTCTACCAAACCTGAGCTGCTTCCGATT	ENST00000570515.1	16	-	3053431	3055102	2	3053431,3054861,	3053798,3055102,	ENSG00000262362.1	gene_id "ENSG00000262362.1"; transcript_id "ENST00000570515.1"; gene_type "sense_overlapping"; gene_status "NOVEL"; gene_name "LA16c-380H5.2"; transcript_type "sense_overlapping"; transcript_status "KNOWN"; transcript_name "LA16c-380H5.2-001"; level 2; tag "basic"; havana_gene "OTTHUMG00000177449.1"; havana_transcript "OTTHUMT00000436960.1";	ENST00000570515.1	LA16c-380H5.2	Sense	ENSEMBL	608
p5178	0.348944	0.024245	2.98492	up	5.81643	6.02889	5.33824	7.03386	6.79409	8.08868	0	GTAGCCATCTTCCAAATACAAGTCTAGCCGGGTTAAAATAAAGAAGACATCAAGAAAACA	ENST00000560587.1	15	-	57208923	57210691	2	57208923,57209737,	57209410,57210691,	ENSG00000259484.1	gene_id "ENSG00000259484.1"; transcript_id "ENST00000560587.1"; gene_type "processed_transcript"; gene_status "NOVEL"; gene_name "RP11-323F24.1"; transcript_type "processed_transcript"; transcript_status "PUTATIVE"; transcript_name "RP11-323F24.1-002"; level 2; havana_gene "OTTHUMG00000172613.1"; havana_transcript "OTTHUMT00000419454.1";	ENST00000560587.1		Divergent	ENSEMBL	1441
p6865	0.348733	0.0220142	3.38578	up	4.5352	5.0616	3.98296	6.65662	6.65581	5.54579	0	CGCGGATCTTTTGCAAACATCTTTATTAATCTCATATAAAAATAAGGTCCATGGACGGTC	ENST00000589518.1	17	-	43324633	43325210	2	43324633,43325067,	43324883,43325210,	ENSG00000233483.2	gene_id "ENSG00000233483.2"; transcript_id "ENST00000589518.1"; gene_type "antisense"; gene_status "NOVEL"; gene_name "CTD-2020K17.4"; transcript_type "antisense"; transcript_status "KNOWN"; transcript_name "CTD-2020K17.4-004"; level 2; tag "basic"; havana_gene "OTTHUMG00000180198.2"; havana_transcript "OTTHUMT00000450933.1";	ENST00000589518.1	CTD-2020K17.4	Antisense	ENSEMBL	393
p25635	0.34911	0.0331717	10.1477	up	4.13365	2.22151	2.90357	6.49805	7.92771	4.86222	0	GTTAGAGGTGAAACCAGATGTTATGAGAGTACTTTAGTAGGCAAAATCGCATACTATAAA	NR_028084.1	Y	-	20551155	20566932	10	20551155,20551964,20552398,20552879,20553363,20553566,20554330,20554671,20566129,20566774,	20551882,20552186,20552586,20553089,20553457,20553737,20554424,20554800,20566179,20566932,	FAM41AY2	ID=rna44874;Name=NR_028084.1;Parent=gene37127;Dbxref=GeneID:100302526,Genbank:NR_028084.1,HGNC:37135;gbkey=misc_RNA;product=family with sequence similarity 41%2C member A%2C Y-linked 2;transcript_id=NR_028084.1|ID=gene37127;Name=FAM41AY2;Dbxref=GeneID:100302526,HGNC:37135;description=family with sequence similarity 41%2C member A%2C Y-linked 2;gbkey=Gene;gene=FAM41AY2	UCSC:uc011nau.2;uc011nat.2		Intergenic	RefSeq	2043
p25676	0.348944	0.0275742	2.66964	up	2.17007	3.14994	3.28959	4.38204	4.62009	3.8574	0	ACTCCTAAACACCCCAGAAAGGGAAGAGATTTAAGAGGAACCTTGATTCCTGCCATTCTG	uc010nzo.2	1	+	3816967	3832011	2	3816967,3830958,	3817195,3832011,	LOC100133612	proteinID=;alignID=uc010nzo.2;kgID=uc010nzo.2;mRNA=AK130173;spID=;refseq=;protAcc=;description=Homo sapiens uncharacterized LOC100133612 (LOC100133612), non-coding RNA.;rfamAcc=;tRnaName=;	uc010nzo.2		Divergent	UCSC	1281
p36719_v4	0.34911	0.031064	2.12016	up	6.52993	6.93058	6.7678	8.06035	8.21047	7.21001	0	CAAGAGCAGCGGAAAATGATCCAGTCACAGGACCTAAGTGTGAAACAGGCTACCTCATCA	TCONS_00030029	HSCHRUN_RANDOM_CTG15	+	150071	164052	3	150071,160378,163153,	150316,160555,164052,	XLOC_014510	Gene_id=XLOC_014510;Gene_name=linc-AKR1E2-1;Transcript_id=TCONS_00030029;Transcript_name=linc-AKR1E2-1;	TCONS_00030029		Intergenic	HumanLincRNACatalog	1321
p4907	0.350581	0.03829	5.05612	up	4.77686	3.77239	3.89149	7.2545	7.11292	5.08741	0	GAATTTGTAATTTGGTCTTAATTAAACTGCAGACTACCCAAAGGCCTTGATCAGTGGCCT	ENST00000557195.1	14	+	86401053	86594530	5	86401053,86467204,86497479,86537206,86594293,	86401205,86467297,86497574,86537311,86594530,	ENSG00000258733.1	gene_id "ENSG00000258733.1"; transcript_id "ENST00000557195.1"; gene_type "lincRNA"; gene_status "NOVEL"; gene_name "CTD-2341M24.1"; transcript_type "lincRNA"; transcript_status "KNOWN"; transcript_name "CTD-2341M24.1-001"; level 2; havana_gene "OTTHUMG00000171373.1"; havana_transcript "OTTHUMT00000413201.1";	ENST00000557195.1	CTD-2341M24.1	Intergenic	ENSEMBL	682
p34638_v4	0.349965	0.0342286	2.04902	up	8.26011	8.38288	7.50747	8.83845	8.98081	9.43601	0	AGAGTGAGGAGACCATAGCTGCACAGCCAGAGATGGGGTTCCATCATGTTTTCCAGGCTG	ENST00000597683.1	19	+	24216250	24249490	7	24216250,24228985,24231738,24232206,24246617,24247348,24248264,	24216423,24229081,24231816,24232350,24246743,24247471,24249490,	ENSG00000268362.1	gene_id "ENSG00000268362.1"; transcript_id "ENST00000597683.1"; gene_type "lincRNA"; gene_status "NOVEL"; gene_name "CTD-2017D11.1"; transcript_type "lincRNA"; transcript_status "KNOWN"; transcript_name "CTD-2017D11.1-002"; level 2; tag "basic"; havana_gene "OTTHUMG00000183392.1"; havana_transcript "OTTHUMT00000466449.1";	uc002nrr.1;UCSC_5083_1970	CTD-2017D11.1	Intergenic	ENSEMBL	1966
p33996_v4	0.348733	0.0221162	2.2659	up	9.98218	9.67078	9.69029	11.024	11.462	10.3975	0	CAAGCAAGCATGCAGCTTACTGCTTGAAAGGGTCTTGCCTCACCCAAGCTAGAGTGCAGT	ENST00000430245.1	1	-	173833038	173838020	13	173833038,173833394,173833621,173833812,173834366,173834647,173834994,173835314,173835665,173835898,173836128,173837118,173837891,	173833213,173833442,173833644,173833842,173834420,173834685,173835032,173835344,173835705,173835934,173836181,173837147,173838020,	ENSG00000234741.2	gene_id "ENSG00000234741.2"; transcript_id "ENST00000430245.1"; gene_type "processed_transcript"; gene_status "KNOWN"; gene_name "GAS5"; transcript_type "lincRNA"; transcript_status "KNOWN"; transcript_name "GAS5-027"; level 2; havana_gene "OTTHUMG00000037216.2"; havana_transcript "OTTHUMT00000090603.1";	ENST00000430245.1	GAS5	Intergenic	ENSEMBL	723
p10495	0.346721	0.00638792	2.18686	up	3.07224	2.86927	3.35648	4.55407	4.08201	4.04851	0	CAAGTGAATGAATGAATGACTCGATCAATCAACTGATCCATGAATCCATGGACCCCTGAA	ENST00000412495.1	20	-	61141549	61148733	7	61141549,61142426,61142912,61144754,61145033,61145518,61148632,	61141970,61142574,61144065,61144909,61145207,61145668,61148733,	ENSG00000174403.11	gene_id "ENSG00000174403.11"; transcript_id "ENST00000412495.1"; gene_type "antisense"; gene_status "KNOWN"; gene_name "C20orf166-AS1"; transcript_type "antisense"; transcript_status "KNOWN"; transcript_name "C20orf166-AS1-001"; level 2; tag "basic"; havana_gene "OTTHUMG00000048002.2"; havana_transcript "OTTHUMT00000109265.2";	NR_033263;RefSeq_1251_2449	C20orf166-AS1	Antisense	ENSEMBL	2302
RNA33775|snoRNA_scaRNA_371_66	0.350435	0.0347721	2.53849	up	2.42398	3.14013	3.27221	4.92944	4.15178	3.787	0	GATGACTGATCATTTCTTCACTTTGACCAGATGTCTACTGAAGAAAGCCTGCGTCTGAGG	RNA33775|snoRNA_scaRNA_371_66													ftp://ftp.ensembl.org/pub/current/fasta/homo_sapiens/ncrna/Homo_sapiens.GRCh37.61.ncrna.fa.gz	NA
p710	0.346721	0.00382401	3.46716	up	5.33038	5.51367	5.44643	7.51751	7.51605	6.63817	0	CTTCTTCATATTTAGTACTTTTACAATTTTAACAGTAAAATTAGTTTCATGTTTTATAGC	ENST00000400946.2	1	-	238643683	238649323	2	238643683,238649084,	238644981,238649323,	ENSG00000215808.2	gene_id "ENSG00000215808.2"; transcript_id "ENST00000400946.2"; gene_type "processed_transcript"; gene_status "NOVEL"; gene_name "RP11-371I1.2"; transcript_type "processed_transcript"; transcript_status "KNOWN"; transcript_name "RP11-371I1.2-001"; level 2; tag "basic"; havana_gene "OTTHUMG00000039532.1"; havana_transcript "OTTHUMT00000095377.1";	ENCODE_393_1537;TCONS_00000027;XLOC_001272		Intergenic	ENSEMBL	1537
p3681	0.350269	0.03437	8.57954	up	5.75133	6.73338	5.77425	10.2395	9.98565	7.33648	0	CCGCTGCTCTGCATCAGCAATGGCCGTTTGCAAGCTGGAACACTGTAAGGACAGGAGGAA	ENST00000548135.1	12	+	52801363	52822278	3	52801363,52806143,52821940,	52801445,52806352,52822278,	ENSG00000257500.1	gene_id "ENSG00000257500.1"; transcript_id "ENST00000548135.1"; gene_type "antisense"; gene_status "NOVEL"; gene_name "RP11-1020M18.10"; transcript_type "antisense"; transcript_status "KNOWN"; transcript_name "RP11-1020M18.10-001"; level 2; tag "basic"; havana_gene "OTTHUMG00000169769.1"; havana_transcript "OTTHUMT00000405793.1";	ENST00000548135.1		Antisense	ENSEMBL	629
p16548	0.348944	0.0281068	2.35966	up	3.41832	3.81954	4.1907	5.20959	5.45423	4.48048	0	TTTCAATAGTCCAGACAGCTTCCAACCAAAGATGTGGAGGCACAATCTTTGCCTGGTAGA	ENST00000433644.1	9	-	98177780	98189078	2	98177780,98189005,	98178446,98189078,	ENSG00000237857.1	gene_id "ENSG00000237857.1"; transcript_id "ENST00000433644.1"; gene_type "lincRNA"; gene_status "NOVEL"; gene_name "RP11-435O5.2"; transcript_type "lincRNA"; transcript_status "KNOWN"; transcript_name "RP11-435O5.2-001"; level 1; tag "basic"; tag "exp_conf"; havana_gene "OTTHUMG00000020281.1"; havana_transcript "OTTHUMT00000053234.1";	ENCODE_961_739		Intergenic	ENSEMBL	739
p6083	0.351166	0.0413757	2.40074	up	9.54561	10.1466	9.92416	11.3402	11.6824	10.3842	0	GAGGCTGTGGAGTACCTGGAGAAGGAGGAGAGACGCGAGAGGTCCACGAGGGAGCCCCAT	ENST00000562172.1	16	-	68679282	68680071	2	68679282,68679882,	68679643,68680071,	ENSG00000260577.1	gene_id "ENSG00000260577.1"; transcript_id "ENST00000562172.1"; gene_type "antisense"; gene_status "NOVEL"; gene_name "RP11-615I2.2"; transcript_type "antisense"; transcript_status "KNOWN"; transcript_name "RP11-615I2.2-001"; level 2; tag "basic"; havana_gene "OTTHUMG00000176785.1"; havana_transcript "OTTHUMT00000433757.1";	ENST00000562172.1		Antisense	ENSEMBL	550
p2855	0.32948	0.000452907	3.39514	up	7.36099	7.65714	7.69672	9.29966	9.57385	9.13175	0	TAGGGCCTTTTATTCACATATATGCTGCCTTCTCCACCAACTGATGTGATATCCTTTTAT	ENST00000566747.1	11	+	76511407	76515599	1	76511407,	76515599,	ENSG00000261578.1	gene_id "ENSG00000261578.1"; transcript_id "ENST00000566747.1"; gene_type "sense_overlapping"; gene_status "NOVEL"; gene_name "RP11-21L23.2"; transcript_type "sense_overlapping"; transcript_status "KNOWN"; transcript_name "RP11-21L23.2-001"; level 2; tag "basic"; havana_gene "OTTHUMG00000165240.1"; havana_transcript "OTTHUMT00000382875.1";	ENST00000566747.1		Sense	ENSEMBL	4192
p38220_v4	0.348733	0.0219403	2.04249	up	5.69323	5.89698	6.03483	7.03104	7.28838	6.39661	0	CAAATGTGTAAGCATCATGAGGTGTTTAAGCTGAGCTTTTAAATTAAAATTCTGCTGGGT	ENST00000608093.1	9	-	131068268	131068629	1	131068268,	131068629,	ENSG00000273281.1	gene_id "ENSG00000273281.1"; transcript_id "ENST00000608093.1"; gene_type "lincRNA"; gene_status "NOVEL"; gene_name "RP11-339B21.14"; transcript_type "lincRNA"; transcript_status "KNOWN"; transcript_name "RP11-339B21.14-001"; level 2; tag "basic"; havana_gene "OTTHUMG00000185894.1"; havana_transcript "OTTHUMT00000471657.1";			Intergenic	ENSEMBL	361
p33811	0.348944	0.0280172	2.1356	up	7.8644	8.39105	8.23981	9.25081	9.75687	8.77149	0	CTCTGTGACATTTTAAATGCGTGACAGAAGTGAGCAAATAAAGTGAGGAAGAAATCTATA	uc021wpo.1	22	-	38615297	38620110	1	38615297,	38620110,	DKFZp686N1150	proteinID=;alignID=uc021wpo.1;kgID=uc021wpo.1;mRNA=CR627445;spID=;refseq=;protAcc=;description=Homo sapiens cDNA FLJ37790 fis, clone BRHIP3000111.;rfamAcc=;tRnaName=;	uc021wpo.1		Antisense	UCSC	4813
p10449	0.350581	0.036338	3.3234	up	1.82342	3.05085	2.68427	4.88552	4.42677	3.44423	0	CCCCCTTTTTCCTTCTTTCTTTCATCTCTTCAATGAGATAGTGTGAAAGTAGTTTGTAAA	ENST00000438702.1	20	-	42976191	42983825	4	42976191,42979259,42980507,42983658,	42976458,42979496,42980590,42983825,	ENSG00000226812.1	gene_id "ENSG00000226812.1"; transcript_id "ENST00000438702.1"; gene_type "antisense"; gene_status "NOVEL"; gene_name "RP5-881L22.5"; transcript_type "antisense"; transcript_status "KNOWN"; transcript_name "RP5-881L22.5-001"; level 2; tag "basic"; havana_gene "OTTHUMG00000032526.1"; havana_transcript "OTTHUMT00000079346.1";	ENST00000438702.1		Antisense	ENSEMBL	754
p10600	0.34911	0.0318752	2.21412	up	9.38433	9.17384	8.89159	10.143	10.9199	9.82713	0	TGTTGATCTTGGCTTGATTCAGTCTGCCTTGTAACAGAAACTGGCGATGGAATATGAGAG	ENST00000428008.1	20	+	47895178	47905797	5	47895178,47895640,47897021,47897439,47905581,	47895275,47895745,47897107,47897501,47905797,	ENSG00000177410.8	gene_id "ENSG00000177410.8"; transcript_id "ENST00000428008.1"; gene_type "antisense"; gene_status "KNOWN"; gene_name "ZFAS1"; transcript_type "antisense"; transcript_status "KNOWN"; transcript_name "ZFAS1-006"; level 2; tag "basic"; havana_gene "OTTHUMG00000032698.3"; havana_transcript "OTTHUMT00000127851.1";	ENST00000428008.1	ZFAS1	Antisense	ENSEMBL	566
p33658	0.346924	0.019035	2.9029	up	4.36508	4.44152	3.89034	6.21118	6.05386	5.04439	0	CCACCCCTTCGGGTGTGAGCGCTCAATAAAAACAACACACTATAAAGTGTTTTTAAATCC	NR_033191.1	10	+	133747956	133770054	8	133747956,133748397,133753534,133754085,133757598,133758798,133761033,133769187,	133748059,133748510,133753700,133754198,133757649,133758963,133761295,133770054,	PPP2R2D	ID=rna23148;Name=NR_033191.1;Parent=gene19476;Dbxref=GeneID:55844,Genbank:NR_033191.1,HGNC:23732,HPRD:15172,MIM:613992;exception=annotated by transcript or proteomic data;gbkey=misc_RNA;product=protein phosphatase 2%2C regulatory subunit B%2C delta%2C transcript variant 2;transcript_id=NR_033191.1|ID=gene19476;Name=PPP2R2D;Dbxref=GeneID:55844,HGNC:23732,HPRD:15172,MIM:613992;description=protein p…	RefSeq_1901_1836		Antisense	RefSeq	1840
p38192_v4	0.346721	0.0152956	2.15375	up	5.89905	5.71111	6.0026	7.42378	6.98167	6.52787	0	GAGAGGAAGAAGTTACATTGTCGTATGAGGGATGCATTTTAACCATTAATTTGTGGTACA	ENST00000452148.2	9	+	97317350	97330409	3	97317350,97321250,97329671,	97317592,97321434,97330409,	ENSG00000231806.2	gene_id "ENSG00000231806.2"; transcript_id "ENST00000452148.2"; gene_type "antisense"; gene_status "NOVEL"; gene_name "PCAT7"; transcript_type "retained_intron"; transcript_status "KNOWN"; transcript_name "PCAT7-001"; level 2; tag "basic"; havana_gene "OTTHUMG00000020270.2"; havana_transcript "OTTHUMT00000053190.2";				ENSEMBL	1164
p14533	0.350415	0.0345454	2.24034	up	6.59678	6.18572	6.59796	7.78171	8.12334	6.96658	0	GGTATAGCCATCCTTATCATCAAACCCTCTTTTCTGGTATTCTCTCAATCCAGTCTTTCA	ENST00000422366.1	6	+	33217360	33219716	4	33217360,33217566,33218385,33219289,	33217432,33217666,33218488,33219716,	ENSG00000232940.1	gene_id "ENSG00000232940.1"; transcript_id "ENST00000422366.1"; gene_type "antisense"; gene_status "KNOWN"; gene_name "HCG25"; transcript_type "antisense"; transcript_status "KNOWN"; transcript_name "HCG25-003"; level 1; tag "basic"; tag "exp_conf"; havana_gene "OTTHUMG00000031170.3"; havana_transcript "OTTHUMT00000276267.1";	ENST00000422366.1	HCG25	Antisense	ENSEMBL	702
p4941	0.346721	0.00214481	3.3984	up	2.39789	2.63256	2.44233	3.78545	4.57487	4.40703	0	TCCGAGGAAGGATTTGCCTCAGGCCTGGTTCTGAGAAGTAAACAGGGTAATGTTCTGAAG	ENST00000553639.1	14	+	93533796	93538497	1	93533796,	93538497,	ENSG00000258730.1	gene_id "ENSG00000258730.1"; transcript_id "ENST00000553639.1"; gene_type "antisense"; gene_status "KNOWN"; gene_name "ITPK1-AS1"; transcript_type "antisense"; transcript_status "KNOWN"; transcript_name "ITPK1-AS1-001"; level 2; tag "basic"; havana_gene "OTTHUMG00000171263.1"; havana_transcript "OTTHUMT00000412683.1";	NR_002808;RefSeq_289_4682	ITPK1-AS1	Antisense	ENSEMBL	4701
p14677	0.352682	0.0435482	3.76696	up	4.21907	3.61101	3.52332	6.20651	6.42169	4.46541	0	GACAACCACTGAAATATGCTGCATCTTAGTCCAGGGATTTTTAAAGTGTGGTTCCTGGAA	ENST00000436876.2	6	+	114291269	114316808	4	114291269,114313056,114314506,114316763,	114291442,114313284,114314651,114316808,	ENSG00000228624.2	gene_id "ENSG00000228624.2"; transcript_id "ENST00000436876.2"; gene_type "processed_transcript"; gene_status "NOVEL"; gene_name "RP3-399L15.3"; transcript_type "processed_transcript"; transcript_status "KNOWN"; transcript_name "RP3-399L15.3-014"; level 2; havana_gene "OTTHUMG00000164691.2"; havana_transcript "OTTHUMT00000379843.1";	ENST00000436876.2		Antisense	ENSEMBL	591
p27840	0.348944	0.0276776	2.27889	up	8.15932	7.88617	7.51542	8.94486	9.59883	8.58221	0	AAGTTGGAATTTAAAAGTAAGAAAAAACTAAACAAACTGCGCAATTATAAAATCAGCACC	uc.480-	X	-	123235271	123235473	1	123235271,	123235473,	uc.480-	uc.480-	uc.480-		Antisense	UCR	202
p19931	0.346924	0.0195394	2.64287	up	3.81954	2.73048	2.9737	4.83136	4.64603	4.25266	0	GTATGTGCAGTATAAACAAGTTACACACATATCGCATAAATCCATGCTTGTGAAAAATCC	TCONS_00024728	16	-	74239689	74249888	2	74239689,74249864,	74240064,74249888,	XLOC_012007	Gene_id=XLOC_012007;Gene_name=linc-ZFHX3-2;Transcript_id=TCONS_00024728;Transcript_name=linc-ZFHX3-2;	XLOC_012007		Intergenic	HumanLincRNACatalog	399
p24917	0.34911	0.0309466	2.28285	up	5.00205	4.71328	4.9548	5.84671	6.77595	5.61999	0	CATGGGGTCTGTCATTTTTTAGCAGATTATTTTATGTGGAAATAAAGAAACCCATTGGGG	XR_109110.1	12	-	131472856	131474573	1	131472856,	131474573,	LOC100128840	ID=rna28062;Name=XR_109110.1;Parent=gene23402;Dbxref=GeneID:100128840,Genbank:XR_109110.1;gbkey=misc_RNA;product=uncharacterized LOC100128840;transcript_id=XR_109110.1|ID=gene23402;Name=LOC100128840;Dbxref=GeneID:100128840;gbkey=Gene;gene=LOC100128840	XR_109110.1		Intronic	RefSeq	1717
p3400	0.346721	0.00203343	2.52317	up	3.20111	3.76799	3.72013	4.87414	4.8356	4.9852	0	ATCTATTCCCTCCCCTTCTAAGAGGACCTCATTAAAGAGTGGAATGATTTCACAGATTCA	ENST00000544339.1	12	-	121067907	121077956	2	121067907,121077852,	121068299,121077956,	ENSG00000256008.1	gene_id "ENSG00000256008.1"; transcript_id "ENST00000544339.1"; gene_type "antisense"; gene_status "NOVEL"; gene_name "RP11-728G15.1"; transcript_type "antisense"; transcript_status "KNOWN"; transcript_name "RP11-728G15.1-001"; level 2; tag "basic"; havana_gene "OTTHUMG00000169186.1"; havana_transcript "OTTHUMT00000402779.1";	ENST00000544339.1		Antisense	ENSEMBL	496
p5255	0.348733	0.0218931	3.77572	up	3.5046	3.92453	4.24445	5.65608	6.70558	5.06217	0	TTCCCAGAAGACTGGTTTTGTCTAAGACAGAAAATATGACCACTGACAGCTTCTGAGTGT	ENST00000568087.1	15	-	74202112	74220283	4	74202112,74204525,74212178,74220117,	74202191,74204644,74212379,74220283,	ENSG00000261801.1	gene_id "ENSG00000261801.1"; transcript_id "ENST00000568087.1"; gene_type "antisense"; gene_status "NOVEL"; gene_name "LOXL1-AS1"; transcript_type "antisense"; transcript_status "KNOWN"; transcript_name "LOXL1-AS1-009"; level 2; tag "basic"; havana_gene "OTTHUMG00000172711.2"; havana_transcript "OTTHUMT00000420127.1";	ENST00000568087.1	LOXL1-AS1	Antisense	ENSEMBL	565
p28034	0.352697	0.0439574	2.47371	up	2.46371	3.34113	2.76325	4.32004	4.70857	3.4595	0	CTTCCTTTGTTCGCGGGGAAGGGCTCCGGTGCCCCTACCCCGAGGCAGCTGCTAGATGGC	nc-HOXC10-129	12	+	52664779	52665040	1	52664779,	52665040,	nc-HOXC10-129	transcript_type=TAR Transcripts	nc-HOXC10-129		Intergenic	HOX Loci	262
p5123	0.353608	0.0458193	2.49179	up	3.07639	3.20288	3.61933	4.73609	5.29451	3.81954	0	TTAATGAGGATTTCTTAAGTCTGGAATCTGGGTACTTCCAGTCTTAGGCCAAAGCCACGC	ENST00000562063.1	15	-	42063129	42064930	2	42063129,42064628,	42063161,42064930,	ENSG00000260814.1	gene_id "ENSG00000260814.1"; transcript_id "ENST00000562063.1"; gene_type "processed_transcript"; gene_status "NOVEL"; gene_name "RP11-107F6.3"; transcript_type "processed_transcript"; transcript_status "KNOWN"; transcript_name "RP11-107F6.3-001"; level 2; tag "basic"; havana_gene "OTTHUMG00000172724.1"; havana_transcript "OTTHUMT00000420247.1";	ENST00000562063.1		Divergent	ENSEMBL	334
p28247	0.354588	0.0482587	3.11011	up	6.63358	5.91651	5.52476	7.97646	8.29638	6.71291	0	AGCAAAAGCATGATGAAATCAAGGCCTTGTGCTGTGTCACTCAAACAACCACTCCAGAAC	ASO3452	None	None	None	None	None	None	None	ASO3452	Accession=CR617865;Description=full-length cDNA clone CS0DF021YD16 of Fetal brain of Homo sapiens (human).	asoverlaps_511_1683		Antisense	RNAdb	1683
p15356	0.348944	0.0251675	4.06846	up	4.22751	4.67159	4.63329	6.77394	7.3685	5.46341	0	GTGGAAAAGCCTTTAACAATTCGTCATATTGTGTTCAACATCAGAGACTTACTACTGAAC	ENST00000430271.1	7	+	63539166	63545179	2	63539166,63544971,	63539706,63545179,	ENSG00000244117.1	gene_id "ENSG00000244117.1"; transcript_id "ENST00000430271.1"; gene_type "processed_transcript"; gene_status "PUTATIVE"; gene_name "RP11-3N2.1"; transcript_type "processed_transcript"; transcript_status "PUTATIVE"; transcript_name "RP11-3N2.1-001"; level 2; tag "basic"; havana_gene "OTTHUMG00000156469.1"; havana_transcript "OTTHUMT00000344299.1";	ENST00000430271.1		Divergent	ENSEMBL	748
p29962	0.346721	0.0160318	2.02701	up	3.31768	3.51373	3.76408	4.23093	4.45223	4.9704	0	TATTGATCATGGTACTGCGCAAGACTTTTCAGGAGAGTTTGGTCATCTCCCATGATGCCA	TCONS_00014019	7	-	155056156	155059857	2	155056156,155058310,	155057796,155059857,	XLOC_006663	Gene_id=XLOC_006663;Gene_name=linc-PAXIP1-6;Transcript_id=TCONS_00014019;Transcript_name=linc-PAXIP1-6;	XLOC_006663		Intergenic	HumanLincRNACatalog	3187
p18475	0.354588	0.0488789	3.1172	up	2.35891	3.50395	3.81858	4.81897	5.55389	4.22933	0	TCCTATGAGAAAGTCATATTCTCTGATAGCATCTTTGGTCACCTGAAACCTAGTGTCCAT	TCONS_00019940	11	+	68039996	68041986	2	68039996,68041828,	68040089,68041986,	XLOC_009185	Gene_id=XLOC_009185;Gene_name=linc-LRP5-1;Transcript_id=TCONS_00019940;Transcript_name=linc-LRP5-1;	XLOC_009185		Divergent	HumanLincRNACatalog	251
p33787	0.34911	0.0299197	3.40714	up	7.19875	5.91456	5.63926	8.17032	8.3332	7.55473	0	ATGCTGAGCGAAGCTATAGGCTCTTGTTGGATAAAAGCTTTTTTAACAGACATGGTTTCA	uc002foi.3	16	+	89761255	89762772	3	89761255,89761700,89762002,	89761478,89761753,89762772,	CDK10	proteinID=;alignID=uc002foi.3;kgID=uc002foi.3;mRNA=AB209829;spID=;refseq=;protAcc=;description=Homo sapiens cyclin-dependent kinase 10 (CDK10), transcript variant e, non-coding RNA.;rfamAcc=;tRnaName=;	uc002foi.3		Antisense	UCSC	1046
p7144	0.346745	0.0176426	2.94512	up	3.50718	3.84679	4.39513	5.74205	5.81671	4.86531	0	TTGCCCAGAGCGAATGAGTTGTTATCCATTTCAGTAATAATGATAACCAGATATGTCTGA	ENST00000571689.1	17	+	5095398	5138938	8	5095398,5113044,5117344,5118441,5126611,5137118,5137887,5138242,	5095458,5113190,5117504,5118588,5126779,5137237,5138106,5138938,	ENSG00000261879.1	gene_id "ENSG00000261879.1"; transcript_id "ENST00000571689.1"; gene_type "antisense"; gene_status "NOVEL"; gene_name "RP11-333E1.1"; transcript_type "antisense"; transcript_status "KNOWN"; transcript_name "RP11-333E1.1-001"; level 2; tag "basic"; havana_gene "OTTHUMG00000177801.2"; havana_transcript "OTTHUMT00000438999.1";	NR_034082;RefSeq_2017_1728		Antisense	ENSEMBL	1715
p19984	0.34911	0.0303691	3.72228	up	3.89813	4.30503	3.96088	6.33096	6.67922	4.84241	0	TCTCAGTGACCACAATATGAATGGGAACAGCAAGATGGCAAAAGCTTGCTGAGTGGTACA	TCONS_00024800	16	+	3661779	3693096	3	3661779,3690715,3692892,	3662007,3691238,3693096,	XLOC_011630	Gene_id=XLOC_011630;Gene_name=linc-DNASE1-1;Transcript_id=TCONS_00024800;Transcript_name=linc-DNASE1-1;	XLOC_011630		Divergent	HumanLincRNACatalog	955
p17562	0.348733	0.0221002	2.07449	up	5.43612	5.35466	5.76349	6.79028	6.05007	6.87218	0	GGACACCCAGTTTCAAAATCTCAGTGTCATTTTTTACTTCTCTCTTTTCAGGTTGTTTAA	TCONS_00001827	1	-	219582616	219632787	4	219582616,219585059,219622371,219632199,	219583609,219585281,219622575,219632787,	XLOC_001208	Gene_id=XLOC_001208;Gene_name=linc-GPATCH2-9;Transcript_id=TCONS_00001827;Transcript_name=linc-GPATCH2-9;	XLOC_001208		Intergenic	HumanLincRNACatalog	2007
p18451	0.346721	0.0130323	2.14218	up	3.3999	3.47402	4.14844	4.67185	4.97114	4.67662	0	CAAGAGAAACTGGTTTGAACAACTACTGAGTGTAACATAGGAAGCGCATTTCATTTGATA	TCONS_00019292	11	+	45377042	45378165	2	45377042,45377946,	45377153,45378165,	XLOC_009120	Gene_id=XLOC_009120;Gene_name=linc-SLC35C1-5;Transcript_id=TCONS_00019292;Transcript_name=linc-SLC35C1-5;	XLOC_009120		Intergenic	HumanLincRNACatalog	330
p16219	0.348944	0.0229452	2.03064	up	7.44516	7.45973	7.80174	8.84232	8.85854	8.07159	0	TGATGTGCTGGGTCTGATAAAAAGTGATCCCAACAGAAAGTTCCTCTCATCTCCAGCCTA	ENST00000517689.1	8	+	67104943	67108625	4	67104943,67105492,67106646,67108250,	67105202,67105546,67106750,67108625,	ENSG00000253138.1	gene_id "ENSG00000253138.1"; transcript_id "ENST00000517689.1"; gene_type "lincRNA"; gene_status "NOVEL"; gene_name "RP11-366K18.3"; transcript_type "lincRNA"; transcript_status "KNOWN"; transcript_name "RP11-366K18.3-002"; level 2; tag "dotter_confirmed"; havana_gene "OTTHUMG00000164475.1"; havana_transcript "OTTHUMT00000378930.1";	TCONS_00014496;XLOC_006827		Intergenic	ENSEMBL	792
p12836	0.348944	0.0245218	2.48096	up	4.25839	4.10117	4.16773	6.01586	5.66992	4.7742	0	TGGAGTTGAAGAATTTTCCAGTGAGTTCCATCAAAGTAAATAAACCAACCTAGAGCATCA	ENST00000508286.1	4	+	109094574	109097586	3	109094574,109096947,109097445,	109094675,109097149,109097586,	ENSG00000232021.2	gene_id "ENSG00000232021.2"; transcript_id "ENST00000508286.1"; gene_type "processed_transcript"; gene_status "NOVEL"; gene_name "LEF1-AS1"; transcript_type "antisense"; transcript_status "KNOWN"; transcript_name "LEF1-AS1-007"; level 2; tag "basic"; havana_gene "OTTHUMG00000161028.1"; havana_transcript "OTTHUMT00000363479.1";	ENST00000508286.1	LEF1-AS1	Antisense	ENSEMBL	444
p37577_v4	0.353608	0.0469156	3.35924	up	2.70516	3.19101	3.6306	5.20301	5.71397	3.8542	0	GGGTTCGCTTAATGTTCTTTAGCCTTTGTACATAGAATATATAAATGTCGTGAGTCATCT	ENST00000609552.1	4	+	83295453	83296065	1	83295453,	83296065,	ENSG00000272677.1	gene_id "ENSG00000272677.1"; transcript_id "ENST00000609552.1"; gene_type "antisense"; gene_status "NOVEL"; gene_name "RP11-127B20.3"; transcript_type "antisense"; transcript_status "KNOWN"; transcript_name "RP11-127B20.3-002"; level 2; tag "basic"; havana_gene "OTTHUMG00000186309.2"; havana_transcript "OTTHUMT00000472826.1";			Antisense	ENSEMBL	612
p37252_v4	0.354588	0.0482009	7.02305	up	3.57698	3.02118	4.08786	6.55269	7.92521	4.64442	0	GGAGATCTTACCTTAAGCAATGGGATTACCATTAAGTACAAGACATTTGACATTAAACCA	ENST00000603720.1	2	-	121623952	121624978	2	121623952,121624684,	121624366,121624978,	ENSG00000271709.1	gene_id "ENSG00000271709.1"; transcript_id "ENST00000603720.1"; gene_type "lincRNA"; gene_status "NOVEL"; gene_name "RP11-297J22.1"; transcript_type "lincRNA"; transcript_status "KNOWN"; transcript_name "RP11-297J22.1-001"; level 2; tag "basic"; havana_gene "OTTHUMG00000185284.1"; havana_transcript "OTTHUMT00000470050.1";			Intergenic	ENSEMBL	708
p8309	0.346924	0.019429	2.28531	up	3.77588	4.52823	4.4997	5.48979	5.7862	5.10499	0	TTGGCTTTAGCAAACAAGCATTAAGTGAATAAACTGTTCCACTTTCTTCCTTCCCAGGTT	ENST00000588286.1	19	-	36032483	36036394	1	36032483,	36036394,	ENSG00000236144.2	gene_id "ENSG00000236144.2"; transcript_id "ENST00000588286.1"; gene_type "antisense"; gene_status "NOVEL"; gene_name "AD000090.2"; transcript_type "antisense"; transcript_status "KNOWN"; transcript_name "AD000090.2-004"; level 2; tag "basic"; havana_gene "OTTHUMG00000048104.2"; havana_transcript "OTTHUMT00000460430.1";	ENST00000588286.1	AD000090.2	Antisense	ENSEMBL	3911
p20045	0.346721	0.00746156	2.45929	up	4.774	4.80229	5.29077	6.511	6.38583	5.86494	0	TTCTTCTTCAGGTAACCACAGAGTCTGAGCACTATCAAAAATTCTTCCTGGGCCAGGCAT	TCONS_00024420	16	+	53412401	53423133	2	53412401,53418085,	53412516,53423133,	XLOC_011728	Gene_id=XLOC_011728;Gene_name=linc-RBL2-1;Transcript_id=TCONS_00024420;Transcript_name=linc-RBL2-1;	XLOC_011728		Intergenic	HumanLincRNACatalog	5163
p28391	0.348733	0.0218431	2.51241	up	5.64749	6.57453	5.6176	7.22559	7.61796	6.98329	0	TGTCAAGCAGTAGATCTGTTTTGGGGAAAGTCTGCAAAAATGTCACATAAAAAGAATTGG	ASO1646	None	None	None	None	None	None	None	ASO1646	Accession=AF086377;Description=Homo sapiens full length insert cDNA clone ZD69A07.	asoverlaps_898_638		Antisense	RNAdb	638
p2005	0.346924	0.018707	2.32737	up	3.56266	3.50295	4.30029	5.31769	5.03966	4.66465	0	TGAATTGTATAAGAATTTGAAGGAATTGAGGAGCTAAAGAGCATGTGCGCACAGATATGA	ENST00000416076.1	10	+	75764894	75787673	2	75764894,75787375,	75765038,75787673,	ENSG00000225761.1	gene_id "ENSG00000225761.1"; transcript_id "ENST00000416076.1"; gene_type "sense_intronic"; gene_status "NOVEL"; gene_name "RP11-417O11.5"; transcript_type "sense_intronic"; transcript_status "KNOWN"; transcript_name "RP11-417O11.5-001"; level 2; tag "basic"; havana_gene "OTTHUMG00000018491.1"; havana_transcript "OTTHUMT00000048713.1";	ENST00000416076.1		Sense	ENSEMBL	442
p15981	0.346721	0.0152464	2.20631	up	2.67656	3.46993	3.41832	4.43039	4.45752	4.10181	0	CCCTCCCTGCAGGGTGCTGTTTCCTGAAGGAAAATATTCAATTACTATTTTCTTTATTTA	ENST00000518049.1	8	-	144448800	144450718	1	144448800,	144450718,	ENSG00000254389.2	gene_id "ENSG00000254389.2"; transcript_id "ENST00000518049.1"; gene_type "antisense"; gene_status "KNOWN"; gene_name "RHPN1-AS1"; transcript_type "antisense"; transcript_status "KNOWN"; transcript_name "RHPN1-AS1-001"; level 2; tag "basic"; havana_gene "OTTHUMG00000165005.1"; havana_transcript "OTTHUMT00000381416.1";	NR_026785;RefSeq_1725_2013	RHPN1-AS1	Antisense	ENSEMBL	1918
p29141	0.35077	0.0395039	2.69843	up	7.27668	6.81145	6.32921	8.80567	8.41484	7.49319	0	CTTGGCAGAGCCAGAGTGTACACATTCCTAAACCATTAAACAGATTTCTATAACAAAAAA	ENST00000574180.1	16	-	46656772	46658363	1	46656772,	46658363,	ENSG00000261512.2	gene_id "ENSG00000261512.2"; transcript_id "ENST00000574180.1"; gene_type "lincRNA"; gene_status "NOVEL"; gene_name "RP11-46D6.1"; transcript_type "lincRNA"; transcript_status "KNOWN"; transcript_name "RP11-46D6.1-002"; level 2; tag "basic"; havana_gene "OTTHUMG00000175597.2"; havana_transcript "OTTHUMT00000439485.1";	ENST00000574180.1		Intergenic	ENSEMBL	1591
p28322	0.346721	0.00832355	2.90003	up	4.53756	4.55567	4.35564	6.26831	6.38607	5.4027	0	TAATGGGAAAACATATGAGGTCAGAAGTCAAGAAACTGGGGACATCTTGACCTGACCCCT	ASO1672	None	None	None	None	None	None	None	ASO1672	Accession=AF147342;Description=Homo sapiens full length insert cDNA clone YB31A06.	asoverlaps_904_627		Antisense	RNAdb	627
p34471_v4	0.34911	0.0287719	2.50695	up	6.71377	5.92991	5.502	7.61319	7.4826	7.0277	0	GGATGAGTTTCATGGCCATCTCTAACTAAGGACAGGACATCGATGTCATCTGTAACTTCC	ENST00000576250.1	16	-	3101991	3109364	4	3101991,3104940,3105736,3108996,	3102099,3105033,3105946,3109364,	ENSG00000261971.2	gene_id "ENSG00000261971.2"; transcript_id "ENST00000576250.1"; gene_type "antisense"; gene_status "NOVEL"; gene_name "RP11-473M20.7"; transcript_type "antisense"; transcript_status "KNOWN"; transcript_name "RP11-473M20.7-001"; level 2; tag "basic"; havana_gene "OTTHUMG00000177474.1"; havana_transcript "OTTHUMT00000437107.1";	ENST00000576250.1		Antisense	ENSEMBL	779
p22447	0.352682	0.043572	4.58535	up	4.71328	4.88766	4.42205	7.24287	7.92994	5.44129	0	ACAAGGTGGACCTAAAACTGGGTGACTTGAAACAGTAAGTATTTTTAGTTCTTGATTCTG	TCONS_00007987	4	+	11315541	11339069	4	11315541,11330174,11338388,11338946,	11315564,11330335,11338456,11339069,	XLOC_003455	Gene_id=XLOC_003455;Gene_name=linc-CPEB2-11;Transcript_id=TCONS_00007987;Transcript_name=linc-CPEB2-11;	XLOC_003455		Intergenic	HumanLincRNACatalog	375
p8094	0.348681	0.0209807	3.09912	up	4.15009	4.19727	3.32494	6.13372	4.96152	5.47263	0	TGTTTCTTTTTCCTTTTTTGGACAGTTAAGCTACAGCGATGGGCCAACTGGCACCAGTGT	ENST00000589723.1	18	+	77338062	77349010	4	77338062,77341492,77345070,77346639,	77339420,77341710,77345290,77349010,	ENSG00000267287.1	gene_id "ENSG00000267287.1"; transcript_id "ENST00000589723.1"; gene_type "processed_transcript"; gene_status "NOVEL"; gene_name "RP11-567M16.1"; transcript_type "lincRNA"; transcript_status "KNOWN"; transcript_name "RP11-567M16.1-001"; level 2; tag "basic"; havana_gene "OTTHUMG00000180269.1"; havana_transcript "OTTHUMT00000450522.1";	ENST00000589723.1		Intergenic	ENSEMBL	4167
p18868	0.346721	0.00601995	2.02306	up	4.12255	4.66724	4.6294	5.36306	5.62474	5.48101	0	CAGATGGAAGCTCCTGATACCAGTGGTCCAGTAGTGTATTCTAAGTACAAATACTTTTTG	TCONS_00020465	12	+	69800946	69801567	2	69800946,69801258,	69801054,69801567,	XLOC_009798	Gene_id=XLOC_009798;Gene_name=linc-FRS2-2;Transcript_id=TCONS_00020465;Transcript_name=linc-FRS2-2;	XLOC_009798		Intergenic	HumanLincRNACatalog	417
p2484	0.347969	0.0201432	2.41967	up	7.14113	6.91034	6.61065	7.95718	8.7612	7.76818	0	CACTTAATATGTTTGTTTTGCTATTTTGGCTCTGCAATCATAATGACCTACCTATCTCCA	ENST00000525548.1	11	-	107975800	107992411	4	107975800,107977427,107980997,107992022,	107976153,107977525,107981121,107992411,	ENSG00000255467.1	gene_id "ENSG00000255467.1"; transcript_id "ENST00000525548.1"; gene_type "antisense"; gene_status "NOVEL"; gene_name "RP11-144G7.2"; transcript_type "antisense"; transcript_status "KNOWN"; transcript_name "RP11-144G7.2-001"; level 1; tag "basic"; tag "exp_conf"; havana_gene "OTTHUMG00000166384.1"; havana_transcript "OTTHUMT00000389505.1";	ENST00000525548.1		Antisense	ENSEMBL	964
p28474	0.34911	0.0326367	2.01385	up	6.07446	5.86004	5.46228	6.94234	7.17507	6.30925	0	GCATGAATAGTCATCACTGTTTCTATAATACTGAAACACTCAAATCTGTTTCTGCCTCGT	ASO1661	None	None	None	None	None	None	None	ASO1661	Accession=AF124367;Description=Homo sapiens IMAGE Consortium ID 342479, mRNA sequence.	asoverlaps_906_614		Antisense	RNAdb	614
p12345	0.346721	0.00897786	4.46438	up	3.90863	2.83919	3.01115	5.73073	4.78975	5.71387	0	GAGAAGCCAATAGGCAAAGTAAGAATGAACCTACTTTTATCAGACACTATGATTCGAGCC	ENST00000514050.1	4	-	82523950	82965397	4	82523950,82745670,82836463,82965153,	82524076,82745724,82836511,82965397,	ENSG00000251331.1	gene_id "ENSG00000251331.1"; transcript_id "ENST00000514050.1"; gene_type "processed_transcript"; gene_status "NOVEL"; gene_name "RP11-689K5.3"; transcript_type "processed_transcript"; transcript_status "KNOWN"; transcript_name "RP11-689K5.3-002"; level 2; havana_gene "OTTHUMG00000161063.1"; havana_transcript "OTTHUMT00000363619.1";	ENST00000514050.1		Intergenic	ENSEMBL	472
p29298	0.346721	0.0169918	2.9131	up	8.59396	8.33216	8.50015	9.89369	10.7368	9.42347	0	GGAAGTAGAATATATATATACATATAAAATTGGTTGGGAGCCACGTGTACCAGTGTGTGT	ENST00000371743.3	20	+	47894714	47905797	5	47894714,47895640,47897021,47897439,47905581,	47895253,47895745,47897107,47897501,47905797,	ENSG00000177410.8	gene_id "ENSG00000177410.8"; transcript_id "ENST00000371743.3"; gene_type "antisense"; gene_status "KNOWN"; gene_name "ZFAS1"; transcript_type "antisense"; transcript_status "KNOWN"; transcript_name "ZFAS1-001"; level 2; tag "basic"; havana_gene "OTTHUMG00000032698.3"; havana_transcript "OTTHUMT00000079651.3";	NR_003604;RefSeq_2799_1006	ZFAS1	Antisense	ENSEMBL	1008
p26205	0.328765	0.000270923	2.02247	up	4.17286	4.31332	4.28589	5.37722	5.30921	5.13399	0	CTTCTCCCCACTGCATAGATGTGGAAACTGACCTCAAGATGACTGTTTTAAAGCTATGTG	uc003dfw.1	3	-	52844727	52846754	1	52844727,	52846754,	AX746575	proteinID=;alignID=uc003dfw.1;kgID=uc003dfw.1;mRNA=AX746575;spID=;refseq=;protAcc=;description=Homo sapiens cDNA FLJ33368 fis, clone BRACE2005787.;rfamAcc=;tRnaName=;	UCSC_4839_2027		Divergent	UCSC	2027
p23648	0.34911	0.0310954	3.78461	up	5.96045	5.11494	6.04643	8.31775	7.9293	6.6352	0	TCTCCCTCAGTCCAGGCTTTGTGCCAGATTATCTCACGGATCCTCACAAGTACACAGCCT	TCONS_00013784	7	-	42366037	42368604	2	42366037,42368449,	42366089,42368604,	XLOC_006419	Gene_id=XLOC_006419;Gene_name=linc-GLI3-3;Transcript_id=TCONS_00013784;Transcript_name=linc-GLI3-3;	XLOC_006419		Intergenic	HumanLincRNACatalog	207
p26746	0.346721	0.00943259	3.02823	up	5.67702	5.38911	5.86711	7.63385	7.46823	6.62657	0	AAATTTAGACAGTGTTGAGAAAACCAAACTTTGGCCATAGAAACCATTCCCCTCCCGGGC	HIT000071394	19	+	49340353	49340557	1	49340353,	49340557,	HIX0040211	None	H-InvDB_3067_204		Antisense	H-InvDB	204
p301	0.346721	0.0121576	2.92659	up	4.16264	4.21023	3.35461	5.74917	5.60608	5.01991	0	CTGAGACCTGAATGTATCCCCATTTTAAAGAACCTAACAGAACATTAAAATTGTTTCCTG	ENST00000444665.1	1	-	95708780	95729610	2	95708780,95729540,	95709081,95729610,	ENSG00000228852.2	gene_id "ENSG00000228852.2"; transcript_id "ENST00000444665.1"; gene_type "antisense"; gene_status "NOVEL"; gene_name "RP11-57H12.5"; transcript_type "antisense"; transcript_status "KNOWN"; transcript_name "RP11-57H12.5-001"; level 2; tag "basic"; havana_gene "OTTHUMG00000010851.2"; havana_transcript "OTTHUMT00000029947.1";	ENST00000444665.1		Antisense	ENSEMBL	371
p33767	0.350581	0.0376994	5.16338	up	5.03751	3.44273	3.6141	6.95541	7.01655	5.22733	0	CACATGTAACAGATTCCTTTATATGTAGTGGAAATCACTATTTGTAGAAACTGTCAGGTC	uc001vrl.3	13	-	111530886	111534389	1	111530886,	111534389,	DKFZp686B07190	proteinID=;alignID=uc001vrl.3;kgID=uc001vrl.3;mRNA=AK125100;spID=;refseq=;protAcc=;description=Homo sapiens cDNA FLJ20104 fis, clone COL04806.;rfamAcc=;tRnaName=;	uc001vrl.3		Antisense	UCSC	3503
p4873	0.350581	0.038608	2.86693	up	7.24102	7.58004	7.31117	8.91806	9.73479	8.03791	0	GCAGCGCTGGATTATGGCAATTTACCTTATAATAACTCACCATAGTTGGCTGTTATAAGA	ENST00000555271.1	14	+	70833708	70838831	2	70833708,70838488,	70834043,70838831,	ENSG00000258889.1	gene_id "ENSG00000258889.1"; transcript_id "ENST00000555271.1"; gene_type "lincRNA"; gene_status "NOVEL"; gene_name "RP11-718G2.4"; transcript_type "lincRNA"; transcript_status "KNOWN"; transcript_name "RP11-718G2.4-002"; level 2; tag "basic"; havana_gene "OTTHUMG00000171326.1"; havana_transcript "OTTHUMT00000413006.1";	ENST00000555271.1		Intergenic	ENSEMBL	678
p7514	0.348681	0.020713	2.81572	up	2.71273	3.22967	3.29928	4.84631	5.01131	3.86457	0	GGTGGGGTTGGGGGTTCCCCAACTGGAAGTATTTAAAGCTCATCTAATTATGCACTTAAA	ENST00000586076.1	17	+	73872452	73875627	1	73872452,	73875627,	ENSG00000267801.1	gene_id "ENSG00000267801.1"; transcript_id "ENST00000586076.1"; gene_type "antisense"; gene_status "NOVEL"; gene_name "RP11-552F3.9"; transcript_type "antisense"; transcript_status "KNOWN"; transcript_name "RP11-552F3.9-001"; level 2; tag "basic"; havana_gene "OTTHUMG00000179917.1"; havana_transcript "OTTHUMT00000448941.1";	ASO1876;asoverlaps_88_3186		Antisense	ENSEMBL	3175
p28634	0.348944	0.0261561	3.38687	up	2.67443	1.65844	2.74249	4.26011	4.67914	3.41597	0	AGGCTATAAAAACCACCTTTTCGAAGTGGAGACCTCTATAAAATGAAATGATTCTATACC	ASO1778	None	None	None	None	None	None	None	ASO1778	Accession=AK091264;Description=Homo sapiens cDNA FLJ33945 fis, clone CTONG2018279.	asoverlaps_197_2495		Antisense	RNAdb	2495
p7584	0.346721	0.0122493	2.06866	up	3.22061	2.92946	2.64975	4.26548	3.65755	4.02288	0	CAATCAGAGCTCTGGTCTCTGGAATTAAGCATCATCAAGCTCTCCTATTAATAAATTTAA	ENST00000580612.1	18	-	903985	905041	3	903985,904149,904882,	904065,904349,905041,	ENSG00000265179.1	gene_id "ENSG00000265179.1"; transcript_id "ENST00000580612.1"; gene_type "processed_transcript"; gene_status "NOVEL"; gene_name "RP11-672L10.2"; transcript_type "antisense"; transcript_status "KNOWN"; transcript_name "RP11-672L10.2-003"; level 2; tag "basic"; havana_gene "OTTHUMG00000178281.2"; havana_transcript "OTTHUMT00000441684.1";	ENST00000580612.1		Antisense	ENSEMBL	439
p16415	0.349343	0.034026	2.20967	up	3.5712	4.07056	3.824	5.54093	4.96348	4.39285	0	CCAGCTGATTTAATACTCATGATAAACCCAGTAGACAGATGTGCATATATCACTTCAAAA	ENST00000523002.1	8	+	144494918	144499224	3	144494918,144495361,144499079,	144495026,144495652,144499224,	ENSG00000253931.1	gene_id "ENSG00000253931.1"; transcript_id "ENST00000523002.1"; gene_type "antisense"; gene_status "NOVEL"; gene_name "RP11-909N17.2"; transcript_type "antisense"; transcript_status "KNOWN"; transcript_name "RP11-909N17.2-001"; level 1; tag "basic"; tag "exp_conf"; havana_gene "OTTHUMG00000165016.1"; havana_transcript "OTTHUMT00000381459.1";	ENST00000523002.1		Antisense	ENSEMBL	544
p9891	0.34911	0.0312782	2.19073	up	2.99958	2.97804	2.67301	4.03359	4.57941	3.43186	0	GCTGGCGTCGGTGAACCCGACAGACTATGGATTTATCATTTAATAAAGCATTGATTCATT	ENST00000451384.2	2	+	98286208	98319519	10	98286208,98287793,98290918,98292093,98292307,98305357,98306718,98315488,98317616,98319131,	98286297,98287962,98291020,98292184,98292391,98305456,98306790,98315599,98317767,98319519,	ENSG00000228486.3	gene_id "ENSG00000228486.3"; transcript_id "ENST00000451384.2"; gene_type "processed_transcript"; gene_status "NOVEL"; gene_name "AC017099.3"; transcript_type "antisense"; transcript_status "KNOWN"; transcript_name "AC017099.3-001"; level 1; tag "basic"; tag "exp_conf"; havana_gene "OTTHUMG00000153062.2"; havana_transcript "OTTHUMT00000329293.2";	ENST00000451384.2		Antisense	ENSEMBL	1356
p18491	0.348944	0.0250223	3.58545	up	3.17635	4.64829	3.76515	6.24355	5.69647	5.17623	0	AGCTAGAGAATGGCATGTGCAAAGATACAGAGTTCTGTAAACCAGAAATCTAAAATCAGT	TCONS_00019402	11	+	77850863	77852469	2	77850863,77852441,	77851118,77852469,	XLOC_009224	Gene_id=XLOC_009224;Gene_name=linc-USP35-1;Transcript_id=TCONS_00019402;Transcript_name=linc-USP35-1;	XLOC_009224		Divergent	HumanLincRNACatalog	283
p13722	0.350435	0.0352103	2.51603	up	8.38502	8.69655	8.56658	9.53065	10.7086	9.40235	0	TCAAAGCTTGCACTCAAGTAGGTGATTGATAGGTGATACTAACTCCCCTGAACCTGTCTC	ENST00000512650.1	5	+	76369705	76370345	2	76369705,76370317,	76370062,76370345,	ENSG00000250615.1	gene_id "ENSG00000250615.1"; transcript_id "ENST00000512650.1"; gene_type "antisense"; gene_status "NOVEL"; gene_name "CTC-564N23.2"; transcript_type "antisense"; transcript_status "KNOWN"; transcript_name "CTC-564N23.2-001"; level 2; tag "basic"; havana_gene "OTTHUMG00000162471.2"; havana_transcript "OTTHUMT00000369060.2";	TCONS_00009428;XLOC_004435	CTC-564N23.2	Antisense	ENSEMBL	385
p8714	0.350581	0.0358389	7.62677	up	3.49708	2.7022	3.92174	6.82326	7.48709	4.60388	0	CTGCATTTTTGCCTTACGATTACATACCTTAATAATTACAACTCAATTGAGGGGTCCATA	ENST00000585467.1	19	+	37119694	37121092	2	37119694,37120756,	37119908,37121092,	ENSG00000266935.1	gene_id "ENSG00000266935.1"; transcript_id "ENST00000585467.1"; gene_type "lincRNA"; gene_status "NOVEL"; gene_name "CTD-3234P18.2"; transcript_type "lincRNA"; transcript_status "KNOWN"; transcript_name "CTD-3234P18.2-001"; level 2; tag "basic"; havana_gene "OTTHUMG00000180896.1"; havana_transcript "OTTHUMT00000453535.1";	ENST00000585467.1	CTD-3234P18.2	Intergenic	ENSEMBL	550
p20858	0.351166	0.0405294	3.21192	up	4.55575	3.56844	3.63078	5.87365	6.2358	4.69582	0	GACTTCTTTAAGGGCATGATGGCAAACATCCTCATTGTAATTCCTTTGGATGGATCATTT	TCONS_00004286	2	-	65196935	65197921	2	65196935,65197705,	65197394,65197921,	XLOC_002131	Gene_id=XLOC_002131;Gene_name=linc-SERTAD2-2;Transcript_id=TCONS_00004286;Transcript_name=linc-SERTAD2-2;	XLOC_002131		Intergenic	HumanLincRNACatalog	675
p25005	0.346721	0.0063789	2.1768	up	2.98659	2.9151	3.28375	4.23804	4.46952	3.84451	0	TAAAACAGATGGTTCCTGCCGACAGGGTCTGTATAGTTATCAGATTTTCTGTGCGATGGC	NR_004388.1	15	-	66639543	66639680	1	66639543,	66639680,	SCARNA14	ID=rna31302;Name=NR_004388.1;Parent=gene26598;Dbxref=GeneID:692149,Genbank:NR_004388.1,HGNC:32571;gbkey=misc_RNA;product=small Cajal body-specific RNA 14;transcript_id=NR_004388.1|ID=gene26598;Name=SCARNA14;Dbxref=GeneID:692149,HGNC:32571;description=small Cajal body-specific RNA 14;gbkey=Gene;gene=SCARNA14;gene_synonym=U100	NR_004388.1		Intronic	RefSeq	137
p16613	0.350581	0.0379139	3.05094	up	2.37196	3.32174	2.84153	4.80792	4.99459	3.56048	0	CTTCATAAAACGCAATAATAAAACGAAGCTGAGTGTTGCTAAACACAGGCTCATTGTATA	ENST00000567068.1	9	-	124577952	124581731	1	124577952,	124581731,	ENSG00000261534.1	gene_id "ENSG00000261534.1"; transcript_id "ENST00000567068.1"; gene_type "sense_overlapping"; gene_status "NOVEL"; gene_name "RP11-244O19.1"; transcript_type "sense_overlapping"; transcript_status "KNOWN"; transcript_name "RP11-244O19.1-001"; level 2; tag "basic"; havana_gene "OTTHUMG00000175795.1"; havana_transcript "OTTHUMT00000431084.1";	ENST00000567068.1		Sense	ENSEMBL	3779
p36316_v4	0.352697	0.0436929	2.56759	up	4.1658	3.75681	2.88648	5.48919	4.55357	4.84759	0	TGGCTTGGAAGGAGGGAATTCATCAGAAGGGTCTACCCCATGCTCTTGGAACCTCAAGAA	TCONS_00017655	Y	+	23300673	23332061	5	23300673,23310427,23313474,23314724,23331841,	23300754,23310481,23313528,23314859,23332061,	XLOC_008299	Gene_id=XLOC_008299;Gene_name=linc-RBMY1B-1;Transcript_id=TCONS_00017655;Transcript_name=linc-RBMY1B-1;	XLOC_008299		Intergenic	HumanLincRNACatalog	544
p42064_v4	0.350581	0.0377959	2.00815	up	6.46902	6.80724	7.13019	7.77988	8.28583	7.35836	0	CAAGATGCAAGATGTGTTGGTTGACACAATTTAATGGAAAACCATGCCACCCACGACCAT	NR_110304.1	10	+	77168914	77171082	3	77168914,77169887,77170049,	77169198,77169942,77171082,	none					RefSeq	1372
p26397	0.32948	0.000505639	4.80901	up	2.50863	2.30961	2.28089	4.8666	4.81355	4.21619	0	CACATAGCAAAAAATGGTCATTTCTGTAGTTGCAGCTCCAGATCTACAATAATCAATCTA	uc003ugj.1	7	-	77287972	77326662	2	77287972,77325212,	77288635,77326662,	LOC100505854	proteinID=;alignID=uc003ugj.1;kgID=uc003ugj.1;mRNA=BC037783;spID=;refseq=;protAcc=;description=Homo sapiens uncharacterized LOC100505854 (LOC100505854), non-coding RNA.;rfamAcc=;tRnaName=;	uc003ugj.1		Antisense	UCSC	2113
p34206_v4	0.348944	0.0274666	2.11675	up	5.01473	5.55474	5.42773	6.94923	6.25023	6.04328	0	ATCTGGACCTCAGTATTACCACATCTAGAGCTATAATCACATCCCTGTTAAGCCTTCCTG	ENST00000542086.1	12	-	26107737	26111998	4	26107737,26109159,26109571,26111864,	26108174,26109280,26109694,26111998,	ENSG00000246695.3	gene_id "ENSG00000246695.3"; transcript_id "ENST00000542086.1"; gene_type "antisense"; gene_status "NOVEL"; gene_name "RP11-877E17.2"; transcript_type "antisense"; transcript_status "KNOWN"; transcript_name "RP11-877E17.2-010"; level 2; tag "basic"; havana_gene "OTTHUMG00000169126.2"; havana_transcript "OTTHUMT00000402420.1";	ENST00000542086.1		Antisense	ENSEMBL	815
p1657	0.34911	0.0307441	2.84078	up	1.91867	2.82008	3.29055	4.18778	4.56742	3.79296	0	TCCTTTTGCTTAACCTTGTTTTAGTTAAGGTTTTAAACAGTTGCCACCAGTGTGCCCTAA	ENST00000417559.1	10	-	82289352	82295698	2	82289352,82295335,	82289587,82295698,	ENSG00000226659.1	gene_id "ENSG00000226659.1"; transcript_id "ENST00000417559.1"; gene_type "antisense"; gene_status "NOVEL"; gene_name "RP11-137H2.4"; transcript_type "antisense"; transcript_status "KNOWN"; transcript_name "RP11-137H2.4-001"; level 1; tag "basic"; tag "exp_conf"; havana_gene "OTTHUMG00000018616.1"; havana_transcript "OTTHUMT00000049090.1";	ENCODE_1331_598;TCONS_00018009;XLOC_008873		Antisense	ENSEMBL	598
p14932	0.346924	0.01848	2.04856	up	5.56787	5.69559	5.47715	6.78756	6.95681	6.10007	0	ACCTGGGCCCTTCTGGTATCTCCTGAATGAAAAACAAGGGATATTTAATAAATATGGATT	ENST00000580458.1	7	-	45022632	45026249	4	45022632,45023420,45023955,45026123,	45022921,45023645,45024025,45026249,	ENSG00000232956.3	gene_id "ENSG00000232956.3"; transcript_id "ENST00000580458.1"; gene_type "lincRNA"; gene_status "KNOWN"; gene_name "SNHG15"; transcript_type "lincRNA"; transcript_status "KNOWN"; transcript_name "SNHG15-008"; level 2; havana_gene "OTTHUMG00000179544.2"; havana_transcript "OTTHUMT00000447030.1";	ENST00000580458.1	SNHG15	Intergenic	ENSEMBL	710
p38339_v4	0.346721	0.0126738	8.48296	up	2.68088	3.7719	3.63449	6.88676	7.25064	5.20358	0	CCTCTCTGAGGCCATTATCCAAGCTGAAACCACCTTTTATAAGAAAAAAGTTTAAAGAAA	ENST00000425916.3	10	+	77162811	77168738	2	77162811,77167012,	77163109,77168738,	ENSG00000237149.4	gene_id "ENSG00000237149.4"; transcript_id "ENST00000425916.3"; gene_type "processed_transcript"; gene_status "KNOWN"; gene_name "ZNF503-AS2"; transcript_type "antisense"; transcript_status "KNOWN"; transcript_name "ZNF503-AS2-002"; level 2; tag "basic"; havana_gene "OTTHUMG00000018528.3"; havana_transcript "OTTHUMT00000048832.2";			Antisense	ENSEMBL	2024
p17586	0.348681	0.0203334	2.27767	up	3.58857	3.40866	3.28793	5.22526	4.36691	4.25566	0	TTTCTGCTGACAGCACTTCCTCATTAAATGCAGAGATCTGCAAAAAGGGAAAATAAAAAC	TCONS_00001884	1	-	235095420	235096128	2	235095420,235096028,	235095663,235096128,	XLOC_001265	Gene_id=XLOC_001265;Gene_name=linc-IRF2BP2-1;Transcript_id=TCONS_00001884;Transcript_name=linc-IRF2BP2-1;	XLOC_001265		Intergenic	HumanLincRNACatalog	343
p4585	0.354729	0.0499779	3.87052	up	2.38526	3.29752	3.25116	5.34713	5.76575	3.67864	0	GCACCTCGGTGCATTAAACTACAGCAAGACAGTTCATGGGAGAACCCAACATATGTCTTT	ENST00000555313.1	14	-	75081509	75083350	2	75081509,75083275,	75082037,75083350,	ENSG00000258976.1	gene_id "ENSG00000258976.1"; transcript_id "ENST00000555313.1"; gene_type "lincRNA"; gene_status "NOVEL"; gene_name "CTD-2207P18.2"; transcript_type "lincRNA"; transcript_status "KNOWN"; transcript_name "CTD-2207P18.2-001"; level 2; havana_gene "OTTHUMG00000171478.1"; havana_transcript "OTTHUMT00000413604.1";	ENST00000555313.1	CTD-2207P18.2	Intergenic	ENSEMBL	603
p25254	0.348672	0.0202602	4.43669	up	4.21564	4.99031	4.28463	6.71789	7.50918	5.71196	0	GGTCCAATGTGGGCCTCCTTTGAGGTAGACTGTATTTCATGAATTTATAATAAAATTCTA	NR_045114.1	3	-	110764161	110788806	4	110764161,110771350,110788110,110788636,	110764756,110771506,110788318,110788806,	PVRL3-AS1	ID=rna8731;Name=NR_045114.1;Parent=gene7047;Dbxref=GeneID:100506555,Genbank:NR_045114.1,HGNC:40813;gbkey=misc_RNA;product=PVRL3 antisense RNA 1;transcript_id=NR_045114.1|ID=gene7047;Name=PVRL3-AS1;Dbxref=GeneID:100506555,HGNC:40813;description=PVRL3 antisense RNA 1;gbkey=Gene;gene=PVRL3-AS1	UCSC:uc021xcg.1		Intergenic	RefSeq	1129
p22868	0.346721	0.013097	4.93955	up	2.89745	2.57156	2.78508	5.26507	5.85622	4.04594	0	TTTATTTCTTCAAGTACAAATAGTAAGTATTAACCATTTCGGATGGTTTGCATGTGCTCG	TCONS_00011109	5	-	180261302	180262712	2	180261302,180262053,	180261596,180262712,	XLOC_005111	Gene_id=XLOC_005111;Gene_name=linc-MGAT1-1;Transcript_id=TCONS_00011109;Transcript_name=linc-MGAT1-1;	XLOC_005111		Intergenic	HumanLincRNACatalog	953
p19104	0.348944	0.0228379	2.19924	up	6.3596	6.59968	7.20776	8.1182	7.488	7.97185	0	ATTGTAAGGAAAATACCCCCAAGGAAGTTGAGGACACAGCAGACTTGGACTGTCTCCAAA	TCONS_00022099	13	-	100738208	100741196	2	100738208,100740886,	100738981,100741196,	XLOC_010709	Gene_id=XLOC_010709;Gene_name=linc-ZIC5-1;Transcript_id=TCONS_00022099;Transcript_name=linc-ZIC5-1;	XLOC_010709		Divergent	HumanLincRNACatalog	1083
p25714	0.351166	0.0406762	2.48724	up	4.5693	4.58427	5.30914	6.59301	6.40395	5.40938	0	AACAGGTCCTTATATTACTGCAGCCCACAATGGAACTACTGAGTAGGAGCCAAAAGAGGA	uc021pku.1	1	+	235712454	235714587	1	235712454,	235714587,	AX747026	proteinID=;alignID=uc021pku.1;kgID=uc021pku.1;mRNA=AX747026;spID=;refseq=;protAcc=;description=Homo sapiens cDNA FLJ34187 fis, clone FCBBF3017233.;rfamAcc=;tRnaName=;	uc021pku.1		Antisense	UCSC	2133
p34210_v4	0.350581	0.0375153	2.91566	up	5.05014	4.67265	4.96473	6.59215	7.20309	5.52375	0	GATGAGTCACTGTATTCATTTGCTCCACAGAAGAAAGAATCTTCAGGCCTCTGCTCTTGT	ENST00000540625.1	12	-	26383751	26472653	3	26383751,26384855,26472534,	26384052,26384918,26472653,	ENSG00000255750.1	gene_id "ENSG00000255750.1"; transcript_id "ENST00000540625.1"; gene_type "antisense"; gene_status "NOVEL"; gene_name "RP11-283G6.5"; transcript_type "antisense"; transcript_status "KNOWN"; transcript_name "RP11-283G6.5-003"; level 2; tag "basic"; havana_gene "OTTHUMG00000169177.1"; havana_transcript "OTTHUMT00000402726.1";	ENST00000540625.1		Antisense	ENSEMBL	483
p34877_v4	0.346721	0.013681	2.5245	up	3.40879	3.84134	3.21408	5.15285	5.00494	4.31441	0	CTCTTGGGAGTAGAAAAGGAAGTGGTCAAGGTCGACCTGCAAAGCATTTCTCGCCTGCTC	ENST00000416260.1	20	-	34064198	34078745	3	34064198,34065650,34078681,	34064500,34065770,34078745,	ENSG00000230155.2	gene_id "ENSG00000230155.2"; transcript_id "ENST00000416260.1"; gene_type "antisense"; gene_status "NOVEL"; gene_name "RP3-477O4.14"; transcript_type "antisense"; transcript_status "KNOWN"; transcript_name "RP3-477O4.14-001"; level 2; tag "basic"; havana_gene "OTTHUMG00000055986.3"; havana_transcript "OTTHUMT00000125988.1";	ENST00000416260.1		Antisense	ENSEMBL	486
p13406	0.346721	0.0144773	2.42519	up	7.03666	7.36738	6.94641	8.38518	8.88756	7.91202	0	GCATCAGACCGTATTTCTATGTATTCAATATCTGACACAGGAAGAAGAATATTTTAGAGG	ENST00000417516.1	5	-	131973741	131991584	2	131973741,131991410,	131973957,131991584,	ENSG00000223442.1	gene_id "ENSG00000223442.1"; transcript_id "ENST00000417516.1"; gene_type "antisense"; gene_status "NOVEL"; gene_name "AC004041.2"; transcript_type "antisense"; transcript_status "KNOWN"; transcript_name "AC004041.2-002"; level 2; tag "basic"; havana_gene "OTTHUMG00000059612.2"; havana_transcript "OTTHUMT00000132779.1";	ENST00000417516.1		Antisense	ENSEMBL	390
p12706	0.346721	0.00213568	2.37723	up	3.20647	3.52001	3.6257	4.83175	4.81764	4.45062	0	AATATTGACAAGCTAATGAGAGAACTTTGAGGTAAGCTGATATGCAGGTATAGTTAGGAC	ENST00000503051.1	4	+	53525572	53527835	2	53525572,53527058,	53525843,53527835,	ENSG00000248866.1	gene_id "ENSG00000248866.1"; transcript_id "ENST00000503051.1"; gene_type "antisense"; gene_status "NOVEL"; gene_name "USP46-AS1"; transcript_type "antisense"; transcript_status "KNOWN"; transcript_name "USP46-AS1-001"; level 2; tag "basic"; havana_gene "OTTHUMG00000160639.1"; havana_transcript "OTTHUMT00000361515.1";	ENST00000503051.1	USP46-AS1	Antisense	ENSEMBL	1048
p9551	0.346721	0.0165821	2.02067	up	4.71052	5.16341	4.861	5.92441	6.30585	5.54917	0	AGTGGTTTGGCTGCAATGTAGAAACTACAGTATGAAGTGTTTTATGTCTGCATTGTCTTA	ENST00000587099.1	2	-	223181960	223183372	1	223181960,	223183372,	ENSG00000267034.1	gene_id "ENSG00000267034.1"; transcript_id "ENST00000587099.1"; gene_type "lincRNA"; gene_status "NOVEL"; gene_name "RP11-384O8.1"; transcript_type "lincRNA"; transcript_status "KNOWN"; transcript_name "RP11-384O8.1-001"; level 2; tag "basic"; havana_gene "OTTHUMG00000180633.1"; havana_transcript "OTTHUMT00000452291.1";	ASO2149;asoverlaps_619_1423		Intergenic	ENSEMBL	1412
p20123	0.353608	0.0452643	3.61658	up	3.3349	2.92156	4.27942	5.74199	5.99051	4.36727	0	GAAAATGCTTAAGTATTACAACTGGTAAATCATAAGAGTTATGGTTGATGTGGCTCCCAG	TCONS_00025536	17	-	5142427	5145921	3	5142427,5144098,5144294,	5144015,5144213,5145921,	XLOC_012366	Gene_id=XLOC_012366;Gene_name=linc-C17orf87-1;Transcript_id=TCONS_00025536;Transcript_name=linc-C17orf87-1;	XLOC_012366		Intergenic	HumanLincRNACatalog	3330
p2532	0.346721	0.0168637	2.28209	up	5.49875	5.32771	5.29562	6.73338	6.96931	5.99044	0	AAGGTGAGTGCTTCCAAAGAGCCTGTTTGGATTGTCATAGAGGATGCCTAAAGAGCATGT	ENST00000525787.1	11	-	118898521	118900374	2	118898521,118899931,	118899136,118900374,	ENSG00000137700.11	gene_id "ENSG00000137700.11"; transcript_id "ENST00000525787.1"; gene_type "processed_transcript"; gene_status "KNOWN"; gene_name "SLC37A4"; transcript_type "retained_intron"; transcript_status "KNOWN"; transcript_name "SLC37A4-014"; level 2; havana_gene "OTTHUMG00000166352.2"; havana_transcript "OTTHUMT00000389673.1";	ENST00000525787.1	SLC37A4	Antisense	ENSEMBL	1058
p2812	0.346721	0.00891834	2.92058	up	5.16096	5.05355	5.58547	7.25866	6.88786	6.29221	0	CAAAGTACCTGCAAGTAACACTGCTTACTCTTGCTGTTTGCCTCATCTGACTGGAAACCT	ENST00000526897.1	11	+	67819559	67821161	3	67819559,67820446,67820825,	67819908,67820552,67821161,	ENSG00000255031.1	gene_id "ENSG00000255031.1"; transcript_id "ENST00000526897.1"; gene_type "processed_transcript"; gene_status "PUTATIVE"; gene_name "RP11-802E16.3"; transcript_type "processed_transcript"; transcript_status "PUTATIVE"; transcript_name "RP11-802E16.3-002"; level 1; tag "basic"; tag "exp_conf"; havana_gene "OTTHUMG00000167383.2"; havana_transcript "OTTHUMT00000394449.1";	ENST00000526897.1		Antisense	ENSEMBL	791
p332	0.34911	0.030788	2.10905	up	3.2862	3.46109	3.81894	4.10614	5.10855	4.58131	0	GCCGATGGCATCTCCATTCCCCTAGCTGGACTGGTTGACCAGGCTCAGCTAAAGATTCTG	ENST00000430098.1	1	-	110708807	110709805	2	110708807,110709452,	110708936,110709805,	ENSG00000227091.1	gene_id "ENSG00000227091.1"; transcript_id "ENST00000430098.1"; gene_type "antisense"; gene_status "PUTATIVE"; gene_name "RP5-1028L10.1"; transcript_type "antisense"; transcript_status "PUTATIVE"; transcript_name "RP5-1028L10.1-001"; level 2; tag "basic"; havana_gene "OTTHUMG00000011762.1"; havana_transcript "OTTHUMT00000032552.1";	ENST00000430098.1		Antisense	ENSEMBL	482
p7856	0.34911	0.0292658	2.30734	up	4.51703	4.24002	4.54703	5.9957	5.98506	4.94202	0	AACATCGTGGCTGAATGAACAGCTGGGACTATGCTTAACCCATTCCCAGCTTATAAAAGC	ENST00000573177.1	18	+	3602997	3604385	1	3602997,	3604385,	ENSG00000262001.1	gene_id "ENSG00000262001.1"; transcript_id "ENST00000573177.1"; gene_type "antisense"; gene_status "NOVEL"; gene_name "DLGAP1-AS2"; transcript_type "antisense"; transcript_status "KNOWN"; transcript_name "DLGAP1-AS2-003"; level 2; tag "basic"; havana_gene "OTTHUMG00000177864.1"; havana_transcript "OTTHUMT00000439286.1";	ENST00000573177.1	DLGAP1-AS2	Antisense	ENSEMBL	1388
RNA144460|snRNA_413_133	0.353129	0.0445799	2.461	up	4.09525	3.83957	3.05223	5.22553	5.33828	4.32099	0	TAAAGGAACTAAGAATTCATTAAGAATTAATAACATTAACATTAACTTAATGTTAACATT	RNA144460|snRNA_413_133													ftp://ftp.ensembl.org/pub/current/fasta/homo_sapiens/ncrna/Homo_sapiens.GRCh37.61.ncrna.fa.gz	NA
p23866	0.350581	0.0381639	6.07332	up	3.00625	4.55912	5.83987	7.50938	7.02977	6.67354	0	GCTAGCACAAATAATGATGCTTCTATGACAAATTTTCTTTTAGCTACAATGTCTGCTGGT	TCONS_00012852	7	+	141870969	141921088	24	141870969,141871897,141872451,141873028,141875451,141883065,141884876,141885788,141887549,141889166,141895953,141896364,141896499,141897199,141897443,141897938,141898414,141899679,141908019,141908372,141918160,141919669,141920097,141920363,	141871240,141871994,141872564,141873154,141875580,141883173,141884939,141885923,141887634,141889305,141896087,141896399,141896616,141897348,141897528,141897995,141898539,141899768,141908106,141908422,141918331,141919974,141920240,141921088,	XLOC_006277	Gene_id=XLOC_006277;Gene_name=linc-MTRNR2L6-3;Transcript_id=TCONS_00012852;Transcript_name=linc-MTRNR2L6-3;	XLOC_006277		Intergenic	HumanLincRNACatalog	3538
p6972	0.346721	0.0116734	2.51977	up	3.93557	4.05329	3.4572	5.52453	5.22449	4.69692	0	TGGATTCTGGGAACAATTTATATTAAAAAGCTGTAAGCTCCTCATGCCTTAAAGCTGTAA	ENST00000582889.1	17	-	61194379	61208308	4	61194379,61198049,61202468,61208224,	61194555,61198167,61202568,61208308,	ENSG00000264513.1	gene_id "ENSG00000264513.1"; transcript_id "ENST00000582889.1"; gene_type "antisense"; gene_status "NOVEL"; gene_name "RP11-556O9.2"; transcript_type "antisense"; transcript_status "KNOWN"; transcript_name "RP11-556O9.2-001"; level 2; tag "basic"; havana_gene "OTTHUMG00000179111.1"; havana_transcript "OTTHUMT00000444836.1";	ENST00000582889.1		Antisense	ENSEMBL	478
p22146	0.346745	0.0180891	2.2199	up	4.54838	4.33234	5.26855	6.00884	5.89883	5.69307	0	AGTCCAAAGGGTGGCTCGAGTAATTTTTTAACTGAGCACTTTTCTCTGCTTGCAGGCTGA	TCONS_00006203	3	+	126011602	126013479	2	126011602,126012875,	126011680,126013479,	XLOC_002798	Gene_id=XLOC_002798;Gene_name=linc-CCDC37-2;Transcript_id=TCONS_00006203;Transcript_name=linc-CCDC37-2;	XLOC_002798		Intergenic	HumanLincRNACatalog	682
p20116	0.348944	0.0273694	4.60391	up	1.95057	2.69047	2.93021	5.23423	5.3717	3.57391	0	CTATAATGCTTATACTACAGGATGGCCAATTCAGAACTTCTTACTAGTGCTGAATTCAAT	TCONS_00024914	16	+	89557725	89565673	2	89557725,89565217,	89557794,89565673,	XLOC_011834	Gene_id=XLOC_011834;Gene_name=linc-SPG7-1;Transcript_id=TCONS_00024914;Transcript_name=linc-SPG7-1;	XLOC_011834		Divergent	HumanLincRNACatalog	525
p28662	0.348944	0.0255332	2.02901	up	11.9376	12.7234	11.8136	13.1018	13.1108	13.3243	0	CTTGGATGAGCAGGGGATGAGAGCTGCAGGGAAATAAATGAGATATTCGTCCTTAAAAAA	ASO3926	None	None	None	None	None	None	None	ASO3926	Accession=M73792;Description=Human mRNA related to a calmodulin-like, processed pseudogene (302 bp identical to the 3' untranslated region).	asoverlaps_574_1538			RNAdb	1538
p29280	0.348944	0.026619	3.22482	up	6.43848	5.83952	5.8189	7.9695	8.34526	6.84979	0	TGTGTCCTTTTATTCATGAATTCTTGCACATTATGAAGAAAGAGTCCATGTGGTCAGTGT	ENST00000562038.1	2	+	217081767	217084915	1	217081767,	217084915,	ENSG00000260804.2	gene_id "ENSG00000260804.2"; transcript_id "ENST00000562038.1"; gene_type "lincRNA"; gene_status "NOVEL"; gene_name "RP11-566E18.3"; transcript_type "lincRNA"; transcript_status "KNOWN"; transcript_name "RP11-566E18.3-001"; level 2; tag "basic"; havana_gene "OTTHUMG00000176293.1"; havana_transcript "OTTHUMT00000431729.1";	ENST00000562038.1		Intergenic	ENSEMBL	3148
p26199	0.348681	0.02086	2.51618	up	5.9737	5.39455	5.38271	7.09432	7.32552	6.32482	0	CTTACTACACTGTATCCTCCATTTGAATGTTGTCAAGAGCTCTTCTCACAATTGTAAATA	uc003brr.4	3	-	9431589	9439174	2	9431589,9439107,	9433510,9439174,	LOC440944	proteinID=;alignID=uc003brr.4;kgID=uc003brr.4;mRNA=AK093640;spID=;refseq=;protAcc=;description=Homo sapiens uncharacterized LOC440944 (LOC440944), non-coding RNA.;rfamAcc=;tRnaName=;	uc003brr.4		Divergent	UCSC	1988
p13700	0.348944	0.0268015	4.79108	up	2.10915	2.57751	2.87138	4.99677	5.73323	3.60909	0	GCATGCCGGATGCCTTTTATTGCTTCCATCTGTTTAAAGATAATGAAAATAAGAAATTGG	ENST00000514241.1	5	+	65958158	65958816	1	65958158,	65958816,	ENSG00000249057.1	gene_id "ENSG00000249057.1"; transcript_id "ENST00000514241.1"; gene_type "sense_intronic"; gene_status "NOVEL"; gene_name "MAST4-IT1"; transcript_type "sense_intronic"; transcript_status "KNOWN"; transcript_name "MAST4-IT1-001"; level 2; tag "basic"; havana_gene "OTTHUMG00000162486.1"; havana_transcript "OTTHUMT00000369119.1";	ENST00000514241.1	MAST4-IT1	Sense	ENSEMBL	658
p29035	0.346721	0.0100784	2.12977	up	7.07009	7.55633	6.89194	8.37476	8.41173	8.00396	0	TTAGGAGGAAACCATTGGCTTCTGGTTAGAGTTCTAAGAAGGGAAACTGGCGTGTGAGTA	ENST00000526585.1	11	-	76493673	76494103	2	76493673,76494034,	76493900,76494103,	ENSG00000255100.1	gene_id "ENSG00000255100.1"; transcript_id "ENST00000526585.1"; gene_type "antisense"; gene_status "NOVEL"; gene_name "RP11-21L23.3"; transcript_type "antisense"; transcript_status "KNOWN"; transcript_name "RP11-21L23.3-002"; level 2; tag "basic"; havana_gene "OTTHUMG00000165239.1"; havana_transcript "OTTHUMT00000382873.1";	ENST00000526585.1		Antisense	ENSEMBL	296
p6973	0.346924	0.0192047	2.16279	up	5.66277	4.90794	4.99399	6.43725	6.50419	5.96194	0	CCTGTTCAGCATCACCTGTAACAAGAAGGCATTGAAGAACATGAATCTTTCAAAATAAAA	ENST00000435892.1	17	-	61271290	61275146	2	61271290,61274982,	61271431,61275146,	ENSG00000233635.2	gene_id "ENSG00000233635.2"; transcript_id "ENST00000435892.1"; gene_type "antisense"; gene_status "NOVEL"; gene_name "AC037445.1"; transcript_type "antisense"; transcript_status "KNOWN"; transcript_name "AC037445.1-001"; level 2; tag "basic"; havana_gene "OTTHUMG00000132317.2"; havana_transcript "OTTHUMT00000255430.1";	ENST00000435892.1		Antisense	ENSEMBL	305
p14054	0.351166	0.041002	2.65135	up	4.85444	4.93061	4.51309	6.30857	6.88472	5.32502	0	TTTCCCTTCTCAGGACATACACAGGACTGGGAGAAAATAGACTAAGTATTTGATATTACA	ENST00000514793.1	5	+	179085236	179091433	3	179085236,179089975,179091323,	179085482,179090104,179091433,	ENSG00000250999.1	gene_id "ENSG00000250999.1"; transcript_id "ENST00000514793.1"; gene_type "antisense"; gene_status "NOVEL"; gene_name "RP11-1379J22.5"; transcript_type "antisense"; transcript_status "KNOWN"; transcript_name "RP11-1379J22.5-002"; level 2; tag "basic"; havana_gene "OTTHUMG00000163211.2"; havana_transcript "OTTHUMT00000372146.1";	TCONS_00009559;XLOC_004677;TCONS_00009560;XLOC_004677;TCONS_00009561;XLOC_004677		Antisense	ENSEMBL	485
p17487	0.348733	0.0213529	2.5042	up	5.24834	5.06134	5.14449	6.46876	7.09681	5.86165	0	TACTAATTTGTCAAGGAGCTAGAGCTCCTAAACACGCCATCTTGAATTCTTCCCTGCGAC	TCONS_00001662	1	-	146644429	146645134	2	146644429,146644551,	146644450,146645134,	XLOC_001002	Gene_id=XLOC_001002;Gene_name=linc-PRKAB2-2;Transcript_id=TCONS_00001662;Transcript_name=linc-PRKAB2-2;	XLOC_001002		Divergent	HumanLincRNACatalog	604
RNA33614|snoRNA_scaRNA_210_84	0.346721	0.00444528	3.69615	up	2.99999	3.39898	3.38627	5.73061	4.97046	4.74225	0	ACAAAATCTTGATTTAAGTGAATGAAAAATTACAAGATCCAACTCTGATTTCAGCCAGAG	RNA33614|snoRNA_scaRNA_210_84													ftp://ftp.ensembl.org/pub/current/fasta/homo_sapiens/ncrna/Homo_sapiens.GRCh37.61.ncrna.fa.gz	NA
p5280	0.348733	0.021335	2.54463	up	4.17499	3.64305	3.07527	5.06276	5.24627	4.62665	0	AGAAGTAAAAAGATTTGCCCAAAGTAGCACACAAATTCAATTTCTATGGGTCCTATATGG	ENST00000560094.1	15	-	78772398	78774162	2	78772398,78774041,	78772602,78774162,	ENSG00000259474.1	gene_id "ENSG00000259474.1"; transcript_id "ENST00000560094.1"; gene_type "antisense"; gene_status "NOVEL"; gene_name "RP11-650L12.1"; transcript_type "antisense"; transcript_status "KNOWN"; transcript_name "RP11-650L12.1-001"; level 2; tag "basic"; havana_gene "OTTHUMG00000172564.1"; havana_transcript "OTTHUMT00000419129.1";	ENST00000560094.1		Antisense	ENSEMBL	325
p542	0.346721	0.0152409	2.15144	up	10.792	10.5211	10.0083	11.6251	11.7476	11.2647	0	ACTACACTGTGTGGAGCAAGTTTTAAAGAAGCAAAGGTATAGCAGTTCCAAGTATTTTTT	ENST00000416952.1	1	-	173834305	173837126	6	173834305,173834994,173835314,173835665,173836128,173837097,	173834685,173835032,173835344,173835934,173836181,173837126,	ENSG00000234741.2	gene_id "ENSG00000234741.2"; transcript_id "ENST00000416952.1"; gene_type "processed_transcript"; gene_status "KNOWN"; gene_name "GAS5"; transcript_type "retained_intron"; transcript_status "KNOWN"; transcript_name "GAS5-012"; level 2; havana_gene "OTTHUMG00000037216.2"; havana_transcript "OTTHUMT00000090588.1";	ENST00000416952.1	GAS5	Divergent	ENSEMBL	799
p4706	0.351397	0.042267	2.12586	up	7.33858	7.51423	7.11889	8.77882	8.74802	7.70899	0	CAAAACAAAACAAAAAGCTCGAAGATGCCTGCTGACAAGGACTCCCTCCTGTTTCTACCA	ENST00000552675.1	14	-	105934129	105936954	2	105934129,105936651,	105934271,105936954,	ENSG00000257270.1	gene_id "ENSG00000257270.1"; transcript_id "ENST00000552675.1"; gene_type "antisense"; gene_status "NOVEL"; gene_name "RP11-521B24.5"; transcript_type "antisense"; transcript_status "KNOWN"; transcript_name "RP11-521B24.5-001"; level 2; tag "basic"; havana_gene "OTTHUMG00000170425.1"; havana_transcript "OTTHUMT00000409073.1";	ENST00000552675.1		Antisense	ENSEMBL	445
p26415	0.346721	0.00978289	2.40806	up	5.09344	5.46121	5.23342	6.67701	6.87459	6.04008	0	CCCCTCCTCCAACAAAACAGATTCTGTGGAAAACATTTTTTGTTGTATTGCTAGGTTTTA	uc003wmd.1	7	-	155434167	155437113	1	155434167,	155437113,	AX747269	proteinID=;alignID=uc003wmd.1;kgID=uc003wmd.1;mRNA=AX747269;spID=;refseq=;protAcc=;description=Homo sapiens cDNA FLJ34623 fis, clone KIDNE2015073.;rfamAcc=;tRnaName=;	UCSC_2342_2946		Divergent	UCSC	2946
p10154	0.350435	0.0348814	3.11407	up	7.73839	7.57291	6.73924	8.15608	9.30237	9.50849	0	TATCAGTTGCTCGTCTCTCCACAACATAGTTTGTGATCTTAGATCCACCATCATCGCGTG	ENST00000589234.1	2	+	179455884	179479002	5	179455884,179462322,179464320,179465284,179478761,	179456041,179462408,179464477,179465394,179479002,	ENSG00000237298.2	gene_id "ENSG00000237298.2"; transcript_id "ENST00000589234.1"; gene_type "antisense"; gene_status "NOVEL"; gene_name "TTN-AS1"; transcript_type "antisense"; transcript_status "KNOWN"; transcript_name "TTN-AS1-035"; level 2; tag "RNA_Seq_supported_only"; tag "basic"; havana_gene "OTTHUMG00000133536.5"; havana_transcript "OTTHUMT00000458925.1";	ENST00000589234.1	TTN-AS1	Antisense	ENSEMBL	751
p5528	0.346721	0.00339586	3.50597	up	3.08035	3.44093	3.29419	5.45088	5.24145	4.55258	0	CTGCATTTCCCCTCCATTCTTGAAGCCAATCTTTTTCAAGAAATGACTAAGCAGCACCTG	ENST00000501665.1	15	+	41576229	41601901	5	41576229,41577422,41578208,41600764,41600917,	41576308,41577561,41578298,41600822,41601901,	ENSG00000247556.2	gene_id "ENSG00000247556.2"; transcript_id "ENST00000501665.1"; gene_type "processed_transcript"; gene_status "NOVEL"; gene_name "OIP5-AS1"; transcript_type "lincRNA"; transcript_status "KNOWN"; transcript_name "OIP5-AS1-003"; level 2; havana_gene "OTTHUMG00000172547.2"; havana_transcript "OTTHUMT00000419059.1";	ENST00000501665;TCONS_00023384;XLOC_011226	OIP5-AS1	Intergenic	ENSEMBL	1350
p13419	0.346721	0.0171849	2.60945	up	5.73976	5.28466	5.57329	6.30636	7.42363	7.01896	0	TTGAACTGTTCTTCCATTTAGATACCATGACACATCAGGAGCTGGCAGTCCACTCACCTA	ENST00000508281.1	5	-	137219063	137225025	3	137219063,137223848,137224835,	137219310,137223977,137225025,	ENSG00000250159.1	gene_id "ENSG00000250159.1"; transcript_id "ENST00000508281.1"; gene_type "antisense"; gene_status "NOVEL"; gene_name "RP11-381K20.2"; transcript_type "antisense"; transcript_status "KNOWN"; transcript_name "RP11-381K20.2-002"; level 2; tag "basic"; havana_gene "OTTHUMG00000163307.1"; havana_transcript "OTTHUMT00000372530.1";	ENST00000508281.1		Antisense	ENSEMBL	566
p14611	0.346721	0.0109054	3.67843	up	5.30609	5.14476	4.70857	7.06521	7.5112	6.22028	0	ACATTTGCATATTTAGCCGCCAAGTTGGATAAAAATCCAAATCAGGTAACTACCCAATTT	ENST00000551025.1	6	+	90539649	90581122	9	90539649,90556280,90562884,90564535,90565188,90566802,90571844,90575671,90581007,	90541058,90556363,90562953,90564636,90565263,90566918,90574090,90578801,90581122,	ENSG00000118412.8	gene_id "ENSG00000118412.8"; transcript_id "ENST00000551025.1"; gene_type "processed_transcript"; gene_status "KNOWN"; gene_name "CASP8AP2"; transcript_type "processed_transcript"; transcript_status "KNOWN"; transcript_name "CASP8AP2-202"; level 3; tag "basic"; havana_gene "OTTHUMG00000015212.5";	ENST00000551025.1	CASP8AP2	Antisense	ENSEMBL	7344
p28388	0.351166	0.0414376	2.10501	up	8.14396	7.53516	7.34918	8.70656	9.24047	8.30273	0	AATGAAACAGGATCTTGTCCATGGATTTTCATTAGTTCCTGTATGGCCTGTATTTAATAG	ASO2093	None	None	None	None	None	None	None	ASO2093	Accession=BC037797;Description=Homo sapiens chromosome 14 open reading frame 10, mRNA (cDNA clone IMAGE:4794562).	asoverlaps_339_2044		Antisense	RNAdb	2044
p18522	0.350496	0.0354629	2.9658	up	3.60773	3.90179	4.06373	6.06112	5.74227	4.47513	0	AGGCAATCACATCTCTATCAGTGGAATTGTAGACTAAATGCATGAGCAAAACTAGCTTTT	TCONS_00019977	11	+	94464168	94475371	3	94464168,94474103,94475086,	94464322,94474154,94475371,	XLOC_009254	Gene_id=XLOC_009254;Gene_name=linc-AMOTL1-1;Transcript_id=TCONS_00019977;Transcript_name=linc-AMOTL1-1;	XLOC_009254		Intergenic	HumanLincRNACatalog	490
p34840_v4	0.346721	0.0118347	2.08857	down	11.8649	11.3195	11.8831	10.4907	10.4501	10.9391	0	AGTGAGGACACAGCCAAACCGTATCAGCATGCCCAAATTGGATCTCAGCGCCTGGGAGCT	ENST00000585625.1	2	+	179385909	179396305	4	179385909,179386519,179388178,179396040,	179386028,179386895,179388363,179396305,	ENSG00000237298.2	gene_id "ENSG00000237298.2"; transcript_id "ENST00000585625.1"; gene_type "antisense"; gene_status "NOVEL"; gene_name "TTN-AS1"; transcript_type "antisense"; transcript_status "KNOWN"; transcript_name "TTN-AS1-038"; level 2; tag "RNA_Seq_supported_only"; tag "basic"; havana_gene "OTTHUMG00000133536.5"; havana_transcript "OTTHUMT00000458894.1";	ENST00000585625.1	TTN-AS1	Antisense	ENSEMBL	945
p27765	0.34911	0.0306052	2.16072	down	5.59595	5.52351	5.69184	3.9766	4.37763	5.12253	0	CAGCTATAAATACAAGCGAAAAGCTTACCGAGTGCAATAAAATACAGACACGCTTTTTTA	uc.261-	9	-	81871573	81871884	1	81871573,	81871884,	uc.261-	uc.261-	uc.261-		Intergenic	UCR	311
p27109	0.346721	0.0100375	3.87408	down	5.82578	5.70514	4.8398	3.30461	3.13041	4.07414	0	CAGATGCATTTAATCACTCTTCTGTGAGCTCATTTGGAAACACCTGAAGATGTCGAGTGC	uc.323-	11	-	16475335	16475535	1	16475335,	16475535,	uc.323-	uc.323-	uc.323-		Intronic	UCR	200
p9966	0.34911	0.0299587	2.50171	down	6.95944	5.86219	6.13113	5.27316	4.54374	5.16713	0	TTCTGATTGCCCAAGCCCTCCTTGTCTTGCTTGGATTATCTCCACACAAATGGAGAAACT	ENST00000555766.1	2	+	113995110	113997485	2	113995110,113996665,	113995789,113997485,	ENSG00000189223.8	gene_id "ENSG00000189223.8"; transcript_id "ENST00000555766.1"; gene_type "processed_transcript"; gene_status "NOVEL"; gene_name "AC016683.6"; transcript_type "retained_intron"; transcript_status "KNOWN"; transcript_name "AC016683.6-010"; level 2; havana_gene "OTTHUMG00000153340.3"; havana_transcript "OTTHUMT00000411449.1";	ENST00000555766.1		Intronic	ENSEMBL	1499
p7360	0.354588	0.0485952	2.26618	down	4.94319	5.44158	4.03315	3.47327	3.76458	3.63928	0	GGTTGGGGAATGAGCTTCTCTCATAGAGAACAAAATAAACACAATCAAACATTTGGAAAA	ENST00000430006.1	17	+	39558667	39568840	3	39558667,39564672,39568670,	39558760,39566569,39568840,	ENSG00000234859.1	gene_id "ENSG00000234859.1"; transcript_id "ENST00000430006.1"; gene_type "antisense"; gene_status "NOVEL"; gene_name "AC003958.2"; transcript_type "antisense"; transcript_status "KNOWN"; transcript_name "AC003958.2-001"; level 2; tag "basic"; havana_gene "OTTHUMG00000133598.3"; havana_transcript "OTTHUMT00000257706.2";	ENST00000430006.1		Antisense	ENSEMBL	2160
p27499	0.348733	0.0217129	2.17472	down	4.82851	5.04054	4.45622	3.26008	3.57138	4.13132	0	CTGCATAAACTCTTTCTGCAATTCAAATGTTGACACCCAAAATTACAAGCCAGAATGCTT	uc.116-	3	-	70566423	70566629	1	70566423,	70566629,	uc.116-	uc.116-	uc.116-		Intergenic	UCR	206
p10476	0.349241	0.0334661	2.42202	down	6.53763	6.47338	5.80639	4.37842	5.12549	5.48485	0	ATTTGTGACAGGCTCTCTAAATTGAATCCCCTTAGGCTATTAACTGAAAGGAGCATGGTG	ENST00000433766.1	20	-	54036873	54043735	3	54036873,54040014,54043606,	54038900,54040148,54043735,	ENSG00000224008.1	gene_id "ENSG00000224008.1"; transcript_id "ENST00000433766.1"; gene_type "lincRNA"; gene_status "NOVEL"; gene_name "RP5-1010E17.2"; transcript_type "lincRNA"; transcript_status "KNOWN"; transcript_name "RP5-1010E17.2-001"; level 2; tag "basic"; havana_gene "OTTHUMG00000134311.1"; havana_transcript "OTTHUMT00000259284.1";	ENCODE_186_2290;TCONS_00028069;XLOC_013804		Intergenic	ENSEMBL	2290
p10938	0.346721	0.0165416	2.58065	down	3.18289	4.28785	3.42381	2.39133	2.27948	2.12053	0	CTAGAGATTTCATCACAACGTCGTGTTAATTTAGAAGATGAGACACGAAGTTCAAAAAAG	ENST00000338526.6	22	-	17154450	17160374	5	17154450,17154713,17155996,17158082,17160181,	17154627,17154715,17156936,17158266,17160374,	ENSG00000189295.8	gene_id "ENSG00000189295.8"; transcript_id "ENST00000338526.6"; gene_type "lincRNA"; gene_status "NOVEL"; gene_name "ANKRD62P1-PARP4P3"; transcript_type "lincRNA"; transcript_status "KNOWN"; transcript_name "ANKRD62P1-PARP4P3-201"; level 3; tag "basic"; havana_gene "OTTHUMG00000172533.1";	ENST00000338526.6	ANKRD62P1-PARP4P3	Intergenic	ENSEMBL	1496
p20035	0.34911	0.0302183	2.01908	down	4.42301	5.32994	5.21484	3.74459	4.05931	4.12282	0	CAAAGGAGACAAACTGACAGCAGAGCATTTTATTTAGACAAAAGAAATATATTCAGCCTG	TCONS_00024413	16	+	52305431	52314661	4	52305431,52306976,52313520,52313927,	52305782,52307131,52313602,52314661,	XLOC_011724	Gene_id=XLOC_011724;Gene_name=linc-CHD9-4;Transcript_id=TCONS_00024413;Transcript_name=linc-CHD9-4;	XLOC_011724		Intergenic	HumanLincRNACatalog	1322
p27274	0.346721	0.0135178	2.97179	down	5.30453	5.31962	4.86825	3.32154	3.18458	4.27228	0	GGCAACAAGATTAAATGCAAGGCATTTACATAATCATTAGTCGTGAGGTGTAGAAAAGAT	uc.405+	16	+	59575394	59575604	1	59575394,	59575604,	uc.405+	uc.405+	UCRs_394_210		Intergenic	UCR	210
p2684	0.352697	0.0438433	2.4759	down	6.07353	5.69024	5.50005	3.71631	4.46216	5.16149	0	TGAAAGGACACAGAAAAATATTTAGGACAATTAAAGCAAGCTACCATTCTAGACATAGGG	ENST00000534068.1	11	+	23752133	23818516	4	23752133,23753145,23816368,23818253,	23752432,23753204,23816430,23818516,	ENSG00000255193.1	gene_id "ENSG00000255193.1"; transcript_id "ENST00000534068.1"; gene_type "lincRNA"; gene_status "NOVEL"; gene_name "RP11-945A11.1"; transcript_type "lincRNA"; transcript_status "KNOWN"; transcript_name "RP11-945A11.1-001"; level 2; tag "basic"; havana_gene "OTTHUMG00000166086.1"; havana_transcript "OTTHUMT00000387785.1";	ENST00000534068.1		Intergenic	ENSEMBL	683
p24628	0.348944	0.0263146	2.43217	down	7.92942	7.85015	8.15628	6.48856	6.20078	7.39977	0	ATATCTGGTGGCAATTGGGGAAACTTCTGAGAAAGTAAGACAGACATGGATGTTGGGGTG	TCONS_00017335	X	-	71000376	71004546	2	71000376,71004122,	71000603,71004546,	XLOC_008182	Gene_id=XLOC_008182;Gene_name=linc-CXorf49B-2;Transcript_id=TCONS_00017335;Transcript_name=linc-CXorf49B-2;	XLOC_008182		Intergenic	HumanLincRNACatalog	651
p23195	0.354729	0.049423	2.01787	down	7.56099	7.50085	7.7726	6.40171	6.10844	7.28577	0	GAGAGGAGCAGAAACCAATACGGATCAACATTCCCTACTGATACAATTGATTCATTTTCC	TCONS_00012134	6	-	28756564	28757297	2	28756564,28757261,	28756777,28757297,	XLOC_005664	Gene_id=XLOC_005664;Gene_name=linc-SCAND3-2;Transcript_id=TCONS_00012134;Transcript_name=linc-SCAND3-2;	XLOC_005664		Intergenic	HumanLincRNACatalog	249
p29353	0.350581	0.0368294	2.38395	down	5.1118	5.66072	4.37018	4.03044	3.86197	3.49023	0	GCCGGGCCAAACTCTATCACAGCATAAATAATCTTTTCCTTAAATAAATACAGGTAAAAG	ENST00000432368.2	3	+	24535577	24541833	2	24535577,24541022,	24535982,24541833,	ENSG00000228791.2	gene_id "ENSG00000228791.2"; transcript_id "ENST00000432368.2"; gene_type "lincRNA"; gene_status "NOVEL"; gene_name "THRB-AS1"; transcript_type "lincRNA"; transcript_status "KNOWN"; transcript_name "THRB-AS1-001"; level 2; tag "basic"; havana_gene "OTTHUMG00000155683.2"; havana_transcript "OTTHUMT00000341251.2";	ENST00000432368.2	THRB-AS1	Intergenic	ENSEMBL	1216
p13094	0.346721	0.0057486	2.09834	down	3.76661	3.36208	3.37037	2.15125	2.64975	2.49032	0	AGAATTGGCATAATGAGACAAAAGAGTCCACTGTGGGAAATTTTTGCTTATGCAATGAAA	ENST00000502680.1	5	-	15112485	15117116	3	15112485,15116247,15117012,	15113077,15116373,15117116,	ENSG00000249332.1	gene_id "ENSG00000249332.1"; transcript_id "ENST00000502680.1"; gene_type "lincRNA"; gene_status "NOVEL"; gene_name "RP1-251I12.1"; transcript_type "lincRNA"; transcript_status "KNOWN"; transcript_name "RP1-251I12.1-001"; level 2; tag "basic"; havana_gene "OTTHUMG00000161792.1"; havana_transcript "OTTHUMT00000366110.1";	TCONS_00009608;XLOC_004739		Intergenic	ENSEMBL	822
p15577	0.350581	0.0356794	2.13905	down	5.77367	5.85522	5.15352	4.04792	4.4511	4.99248	0	TTATGCAAAGAGGTACCGGGGACAAGAAACTATAAGATAAGATCCCCCAGAGTGACACTG	ENST00000519814.1	8	-	8279933	8282142	2	8279933,8281997,	8280523,8282142,	ENSG00000253505.1	gene_id "ENSG00000253505.1"; transcript_id "ENST00000519814.1"; gene_type "lincRNA"; gene_status "NOVEL"; gene_name "CTA-398F10.1"; transcript_type "lincRNA"; transcript_status "KNOWN"; transcript_name "CTA-398F10.1-002"; level 2; tag "basic"; havana_gene "OTTHUMG00000163730.1"; havana_transcript "OTTHUMT00000375021.1";	ENST00000519814.1	CTA-398F10.1	Intergenic	ENSEMBL	735
RNA147213|p0317_imsncRNA698	0.354729	0.0493342	2.79534	down	4.92006	5.97042	5.95489	3.38214	4.25474	4.75942	0	GAAAATGGTATGAAATATTGGAAATAATGGAATCAAGCTGTAAGTTTTCACTGATTGGTA	RNA147213|p0317_imsncRNA698													unpublished data	NA
p14205	0.346721	0.00330306	2.4124	down	5.66533	5.6693	5.50114	4.58715	3.95648	4.48072	0	AATCTTACCTAGAGAGAGGCTGGTACCAACAACTAACCTTAAATAAATGTAAAACTAGAG	ENST00000434196.2	6	-	53910726	53912392	2	53910726,53912089,	53911957,53912392,	ENSG00000235050.2	gene_id "ENSG00000235050.2"; transcript_id "ENST00000434196.2"; gene_type "antisense"; gene_status "NOVEL"; gene_name "MLIP-AS1"; transcript_type "antisense"; transcript_status "KNOWN"; transcript_name "MLIP-AS1-001"; level 2; tag "basic"; havana_gene "OTTHUMG00000014889.3"; havana_transcript "OTTHUMT00000040977.3";	ENST00000434196.2	MLIP-AS1	Antisense	ENSEMBL	1534
p21242	0.346721	0.012908	3.18781	down	5.18302	4.88832	5.03558	2.91844	3.04741	4.12337	0	TAAAATTCTGGTTTCATACTTGGCCATTCCTGCTTAACGGAGCTAACAAAGAAATTTAAG	TCONS_00004917	2	+	151485398	151486228	2	151485398,151486153,	151485635,151486228,	XLOC_001707	Gene_id=XLOC_001707;Gene_name=linc-TNFAIP6-2;Transcript_id=TCONS_00004917;Transcript_name=linc-TNFAIP6-2;	XLOC_001707		Intergenic	HumanLincRNACatalog	312
p1182	0.353608	0.0459686	2.58021	down	6.94365	5.99552	6.89447	4.77467	4.99209	5.9644	0	CACCTTTAAGTTTTCTCAAAAGGAGGAGCATTAAGAATCAGCCACCTTAGTACATACTTA	ENST00000595668.1	1	+	147635155	147647206	2	147635155,147646527,	147635271,147647206,	ENSG00000232265.2	gene_id "ENSG00000232265.2"; transcript_id "ENST00000595668.1"; gene_type "lincRNA"; gene_status "NOVEL"; gene_name "XXyac-YX155B6.5"; transcript_type "lincRNA"; transcript_status "KNOWN"; transcript_name "XXyac-YX155B6.5-009"; level 2; tag "RNA_Seq_supported_only"; havana_gene "OTTHUMG00000043431.2"; havana_transcript "OTTHUMT00000461269.1";	ENST00000595668.1	XXyac-YX155B6.5	Intergenic	ENSEMBL	795
p21136	0.346721	0.0150811	2.38281	down	3.6979	3.7339	2.84257	2.25754	2.27965	1.97919	0	TAGAGTTCTGGTTCCTTCATAGGTACCTATTGTCCTAATAAATGGAATTCCTTGGAACAC	TCONS_00002911	2	+	65952619	65958034	3	65952619,65953723,65957632,	65952899,65953756,65958034,	XLOC_001504	Gene_id=XLOC_001504;Gene_name=linc-MEIS1-4;Transcript_id=TCONS_00002911;Transcript_name=linc-MEIS1-4;	XLOC_001504		Intergenic	HumanLincRNACatalog	715
p4027	0.348944	0.0236974	2.22256	down	10.7384	10.5828	9.85881	9.06056	9.06605	9.59673	0	ATTTCTGAAACATGCAGTTCTGAAGTCTGGCCAGCCACACCAAAGAGCTTTTCGCAAGAA	ENST00000432331.1	13	-	44680513	44711372	3	44680513,44681227,44711238,	44680593,44681353,44711372,	ENSG00000226519.1	gene_id "ENSG00000226519.1"; transcript_id "ENST00000432331.1"; gene_type "lincRNA"; gene_status "NOVEL"; gene_name "RP11-478K15.1"; transcript_type "lincRNA"; transcript_status "KNOWN"; transcript_name "RP11-478K15.1-001"; level 2; tag "basic"; havana_gene "OTTHUMG00000016828.1"; havana_transcript "OTTHUMT00000044730.1";	ENCODE_2664_340;TCONS_00021641;XLOC_010585		Intergenic	ENSEMBL	340
p27132	0.34911	0.0311386	2.94644	down	6.69961	6.75587	5.95247	5.09291	4.14027	5.49785	0	TGTTGTCACACTCATGCTGACAAAACAACTAGTTTGTAAAAGCACAGAGAGCTGTAGTGA	uc.331+	11	+	83195158	83195376	1	83195158,	83195376,	uc.331+	uc.331+	UCRs_350_218		Intronic	UCR	218
p40339_v4	0.34911	0.0281964	2.2219	down	5.03519	5.55146	5.96038	4.30122	4.76095	4.02948	0	ATGTATACATAAGCTGTGCGTATAGAATACATATGTATACATAAGCTGTGCGTATAGAAT	XR_241691.1	4	-	17460235	17461592	2	17460235,17461128,	17461060,17461592,	none					RefSeq	1289
p26588	0.353608	0.0467073	2.19371	down	4.91213	5.23579	4.95404	4.65047	3.37091	3.68048	0	GGAAGAAAACTCTATACTTCAATATTTTACTGCCCAAGTCACCAAAAAGCCTCTCATAAA	HIT000394655	1	-	166927295	167002722	2	166927295,167002494,	166927338,167002722,	HIX0028611	None	H-InvDB_2298_271		Antisense	H-InvDB	271
p27191	0.346721	0.00640274	2.05289	down	4.05889	4.10589	3.7989	2.63486	2.98004	3.23581	0	CAGCCGTGCAGTTCTATTTTACTAAAACACAAGATCAGAGACCCTTAGAACCAATTTTTT	uc.370-	14	-	34202570	34202963	1	34202570,	34202963,	uc.370-	uc.370-	uc.370-		Intronic	UCR	393
p16163	0.34911	0.0302606	2.58121	down	5.81686	5.34573	5.03494	3.38102	4.13884	4.57354	0	CAGCCTTGGTCTATTGTGTTGCCAAGAAATTGCCCTGCATCTGTTATAAATATAGAAATA	ENST00000522541.1	8	+	53106921	53112140	2	53106921,53111708,	53107313,53112140,	ENSG00000253551.1	gene_id "ENSG00000253551.1"; transcript_id "ENST00000522541.1"; gene_type "antisense"; gene_status "NOVEL"; gene_name "RP11-26M5.2"; transcript_type "antisense"; transcript_status "KNOWN"; transcript_name "RP11-26M5.2-001"; level 2; tag "basic"; havana_gene "OTTHUMG00000164251.1"; havana_transcript "OTTHUMT00000377942.1";	ENST00000522541.1		Antisense	ENSEMBL	824
p25524	0.348733	0.0215687	2.13316	down	5.62512	5.48693	6.23401	4.3903	4.63215	5.04463	0	GGATTTGAATTTAGCTTTTAAATTGGAATTTTTCAAAGACCACAACCCCAGCTGACAAAG	XR_171051.1	8	+	67025521	67038879	3	67025521,67026796,67038780,	67025831,67027014,67038879,	LOC101060153	ID=rna18749;Name=XR_171051.1;Parent=gene15852;Dbxref=GeneID:101060153,Genbank:XR_171051.1;gbkey=misc_RNA;product=uncharacterized LOC101060153;transcript_id=XR_171051.1|ID=gene15852;Name=LOC101060153;Dbxref=GeneID:101060153;gbkey=Gene;gene=LOC101060153	XR_171051.1		Divergent	RefSeq	627
p36606_v4	0.346721	0.0157295	2.86697	down	7.39217	6.71114	6.91547	5.26686	5.07892	6.1144	0	TGGCCAACCCTAAAGCCATCAAGATAGCAGGTCTGGCCTACAGAGAAGAGAGATCAGGGA	TCONS_00023311	15	+	24646606	24656639	3	24646606,24647110,24656594,	24646948,24647207,24656639,	XLOC_011180	Gene_id=XLOC_011180;Gene_name=linc-C15orf2-2;Transcript_id=TCONS_00023311;Transcript_name=linc-C15orf2-2;	XLOC_011180		Intergenic	HumanLincRNACatalog	484
p9008	0.351935	0.0428374	2.27175	down	5.23134	5.92248	5.14304	4.86643	3.79341	4.08561	0	ACTAAAGAAATGCAGAAGCAGGCAATCCTTGCAATAAGGCCAGCAAACTGCCAGTGTGAA	ENST00000453900.1	2	-	8811374	8815896	4	8811374,8811710,8813166,8815873,	8811407,8811902,8813437,8815896,	ENSG00000235092.1	gene_id "ENSG00000235092.1"; transcript_id "ENST00000453900.1"; gene_type "antisense"; gene_status "NOVEL"; gene_name "AC011747.7"; transcript_type "antisense"; transcript_status "KNOWN"; transcript_name "AC011747.7-003"; level 2; tag "basic"; havana_gene "OTTHUMG00000151625.1"; havana_transcript "OTTHUMT00000323319.1";	ENST00000453900.1		Antisense	ENSEMBL	519
p17966	0.348944	0.0227862	2.15648	down	5.49389	5.32102	4.52195	3.90077	4.1443	3.96578	0	TGCCCTCAGGAACTTATAGTAAGGGTGAGAAGATGTATGTAAAACTCTATCTGTTACCCC	TCONS_00017987	10	-	63541513	63581004	4	63541513,63541985,63554108,63580904,	63541597,63542163,63554223,63581004,	XLOC_008833	Gene_id=XLOC_008833;Gene_name=linc-TMEM26-1;Transcript_id=TCONS_00017987;Transcript_name=linc-TMEM26-1;	XLOC_008833		Intergenic	HumanLincRNACatalog	477
p36234_v4	0.351483	0.0423479	4.46011	down	12.4396	12.3992	12.3822	9.8546	9.22453	11.6706	0	CTGCAGGAAGCGTTTCGATGTCATGTGGAGGAGCCGCCGAGTGATTGATGGGCCCCAGCT	TCONS_00014976	8	-	37374022	37386629	4	37374022,37374320,37378825,37386614,	37374218,37374474,37378894,37386629,	XLOC_007054	Gene_id=XLOC_007054;Gene_name=linc-DUSP26-6;Transcript_id=TCONS_00014976;Transcript_name=linc-DUSP26-6;	XLOC_007054		Intergenic	HumanLincRNACatalog	434
p41436_v4	0.34911	0.0283074	2.10605	down	7.79446	7.1719	7.51131	6.91656	6.01619	6.32129	0	GTCAGCTCTATACAAACTAATGGAAGGATACAGCTATGCAAATATAGAACACTAAAGTGT	XR_242207.2	7	-	144034031	144052423	5	144034031,144040279,144047810,144051124,144052074,	144034070,144040391,144047917,144051253,144052423,	none					RefSeq	736
p16037	0.346721	0.0171549	2.08608	down	6.16586	6.632	6.2057	5.30286	4.86983	5.64848	0	TGAAAAATCAGAGTGTACTACAGAAGAAGACGACAGCGTTTGAGCACATTTGTTGAAGCA	ENST00000530150.1	8	+	12651751	12675800	2	12651751,12675471,	12651926,12675800,	ENSG00000255494.1	gene_id "ENSG00000255494.1"; transcript_id "ENST00000530150.1"; gene_type "lincRNA"; gene_status "NOVEL"; gene_name "LINC00681"; transcript_type "lincRNA"; transcript_status "KNOWN"; transcript_name "LINC00681-001"; level 2; tag "basic"; havana_gene "OTTHUMG00000129516.3"; havana_transcript "OTTHUMT00000384374.1";	ENST00000530150.1	LINC00681	Intergenic	ENSEMBL	504
p4761	0.346721	0.00151585	2.18474	down	5.72312	5.68247	5.55481	4.48115	4.31441	4.78247	0	TGGACAGATGAGGGAAGTCTGTGACAATCCAGTGGAATCACGCAGTGTGTTTAAGTAAAG	ENST00000548385.1	14	+	27286173	27305664	3	27286173,27296922,27305472,	27286252,27297009,27305664,	ENSG00000257185.1	gene_id "ENSG00000257185.1"; transcript_id "ENST00000548385.1"; gene_type "lincRNA"; gene_status "NOVEL"; gene_name "RP11-626P14.2"; transcript_type "lincRNA"; transcript_status "KNOWN"; transcript_name "RP11-626P14.2-002"; level 2; havana_gene "OTTHUMG00000170416.1"; havana_transcript "OTTHUMT00000409034.1";	ENST00000548385.1		Intergenic	ENSEMBL	358
p15606	0.346721	0.0101771	2.23913	down	5.28137	6.00285	5.22484	4.42311	4.29516	4.30197	0	GTTTTTTAAGTTGCAAAATAAAAGTTATCGCCTGTGGGCCCTGAAGGCCTCTTTTCCACT	ENST00000534827.1	8	-	12623357	12668987	5	12623357,12625238,12635762,12645840,12668888,	12624104,12625423,12635865,12645953,12668987,	ENSG00000254813.1	gene_id "ENSG00000254813.1"; transcript_id "ENST00000534827.1"; gene_type "lincRNA"; gene_status "NOVEL"; gene_name "RP11-252C15.1"; transcript_type "lincRNA"; transcript_status "KNOWN"; transcript_name "RP11-252C15.1-001"; level 2; tag "basic"; havana_gene "OTTHUMG00000165476.1"; havana_transcript "OTTHUMT00000384372.1";	TCONS_00014474;XLOC_007009		Intergenic	ENSEMBL	1247
p27418	0.346721	0.0101424	2.64148	down	5.40201	5.1555	4.77836	3.84478	3.2336	4.05346	0	GACAACCTGCCAAGAGTTTTGTGGCCTTGTAAACACAAAAGTGCTCTAATAAAATTTTAT	uc.109-	2	-	177503337	177503561	1	177503337,	177503561,	uc.109-	uc.109-	uc.109-		Intergenic	UCR	224
p24758	0.346721	0.00350997	2.0663	down	5.71569	6.06162	5.78975	5.06919	4.72717	4.62955	0	CTTGGTCTTCCACAAACAGGCTAGAAAAGTATGCTTACTTATCTTTAGCTTTATGCTTTT	XR_159043.1	1	-	61419414	61436309	4	61419414,61420156,61435602,61436219,	61420042,61420274,61435737,61436309,	LOC100996570	ID=rna1586;Name=XR_159043.1;Parent=gene1146;Dbxref=GeneID:100996570,Genbank:XR_159043.1;gbkey=misc_RNA;product=uncharacterized LOC100996570;transcript_id=XR_159043.1|ID=gene1146;Name=LOC100996570;Dbxref=GeneID:100996570;gbkey=Gene;gene=LOC100996570	XR_159043.1		Intergenic	RefSeq	971
p34268_v4	0.34911	0.0330406	2.15818	down	10.8492	10.4268	10.975	9.59883	9.13406	10.1887	0	TCAAGGAACATCTCACCAATTTCAAATCGGGACCCCACTGGAAAATGGACTGTCCAACTC	ENST00000550380.1	12	+	76653618	76696593	4	76653618,76685895,76687592,76696541,	76653761,76686050,76687785,76696593,	ENSG00000257219.1	gene_id "ENSG00000257219.1"; transcript_id "ENST00000550380.1"; gene_type "processed_transcript"; gene_status "NOVEL"; gene_name "RP11-54A9.1"; transcript_type "processed_transcript"; transcript_status "KNOWN"; transcript_name "RP11-54A9.1-002"; level 2; havana_gene "OTTHUMG00000169875.1"; havana_transcript "OTTHUMT00000406353.1";	ENST00000550380.1		Intergenic	ENSEMBL	543
p12698	0.346721	0.00208574	2.67084	down	6.27842	6.37076	6.04303	4.77318	4.53359	5.13356	0	CTTGAAGAAGAAATTCTGCATTGCATTGGAAGGCTTCTGGGAAGACCTATGGTTTAACTT	ENST00000505575.1	4	+	43135883	43236973	5	43135883,43195303,43197898,43233251,43236784,	43136003,43195409,43197935,43233405,43236973,	ENSG00000248939.1	gene_id "ENSG00000248939.1"; transcript_id "ENST00000505575.1"; gene_type "lincRNA"; gene_status "NOVEL"; gene_name "RP11-395F4.1"; transcript_type "lincRNA"; transcript_status "KNOWN"; transcript_name "RP11-395F4.1-001"; level 2; tag "basic"; havana_gene "OTTHUMG00000160432.1"; havana_transcript "OTTHUMT00000360573.1";	TCONS_00007522;XLOC_003525		Intergenic	ENSEMBL	606
p24912	0.350581	0.0357902	2.51103	down	3.75397	4.49342	3.26826	2.64471	2.05287	2.83323	0	CTACACAGAGGGGATAATTTCTGAAGGAAAGAAGAAAGTAAATTCCTTAATCACCCTTAT	XR_110369.3	12	-	65893368	66036152	6	65893368,65950537,65952181,65955643,65963770,66035818,	65893864,65950777,65952594,65955721,65963828,66036152,	LOC100507065	ID=rna27203;Name=XR_110369.3;Parent=gene22739;Dbxref=GeneID:100507065,Genbank:XR_110369.3;gbkey=misc_RNA;product=uncharacterized LOC100507065%2C transcript variant 1;transcript_id=XR_110369.3|ID=gene22739;Name=LOC100507065;Dbxref=GeneID:100507065;gbkey=Gene;gene=LOC100507065	XR_110369.3		Intergenic	RefSeq	1619
p15460	0.346721	0.00532091	2.41496	down	5.59783	5.83589	5.54241	3.96088	4.60493	4.59432	0	GGCCATTACCCCTCCACTTGGAAATGAAAAAGATAAACTAATTGAAGCAGTGAGAAGAGA	ENST00000429134.1	7	+	124569926	124765961	5	124569926,124580333,124660386,124756927,124765878,	124570070,124580439,124660467,124757082,124765961,	ENSG00000224897.2	gene_id "ENSG00000224897.2"; transcript_id "ENST00000429134.1"; gene_type "processed_transcript"; gene_status "NOVEL"; gene_name "RP11-3B12.1"; transcript_type "processed_transcript"; transcript_status "KNOWN"; transcript_name "RP11-3B12.1-004"; level 2; havana_gene "OTTHUMG00000157170.1"; havana_transcript "OTTHUMT00000347738.1";	ENST00000429134.1		Antisense	ENSEMBL	569
p21871	0.354588	0.0479466	2.03673	down	5.03571	4.34712	4.02808	3.25954	3.2088	3.8638	0	TAACGTGAGAAGGAATTATGTCTCTGAATACTTTCTTACCCCATCAAATATGAGCAGGTA	TCONS_00006545	3	-	78071948	78079091	2	78071948,78078901,	78072050,78079091,	XLOC_003165	Gene_id=XLOC_003165;Gene_name=linc-ZNF717-1;Transcript_id=TCONS_00006545;Transcript_name=linc-ZNF717-1;	XLOC_003165		Intergenic	HumanLincRNACatalog	292
p24620	0.346721	0.0168726	3.05173	down	3.50828	4.63824	4.16561	2.7661	2.00966	2.70748	0	TTTTCCTGAGAGTCTCTAAGTGACTCACTGCATCACGTAAAACTAAGAAAAAGGATGTCC	TCONS_00016948	X	-	46185713	46187080	2	46185713,46186985,	46185889,46187080,	XLOC_008151	Gene_id=XLOC_008151;Gene_name=linc-CXorf36-3;Transcript_id=TCONS_00016948;Transcript_name=linc-CXorf36-3;	XLOC_008151		Intergenic	HumanLincRNACatalog	271
p13493	0.346721	0.0122394	3.06434	down	4.5673	4.99642	4.22676	2.43905	3.03737	3.46732	0	TCTCCCAACTCTCAACACGTCATTTTAGAAAGCAGCATTCAAGGTGCAATTTTAAAGTTA	ENST00000521805.1	5	-	163546103	163661103	5	163546103,163621150,163657335,163658778,163661035,	163546282,163621362,163657454,163658874,163661103,	ENSG00000253331.1	gene_id "ENSG00000253331.1"; transcript_id "ENST00000521805.1"; gene_type "lincRNA"; gene_status "NOVEL"; gene_name "CTC-207P7.1"; transcript_type "lincRNA"; transcript_status "KNOWN"; transcript_name "CTC-207P7.1-001"; level 2; tag "basic"; havana_gene "OTTHUMG00000162876.1"; havana_transcript "OTTHUMT00000370923.1";	ENST00000521805.1	CTC-207P7.1	Intergenic	ENSEMBL	674
p9182	0.346721	0.0141993	2.6181	down	6.07307	5.48357	5.34083	3.79278	4.29171	4.64742	0	GATGTATTTCGCCATGATTACCTCCCACCAAATGATACTAATACTCCTGAAAATACTTAA	ENST00000444266.1	2	-	67148641	67149589	3	67148641,67149296,67149433,	67148824,67149354,67149589,	ENSG00000232688.1	gene_id "ENSG00000232688.1"; transcript_id "ENST00000444266.1"; gene_type "lincRNA"; gene_status "NOVEL"; gene_name "AC007403.1"; transcript_type "lincRNA"; transcript_status "KNOWN"; transcript_name "AC007403.1-001"; level 1; tag "basic"; tag "exp_conf"; havana_gene "OTTHUMG00000152852.1"; havana_transcript "OTTHUMT00000328261.1";	ENCODE_2418_397;TCONS_00003314;XLOC_002141		Intergenic	ENSEMBL	397
p14574	0.346721	0.0132528	2.07575	down	7.35565	6.98824	7.5327	6.05455	6.0431	6.61805	0	CTGCAGCTGAAATACCATGACCCAGATATTGAACACACAGAATAATTAAACTTTTCGTCT	ENST00000550475.1	6	+	57393095	57453414	3	57393095,57398131,57453298,	57393184,57398317,57453414,	ENSG00000146143.12	gene_id "ENSG00000146143.12"; transcript_id "ENST00000550475.1"; gene_type "processed_transcript"; gene_status "KNOWN"; gene_name "PRIM2"; transcript_type "processed_transcript"; transcript_status "KNOWN"; transcript_name "PRIM2-008"; level 2; tag "sequence_error"; havana_gene "OTTHUMG00000016190.4"; havana_transcript "OTTHUMT00000404460.1";	ENST00000550475.1	PRIM2	Antisense	ENSEMBL	391
p5427	0.350581	0.0365646	2.19601	down	7.20111	6.54726	7.11434	5.48024	5.55044	6.42737	0	TGATATTCTGGCTTCTGAAGACTTGTCATTGCTACAGCAACACCGAGATGCATTGGCACT	ENST00000568541.1	15	+	24451930	24471001	3	24451930,24470442,24470887,	24452040,24470774,24471001,	ENSG00000260780.1	gene_id "ENSG00000260780.1"; transcript_id "ENST00000568541.1"; gene_type "lincRNA"; gene_status "NOVEL"; gene_name "RP11-580I1.1"; transcript_type "lincRNA"; transcript_status "KNOWN"; transcript_name "RP11-580I1.1-001"; level 2; tag "basic"; havana_gene "OTTHUMG00000176383.1"; havana_transcript "OTTHUMT00000431873.1";	ENST00000568541.1		Intergenic	ENSEMBL	556
p13346	0.348944	0.02684	4.50926	down	7.85137	7.90428	8.9088	5.8097	5.26531	7.07076	0	TTGCTGTGATAAACTTTTTGCTTTGCCAGGTATGGGCTACAATGATTGGTTGAAATCATC	ENST00000333482.4	5	-	115027158	115027864	1	115027158,	115027864,	ENSG00000249021.1	gene_id "ENSG00000249021.1"; transcript_id "ENST00000333482.4"; gene_type "lincRNA"; gene_status "NOVEL"; gene_name "CTC-505O3.3"; transcript_type "lincRNA"; transcript_status "KNOWN"; transcript_name "CTC-505O3.3-001"; level 2; tag "basic"; havana_gene "OTTHUMG00000163234.1"; havana_transcript "OTTHUMT00000372268.1";	ENST00000333482.4	CTC-505O3.3	Intergenic	ENSEMBL	706
p19041	0.346721	0.0164737	2.13644	down	4.44854	4.20083	4.38908	3.77893	2.94257	3.03131	0	ATGAGGAAAACAAGAGCATCCCTATTCTGCTCTTATCTCACCGAGTTCCATGGCCATTCT	TCONS_00021999	13	-	48270850	48279452	3	48270850,48273751,48278995,	48270892,48273914,48279452,	XLOC_010599	Gene_id=XLOC_010599;Gene_name=linc-HTR2A-4;Transcript_id=TCONS_00021999;Transcript_name=linc-HTR2A-4;	XLOC_010599		Intergenic	HumanLincRNACatalog	662
p5094	0.346721	0.00959781	2.16702	down	7.04697	6.77761	7.0338	5.5762	5.65455	6.28049	0	AAACATCACAGTCCAACATTCAACAGTACCACAGTGCATCTACAATGTCCCAAGCTTTAG	ENST00000565366.1	15	-	36933386	36961298	3	36933386,36934036,36961177,	36933705,36934161,36961298,	ENSG00000261191.1	gene_id "ENSG00000261191.1"; transcript_id "ENST00000565366.1"; gene_type "antisense"; gene_status "NOVEL"; gene_name "RP11-16L14.2"; transcript_type "antisense"; transcript_status "KNOWN"; transcript_name "RP11-16L14.2-001"; level 2; tag "basic"; havana_gene "OTTHUMG00000172663.1"; havana_transcript "OTTHUMT00000419758.1";	ENST00000565366.1		Antisense	ENSEMBL	565
p23783	0.348745	0.0223671	3.72802	down	5.59109	6.01035	5.9479	3.07327	3.9479	4.83294	0	GGAGTTCACATTTCAAGTTTCAAGGAGACACAGAAGATAGCCAATTGTAGAAAAGAAGAA	TCONS_00013446	7	+	52492896	52493547	2	52492896,52493085,	52492975,52493547,	XLOC_006099	Gene_id=XLOC_006099;Gene_name=linc-POM121L12-3;Transcript_id=TCONS_00013446;Transcript_name=linc-POM121L12-3;	XLOC_006099		Intergenic	HumanLincRNACatalog	541
p14740	0.353165	0.044598	2.12398	down	4.17648	3.92635	3.15851	2.25326	2.99499	2.75279	0	CACATCCTCCAACAGTGTCATGGTACAAACATAAAATATAATAGAGAACAATGACCAACT	ENST00000565399.1	6	+	141768147	141772143	1	141768147,	141772143,	ENSG00000259828.1	gene_id "ENSG00000259828.1"; transcript_id "ENST00000565399.1"; gene_type "lincRNA"; gene_status "NOVEL"; gene_name "RP11-63E9.1"; transcript_type "lincRNA"; transcript_status "KNOWN"; transcript_name "RP11-63E9.1-001"; level 2; tag "basic"; havana_gene "OTTHUMG00000175944.1"; havana_transcript "OTTHUMT00000431299.1";	ENST00000565399.1		Intergenic	ENSEMBL	3996
RNA147087|p0191_imsncRNA291	0.34911	0.0281768	2.04261	down	3.90577	4.85944	4.54713	3.21196	3.6326	3.37654	0	TACATTCCTTTTATCTATGTATTTTATAGTTACACCAGGAATATTGGATGTAGGAAATTC	RNA147087|p0191_imsncRNA291													unpublished data	NA
p10357	0.350581	0.0365942	2.54679	down	4.9754	4.35206	4.25398	2.4439	3.66374	3.42776	0	GGCCGAGCAGTATTTACTGCTAGGAACAAAGGAACGAATAAATGAAGCTATTAAATCTCA	ENST00000439451.1	20	-	14885586	14910161	2	14885586,14910020,	14886675,14910161,	ENSG00000235914.1	gene_id "ENSG00000235914.1"; transcript_id "ENST00000439451.1"; gene_type "antisense"; gene_status "KNOWN"; gene_name "MACROD2-AS1"; transcript_type "antisense"; transcript_status "KNOWN"; transcript_name "MACROD2-AS1-002"; level 2; tag "basic"; havana_gene "OTTHUMG00000031920.1"; havana_transcript "OTTHUMT00000078092.1";	LIT3385;CombinedLit_132_1230	MACROD2-AS1	Antisense	ENSEMBL	1230
p3209	0.348944	0.0272407	2.19422	down	10.325	10.7056	10.8163	9.38762	9.01904	10.0392	0	TTAGAGGCCAGAGAGGGACAGATGCTTGGTGGGAATTGTAGTGCGAAGCCAAGAGGCTCC	ENST00000551846.1	12	-	56423432	56435590	2	56423432,56435408,	56423550,56435590,	ENSG00000257449.1	gene_id "ENSG00000257449.1"; transcript_id "ENST00000551846.1"; gene_type "antisense"; gene_status "NOVEL"; gene_name "RP11-603J24.4"; transcript_type "antisense"; transcript_status "KNOWN"; transcript_name "RP11-603J24.4-001"; level 2; tag "basic"; havana_gene "OTTHUMG00000170138.1"; havana_transcript "OTTHUMT00000407615.1";	ENST00000551846.1		Antisense	ENSEMBL	300
p15032	0.34911	0.0304322	2.07003	down	5.04447	5.76014	4.89802	4.09557	3.93236	4.52575	0	AGAAAAATCTGACACTAGTGTGGAGAATGAACTTCTTGGACGAGCAAACAGAGACCGGAA	ENST00000416376.2	7	-	104425658	104444554	7	104425658,104426177,104426964,104438783,104440264,104443285,104444402,	104425805,104426232,104427028,104438854,104440516,104443410,104444554,	ENSG00000226869.2	gene_id "ENSG00000226869.2"; transcript_id "ENST00000416376.2"; gene_type "processed_transcript"; gene_status "NOVEL"; gene_name "LHFPL3-AS1"; transcript_type "antisense"; transcript_status "KNOWN"; transcript_name "LHFPL3-AS1-002"; level 2; tag "basic"; havana_gene "OTTHUMG00000157276.2"; havana_transcript "OTTHUMT00000348294.2";	ENST00000416376.2	LHFPL3-AS1	Antisense	ENSEMBL	866
p21628	0.346721	0.00725094	4.40944	down	7.43147	7.72916	7.7169	5.08982	5.05509	6.31082	0	CTGTTGTTGTCTAAACGTATATCCGTGTATGTAAACCGCCTGTTCTCTAAACATATATAT	TCONS_00029159	21	-	44808522	44809763	3	44808522,44808605,44808785,	44808533,44808641,44809763,	XLOC_014103	Gene_id=XLOC_014103;Gene_name=linc-U2AF1-3;Transcript_id=TCONS_00029159;Transcript_name=linc-U2AF1-3;	XLOC_014103		Intergenic	HumanLincRNACatalog	1025
p27212	0.348944	0.0276966	2.53785	down	3.70466	4.68446	3.95741	2.75746	2.31633	3.24192	0	CCTGTGTTGCACGGCTTTTAAGTTCACGTATGAACAACTCAAGATAATTTTGCATATTTA	uc.367+	14	+	33844462	33844760	1	33844462,	33844760,	uc.367+	uc.367+	UCRs_97_298		Intronic	UCR	298
p43773_v4	0.328765	0.000355989	2.1337	down	4.78094	4.60229	4.51626	3.52763	3.64594	3.44583	0	CACATCAGACTTCAGTAACACAGGATTTATCTCAGTATCCATTTTTTCTGATTCTCAGTT	XR_244293.1	21	-	16777245	16785242	3	16777245,16778198,16784994,	16778083,16778248,16785242,	none					RefSeq	1136
p13090	0.346721	0.00513758	2.00964	down	4.54117	4.45713	4.06171	3.17182	3.33299	3.53439	0	CCTTGGATTTGGAAATTATGGAAGGAGAAATTATTATTGGAACTGTACTGAACCTTTAGC	ENST00000510065.1	5	-	12914179	13032998	3	12914179,13032122,13032897,	12914283,13032187,13032998,	ENSG00000248457.1	gene_id "ENSG00000248457.1"; transcript_id "ENST00000510065.1"; gene_type "lincRNA"; gene_status "NOVEL"; gene_name "RP11-419C19.2"; transcript_type "lincRNA"; transcript_status "KNOWN"; transcript_name "RP11-419C19.2-001"; level 2; tag "mRNA_end_NF"; tag "basic"; havana_gene "OTTHUMG00000161742.1"; havana_transcript "OTTHUMT00000365964.1";	TCONS_00009607;XLOC_004738		Intergenic	ENSEMBL	270
p8130	0.346721	0.000738234	3.29313	down	10.1301	9.74843	10.0237	8.20474	8.02069	8.51849	0	TGTAAACTCAAAGACAGATTCTGGAAGACCTCCTTCTTCTCTCCTGTTATGTGCGTGAGA	ENST00000589365.1	19	-	2847224	2858714	2	2847224,2858317,	2847382,2858714,	ENSG00000267063.1	gene_id "ENSG00000267063.1"; transcript_id "ENST00000589365.1"; gene_type "antisense"; gene_status "NOVEL"; gene_name "AC006130.3"; transcript_type "antisense"; transcript_status "KNOWN"; transcript_name "AC006130.3-001"; level 2; tag "basic"; havana_gene "OTTHUMG00000180564.1"; havana_transcript "OTTHUMT00000451921.1";	ENST00000589365.1		Antisense	ENSEMBL	555
p2506	0.34911	0.0285719	3.73414	down	5.43209	4.47276	4.22184	2.39951	2.35465	3.67019	0	GTCTCAAGACCTCTTTTGGAACATTTTATATTGCTTGTTTTGATGCCCAGTTTATGGAAT	ENST00000544663.1	11	-	115403039	115403671	2	115403039,115403637,	115403299,115403671,	ENSG00000256281.1	gene_id "ENSG00000256281.1"; transcript_id "ENST00000544663.1"; gene_type "lincRNA"; gene_status "NOVEL"; gene_name "RP11-136I14.2"; transcript_type "lincRNA"; transcript_status "KNOWN"; transcript_name "RP11-136I14.2-001"; level 2; tag "basic"; havana_gene "OTTHUMG00000168237.1"; havana_transcript "OTTHUMT00000398932.1";	ENST00000544663.1		Intergenic	ENSEMBL	294
p12364	0.346721	0.0033625	2.01753	down	7.13513	6.83454	7.03887	5.89473	5.81754	6.2585	0	CTGGTAAAAGAAACTTGTAGTGTGGTCTGATTGTGCCAGGGAATAAATAAGAAATAAGGA	ENST00000564854.1	4	-	86933448	86935027	1	86933448,	86935027,	ENSG00000261496.1	gene_id "ENSG00000261496.1"; transcript_id "ENST00000564854.1"; gene_type "sense_overlapping"; gene_status "NOVEL"; gene_name "RP13-514E23.1"; transcript_type "sense_overlapping"; transcript_status "KNOWN"; transcript_name "RP13-514E23.1-001"; level 2; tag "basic"; havana_gene "OTTHUMG00000176279.1"; havana_transcript "OTTHUMT00000431715.1";	ENST00000564854.1		Sense	ENSEMBL	1579
p15923	0.346721	0.00839075	3.24922	down	5.26745	5.72965	4.58081	3.64252	3.28013	3.55498	0	TTTATCTGAACTCAGCAGCAAGAGATAACATAAATGGAAGTAATTTGGAAGCAGAAAGCA	ENST00000522005.1	8	-	125048250	125052709	2	125048250,125052680,	125048548,125052709,	ENSG00000254249.1	gene_id "ENSG00000254249.1"; transcript_id "ENST00000522005.1"; gene_type "antisense"; gene_status "NOVEL"; gene_name "RP11-959I15.4"; transcript_type "antisense"; transcript_status "KNOWN"; transcript_name "RP11-959I15.4-001"; level 2; tag "basic"; havana_gene "OTTHUMG00000165002.1"; havana_transcript "OTTHUMT00000381407.1";	ENST00000522005.1		Antisense	ENSEMBL	327
p15772	0.350581	0.0363787	2.82141	down	5.41315	4.80352	4.87871	3.5131	4.31476	2.77827	0	GGTCGACAAGCAAAGCAACAGGAAAAGGATCTATGAGCTTTCATTAGAAGATGCTACTAT	ENST00000521872.1	8	-	75259991	75262285	2	75259991,75262144,	75260440,75262285,	ENSG00000253596.1	gene_id "ENSG00000253596.1"; transcript_id "ENST00000521872.1"; gene_type "antisense"; gene_status "NOVEL"; gene_name "CTD-2320G14.2"; transcript_type "antisense"; transcript_status "KNOWN"; transcript_name "CTD-2320G14.2-001"; level 1; tag "basic"; tag "exp_conf"; havana_gene "OTTHUMG00000164510.1"; havana_transcript "OTTHUMT00000379067.1";	ENST00000521872.1	CTD-2320G14.2	Antisense	ENSEMBL	590
p9654	0.346721	0.00450461	2.43947	down	3.67955	4.28947	3.72393	2.82311	2.48837	2.52176	0	CCTGGCTCTGAGAAGAAGCTACAAAACACAGTAGAAGAAAAAGAAAACAGTCTTTTAAAG	ENST00000492300.1	2	+	9255325	9257013	2	9255325,9256701,	9255381,9257013,	ENSG00000244310.1	gene_id "ENSG00000244310.1"; transcript_id "ENST00000492300.1"; gene_type "lincRNA"; gene_status "NOVEL"; gene_name "RP11-734K21.3"; transcript_type "lincRNA"; transcript_status "KNOWN"; transcript_name "RP11-734K21.3-001"; level 2; tag "basic"; havana_gene "OTTHUMG00000159112.1"; havana_transcript "OTTHUMT00000353397.1";	ENST00000492300.1		Intergenic	ENSEMBL	368
p36768_v4	0.348944	0.0269217	2.87693	down	9.62327	8.68414	9.96221	8.13268	7.43718	8.12619	0	GGTTAACACGCACGTGGAGGTTGGTTAAAGGGAAGACCTGGGTTTTAGTCCTGTCTCCAT	ENST00000411573.2	17	-	45976150	46018725	3	45976150,45995817,46018701,	45977744,45995937,46018725,	ENSG00000234494.2	gene_id "ENSG00000234494.2"; transcript_id "ENST00000411573.2"; gene_type "antisense"; gene_status "NOVEL"; gene_name "AC003665.1"; transcript_type "antisense"; transcript_status "KNOWN"; transcript_name "AC003665.1-003"; level 2; tag "basic"; havana_gene "OTTHUMG00000132519.2"; havana_transcript "OTTHUMT00000255705.2";	ENST00000411573.2		Antisense	ENSEMBL	1738
p17893	0.346721	0.00837213	2.38381	down	6.46937	6.00375	6.42606	4.83019	4.83912	5.47006	0	AGAAATCACCTAAGGAGAAAACAGGAAGCAGATTTGAAACTGTGGCCACCAACGACACGA	TCONS_00018399	10	-	2229857	2231694	2	2229857,2231655,	2230126,2231694,	XLOC_008686	Gene_id=XLOC_008686;Gene_name=linc-ADARB2-3;Transcript_id=TCONS_00018399;Transcript_name=linc-ADARB2-3;	XLOC_008686		Intergenic	HumanLincRNACatalog	308
p16922	0.353608	0.0453869	2.00962	down	6.96249	6.32636	7.00856	5.52301	5.45052	6.30311	0	AAGTGACTATACTTCGGAAACCCCTGATCCAACAAAAGCTAACTTTGGGTAAGTGGTGGG	ENST00000437097.1	9	+	128329857	128335302	3	128329857,128331039,128335173,	128330272,128331128,128335302,	ENSG00000227068.1	gene_id "ENSG00000227068.1"; transcript_id "ENST00000437097.1"; gene_type "antisense"; gene_status "NOVEL"; gene_name "RP11-12A16.3"; transcript_type "antisense"; transcript_status "KNOWN"; transcript_name "RP11-12A16.3-001"; level 2; tag "basic"; havana_gene "OTTHUMG00000020681.1"; havana_transcript "OTTHUMT00000054082.1";	ENST00000437097.1		Antisense	ENSEMBL	633
p24713	0.346721	0.00128317	4.22123	down	4.60836	4.28824	4.24157	2.3922	1.86528	2.6477	0	AAACTTGTGGCTCCTTCTTAAAAACTGGAGGCAAGTAAGATCCTAGCCAAAACCAGAGGC	TCONS_00017226	X	+	105252195	105253194	3	105252195,105252338,105253150,	105252231,105252515,105253194,	XLOC_008041	Gene_id=XLOC_008041;Gene_name=linc-MUM1L1-1;Transcript_id=TCONS_00017226;Transcript_name=linc-MUM1L1-1;	XLOC_008041		Intergenic	HumanLincRNACatalog	257
p23279	0.34911	0.0317388	6.50969	down	7.18909	7.33632	5.91179	4.75175	2.70842	4.86926	0	AAAGTAGAAATGCATGCTTACATGTCTAAGGCCTGAAAAATTGGTAGTGACATCCCAAAA	TCONS_00012793	6	-	138144830	138148172	2	138144830,138148057,	138145714,138148172,	XLOC_005849	Gene_id=XLOC_005849;Gene_name=linc-OLIG3-1;Transcript_id=TCONS_00012793;Transcript_name=linc-OLIG3-1;	XLOC_005849		Intergenic	HumanLincRNACatalog	999
p9088	0.34911	0.0322754	2.1874	down	3.6538	3.77052	3.52551	2.24557	2.11322	3.20338	0	GTGGTCTGTACTTCATCCAATGAAGGGTGTAACAGTAAAAAATAAAGTAGAATGCACACA	ENST00000598798.1	2	-	38257367	38263433	2	38257367,38263292,	38257617,38263433,	ENSG00000235848.2	gene_id "ENSG00000235848.2"; transcript_id "ENST00000598798.1"; gene_type "antisense"; gene_status "NOVEL"; gene_name "RMDN2-AS1"; transcript_type "antisense"; transcript_status "KNOWN"; transcript_name "RMDN2-AS1-002"; level 2; tag "RNA_Seq_supported_only"; tag "basic"; havana_gene "OTTHUMG00000152578.3"; havana_transcript "OTTHUMT00000461618.1";	ENST00000598798.1	RMDN2-AS1	Antisense	ENSEMBL	391
p22483	0.346721	0.0132476	2.07917	down	6.40014	6.50138	5.97539	4.98446	5.11624	5.60819	0	AGTGCATAGATGAATTGCCTAAGGTTCTGCTTCTAGTTGGTGTCCTGCGAATCAGTTCAG	TCONS_00008776	4	+	38281623	38289761	3	38281623,38288781,38289653,	38281710,38288947,38289761,	XLOC_003508	Gene_id=XLOC_003508;Gene_name=linc-KLF3-5;Transcript_id=TCONS_00008776;Transcript_name=linc-KLF3-5;	XLOC_003508		Intergenic	HumanLincRNACatalog	361
p27883	0.346924	0.0185952	2.61318	down	9.89971	10.0396	9.64232	7.86702	8.50498	9.05221	0	TGTCAGGTAGCGGTTGAAGTGGAACTCCTTCTCCAGCTCCAGTGTCTGGTAGCGCGTGTA	hox-HOXA6-14	7	+	26958526	26958805	1	26958526,	26958805,	hox-HOXA6-14	transcript_type=Hox Transcripts	hox-HOXA6-14		Intergenic	HOX Loci	280
p15709	0.346721	0.00693119	2.10424	down	6.19786	5.94565	5.73372	4.67545	4.77846	5.20342	0	CAGATGCTGTGGGGATTAGAAAGATAAGAATGTCATGACCAACTTTTTATACCACTAAAT	ENST00000522281.1	8	-	58802134	58803368	2	58802134,58803159,	58802705,58803368,	ENSG00000253376.1	gene_id "ENSG00000253376.1"; transcript_id "ENST00000522281.1"; gene_type "lincRNA"; gene_status "NOVEL"; gene_name "RP11-44D19.1"; transcript_type "lincRNA"; transcript_status "KNOWN"; transcript_name "RP11-44D19.1-001"; level 2; tag "basic"; havana_gene "OTTHUMG00000164280.1"; havana_transcript "OTTHUMT00000378086.1";	ENST00000522281.1		Intergenic	ENSEMBL	780
p4316	0.346721	0.00210927	2.12872	down	6.20813	6.3112	6.12456	4.91936	5.05146	5.4031	0	TACTGGAGACCTTGGCTTTTTATTTCCCTGACACAACTTCACACTGCTGGAGCAATGCTT	ENST00000444795.1	13	+	104077549	104080035	2	104077549,104079665,	104077671,104080035,	ENSG00000234551.1	gene_id "ENSG00000234551.1"; transcript_id "ENST00000444795.1"; gene_type "lincRNA"; gene_status "NOVEL"; gene_name "RP11-123H22.1"; transcript_type "lincRNA"; transcript_status "KNOWN"; transcript_name "RP11-123H22.1-001"; level 1; tag "basic"; tag "exp_conf"; havana_gene "OTTHUMG00000017314.1"; havana_transcript "OTTHUMT00000045717.1";	ENCODE_1850_492		Intergenic	ENSEMBL	492
p21503	0.346721	0.00122055	2.55818	down	6.74266	6.7638	6.75688	5.27601	5.19461	5.72737	0	CCCCAGTAGAGAAAGCACTGGAGAACAACATTCATTCTTCCTTAATAAATCTTAGTTTTA	TCONS_00027903	20	+	10845302	10847830	3	10845302,10846404,10847660,	10845376,10846428,10847830,	XLOC_013461	Gene_id=XLOC_013461;Gene_name=linc-BTBD3-3;Transcript_id=TCONS_00027903;Transcript_name=linc-BTBD3-3;	XLOC_013461		Intergenic	HumanLincRNACatalog	268
p42228_v4	0.346721	0.0106035	2.9542	down	5.26619	4.98213	4.41	2.87395	3.67415	3.42191	0	GTCCAACAATAACATTTCCAAGATAGGAAGAAAGCGAGGGTTCAAAACGGAGAAGATGAA	XR_242869.1	11	-	38874352	38906736	6	38874352,38888255,38891626,38897599,38900816,38906680,	38874362,38888258,38891767,38897737,38900910,38906736,	none					RefSeq	442
p3578	0.34911	0.0305763	2.34644	down	6.99719	6.95025	6.77499	5.79788	4.98553	6.2476	0	TGTGTTGACCGTATCTCCAAATAGACAATAACGAGGCATCTTGATTCCCACAACTCCAGC	ENST00000545424.1	12	+	14720683	14772232	5	14720683,14720952,14765812,14767455,14772085,	14720740,14721126,14765860,14767504,14772232,	ENSG00000256751.1	gene_id "ENSG00000256751.1"; transcript_id "ENST00000545424.1"; gene_type "antisense"; gene_status "NOVEL"; gene_name "RP11-695J4.2"; transcript_type "antisense"; transcript_status "KNOWN"; transcript_name "RP11-695J4.2-002"; level 2; tag "basic"; havana_gene "OTTHUMG00000168733.2"; havana_transcript "OTTHUMT00000401078.1";	ENST00000545424.1		Antisense	ENSEMBL	475
p25357	0.346721	0.0136391	2.85043	down	4.53532	3.92205	4.67995	2.51151	2.68524	3.40703	0	GGCTTCTTATGTTTTTGTATTTGGTTGCTCATTAGAGATAAGCCTGATTATTTGGCATTG	XR_158791.1	5	+	56866168	56913258	6	56866168,56869857,56873660,56874662,56910003,56912551,	56866209,56869927,56873751,56874741,56910328,56913258,	LOC100996645	ID=rna11935;Name=XR_158791.1;Parent=gene9886;Dbxref=GeneID:100996645,Genbank:XR_158791.1;gbkey=misc_RNA;product=uncharacterized LOC100996645;transcript_id=XR_158791.1|ID=gene9886;Name=LOC100996645;Dbxref=GeneID:100996645;gbkey=Gene;gene=LOC100996645	XR_158791.1		Intergenic	RefSeq	1313
p17461	0.346721	0.00943297	2.29491	down	3.27517	3.57057	3.72146	2.27921	1.96751	2.72517	0	ATTCAGCCTCTGACTTTTTGGGAGGAAATCATTTTCAAAGAAATGTCCCCCACCAAAAAA	TCONS_00001602	1	-	98389796	98394621	2	98389796,98394579,	98389999,98394621,	XLOC_000932	Gene_id=XLOC_000932;Gene_name=linc-DPYD-1;Transcript_id=TCONS_00001602;Transcript_name=linc-DPYD-1;	XLOC_000932		Intergenic	HumanLincRNACatalog	245
p15935	0.346721	0.00650681	2.14315	down	4.79061	4.92743	5.06276	3.76083	3.52535	4.19543	0	GGCTTCATTCGAGTTAACTTTGCTGGTAATATGCACGTATGTGTTTAATTCCATTTTTGA	ENST00000520224.1	8	-	127779120	127802882	4	127779120,127781078,127781644,127802812,	127779229,127781135,127781700,127802882,	ENSG00000253573.1	gene_id "ENSG00000253573.1"; transcript_id "ENST00000520224.1"; gene_type "lincRNA"; gene_status "NOVEL"; gene_name "RP11-351C8.1"; transcript_type "lincRNA"; transcript_status "KNOWN"; transcript_name "RP11-351C8.1-001"; level 2; tag "basic"; havana_gene "OTTHUMG00000165046.2"; havana_transcript "OTTHUMT00000381548.2";	ENST00000520224.1		Intergenic	ENSEMBL	292
p44261_v4	0.350581	0.0366596	2.05791	down	8.84965	8.65623	9.40928	7.50897	8.37563	7.90702	0	GGGCTCTGGAATGCCTTTGTACATATGTGTGTTTAATGTGTTTTGAAGTGAATAAAATTC	uc031tac.1	8	-	7413659	7431920	6	7413659,7415849,7416416,7421309,7423499,7431710,	7415184,7415958,7416626,7422834,7423608,7431920,	FAM90A7P	NR_046343	Homo sapiens family with sequence similarity 90, member A7, pseudogene (FAM90A7P), non-coding RNA.			UCSC	3688
p18122	0.346721	0.00875511	2.62345	down	6.07819	5.65087	5.71426	4.29944	4.0497	4.91978	0	CAATGGAAATTGCAGAAATAGATCAACTGCAAAAGGTTACATAGGGGACCCGCATGCTAC	TCONS_00018711	10	+	37910290	37921816	3	37910290,37910619,37921657,	37910435,37910730,37921816,	XLOC_008456	Gene_id=XLOC_008456;Gene_name=linc-ZNF33A-3;Transcript_id=TCONS_00018711;Transcript_name=linc-ZNF33A-3;	XLOC_008456		Intergenic	HumanLincRNACatalog	415
p29142	0.350581	0.0371483	2.59988	down	3.5504	3.8129	2.42448	1.66162	1.84689	2.14394	0	GAGCATTTGGAAACACGTGTATAAATATTTGAAGCACAAAACCAGAGAGATGCTCTTATG	ENST00000561513.1	16	-	52116976	52119021	3	52116976,52118624,52118977,	52118478,52118736,52119021,	ENSG00000260268.1	gene_id "ENSG00000260268.1"; transcript_id "ENST00000561513.1"; gene_type "lincRNA"; gene_status "NOVEL"; gene_name "RP11-152O14.2"; transcript_type "lincRNA"; transcript_status "KNOWN"; transcript_name "RP11-152O14.2-001"; level 2; tag "basic"; havana_gene "OTTHUMG00000173235.1"; havana_transcript "OTTHUMT00000422564.1";	TCONS_00024269;XLOC_011941		Intergenic	ENSEMBL	1658
p5351	0.346721	0.0071993	2.01767	down	6.65193	6.74358	6.87895	5.43342	5.71637	6.08661	0	ACGGCGGTGAGGTTTTAGGAATTATGATTCCTTTCCTAAATTTCTTTGCTATTTGTTATG	ENST00000556708.1	15	-	93960078	93965805	2	93960078,93965766,	93962323,93965805,	ENSG00000258909.1	gene_id "ENSG00000258909.1"; transcript_id "ENST00000556708.1"; gene_type "lincRNA"; gene_status "NOVEL"; gene_name "RP11-164C12.2"; transcript_type "lincRNA"; transcript_status "KNOWN"; transcript_name "RP11-164C12.2-001"; level 2; tag "basic"; havana_gene "OTTHUMG00000171793.1"; havana_transcript "OTTHUMT00000415160.1";	uc002bta.1;UCSC_3906_2284		Intergenic	ENSEMBL	2284
p27571	0.353178	0.0446295	2.3163	down	4.51537	4.94541	4.35211	3.57069	2.66285	3.94389	0	CTGACATCAAGAGTCGAGAAACATCAAGGATTTTGACAGCATACAAAATGACAAGCAGCC	uc.150-	5	-	3512620	3512882	1	3512620,	3512882,	uc.150-	uc.150-	uc.150-		Intergenic	UCR	262
p42933_v4	0.346924	0.0192761	2.78648	down	7.2667	7.11889	7.78347	5.50034	5.66038	6.57301	0	CCATTGACATGAGATTACATCCTCTGCCTATAAAAATCCTGGAAGAAAACCTAGGAAATA	XR_429432.1	15	-	22038186	22047489	3	22038186,22038453,22047448,	22038284,22038724,22047489,	none					RefSeq	410
p6458	0.354588	0.0479422	2.45516	down	5.55389	5.66054	5.48893	3.41904	4.41316	4.98371	0	ATAATGTTTGGAGCCTGACTGATATAGGCACAAATCTCAAGTCCACAACTATGTGAACGT	ENST00000564046.1	16	+	64398683	64634150	5	64398683,64509591,64512977,64568894,64634041,	64398799,64509718,64513088,64568979,64634150,	ENSG00000259846.1	gene_id "ENSG00000259846.1"; transcript_id "ENST00000564046.1"; gene_type "lincRNA"; gene_status "NOVEL"; gene_name "RP11-467L24.1"; transcript_type "lincRNA"; transcript_status "KNOWN"; transcript_name "RP11-467L24.1-001"; level 2; tag "basic"; havana_gene "OTTHUMG00000172800.2"; havana_transcript "OTTHUMT00000420524.2";	ENST00000564046.1		Intergenic	ENSEMBL	548
p10044	0.346721	0.0131645	2.52368	down	6.02908	5.45277	5.29234	3.98322	4.09142	4.69297	0	TGGAGAGACATCTGTTTTTTGCATTTGGTCTTTCACTCTTTGTTTTTCTCCGGGAGGATT	ENST00000432608.1	2	+	145425533	145525950	4	145425533,145448605,145523936,145525664,	145425675,145448677,145524097,145525950,	ENSG00000226674.2	gene_id "ENSG00000226674.2"; transcript_id "ENST00000432608.1"; gene_type "lincRNA"; gene_status "NOVEL"; gene_name "AC074093.1"; transcript_type "lincRNA"; transcript_status "KNOWN"; transcript_name "AC074093.1-003"; level 2; havana_gene "OTTHUMG00000153701.2"; havana_transcript "OTTHUMT00000332157.1";	ENST00000432608.1		Intergenic	ENSEMBL	661
p19466	0.352697	0.0436828	2.47866	down	5.5323	5.75367	4.79533	4.36631	3.36285	4.42344	0	TAGGGATAGATCCTTTGCCATGTTGATTAGCTTAATTGTGCCATTTTATTATTTGGGATG	TCONS_00022524	14	+	59592024	59596263	2	59592024,59595624,	59592120,59596263,	XLOC_010847	Gene_id=XLOC_010847;Gene_name=linc-DAAM1-1;Transcript_id=TCONS_00022524;Transcript_name=linc-DAAM1-1;	XLOC_010847		Intergenic	HumanLincRNACatalog	735
p22082	0.348681	0.020495	2.63209	down	3.50395	4.51735	4.22507	2.9314	2.88813	2.23821	0	ATAGTCAAAAACTGGCATGTATATACTTAATCGGTGACATGTAAGTCACATGCCTTTATC	TCONS_00006098	3	+	75273687	75289618	2	75273687,75289335,	75273709,75289618,	XLOC_002709	Gene_id=XLOC_002709;Gene_name=linc-FRG2C-4;Transcript_id=TCONS_00006098;Transcript_name=linc-FRG2C-4;	XLOC_002709		Intergenic	HumanLincRNACatalog	305
p1354	0.346721	0.00785416	2.08918	down	6.0753	5.60944	5.36437	4.55575	4.57647	4.72808	0	GGCTATATTGGCTGACATAAAAGGTAAGAGCAAGAATGCAGAGGATTTCTATCAACATAA	ENST00000415754.1	1	+	208902032	208906529	4	208902032,208902487,208903162,208906442,	208902079,208902622,208903420,208906529,	ENSG00000232812.1	gene_id "ENSG00000232812.1"; transcript_id "ENST00000415754.1"; gene_type "lincRNA"; gene_status "NOVEL"; gene_name "RP11-459K23.2"; transcript_type "lincRNA"; transcript_status "KNOWN"; transcript_name "RP11-459K23.2-001"; level 2; tag "basic"; havana_gene "OTTHUMG00000036136.1"; havana_transcript "OTTHUMT00000088025.1";	ENCODE_1682_527;TCONS_00000375;XLOC_000545		Intergenic	ENSEMBL	527
p40234_v4	0.350435	0.0351098	3.76391	down	7.25912	6.02595	5.56572	3.83182	4.27628	5.006	0	TTCCCCAAACCGGTTTCAGATGAAATTTTAGACCAGACTGCTATGCAATTTTACATAGTA	NR_110203.1	3	-	151468966	151645963	3	151468966,151492393,151645644,	151469299,151492453,151645963,	none					RefSeq	712
p28995	0.34911	0.0311148	3.20367	down	4.68788	5.69664	4.91033	3.56792	2.6372	4.05057	0	TAGCTAAAGGTGTAGTATAAAGTATTTGCTCGTAGGTAATGGAATGTTACCTTTACCCAA	ENST00000441907.1	10	-	2488446	2489546	2	2488446,2489480,	2489144,2489546,	ENSG00000234170.1	gene_id "ENSG00000234170.1"; transcript_id "ENST00000441907.1"; gene_type "lincRNA"; gene_status "NOVEL"; gene_name "RP11-446F3.2"; transcript_type "lincRNA"; transcript_status "KNOWN"; transcript_name "RP11-446F3.2-003"; level 1; tag "basic"; tag "exp_conf"; havana_gene "OTTHUMG00000017549.1"; havana_transcript "OTTHUMT00000046444.1";	ENCODE_893_764;TCONS_00017901;XLOC_008688;TCONS_00018400;XLOC_008688		Intergenic	ENSEMBL	764
p16110	0.346721	0.00370631	2.38904	down	4.93688	5.29191	5.14457	3.68203	3.6955	4.22654	0	TGATATCCAGGACATTATTCCACAGGAAAAGGTTAACAGGAAATCAAGATCGGCCCGCTC	ENST00000524022.1	8	+	31133111	31241795	2	31133111,31241672,	31133324,31241795,	ENSG00000253377.1	gene_id "ENSG00000253377.1"; transcript_id "ENST00000524022.1"; gene_type "lincRNA"; gene_status "NOVEL"; gene_name "RP11-566H8.3"; transcript_type "lincRNA"; transcript_status "KNOWN"; transcript_name "RP11-566H8.3-001"; level 2; tag "basic"; havana_gene "OTTHUMG00000163916.1"; havana_transcript "OTTHUMT00000376384.1";	ENST00000524022.1		Intergenic	ENSEMBL	336
p17954	0.346721	0.0104094	2.49023	down	6.87688	6.717	6.66887	5.13071	5.18138	6.00184	0	ATTGAAAGCTATTATTAACTGACAGCAAGGAGGCCCTTGGGAATTGGACACGGGATAGAG	TCONS_00018496	10	-	45571369	45572131	2	45571369,45572100,	45571666,45572131,	XLOC_008802	Gene_id=XLOC_008802;Gene_name=linc-C10orf25-1;Transcript_id=TCONS_00018496;Transcript_name=linc-C10orf25-1;	XLOC_008802		Intergenic	HumanLincRNACatalog	328
RNA143539|tRNA_456_68	0.346721	0.0115058	2.38479	down	12.5874	12.5515	12.8412	11.795	11.5328	10.8908	0	AGAAAAACCATTTCATAACTTTGTCAAAGTTAAATTATAGGCTAAATCCTATATATCTTA	RNA143539|tRNA_456_68													ftp://ftp.ensembl.org/pub/current/fasta/homo_sapiens/ncrna/Homo_sapiens.GRCh37.61.ncrna.fa.gz	NA
p13808	0.352697	0.0440862	2.55413	down	3.67628	4.34193	2.7974	2.01997	2.25976	2.47739	0	CACCCTACGTAAGTTGACATTTTGTACAGACTAGAAGAAATGTGTGGTATGAGATCAATA	ENST00000504436.1	5	+	101917071	101953293	2	101917071,101952899,	101917270,101953293,	ENSG00000250958.1	gene_id "ENSG00000250958.1"; transcript_id "ENST00000504436.1"; gene_type "lincRNA"; gene_status "NOVEL"; gene_name "LINC00492"; transcript_type "lincRNA"; transcript_status "KNOWN"; transcript_name "LINC00492-001"; level 2; tag "basic"; havana_gene "OTTHUMG00000162776.1"; havana_transcript "OTTHUMT00000370375.1";	TCONS_00009475;XLOC_004493;TCONS_00009476;XLOC_004494	LINC00492	Intergenic	ENSEMBL	593
p28593	0.348733	0.0220511	2.33321	down	4.49026	5.04495	4.24213	2.89632	3.64918	3.56489	0	CAAATTAAAATCTCAAAGTGAGTCAAAGCAACCAGAATTTCCCTTCCCAAGGAAAGTGCA	ASO2138	None	None	None	None	None	None	None	ASO2138	Accession=BC041470;Description=Homo sapiens, clone IMAGE:5222445, mRNA.	asoverlaps_658_1318			RNAdb	1318
p12533	0.346721	0.0121597	2.98203	down	5.9049	5.43209	5.75231	4.01652	3.59949	4.74439	0	TGGCTTCACCTTTCTTATGAAAATGCAACCACTAGTACTCTTCCAATAAAAGCTTTTCTC	ENST00000503140.1	4	-	175018905	175041668	4	175018905,175035191,175041047,175041569,	175018980,175035423,175041237,175041668,	ENSG00000248174.1	gene_id "ENSG00000248174.1"; transcript_id "ENST00000503140.1"; gene_type "processed_transcript"; gene_status "NOVEL"; gene_name "RP11-148L24.1"; transcript_type "processed_transcript"; transcript_status "KNOWN"; transcript_name "RP11-148L24.1-002"; level 2; havana_gene "OTTHUMG00000160745.2"; havana_transcript "OTTHUMT00000362084.1";	ENST00000503140.1		Intergenic	ENSEMBL	596
p6874	0.346721	0.010023	2.02471	down	4.33452	4.87488	4.31209	3.24531	3.63472	3.5883	0	CGTTAAGTTGGTCTGAAGTAGGGCAAAGGAACGATTATAGAATGTTTCAAAGGAAATGTG	ENST00000574252.1	17	-	43985035	43988145	2	43985035,43988100,	43985749,43988145,	ENSG00000262881.1	gene_id "ENSG00000262881.1"; transcript_id "ENST00000574252.1"; gene_type "antisense"; gene_status "NOVEL"; gene_name "RP11-669E14.4"; transcript_type "antisense"; transcript_status "KNOWN"; transcript_name "RP11-669E14.4-001"; level 2; tag "basic"; havana_gene "OTTHUMG00000178025.1"; havana_transcript "OTTHUMT00000440268.1";	ENST00000574252.1		Antisense	ENSEMBL	759
p12703	0.354729	0.0499142	2.58198	down	6.00902	5.24791	6.64912	4.17601	4.49464	5.12997	0	CCTACCATCAAGTTATTTAGCCTACCATCAAGTTCTTTGGACTACTTCTTAAAATTAAGC	ENST00000515623.1	4	+	45011556	45053669	6	45011556,45016168,45024763,45024900,45030370,45053506,	45011646,45016301,45024797,45025044,45030478,45053669,	ENSG00000248744.1	gene_id "ENSG00000248744.1"; transcript_id "ENST00000515623.1"; gene_type "lincRNA"; gene_status "NOVEL"; gene_name "RP11-362I1.1"; transcript_type "lincRNA"; transcript_status "KNOWN"; transcript_name "RP11-362I1.1-001"; level 2; tag "basic"; havana_gene "OTTHUMG00000160568.2"; havana_transcript "OTTHUMT00000367743.1";	ENST00000515623.1		Intergenic	ENSEMBL	672
p4106	0.351397	0.0421261	2.12632	down	7.23002	6.57379	7.07366	5.73316	5.41266	6.46657	0	AATCCCCCTGTTGGGAAGAGATATTATGGTTAAAATGGAGGCACTACTACAATTTAAGCA	ENST00000435885.1	13	-	100143536	100144751	2	100143536,100144557,	100143677,100144751,	ENSG00000225985.1	gene_id "ENSG00000225985.1"; transcript_id "ENST00000435885.1"; gene_type "antisense"; gene_status "NOVEL"; gene_name "RP11-214F16.3"; transcript_type "antisense"; transcript_status "KNOWN"; transcript_name "RP11-214F16.3-001"; level 2; tag "basic"; havana_gene "OTTHUMG00000017271.1"; havana_transcript "OTTHUMT00000045601.1";	ENCODE_2686_335		Antisense	ENSEMBL	335
p25184	0.348733	0.0221833	2.09939	down	7.3312	7.03915	7.5774	5.84094	6.19313	6.70377	0	CCACAACACAAGGACAGATTTTAGTCTCTTCATACAGTGGGATATTTCACAGCTATTAAA	NR_026714.2	20	-	25750233	25781927	4	25750233,25755745,25767380,25781455,	25754795,25755948,25767624,25781927,	FAM182B	ID=rna40150;Name=NR_026714.2;Parent=gene33228;Dbxref=GeneID:728882,Genbank:NR_026714.2,HGNC:34503;gbkey=misc_RNA;product=family with sequence similarity 182%2C member B%2C transcript variant 1;transcript_id=NR_026714.2|ID=gene33228;Name=FAM182B;Dbxref=GeneID:728882,HGNC:34503;description=family with sequence similarity 182%2C member B;gbkey=Gene;gene=FAM182B	UCSC:uc010zti.2		Intergenic	RefSeq	5481
p16478	0.346721	0.0108908	2.34613	down	5.57422	5.1378	5.50613	3.92811	3.94756	4.65163	0	GTTGCCTTTCTCACACCTTATTTTAATACTCAAGGTAAACCCTTCTGTACAACTTTAGAA	ENST00000569583.1	9	-	37078809	37079773	1	37078809,	37079773,	ENSG00000260100.1	gene_id "ENSG00000260100.1"; transcript_id "ENST00000569583.1"; gene_type "lincRNA"; gene_status "NOVEL"; gene_name "RP11-220I1.5"; transcript_type "lincRNA"; transcript_status "KNOWN"; transcript_name "RP11-220I1.5-001"; level 2; tag "basic"; havana_gene "OTTHUMG00000175668.1"; havana_transcript "OTTHUMT00000430764.1";	ENST00000569583.1		Intergenic	ENSEMBL	964
p9958	0.353041	0.0444758	2.01285	down	7.41293	7.38097	6.9431	6.29055	5.66691	6.75181	0	TTTCAGACCCTGTTCACACTCTCTTTGTCCATGGGCCCAGACACAGTCTTGTGCTGCTCC	ENST00000514072.1	2	+	113820096	113822959	2	113820096,113822491,	113820303,113822959,	ENSG00000249076.1	gene_id "ENSG00000249076.1"; transcript_id "ENST00000514072.1"; gene_type "processed_transcript"; gene_status "PUTATIVE"; gene_name "AC016724.8"; transcript_type "processed_transcript"; transcript_status "PUTATIVE"; transcript_name "AC016724.8-001"; level 2; tag "basic"; havana_gene "OTTHUMG00000153322.1"; havana_transcript "OTTHUMT00000330724.1";	ENST00000514072.1		Antisense	ENSEMBL	675
p9422	0.346721	0.0128744	3.19083	down	10.3951	9.92938	10.3387	8.44831	7.97402	9.21905	0	AATCCTTCTCTGATGATGGCTTAGAAAGCTGGAAGACACTCAACATTGAATCCTGGGGCT	ENST00000416080.1	2	-	173373756	173377238	3	173373756,173374330,173377061,	173374022,173374541,173377238,	ENSG00000225205.1	gene_id "ENSG00000225205.1"; transcript_id "ENST00000416080.1"; gene_type "antisense"; gene_status "NOVEL"; gene_name "AC093818.1"; transcript_type "antisense"; transcript_status "KNOWN"; transcript_name "AC093818.1-003"; level 2; tag "basic"; havana_gene "OTTHUMG00000154088.3"; havana_transcript "OTTHUMT00000333835.1";	ENST00000416080.1		Antisense	ENSEMBL	654
p38588_v4	0.34911	0.029674	2.21794	down	5.12084	5.4297	5.17087	3.43701	4.30305	4.53367	0	GCAACAAAAATGACATCTGCTAAGTAAGCCTACAAAATACTACTAAACAACACCAAACAC	ENST00000422074.2	13	-	88453290	88456063	3	88453290,88455264,88456028,	88453534,88455329,88456063,	ENSG00000223404.3	gene_id "ENSG00000223404.3"; transcript_id "ENST00000422074.2"; gene_type "lincRNA"; gene_status "NOVEL"; gene_name "LINC00397"; transcript_type "lincRNA"; transcript_status "KNOWN"; transcript_name "LINC00397-001"; level 2; havana_gene "OTTHUMG00000017169.3"; havana_transcript "OTTHUMT00000045418.2";			Intergenic	ENSEMBL	344
p33715	0.328765	4.43242e-05	4.86472	down	8.75886	8.62642	8.50965	6.16551	6.39661	6.48574	0	TTCTTTTTTCTTTCTTCCTTTCTTCCTTGGCCAAGAGAAGGGCTTACAGGCATGGACATG	NR_037939.1	7	-	27210209	27219880	2	27210209,27219264,	27211792,27219880,	HOXA10	ID=rna16154;Name=NR_037939.1;Parent=gene13507;Dbxref=GeneID:3206,Genbank:NR_037939.1,HGNC:5100,MIM:142957;gbkey=misc_RNA;product=homeobox A10%2C transcript variant 2;transcript_id=NR_037939.1|ID=gene13507;Name=HOXA10;Dbxref=GeneID:3206,HGNC:5100,MIM:142957;description=homeobox A10;gbkey=Gene;gene=HOXA10;gene_synonym=HOX1,HOX1.8,HOX1H,PL	UCSC:uc003syw.4		Antisense	RefSeq	2199
p17055	0.346721	0.0113755	2.75986	down	7.27475	7.6682	8.25715	6.565	5.99085	6.25046	0	AGAAGGTAGCACACTTCCAACATATCCTTCCGTCTTCCAAGATATAGTCCATACAACTTT	ENST00000579945.1	X	-	96783363	96819532	3	96783363,96788310,96819378,	96784065,96788428,96819532,	ENSG00000236256.4	gene_id "ENSG00000236256.4"; transcript_id "ENST00000579945.1"; gene_type "antisense"; gene_status "NOVEL"; gene_name "DIAPH2-AS1"; transcript_type "antisense"; transcript_status "KNOWN"; transcript_name "DIAPH2-AS1-003"; level 2; tag "basic"; havana_gene "OTTHUMG00000021989.2"; havana_transcript "OTTHUMT00000446471.1";	ENST00000579945.1	DIAPH2-AS1	Antisense	ENSEMBL	974
p7787	0.348681	0.0207603	2.24695	down	4.3238	3.92242	4.38157	2.63932	2.90385	3.58072	0	GAAGCAGAGTTCACTCTCCATTTATTTGTCTTCTTTGATATCTCTCAATAGAATGTTGCA	ENST00000323355.3	18	-	61747242	61816264	4	61747242,61765067,61765810,61816008,	61747636,61765226,61765874,61816264,	ENSG00000179676.6	gene_id "ENSG00000179676.6"; transcript_id "ENST00000323355.3"; gene_type "lincRNA"; gene_status "KNOWN"; gene_name "LINC00305"; transcript_type "lincRNA"; transcript_status "KNOWN"; transcript_name "LINC00305-001"; level 2; tag "basic"; havana_gene "OTTHUMG00000060637.2"; havana_transcript "OTTHUMT00000134071.2";	ENCODE_674_873	LINC00305	Intergenic	ENSEMBL	873
p7876	0.348681	0.0211135	4.13313	down	4.52017	5.10849	3.91413	2.71362	3.06744	1.62003	0	TGCTGAGCTTATGAAAAGAAAGCAACAAAAAACTGAATAGCCAATTCTAAAGGCCAAAAC	ENST00000577527.1	18	+	5463625	5480974	4	5463625,5467410,5479624,5480894,	5463833,5467579,5479745,5480974,	ENSG00000265316.1	gene_id "ENSG00000265316.1"; transcript_id "ENST00000577527.1"; gene_type "antisense"; gene_status "NOVEL"; gene_name "RP11-286N3.1"; transcript_type "antisense"; transcript_status "KNOWN"; transcript_name "RP11-286N3.1-001"; level 2; tag "basic"; havana_gene "OTTHUMG00000178868.1"; havana_transcript "OTTHUMT00000443697.1";	ENST00000577527.1		Antisense	ENSEMBL	578
p42891_v4	0.346721	0.0157809	2.13628	down	7.1135	7.74487	7.24648	6.23328	5.96155	6.62471	0	TGAGCACAAACGATGGAAAAAAGCACTTGGAAGACCTCTCAAGAGGAACAGCATGAGAGA	XR_429396.1	14	+	91080149	91091359	3	91080149,91087250,91091263,	91080171,91087411,91091359,	none					RefSeq	279
p22293	0.346721	0.0115839	2.05981	down	4.78835	4.56006	4.5625	3.47882	3.27773	4.02684	0	CTGAAATGCTGATTAAGCATTATGGGATTTAAGGTTTCCTGGCCAAGTCTGAGCTAAAAT	TCONS_00008455	4	-	28363939	28389444	3	28363939,28372321,28389342,	28364214,28372431,28389444,	XLOC_003917	Gene_id=XLOC_003917;Gene_name=linc-CCKAR-8;Transcript_id=TCONS_00008455;Transcript_name=linc-CCKAR-8;	XLOC_003917		Intergenic	HumanLincRNACatalog	487
p18600	0.346721	0.00849178	2.14306	down	6.06884	5.60052	6.10886	4.53215	4.86865	5.07841	0	GAGTAAAGACTGTTAGCAAGAAAGCCAGACTCATCTAGATTAGGACCACCAATGCCCCTT	TCONS_00020729	12	-	20387840	20417097	3	20387840,20399535,20417033,	20388052,20399565,20417097,	XLOC_010028	Gene_id=XLOC_010028;Gene_name=linc-PLCZ1-4;Transcript_id=TCONS_00020729;Transcript_name=linc-PLCZ1-4;	XLOC_010028		Intergenic	HumanLincRNACatalog	306
p15781	0.348944	0.0266023	2.46799	down	4.3269	3.75367	3.97835	2.44709	2.30679	3.39503	0	ATGCTTCTGACGATAGACCCTGCTTTCCTAATTGATCAAGAGATAAATAAGTGATTCCAG	ENST00000524269.1	8	-	77488785	77491580	2	77488785,77491377,	77488921,77491580,	ENSG00000253681.1	gene_id "ENSG00000253681.1"; transcript_id "ENST00000524269.1"; gene_type "antisense"; gene_status "NOVEL"; gene_name "RP11-115I9.1"; transcript_type "antisense"; transcript_status "KNOWN"; transcript_name "RP11-115I9.1-001"; level 1; tag "basic"; tag "exp_conf"; havana_gene "OTTHUMG00000164555.1"; havana_transcript "OTTHUMT00000379195.1";	ENST00000524269.1		Antisense	ENSEMBL	339
RNA95611|RNS_693_137	0.350435	0.0352755	2.38278	down	7.5332	8.53182	7.96226	6.28112	6.74732	7.2409	0	ACTGCAGGGTTGCAGCACAGACGAGCAGTTATAACTACTGACTTCGCATGCACCGCGTGC	RNA95611|RNS_693_137													http://research.imb.uq.edu.au/rnadb/NoncodingRNASearchV2.zip	NA
p27527	0.34911	0.0293099	2.01823	down	3.44607	3.79245	3.08449	2.33336	2.09192	2.85846	0	ACAGTGATCAGCTGGTTAAGTACAGTTAACCAGATGTCGTTTTAAAGGGCCAGATGGAAC	uc.116+	3	+	70566423	70566629	1	70566423,	70566629,	uc.116+	uc.116+	UCRs_428_206		Intergenic	UCR	206
p17728	0.346721	0.0125388	2.00342	down	3.34762	4.11076	3.63646	2.7722	2.75458	2.56065	0	CTTGAAAGCTAATTGAACAGTCATGCTTTGTTCTAATTATTCCTGGCTACCATTAAAGTG	TCONS_00001015	1	+	88928657	88931553	2	88928657,88930535,	88929066,88931553,	XLOC_000281	Gene_id=XLOC_000281;Gene_name=linc-PKN2-1;Transcript_id=TCONS_00001015;Transcript_name=linc-PKN2-1;	XLOC_000281		Intergenic	HumanLincRNACatalog	1427
p41766_v4	0.351281	0.0415642	2.59805	down	8.51051	7.8865	8.676	6.63579	6.53004	7.7749	0	GATATTTCCGTATCATTCCCCCAACCAGCTGGAAGTCCTCCACTGCTCTTGTGTAAAAAT	XR_428545.1	9	-	70958760	70965988	2	70958760,70965866,	70959144,70965988,	none					RefSeq	506
p4036	0.35077	0.0388354	2.0438	down	10.2351	9.93515	10.4561	9.02783	8.73981	9.76486	0	CACATCTGAACTGAGGTACCCTCCAAAGCCTGTTCCGTAAAATCAGCAAACAACTGACAG	ENST00000594428.1	13	-	47035079	47040141	2	47035079,47039977,	47035305,47040141,	ENSG00000231817.2	gene_id "ENSG00000231817.2"; transcript_id "ENST00000594428.1"; gene_type "lincRNA"; gene_status "NOVEL"; gene_name "RP11-189B4.6"; transcript_type "lincRNA"; transcript_status "KNOWN"; transcript_name "RP11-189B4.6-004"; level 2; havana_gene "OTTHUMG00000016875.2"; havana_transcript "OTTHUMT00000462213.1";	ENST00000594428.1		Intergenic	ENSEMBL	390
p5934	0.346721	0.0128166	2.07928	down	5.54579	5.25824	5.70939	4.12305	4.83655	4.38557	0	CTCCTTGTCACGAAAGCAAAAAACAAGATAGCATTAGAGTTCTGAGAACAGGATGTCATT	ENST00000567401.1	16	-	22621851	22623517	1	22621851,	22623517,	ENSG00000260973.1	gene_id "ENSG00000260973.1"; transcript_id "ENST00000567401.1"; gene_type "lincRNA"; gene_status "NOVEL"; gene_name "RP11-105C19.2"; transcript_type "lincRNA"; transcript_status "KNOWN"; transcript_name "RP11-105C19.2-001"; level 2; tag "basic"; havana_gene "OTTHUMG00000176839.1"; havana_transcript "OTTHUMT00000434000.1";	ENST00000567401.1		Intergenic	ENSEMBL	1666
RNA144146|snRNA_99_303	0.348944	0.0262616	2.06182	down	5.76689	5.66335	5.8286	4.43496	4.38483	5.30731	0	GAGCAACACAAAACAGTCTAAGACATGGATTATCTATGCTGTGAAATTAAATGTAGTGTC	RNA144146|snRNA_99_303													ftp://ftp.ensembl.org/pub/current/fasta/homo_sapiens/ncrna/Homo_sapiens.GRCh37.61.ncrna.fa.gz	NA
p17148	0.34911	0.0319658	2.23492	down	4.40475	5.36429	5.09088	3.824	4.15433	3.40091	0	TTCTTTCATTCAAAGACAGGACTTACATGAGCCTTCCTTTCTGCTGTTCCTTTTCTTAAA	ENST00000449605.1	X	+	21911717	21920026	2	21911717,21913078,	21912388,21920026,	ENSG00000231771.1	gene_id "ENSG00000231771.1"; transcript_id "ENST00000449605.1"; gene_type "lincRNA"; gene_status "NOVEL"; gene_name "RP11-147O5.1"; transcript_type "lincRNA"; transcript_status "KNOWN"; transcript_name "RP11-147O5.1-001"; level 2; tag "basic"; havana_gene "OTTHUMG00000021238.1"; havana_transcript "OTTHUMT00000056029.1";	ENCODE_3_7619;TCONS_00016971;XLOC_007942		Intergenic	ENSEMBL	7619
p21429	0.350581	0.0355645	2.7876	down	8.2463	8.11083	8.42634	6.40658	6.23248	7.70734	0	TCAACATCAGTGTACAGAGCTTTGGTGGACTTTGGATTGAGGTGGAAACTCCTTAGCCAA	TCONS_00028402	20	-	43766346	43767617	3	43766346,43767157,43767453,	43766538,43767315,43767617,	XLOC_013754	Gene_id=XLOC_013754;Gene_name=linc-WFDC12-1;Transcript_id=TCONS_00028402;Transcript_name=linc-WFDC12-1;	XLOC_013754		Intergenic	HumanLincRNACatalog	514
p23109	0.346721	0.00614205	2.25234	down	5.87848	5.73295	5.6714	4.3917	4.36188	5.01497	0	AAGTCCTCTTTGAGCAAAGACATGGAGTCCACATGAGCAAAGACATGGAGGAGAAAAACG	TCONS_00010833	5	+	172243601	172246862	2	172243601,172246484,	172243728,172246862,	XLOC_004636	Gene_id=XLOC_004636;Gene_name=linc-ERGIC1-1;Transcript_id=TCONS_00010833;Transcript_name=linc-ERGIC1-1;	XLOC_004636		Intergenic	HumanLincRNACatalog	505
p30260	0.351397	0.041817	2.93771	down	3.81046	5.06776	5.03689	2.46644	3.21588	3.56871	0	AGTAACTCTCGTGTTATTTGAATTAGGTAAAGCGTGTTCACATTTGGACAGCATTTATTC	uc004dbt.3	X	-	27193032	27417114	6	27193032,27204656,27283864,27354526,27416867,27417053,	27194501,27204774,27283928,27354610,27416954,27417114,	BC024027	proteinID=;alignID=uc004dbt.3;kgID=uc004dbt.3;mRNA=BC024027;spID=;refseq=;protAcc=;description=Homo sapiens cDNA clone IMAGE:4824334.;rfamAcc=;tRnaName=;	uc004dbt.3		Intergenic	UCSC	1883
p22336	0.346721	0.00979669	2.23576	down	6.71446	6.5862	6.51507	5.16468	5.23867	5.93009	0	TTTCAAAAAGAATGGTGCCAAGAACAGTGGAAGAGGGAACTTTTGTACTTTTATGAAAGT	TCONS_00008565	4	-	122484905	122486182	2	122484905,122486102,	122485864,122486182,	XLOC_004059	Gene_id=XLOC_004059;Gene_name=linc-QRFPR-1;Transcript_id=TCONS_00008565;Transcript_name=linc-QRFPR-1;	XLOC_004059		Intergenic	HumanLincRNACatalog	1039
p8988	0.350496	0.0354181	2.8284	down	4.64693	4.95497	3.4818	2.70611	2.67391	3.20373	0	TAGAGATTCTGATGAAACGACTCAAATGCTCAACGATATGGAGAAGGACCAAAGGTAATT	ENST00000412528.1	2	-	6868308	6871454	4	6868308,6869648,6870780,6871286,	6868379,6869738,6870875,6871454,	ENSG00000205837.3	gene_id "ENSG00000205837.3"; transcript_id "ENST00000412528.1"; gene_type "lincRNA"; gene_status "NOVEL"; gene_name "LINC00487"; transcript_type "lincRNA"; transcript_status "KNOWN"; transcript_name "LINC00487-003"; level 2; havana_gene "OTTHUMG00000151630.2"; havana_transcript "OTTHUMT00000323348.1";	ENCODE_2279_424	LINC00487	Intergenic	ENSEMBL	424
p11318	0.346721	0.00256663	2.74412	down	6.67716	6.03028	6.35142	4.87156	4.71886	5.09941	0	AAGAGTGTTTGGTTCCTGCTGTATTATCAATGCCTGTCAGTAAAACATAATGTTTAACAC	ENST00000432505.1	3	-	24141464	24144729	2	24141464,24144070,	24143037,24144729,	ENSG00000224074.3	gene_id "ENSG00000224074.3"; transcript_id "ENST00000432505.1"; gene_type "processed_transcript"; gene_status "NOVEL"; gene_name "LINC00691"; transcript_type "processed_transcript"; transcript_status "KNOWN"; transcript_name "LINC00691-002"; level 2; havana_gene "OTTHUMG00000155662.1"; havana_transcript "OTTHUMT00000341065.1";	NR_026834;RefSeq_1455_2241;TCONS_00005393;XLOC_003068	LINC00691	Intergenic	ENSEMBL	2232
p13271	0.346721	0.00425578	2.07977	down	4.9461	4.86922	4.88972	3.93019	3.50147	4.10411	0	GGTGGACGTCAATGAATACTAAACACTAATTGATCTGATACAGCCGTATGCACATACACA	ENST00000509405.1	5	-	87836664	87980622	4	87836664,87837852,87966853,87980474,	87836941,87837888,87966903,87980622,	ENSG00000245526.3	gene_id "ENSG00000245526.3"; transcript_id "ENST00000509405.1"; gene_type "lincRNA"; gene_status "KNOWN"; gene_name "LINC00461"; transcript_type "lincRNA"; transcript_status "KNOWN"; transcript_name "LINC00461-014"; level 2; havana_gene "OTTHUMG00000162632.3"; havana_transcript "OTTHUMT00000369812.1";	ENST00000509405.1	LINC00461	Intergenic	ENSEMBL	511
p10886	0.346924	0.0190615	2.56902	down	3.30055	3.98322	3.5504	2.15244	1.79113	2.80695	0	CCATCGAAGGAAAACCTTTATTTTGGCTGCTAACATTTGGAAACATTTAGAGAACAAACA	ENST00000432141.1	21	+	39578249	39580738	3	39578249,39578565,39580228,	39578454,39578710,39580738,	ENSG00000233316.3	gene_id "ENSG00000233316.3"; transcript_id "ENST00000432141.1"; gene_type "lincRNA"; gene_status "KNOWN"; gene_name "DSCR10"; transcript_type "lincRNA"; transcript_status "KNOWN"; transcript_name "DSCR10-001"; level 2; tag "basic"; havana_gene "OTTHUMG00000090611.1"; havana_transcript "OTTHUMT00000207199.1";	NR_027695;RefSeq_2946_860	DSCR10	Intergenic	ENSEMBL	860
p12076	0.346745	0.0178531	2.25889	down	4.97477	4.87106	5.46042	3.75119	3.62234	4.40589	0	GACGTGAAATTTCCCTGCTTCTGAAAACTTAATTTGATATTTTCTCTTACACACCAAGCA	ENST00000496247.1	3	+	168006340	168009016	2	168006340,168008927,	168006796,168009016,	ENSG00000241882.1	gene_id "ENSG00000241882.1"; transcript_id "ENST00000496247.1"; gene_type "processed_transcript"; gene_status "PUTATIVE"; gene_name "RP11-637O11.2"; transcript_type "processed_transcript"; transcript_status "PUTATIVE"; transcript_name "RP11-637O11.2-001"; level 2; tag "basic"; havana_gene "OTTHUMG00000158562.1"; havana_transcript "OTTHUMT00000351306.1";	ENST00000496247.1		Intergenic	ENSEMBL	545
RNA143230|tRNA_147_73	0.346924	0.0193632	2.06294	down	9.36656	8.873	8.51857	7.91251	7.64089	8.07063	0	GAGACCAGTTGATTAAGGTGTTTAGCTGTTAACTAAATTTTTGTGGGTTTGAATTCCATC	RNA143230|tRNA_147_73													ftp://ftp.ensembl.org/pub/current/fasta/homo_sapiens/ncrna/Homo_sapiens.GRCh37.61.ncrna.fa.gz	NA
p44029_v4	0.350581	0.0378872	2.30088	down	7.04079	6.55189	6.65293	5.18138	5.18257	6.2751	0	TGGTGAAACCCACAGAAACACCTGAAAAAACTCAAGCTGACTTCCACTGCGAAGGGAAAT	uc031pmm.1	1	-	47308766	47366147	12	47308766,47310203,47311335,47325325,47333618,47338915,47348609,47348843,47351127,47352922,47364514,47365929,	47308850,47310286,47311400,47325459,47333809,47339019,47348764,47348968,47351255,47352967,47364656,47366147,	CYP4Z2P	NR_002788	Homo sapiens cytochrome P450, family 4, subfamily Z, polypeptide 2, pseudogene (CYP4Z2P), non-coding RNA.			UCSC	1474
p5468	0.347154	0.0197212	2.033	down	5.47796	5.07777	4.93937	4.57265	3.86044	3.9912	0	GTGGAGCATTAACCAAAACCAACCTTTGTCAAGGCATAAAATATATCACAATAAACACCA	ENST00000553822.1	15	+	27866679	27874435	3	27866679,27867537,27874317,	27866823,27867611,27874435,	ENSG00000258594.1	gene_id "ENSG00000258594.1"; transcript_id "ENST00000553822.1"; gene_type "lincRNA"; gene_status "NOVEL"; gene_name "RP11-30G8.2"; transcript_type "lincRNA"; transcript_status "KNOWN"; transcript_name "RP11-30G8.2-001"; level 2; tag "basic"; havana_gene "OTTHUMG00000171831.1"; havana_transcript "OTTHUMT00000415256.1";	ENST00000553822.1		Intergenic	ENSEMBL	336
p3353	0.346721	0.00291205	2.22645	down	5.12587	5.17359	5.38365	3.787	4.09375	4.33814	0	TTGTGGTAGATTCCCAGGTTTCTATTGGAAACAGACAAACCACCTCTTCTTCTCTCTGCT	ENST00000551905.1	12	-	104048557	104051773	2	104048557,104051384,	104048646,104051773,	ENSG00000257737.1	gene_id "ENSG00000257737.1"; transcript_id "ENST00000551905.1"; gene_type "antisense"; gene_status "NOVEL"; gene_name "RP11-341G23.2"; transcript_type "antisense"; transcript_status "KNOWN"; transcript_name "RP11-341G23.2-001"; level 2; tag "basic"; havana_gene "OTTHUMG00000170057.1"; havana_transcript "OTTHUMT00000407095.1";	ENST00000551905.1		Antisense	ENSEMBL	478
p22746	0.348733	0.021631	2.02156	down	6.03229	5.3205	5.59267	4.40375	4.49696	4.99835	0	GGGTTGTCTGTCTTAGAAAGGATCTCTCATTCCAAACCTTAAAACTATTCTCCTAATAAT	TCONS_00010370	5	-	71393373	71395047	2	71393373,71394584,	71394264,71395047,	XLOC_004872	Gene_id=XLOC_004872;Gene_name=linc-GTF2H2-4;Transcript_id=TCONS_00010370;Transcript_name=linc-GTF2H2-4;	XLOC_004872		Intergenic	HumanLincRNACatalog	1354
p11478	0.346721	0.00892961	2.92643	down	5.39742	5.2276	4.96341	3.17387	3.56337	4.20376	0	AGAGAAGAAAGGAAATTTGGTTTGATGTTATCAGTTTTGATTTGCTAACCCAAAAGGTCC	ENST00000462528.1	3	-	117401760	117407708	2	117401760,117407353,	117401846,117407708,	ENSG00000241213.1	gene_id "ENSG00000241213.1"; transcript_id "ENST00000462528.1"; gene_type "processed_transcript"; gene_status "NOVEL"; gene_name "RP11-768G7.2"; transcript_type "retained_intron"; transcript_status "KNOWN"; transcript_name "RP11-768G7.2-003"; level 2; havana_gene "OTTHUMG00000159344.1"; havana_transcript "OTTHUMT00000354808.1";	TCONS_00005820;XLOC_003222		Intergenic	ENSEMBL	441
p34208_v4	0.346721	0.00910416	3.8666	down	11.0432	9.78716	10.148	8.54904	8.55178	8.0243	0	GAGGCTTTGGAGGTGCCAGCGGTAGTAAACGAGCGGATTGCAAGTTGCTTCTTCTCGAGG	ENST00000535914.1	12	-	26278087	26279017	3	26278087,26278438,26278915,	26278345,26278514,26279017,	ENSG00000256894.1	gene_id "ENSG00000256894.1"; transcript_id "ENST00000535914.1"; gene_type "antisense"; gene_status "NOVEL"; gene_name "RP11-283G6.3"; transcript_type "antisense"; transcript_status "KNOWN"; transcript_name "RP11-283G6.3-001"; level 2; tag "basic"; havana_gene "OTTHUMG00000169175.1"; havana_transcript "OTTHUMT00000402723.1";	ENST00000535914.1		Antisense	ENSEMBL	436
p15687	0.346721	0.00370219	3.19593	down	4.79766	4.45857	4.41316	2.58898	2.67888	3.37282	0	CCGGAAAGACTCCAATTTGACCTTAGTGCTTAATCCCTTTAGTTTGAAGTGTAGCTTAAA	ENST00000521359.1	8	-	49428411	49429649	2	49428411,49429617,	49428916,49429649,	ENSG00000253140.1	gene_id "ENSG00000253140.1"; transcript_id "ENST00000521359.1"; gene_type "lincRNA"; gene_status "NOVEL"; gene_name "RP11-567J20.3"; transcript_type "lincRNA"; transcript_status "KNOWN"; transcript_name "RP11-567J20.3-001"; level 2; tag "basic"; havana_gene "OTTHUMG00000164197.1"; havana_transcript "OTTHUMT00000377770.1";	ENST00000521359.1		Intergenic	ENSEMBL	537
p36554_v4	0.346721	0.00736819	4.79029	down	8.1043	8.53865	8.15192	5.93414	5.30074	6.77966	0	CTAGCAGCGGCCGAGCTTACAGAGAGAAGGCCAAAGTCAAGCCCGTTTGCCAACCTGCAT	ENST00000519694.1	7	+	27208237	27210992	2	27208237,27210926,	27208612,27210992,	ENSG00000253187.2	gene_id "ENSG00000253187.2"; transcript_id "ENST00000519694.1"; gene_type "antisense"; gene_status "NOVEL"; gene_name "HOXA-AS4"; transcript_type "antisense"; transcript_status "KNOWN"; transcript_name "HOXA-AS4-002"; level 1; tag "basic"; tag "exp_conf"; havana_gene "OTTHUMG00000158203.3"; havana_transcript "OTTHUMT00000350395.1";	ENST00000519694.1	HOXA-AS4	Antisense	ENSEMBL	441
p11520	0.349241	0.0335117	2.86621	down	11.0393	10.8297	10.3358	9.16022	8.50085	9.9862	0	AAATAAATATAGGGTGGGGCCTGAATATGCTGGGTGATGAGAGACAACAGAATTTGGACA	ENST00000462176.2	3	-	136677966	136701038	2	136677966,136700904,	136678394,136701038,	ENSG00000249407.1	gene_id "ENSG00000249407.1"; transcript_id "ENST00000462176.2"; gene_type "antisense"; gene_status "NOVEL"; gene_name "IL20RB-AS1"; transcript_type "antisense"; transcript_status "KNOWN"; transcript_name "IL20RB-AS1-001"; level 1; tag "basic"; tag "exp_conf"; havana_gene "OTTHUMG00000163091.1"; havana_transcript "OTTHUMT00000371661.1";	ENST00000462176.2	IL20RB-AS1	Antisense	ENSEMBL	562
p7868	0.346721	0.00323323	2.40084	down	4.54509	4.36146	4.42596	3.19167	3.5093	2.84093	0	AAGAAGTAAGAAAAAATCAGAAGATACACTTCCAAGCCTCATGAAGCATTAACAGAACCT	ENST00000584896.1	18	+	5159330	5171025	3	5159330,5163679,5170668,	5159403,5163796,5171025,	ENSG00000266153.1	gene_id "ENSG00000266153.1"; transcript_id "ENST00000584896.1"; gene_type "lincRNA"; gene_status "NOVEL"; gene_name "RP11-190I17.2"; transcript_type "lincRNA"; transcript_status "KNOWN"; transcript_name "RP11-190I17.2-001"; level 2; tag "basic"; havana_gene "OTTHUMG00000178450.1"; havana_transcript "OTTHUMT00000442050.1";	ENST00000584896.1		Intergenic	ENSEMBL	547
p9725	0.346721	0.00470086	2.4669	down	5.29645	4.58262	4.7468	3.64992	3.64704	3.42081	0	GTAGAGGTCACTAAAACCAACAAATCAACCAGTATTGCAGATTATCCAATTAGCAAAGAT	ENST00000435713.1	2	+	31752011	31788534	3	31752011,31752619,31788143,	31752115,31752770,31788534,	ENSG00000228563.1	gene_id "ENSG00000228563.1"; transcript_id "ENST00000435713.1"; gene_type "lincRNA"; gene_status "NOVEL"; gene_name "AL133247.2"; transcript_type "lincRNA"; transcript_status "KNOWN"; transcript_name "AL133247.2-001"; level 1; tag "basic"; tag "exp_conf"; havana_gene "OTTHUMG00000152058.1"; havana_transcript "OTTHUMT00000325125.1";	ENST00000435713.1	AL133247.2	Intergenic	ENSEMBL	646
p17201	0.351397	0.0422856	2.19734	down	7.609	8.17835	8.27113	6.97699	6.27862	7.3956	0	TCTGGAAGTTTCTAGTCTCACAAAAAGGAAGACCAGGGAGGCCCTTAAGAAAATATAGCA	ENST00000399711.1	X	+	68399399	68429767	5	68399399,68421319,68424174,68424733,68428094,	68399488,68421475,68424292,68424870,68429767,	ENSG00000215162.1	gene_id "ENSG00000215162.1"; transcript_id "ENST00000399711.1"; gene_type "lincRNA"; gene_status "KNOWN"; gene_name "LINC00269"; transcript_type "lincRNA"; transcript_status "KNOWN"; transcript_name "LINC00269-001"; level 2; tag "basic"; havana_gene "OTTHUMG00000021754.2"; havana_transcript "OTTHUMT00000057035.2";	ENST00000399711.1	LINC00269	Intergenic	ENSEMBL	2173
p22292	0.348944	0.0233688	2.4894	down	5.10069	4.64887	4.1284	2.91603	3.27446	3.74009	0	CTATGTTGCTCTGATTCAAAGTTAATGATACAGTCTTCATGTTTCTGTGCTTGTTCCTCT	TCONS_00008454	4	-	28345392	28395901	4	28345392,28372321,28394825,28395817,	28345514,28372431,28394972,28395901,	XLOC_003917	Gene_id=XLOC_003917;Gene_name=linc-CCKAR-8;Transcript_id=TCONS_00008454;Transcript_name=linc-CCKAR-8;	XLOC_003917		Intergenic	HumanLincRNACatalog	463
p37579_v4	0.348944	0.0250579	2.00045	down	6.50684	6.55933	7.3325	5.81104	5.61375	5.9729	0	CAGACATCAAGACTGTTGAAATGAGGGGAAGGGATCTGAATTCCCAAAAGAATGTCAAAT	ENST00000504520.2	4	-	83814161	83822113	5	83814161,83816844,83819141,83821229,83821486,	83816000,83816927,83819215,83821376,83822113,	ENSG00000251022.2	gene_id "ENSG00000251022.2"; transcript_id "ENST00000504520.2"; gene_type "antisense"; gene_status "NOVEL"; gene_name "THAP9-AS1"; transcript_type "antisense"; transcript_status "KNOWN"; transcript_name "THAP9-AS1-001"; level 2; tag "basic"; havana_gene "OTTHUMG00000160729.2"; havana_transcript "OTTHUMT00000361931.2";			Antisense	ENSEMBL	2770
p26812	0.35077	0.0393505	2.44353	down	5.36231	4.64975	4.89376	3.91124	2.94992	4.17775	0	TGGATGGTTATTCTTAAATTCAACAGTGTACTCATGCATAACGCTCTCTCCTATTGGAAA	HIT000395606	4	-	93181517	93181902	1	93181517,	93181902,	HIX0094621	None	H-InvDB_1299_386		Intergenic	H-InvDB	385
p9554	0.346721	0.0139932	2.66757	down	4.34477	4.60262	4.39285	2.49471	3.63181	2.96714	0	CAAGTGAGGTAACACTCAATGTTGGCTATGAGTATTCTATCGATAAATCTAATGTAGGTA	ENST00000425192.1	2	-	224830417	224832423	2	224830417,224832198,	224830621,224832423,	ENSG00000228802.1	gene_id "ENSG00000228802.1"; transcript_id "ENST00000425192.1"; gene_type "antisense"; gene_status "NOVEL"; gene_name "AC073641.2"; transcript_type "antisense"; transcript_status "KNOWN"; transcript_name "AC073641.2-001"; level 1; tag "basic"; tag "exp_conf"; havana_gene "OTTHUMG00000153359.1"; havana_transcript "OTTHUMT00000330870.1";	ENST00000425192.1		Antisense	ENSEMBL	429
p1333	0.35077	0.0394599	2.48858	down	7.42538	6.74611	7.76468	6.2671	5.36339	6.3597	0	TTGGAGAGCCTCAGAGACAAGAAAAGGAAAGTGAGAAGAGATAAGGCATCCTTCCTTGAG	ENST00000458139.1	1	+	201867227	201869106	3	201867227,201868300,201868857,	201867404,201868474,201869106,	ENSG00000223774.1	gene_id "ENSG00000223774.1"; transcript_id "ENST00000458139.1"; gene_type "antisense"; gene_status "NOVEL"; gene_name "RP11-307B6.3"; transcript_type "antisense"; transcript_status "KNOWN"; transcript_name "RP11-307B6.3-002"; level 2; tag "basic"; havana_gene "OTTHUMG00000035808.1"; havana_transcript "OTTHUMT00000087100.1";	ENST00000458139.1		Antisense	ENSEMBL	600
p1218	0.346721	0.000887206	7.79992	down	10.261	10.1116	9.46227	7.14768	6.53395	7.26286	0	GAAGTTTGGATGTGATTGCTCTGAACAAGCTGCTTTGCCACAATAAATATTTTCAAGTTT	ENST00000444515.1	1	+	152627952	152629280	3	152627952,152628786,152629075,	152628023,152628812,152629280,	ENSG00000176075.6	gene_id "ENSG00000176075.6"; transcript_id "ENST00000444515.1"; gene_type "lincRNA"; gene_status "KNOWN"; gene_name "LINC00302"; transcript_type "lincRNA"; transcript_status "KNOWN"; transcript_name "LINC00302-001"; level 2; tag "dotter_confirmed"; tag "non_canonical_conserved"; tag "basic"; havana_gene "OTTHUMG00000012386.2"; havana_transcript "OTTHUMT00000034506.2";	TCONS_00000313;XLOC_000411	LINC00302	Intergenic	ENSEMBL	302
p44288_v4	0.348944	0.0260148	2.20407	down	8.43393	7.64399	7.58279	6.37985	6.8982	6.96215	0	GCAATGCTTACAGTAGATGTCTCACACAGAACAATACAAACATGTAAAAAATCTTTCACC	uc031tdw.1	9	+	46687556	46746820	4	46687556,46698074,46744176,46745367,	46688114,46698184,46744280,46746820,	KGFLP1	NR_047527	Homo sapiens fibroblast growth factor 7 pseudogene (KGFLP1), transcript variant 1, non-coding RNA.			UCSC	2225
p20373	0.354588	0.0488774	2.18825	down	4.86788	4.9831	4.79841	4.29629	2.97287	3.9909	0	TCCTTATACTTCCCATTACCTGGAAGCAGTAAGAATGTTGGAATGACATAGTAAAGGTTC	TCONS_00026398	18	-	7508431	7509419	3	7508431,7508969,7509139,	7508885,7509053,7509419,	XLOC_012749	Gene_id=XLOC_012749;Gene_name=linc-LAMA1-7;Transcript_id=TCONS_00026398;Transcript_name=linc-LAMA1-7;	XLOC_012749		Intergenic	HumanLincRNACatalog	818
p13775	0.346721	0.00882368	2.34444	down	7.34875	7.68326	7.28128	6.29264	5.78257	6.55036	0	CTCTAAACATGAATATGCCTTTGGGGGAAGACAGAAGAACATGGAAGCCATGTGAAAAAA	ENST00000508521.1	5	+	88238903	88371148	4	88238903,88243952,88261657,88370912,	88238939,88244032,88261732,88371148,	ENSG00000248309.1	gene_id "ENSG00000248309.1"; transcript_id "ENST00000508521.1"; gene_type "processed_transcript"; gene_status "NOVEL"; gene_name "CTC-454M9.1"; transcript_type "processed_transcript"; transcript_status "KNOWN"; transcript_name "CTC-454M9.1-013"; level 2; havana_gene "OTTHUMG00000162630.2"; havana_transcript "OTTHUMT00000370013.1";	ENST00000508521.1	CTC-454M9.1	Intergenic	ENSEMBL	427
p36339_v4	0.348944	0.0253112	2.17807	down	7.97912	7.51166	7.99911	6.43656	6.4164	7.26778	0	TAGGACCAGAGAAGTAGTGTTGGAAGTGAGCATTTCTAGGTGCAGACGAGGCATTTGGGG	NR_047004.1	13	-	91779866	91863952	4	91779866,91783476,91846267,91863883,	91780112,91783661,91846334,91863952,	LINC00379	ID=rna28715;Name=NR_047004.1;Parent=gene24128;Dbxref=GeneID:100874150,Genbank:NR_047004.1,HGNC:42705;gbkey=misc_RNA;product=long intergenic non-protein coding RNA 379;transcript_id=NR_047004.1|ID=gene24128;Name=LINC00379;Dbxref=GeneID:100874150,HGNC:42705;description=long intergenic non-protein coding RNA 379;gbkey=Gene;gene=LINC00379	NR_047004.1		Intergenic	RefSeq	567
p34065_v4	0.354729	0.0495819	2.04161	down	12.1587	11.6552	12.1796	10.6055	10.6768	11.6221	0	GATGATGAAGACTTGAGTGTTGCTACTAAGGCCATGGTGTGTGATGTTCCCCATCCTGTG	ENST00000430699.1	1	+	143347969	143376699	11	143347969,143350672,143355261,143357972,143360307,143361976,143364848,143364968,143370994,143375109,143376649,	143348110,143350708,143355292,143358042,143360503,143362058,143364877,143365041,143371065,143375273,143376699,	ENSG00000242569.1	gene_id "ENSG00000242569.1"; transcript_id "ENST00000430699.1"; gene_type "lincRNA"; gene_status "NOVEL"; gene_name "BX004987.3"; transcript_type "lincRNA"; transcript_status "KNOWN"; transcript_name "BX004987.3-003"; level 2; havana_gene "OTTHUMG00000013469.1"; havana_transcript "OTTHUMT00000037544.1";	ENCODE_595_943	BX004987.3	Intergenic	ENSEMBL	943
p20088	0.35077	0.0392668	2.02076	down	6.00801	5.49101	5.28125	4.5531	4.14513	5.03735	0	ACTGGAGAGTAACACAAATGGCCAATTGTCCTAATAGCCACCATGGATTGGATGGATGCT	TCONS_00024482	16	+	79804336	79832527	3	79804336,79831387,79832335,	79804424,79831627,79832527,	XLOC_011797	Gene_id=XLOC_011797;Gene_name=linc-DYNLRB2-3;Transcript_id=TCONS_00024482;Transcript_name=linc-DYNLRB2-3;	XLOC_011797		Intergenic	HumanLincRNACatalog	520
p1177	0.34911	0.0285967	2.47337	down	6.14567	6.45958	5.86981	4.32147	4.71897	5.51519	0	CGGTAAAAGTTCTTTGGCAGCAAGCATCAGAAACCAAATGTAACAACTTTAAGCTAAAAA	ENST00000426504.1	1	+	147249699	147261065	2	147249699,147260719,	147249833,147261065,	ENSG00000234190.1	gene_id "ENSG00000234190.1"; transcript_id "ENST00000426504.1"; gene_type "lincRNA"; gene_status "KNOWN"; gene_name "RP11-433J22.3"; transcript_type "lincRNA"; transcript_status "KNOWN"; transcript_name "RP11-433J22.3-001"; level 2; tag "basic"; havana_gene "OTTHUMG00000042020.1"; havana_transcript "OTTHUMT00000100086.1";	ENCODE_1907_480;TCONS_00000297;XLOC_000387		Intergenic	ENSEMBL	480
p4929	0.346721	0.0127838	2.35476	down	2.6654	3.39939	2.69417	1.70898	1.9473	1.39592	0	TTACCTAGATACCTCCGTCTTCTGGAAAACCCCAAAAAGACCAGTAGACGAATCAGGAAG	ENST00000554071.1	14	+	90042559	90043821	1	90042559,	90043821,	ENSG00000259073.1	gene_id "ENSG00000259073.1"; transcript_id "ENST00000554071.1"; gene_type "processed_transcript"; gene_status "PUTATIVE"; gene_name "FOXN3-AS2"; transcript_type "processed_transcript"; transcript_status "PUTATIVE"; transcript_name "FOXN3-AS2-001"; level 2; tag "basic"; havana_gene "OTTHUMG00000170974.1"; havana_transcript "OTTHUMT00000411018.1";	NR_024620;RefSeq_2528_1261	FOXN3-AS2	Intronic	ENSEMBL	1262
p18684	0.346721	0.00157728	2.14113	down	5.8941	5.96333	5.72605	4.59811	4.68144	5.00881	0	GAAAATGAAGCAGCTTATGGAACAGAAGGTAAAGCTGGAGAAGTAGGATTGGAGCATCTG	TCONS_00020905	12	-	106136547	106149079	2	106136547,106148961,	106136683,106149079,	XLOC_010184	Gene_id=XLOC_010184;Gene_name=linc-APPL2-2;Transcript_id=TCONS_00020905;Transcript_name=linc-APPL2-2;	XLOC_010184		Intergenic	HumanLincRNACatalog	254
p21585	0.346721	0.00596387	2.08298	down	3.49756	3.40551	3.51731	2.18324	2.25754	2.80365	0	GTTTCTCTCTTAGAGTATGATGAAAAGAGGATTGGTTGTAAGAGACCTGGCTGCAAGGCT	TCONS_00028580	20	+	59658195	59658897	2	59658195,59658381,	59658231,59658897,	XLOC_013594	Gene_id=XLOC_013594;Gene_name=linc-CDH4-1;Transcript_id=TCONS_00028580;Transcript_name=linc-CDH4-1;	XLOC_013594		Intergenic	HumanLincRNACatalog	552
p10011	0.346721	0.0012904	2.52209	down	5.30323	5.10902	5.23071	4.15818	3.6197	3.86121	0	CATTCTCATTTTGTCTGGCTCTAAACTACTGTCTCAAGAAAGCTGCAAATATTTGAAAGT	ENST00000450509.1	2	+	133418098	133424563	2	133418098,133424244,	133418153,133424563,	ENSG00000230065.1	gene_id "ENSG00000230065.1"; transcript_id "ENST00000450509.1"; gene_type "antisense"; gene_status "NOVEL"; gene_name "AC010974.3"; transcript_type "antisense"; transcript_status "KNOWN"; transcript_name "AC010974.3-001"; level 1; tag "basic"; tag "exp_conf"; havana_gene "OTTHUMG00000153645.1"; havana_transcript "OTTHUMT00000331957.1";	ENST00000450509.1		Antisense	ENSEMBL	374
RNA144134|snRNA_87_309	0.346721	0.0104671	2.25328	down	6.44021	6.75629	6.54711	5.35306	5.02324	5.85123	0	AGACTGCAAATTAATTAGTTAGGCATACATCACAAGAAGTTAGAAAAAGAATAGCAAAAT	RNA144134|snRNA_87_309													ftp://ftp.ensembl.org/pub/current/fasta/homo_sapiens/ncrna/Homo_sapiens.GRCh37.61.ncrna.fa.gz	NA
p40130_v4	0.346721	0.0151865	2.26206	down	3.87408	3.7068	3.45643	2.29575	2.18614	3.02251	0	AGGCAAGCTTTTCAGCTGACTTAAGGCAGTGGACTTACATTGGGTTTTAAAAATTGATGC	XR_427354.1	3	-	81395356	81400135	3	81395356,81395648,81400110,	81395373,81395706,81400135,	none					RefSeq	100
p19097	0.35077	0.0396814	2.70738	down	6.37365	6.61043	6.74798	4.69667	4.6541	6.07061	0	AAAGTTATGCAGAAGTTATGTTTCCTTGTGTCCATTTGCCCAGCGCTGGAATCTGTGGAG	TCONS_00022087	13	-	95357953	95359564	2	95357953,95358390,	95358215,95359564,	XLOC_010695	Gene_id=XLOC_010695;Gene_name=linc-TGDS-1;Transcript_id=TCONS_00022087;Transcript_name=linc-TGDS-1;	XLOC_010695		Intergenic	HumanLincRNACatalog	1436
p22711	0.34911	0.0286894	2.14247	down	5.86393	5.05977	5.27866	3.85312	4.50947	4.54193	0	CTGCACAAACCATTGGTGACAATGAGAACCACTCTATATAGTTTTACTGACTTTGGATTC	TCONS_00010328	5	-	50671223	50672526	2	50671223,50672368,	50671497,50672526,	XLOC_004816	Gene_id=XLOC_004816;Gene_name=linc-EMB-6;Transcript_id=TCONS_00010328;Transcript_name=linc-EMB-6;	XLOC_004816		Intergenic	HumanLincRNACatalog	432
p19316	0.346721	0.00598545	2.23237	down	5.26293	5.77246	5.07122	4.10755	4.20929	4.31404	0	GTTGTTTACAAAGGATGAGCACAAGGCCTTTTGGATAACCTGATAAGCCCTGCAACTCCT	TCONS_00022749	14	-	54651914	54654999	3	54651914,54654145,54654947,	54652148,54654254,54654999,	XLOC_011029	Gene_id=XLOC_011029;Gene_name=linc-BMP4-1;Transcript_id=TCONS_00022749;Transcript_name=linc-BMP4-1;	XLOC_011029		Intergenic	HumanLincRNACatalog	395
p1568	0.346721	0.00118787	3.35935	down	8.46904	8.49056	8.50005	6.75372	6.36341	7.09798	0	ACATTTGTGGAAGACGGAGTGTGTTTCCATTATCCTTTCAGAGTTTGCAAACGAGGCGGT	ENST00000456722.1	10	-	45086655	45097552	2	45086655,45097397,	45087232,45097552,	ENSG00000234580.1	gene_id "ENSG00000234580.1"; transcript_id "ENST00000456722.1"; gene_type "lincRNA"; gene_status "NOVEL"; gene_name "RP11-733D4.1"; transcript_type "lincRNA"; transcript_status "KNOWN"; transcript_name "RP11-733D4.1-001"; level 2; tag "basic"; havana_gene "OTTHUMG00000018058.1"; havana_transcript "OTTHUMT00000047743.1";	ENCODE_977_732;TCONS_00017965;XLOC_008796		Intergenic	ENSEMBL	732
RNA95960|RNS_1042_91	0.346721	0.0083642	2.29062	down	4.04028	3.41225	3.61986	2.45479	2.23401	2.79638	0	GGTTCTAGGTTCAAATTGGAACATTAAAGGTTTTGATGAGTTCTCAGAGGCTAAGACTAT	RNA95960|RNS_1042_91													http://research.imb.uq.edu.au/rnadb/NoncodingRNASearchV2.zip	NA
p21620	0.346721	0.00948474	3.11994	down	4.37193	4.62758	3.96052	2.23154	2.57513	3.2288	0	ACCACCGTTTGCACAAGCCTAACCCTTCTTGATCAAAGACAAATCAAAATCCCAAGGAGA	TCONS_00029141	21	-	40447035	40450266	2	40447035,40450236,	40449756,40450266,	XLOC_014082	Gene_id=XLOC_014082;Gene_name=linc-ERG-9;Transcript_id=TCONS_00029141;Transcript_name=linc-ERG-9;	XLOC_014082		Intergenic	HumanLincRNACatalog	2751
p5682	0.346721	0.00941516	2.06489	down	9.88576	9.92811	9.86422	8.73164	8.53182	9.27643	0	ACGTCAATATTATTGCCTCCTGCATCCCTGCCTGTTTATTTGGAGATGAAAAGCGCCCTA	ENST00000557799.1	15	+	77952393	77960416	3	77952393,77959301,77960012,	77952525,77959428,77960416,	ENSG00000259281.1	gene_id "ENSG00000259281.1"; transcript_id "ENST00000557799.1"; gene_type "antisense"; gene_status "NOVEL"; gene_name "CTD-2632K10.1"; transcript_type "antisense"; transcript_status "KNOWN"; transcript_name "CTD-2632K10.1-001"; level 2; tag "basic"; havana_gene "OTTHUMG00000172627.1"; havana_transcript "OTTHUMT00000419535.1";	ENST00000557799.1	CTD-2632K10.1	Antisense	ENSEMBL	663
p12413	0.346721	0.00561879	2.1416	down	5.13014	4.73209	4.80211	3.68891	3.57404	4.10531	0	TCGCAGGTACTACTAGTTCCAATACTCATTGACTTTGTAACAACTGGTATATTAGCTACA	ENST00000511590.2	4	-	113801453	113803486	2	113801453,113803173,	113802014,113803486,	ENSG00000251126.2	gene_id "ENSG00000251126.2"; transcript_id "ENST00000511590.2"; gene_type "processed_transcript"; gene_status "PUTATIVE"; gene_name "RP11-119H12.6"; transcript_type "processed_transcript"; transcript_status "PUTATIVE"; transcript_name "RP11-119H12.6-001"; level 1; tag "basic"; tag "exp_conf"; havana_gene "OTTHUMG00000161563.2"; havana_transcript "OTTHUMT00000365314.2";	ENST00000511590.2		Intronic	ENSEMBL	874
p12657	0.348944	0.0226476	2.00616	down	6.55819	6.60743	6.09347	4.97235	5.70939	5.56404	0	ACCTAATGCATAGTGACAGAGAGCAGATGAAAGATTACTTGGGATGAGGGTGTCATGAAG	ENST00000512873.1	4	+	27219100	27283847	6	27219100,27229002,27232985,27278486,27279794,27281891,	27219185,27229119,27233143,27278915,27279851,27283847,	ENSG00000249699.1	gene_id "ENSG00000249699.1"; transcript_id "ENST00000512873.1"; gene_type "lincRNA"; gene_status "NOVEL"; gene_name "RP11-415C15.2"; transcript_type "lincRNA"; transcript_status "KNOWN"; transcript_name "RP11-415C15.2-001"; level 2; tag "basic"; havana_gene "OTTHUMG00000161689.1"; havana_transcript "OTTHUMT00000365728.1";	TCONS_00007495;XLOC_003484		Intergenic	ENSEMBL	2802
p33937	0.351166	0.0411636	2.68079	down	8.12227	7.71943	7.37684	6.05726	5.74039	7.15292	0	ACGAGTCCAAGGCACATATCCACTGCTCGGTGAAAGCAGAGAACTCGGTGGCGGCCAAAT	LIT3478	None	None	None	None	None	None	None	LIT3478	Accession=AY927450;Description=Homo sapiens mRNA sequence	CombinedLit_262_675		Antisense	RNAdb	675
p22863	0.346721	0.00766911	2.02872	down	6.60383	7.18336	7.13663	6.10183	5.79873	5.96155	0	TCCCCAGCACTCAATTTATGGAAGACCATTTCTCTTCTCATGACACATGTCCTCATGTTG	TCONS_00011107	5	-	180253931	180258806	2	180253931,180258724,	180254267,180258806,	XLOC_005110	Gene_id=XLOC_005110;Gene_name=linc-MGAT1-2;Transcript_id=TCONS_00011107;Transcript_name=linc-MGAT1-2;	XLOC_005110		Intergenic	HumanLincRNACatalog	418
p9537	0.346721	0.00847295	2.09054	down	6.8517	7.4671	7.52076	6.24149	6.11974	6.28669	0	TAAAAAGGATAAGAAAGTGGTGCATTCCAGTGTCTTCCTGTTCTCTGTTGCAGAGAGCCA	ENST00000438978.1	2	-	217351493	217363469	2	217351493,217363329,	217352103,217363469,	ENSG00000232485.2	gene_id "ENSG00000232485.2"; transcript_id "ENST00000438978.1"; gene_type "processed_transcript"; gene_status "NOVEL"; gene_name "AC098820.3"; transcript_type "antisense"; transcript_status "KNOWN"; transcript_name "AC098820.3-003"; level 1; tag "basic"; tag "exp_conf"; havana_gene "OTTHUMG00000154850.1"; havana_transcript "OTTHUMT00000337362.1";	ENST00000438978.1		Antisense	ENSEMBL	750
RNA147216|p0320_imsncRNA706	0.346721	0.00689108	2.1303	down	8.7118	8.45405	9.11601	7.85181	7.57214	7.58475	0	ATGAACAAGATTATCTGGATAGTGGTGGGAAGACATTGAAGGGGTACATTTCCCTGTCTC	RNA147216|p0320_imsncRNA706													unpublished data	NA
p12199	0.346721	0.00679859	2.32778	down	7.55271	8.07099	7.96805	6.78625	6.29402	6.85461	0	AAAGAAAGTGGGGAAGACAACAGATTTGGGAGAAGGAAACTGAGGAGGTTTTCTCCCAGT	ENST00000458180.1	3	+	195634946	195638128	2	195634946,195636735,	195635649,195638128,	ENSG00000224614.1	gene_id "ENSG00000224614.1"; transcript_id "ENST00000458180.1"; gene_type "processed_transcript"; gene_status "PUTATIVE"; gene_name "AC124944.2"; transcript_type "processed_transcript"; transcript_status "PUTATIVE"; transcript_name "AC124944.2-001"; level 2; tag "basic"; havana_gene "OTTHUMG00000155738.1"; havana_transcript "OTTHUMT00000341447.1";	ENST00000458180.1		Antisense	ENSEMBL	2096
p13861	0.346721	0.00289164	2.88025	down	6.16054	5.56242	5.55249	4.1556	4.07121	4.47007	0	GTTTTGTTTAAAGGCAACAAAACGGCTAGTCTGTGACCCATACCAGAGGTGTTAAAACAG	ENST00000502809.1	5	+	123791065	123795791	3	123791065,123791445,123795404,	123791151,123791580,123795791,	ENSG00000248600.1	gene_id "ENSG00000248600.1"; transcript_id "ENST00000502809.1"; gene_type "lincRNA"; gene_status "NOVEL"; gene_name "CTD-2308B18.4"; transcript_type "lincRNA"; transcript_status "KNOWN"; transcript_name "CTD-2308B18.4-001"; level 1; tag "basic"; tag "exp_conf"; havana_gene "OTTHUMG00000163257.1"; havana_transcript "OTTHUMT00000372363.1";	TCONS_00009500;XLOC_004534	CTD-2308B18.4	Intergenic	ENSEMBL	608
p17914	0.346721	0.0173095	2.02873	down	4.51447	4.28123	3.84344	2.8866	3.21288	3.47793	0	CCTGGCACATTTAACTGCTTAGAAGGTACTCTTTAATGTCACCCAATTAAAAAGAACAAA	TCONS_00017683	10	-	5196654	5227150	8	5196654,5199835,5202081,5202773,5203674,5203818,5204815,5226974,	5197952,5200001,5202148,5202852,5203730,5203935,5204983,5227150,	XLOC_008705	Gene_id=XLOC_008705;Gene_name=linc-AKR1C2-2;Transcript_id=TCONS_00017683;Transcript_name=linc-AKR1C2-2;	XLOC_008705		Intergenic	HumanLincRNACatalog	2127
p14326	0.34911	0.0312585	2.15319	down	6.03949	5.47715	5.48291	4.07637	4.54289	5.06088	0	GAGGCAAACTTGGAGATAAAAATATAGTTCCCGTGCTATCCCTTATAAAGATTTAAGAGA	ENST00000447848.1	6	-	136128285	136129604	2	136128285,136128998,	136128456,136129604,	ENSG00000236378.1	gene_id "ENSG00000236378.1"; transcript_id "ENST00000447848.1"; gene_type "lincRNA"; gene_status "NOVEL"; gene_name "RP11-394G3.2"; transcript_type "lincRNA"; transcript_status "KNOWN"; transcript_name "RP11-394G3.2-001"; level 1; tag "basic"; tag "exp_conf"; havana_gene "OTTHUMG00000015637.1"; havana_transcript "OTTHUMT00000042366.1";	ENCODE_861_777;TCONS_00011567;XLOC_005844		Intergenic	ENSEMBL	777
p16250	0.348733	0.0218168	2.38861	down	5.94356	5.46871	5.28029	3.77311	4.41933	4.73161	0	GCATTTTAAATGAGATGTGAAATTTGGACTTTACTACTGCAGACCTTTGGCTATCTAGTC	ENST00000518302.1	8	+	81949198	81953066	3	81949198,81951613,81952994,	81949503,81951781,81953066,	ENSG00000254060.1	gene_id "ENSG00000254060.1"; transcript_id "ENST00000518302.1"; gene_type "lincRNA"; gene_status "NOVEL"; gene_name "RP11-172E10.1"; transcript_type "lincRNA"; transcript_status "KNOWN"; transcript_name "RP11-172E10.1-001"; level 1; tag "basic"; tag "exp_conf"; havana_gene "OTTHUMG00000164593.1"; havana_transcript "OTTHUMT00000379356.1";	ENST00000518302.1		Intergenic	ENSEMBL	545
p40758_v4	0.346721	0.0152498	2.69607	down	5.49485	5.13256	5.14533	3.32889	3.69744	4.45384	0	TGGAAACTGTTTCAGTACCTGACAAGAGAGACCTTCCTACAGGCTAGAAGAGAGGCAAAT	NR_104670.1	5	-	102864134	102877686	5	102864134,102865404,102866017,102876643,102877554,	102864162,102865495,102866109,102876732,102877686,	none					RefSeq	432
p16331	0.346721	0.00591966	2.54578	down	3.96646	4.49861	3.96983	3.03188	2.91572	2.44297	0	TGCTCTCAGGAAAAGGTAGAAAATGTCTCAGATTCCACAAGAAAGATAGAATGTGTGATA	ENST00000521753.1	8	+	112388891	112527565	5	112388891,112392701,112478406,112525275,112527240,	112388939,112392921,112478529,112525364,112527565,	ENSG00000253434.1	gene_id "ENSG00000253434.1"; transcript_id "ENST00000521753.1"; gene_type "processed_transcript"; gene_status "NOVEL"; gene_name "RP11-1101K5.1"; transcript_type "processed_transcript"; transcript_status "KNOWN"; transcript_name "RP11-1101K5.1-003"; level 2; tag "basic"; havana_gene "OTTHUMG00000164883.1"; havana_transcript "OTTHUMT00000380771.1";	ENST00000521753.1		Intergenic	ENSEMBL	805
p22305	0.346721	0.0163799	2.98914	down	5.20414	4.08224	4.29214	2.64899	2.87121	3.31914	0	CATTGTTACTATGACAATGAAAAGGAGAGCAAATGTCCAAACTCTTCTTGGTAAAATTCC	TCONS_00008495	4	-	63316227	63320355	2	63316227,63320309,	63316413,63320355,	XLOC_003967	Gene_id=XLOC_003967;Gene_name=linc-IGFBP7-4;Transcript_id=TCONS_00008495;Transcript_name=linc-IGFBP7-4;	XLOC_003967		Intergenic	HumanLincRNACatalog	232
p20413	0.348944	0.0241417	2.7182	down	3.84625	5.06729	3.94399	3.04579	2.64836	2.83542	0	CTCCTGGCTATGAGAAAAATGATCTCCATGGACTGTCAGAACTCACGAAACAGAAAAAGG	TCONS_00026497	18	-	36472505	36477474	2	36472505,36477386,	36472782,36477474,	XLOC_012823	Gene_id=XLOC_012823;Gene_name=linc-CELF4-2;Transcript_id=TCONS_00026497;Transcript_name=linc-CELF4-2;	XLOC_012823		Intergenic	HumanLincRNACatalog	365
p5642	0.346721	0.00306514	2.59266	down	7.48668	7.25718	7.0886	5.58063	6.20768	5.92086	0	ATATGGAAGCTCAGAATTGTCAACACTCCCTCTGCTTTTCCTTTGTCTTCCCTCAGAACA	ENST00000562681.1	15	+	71634662	71640810	3	71634662,71635021,71640490,	71634844,71635217,71640810,	ENSG00000260586.1	gene_id "ENSG00000260586.1"; transcript_id "ENST00000562681.1"; gene_type "sense_intronic"; gene_status "NOVEL"; gene_name "RP11-592N21.2"; transcript_type "sense_intronic"; transcript_status "KNOWN"; transcript_name "RP11-592N21.2-001"; level 2; tag "basic"; havana_gene "OTTHUMG00000172840.1"; havana_transcript "OTTHUMT00000420820.1";	ENST00000562681.1		Sense	ENSEMBL	698
p10100	0.34911	0.0323837	3.14879	down	4.31859	5.02897	4.35867	2.69372	2.25053	3.79758	0	CAACAGATTCAGAGAACCTTGAAGTTGATTATGATTTTAAGAATAACAGAGGAGCCAAGA	ENST00000442316.1	2	+	168149680	168414843	3	168149680,168346686,168414646,	168149844,168346787,168414843,	ENSG00000228222.1	gene_id "ENSG00000228222.1"; transcript_id "ENST00000442316.1"; gene_type "lincRNA"; gene_status "NOVEL"; gene_name "AC074363.1"; transcript_type "lincRNA"; transcript_status "KNOWN"; transcript_name "AC074363.1-001"; level 2; tag "basic"; havana_gene "OTTHUMG00000154028.1"; havana_transcript "OTTHUMT00000333555.1";	TCONS_00003044;XLOC_001742		Intergenic	ENSEMBL	462
p27637	0.346721	0.00796265	2.28946	down	5.58583	5.3167	5.02072	3.75532	4.25027	4.33263	0	GGCAGTTGTTCAAAACTCAAGAATGGCTTAAAGGGACTTGTAGATTAATCTGCTTTATTA	uc.182+	5	+	170703078	170703317	1	170703078,	170703317,	uc.182+	uc.182+	UCRs_250_239		Intronic	UCR	239
p42943_v4	0.348733	0.021751	2.96073	down	7.23718	6.44463	7.21495	4.95198	5.17859	6.06832	0	GTGGAGTGAAAAGAAATTATCACAGAATTCCAACAAGGCTTGAAGGCAGAATTATCTTTA	XR_429489.1	15	-	24585943	24587736	3	24585943,24586777,24587714,	24586037,24586842,24587736,	none					RefSeq	181
p37932_v4	0.346721	0.0174694	3.58317	down	6.56693	6.13232	5.8112	3.68281	4.19364	5.11029	0	TTTTCATGGGGTTGCATAAGACAAAGGTGAATTGTTCTCAGAATCATACCAAATGACAAG	ENST00000606686.1	6	-	147269663	147272295	2	147269663,147271364,	147270876,147272295,	ENSG00000272397.1	gene_id "ENSG00000272397.1"; transcript_id "ENST00000606686.1"; gene_type "lincRNA"; gene_status "NOVEL"; gene_name "RP11-497D6.5"; transcript_type "lincRNA"; transcript_status "KNOWN"; transcript_name "RP11-497D6.5-001"; level 2; tag "basic"; havana_gene "OTTHUMG00000185358.1"; havana_transcript "OTTHUMT00000470316.1";			Intergenic	ENSEMBL	2144
p18966	0.328765	6.91007e-05	2.40172	down	3.46215	3.42021	3.53233	2.19302	2.32913	2.10033	0	CTCCTACTGGATTCCTGCTAGTGATGGGAGAAAATTATCATTCTATGAAAAGAATATGTC	TCONS_00021248	12	+	126650811	126655885	4	126650811,126651224,126651421,126655861,	126651012,126651315,126651509,126655885,	XLOC_009937	Gene_id=XLOC_009937;Gene_name=linc-TMEM132C-12;Transcript_id=TCONS_00021248;Transcript_name=linc-TMEM132C-12;	XLOC_009937		Intergenic	HumanLincRNACatalog	404
p39146_v4	0.346721	0.0126574	2.9242	down	4.30446	5.0738	4.90212	3.3203	2.69197	3.62398	0	GCAACTCAGTATGTTGACTTTATTTCCTGAGAGAGAAACAGAGAGAAGAAAAGAAAGAGG	ENST00000436019.2	X	-	27146921	27194415	6	27146921,27177021,27180537,27187152,27187983,27194357,	27147000,27177213,27180693,27187257,27188066,27194415,	ENSG00000242021.2	gene_id "ENSG00000242021.2"; transcript_id "ENST00000436019.2"; gene_type "lincRNA"; gene_status "NOVEL"; gene_name "RP11-268G12.3"; transcript_type "lincRNA"; transcript_status "KNOWN"; transcript_name "RP11-268G12.3-001"; level 2; tag "basic"; havana_gene "OTTHUMG00000021297.2"; havana_transcript "OTTHUMT00000056135.2";			Intergenic	ENSEMBL	673
p19419	0.346721	0.00463737	2.90695	down	3.72683	3.5589	2.89115	1.71173	1.83747	2.00917	0	CGCAAGCCTGTTTCAAGTAATTCCAATATCTGGCTCTTAGAAATTGAACTGATCTTTTTT	TCONS_00022446	14	+	27278585	27289851	4	27278585,27281438,27286125,27289363,	27278646,27281602,27286252,27289851,	XLOC_010778	Gene_id=XLOC_010778;Gene_name=linc-FOXG1-3;Transcript_id=TCONS_00022446;Transcript_name=linc-FOXG1-3;	XLOC_010778		Intergenic	HumanLincRNACatalog	840
p2729	0.346721	0.00515946	3.27695	down	4.25429	4.34406	3.86144	1.99126	2.40469	2.92677	0	ATACTTCTCTGAGTTGGAAATTGGTTAAATTTAGTGATGTTTGAGCCTCAGCTTACATTG	ENST00000533575.1	11	+	38668025	38695791	4	38668025,38669973,38685411,38695632,	38668144,38670154,38685533,38695791,	ENSG00000254562.1	gene_id "ENSG00000254562.1"; transcript_id "ENST00000533575.1"; gene_type "lincRNA"; gene_status "NOVEL"; gene_name "RP11-64I17.1"; transcript_type "lincRNA"; transcript_status "KNOWN"; transcript_name "RP11-64I17.1-001"; level 2; tag "basic"; havana_gene "OTTHUMG00000166467.1"; havana_transcript "OTTHUMT00000389879.1";	ENST00000533575.1		Intergenic	ENSEMBL	581
p7902	0.34911	0.0309749	2.17534	down	5.5238	4.41838	5.04214	3.83018	3.68188	4.10855	0	CAAAGGCCCTCAATGGACCCATACTATAAGTACTGAAAAGTAATGGTTGAAACTCTAGGC	ENST00000584321.1	18	+	10893614	10908781	2	10893614,10908333,	10893672,10908781,	ENSG00000263952.1	gene_id "ENSG00000263952.1"; transcript_id "ENST00000584321.1"; gene_type "antisense"; gene_status "NOVEL"; gene_name "RP11-513M1.1"; transcript_type "antisense"; transcript_status "KNOWN"; transcript_name "RP11-513M1.1-002"; level 2; tag "basic"; havana_gene "OTTHUMG00000178501.1"; havana_transcript "OTTHUMT00000442234.1";	ENST00000584321.1		Antisense	ENSEMBL	506
p5595	0.346721	0.0112667	2.04797	down	7.36192	7.45095	7.31882	6.1649	6.06624	6.79798	0	TTAATCTTCCAAATTGTTGGGGTATTTCATATGAAGTAGCCCCTACCCCCACCTTGTCCT	ENST00000558140.1	15	+	60771418	60822088	5	60771418,60780722,60802606,60820778,60821740,	60771597,60780790,60802732,60820926,60822088,	ENSG00000245534.2	gene_id "ENSG00000245534.2"; transcript_id "ENST00000558140.1"; gene_type "antisense"; gene_status "NOVEL"; gene_name "RP11-219B17.1"; transcript_type "antisense"; transcript_status "KNOWN"; transcript_name "RP11-219B17.1-004"; level 2; tag "basic"; havana_gene "OTTHUMG00000172103.1"; havana_transcript "OTTHUMT00000416839.1";	ENST00000558140.1		Antisense	ENSEMBL	869
p40721_v4	0.346721	0.0139846	2.34592	down	4.46993	3.5897	3.96469	2.48261	2.92012	2.93112	0	GGGTGAAAAACAAAAAATTGTTCTGCATAGAGTCTTCTTTAATGTCTCACTTTGGTGATG	NR_109941.1	5	+	88179146	88328196	4	88179146,88201025,88201518,88327574,	88179302,88201087,88201590,88328196,	none					RefSeq	912
p8970	0.346721	0.0109954	2.164	down	6.75681	6.15634	6.46988	5.06424	5.30135	5.67634	0	CCAGAAGAAGGAGCTTGCATTGTCTTTATTTTGATTTTGTTTTGGTGGAATTGAGAATAC	ENST00000588330.1	2	-	6775965	6789461	6	6775965,6778222,6778409,6778848,6779182,6789342,	6776376,6778285,6778493,6778999,6779409,6789461,	ENSG00000236172.2	gene_id "ENSG00000236172.2"; transcript_id "ENST00000588330.1"; gene_type "lincRNA"; gene_status "NOVEL"; gene_name "AC097517.2"; transcript_type "lincRNA"; transcript_status "KNOWN"; transcript_name "AC097517.2-023"; level 2; tag "RNA_Seq_supported_only"; havana_gene "OTTHUMG00000151631.3"; havana_transcript "OTTHUMT00000459439.1";	TCONS_00003178;XLOC_001964;TCONS_00003179;XLOC_001964;TCONS_00003180;XLOC_001964;TCONS_00003181;XLOC_001964		Intergenic	ENSEMBL	1055
p17999	0.35077	0.0397638	2.22205	down	7.69853	7.16477	6.48294	5.91501	5.72712	6.24844	0	AAGAAAAAGTGGATGAGGAAGACCCTTTGGACATCGTCAAAAGAGGCATTGTTAGCAAAT	TCONS_00018604	10	-	115244763	115252063	2	115244763,115251751,	115245376,115252063,	XLOC_008955	Gene_id=XLOC_008955;Gene_name=linc-ZDHHC6-2;Transcript_id=TCONS_00018604;Transcript_name=linc-ZDHHC6-2;	XLOC_008955		Intergenic	HumanLincRNACatalog	925
p30247	0.351397	0.0417405	3.52931	down	8.49824	7.86846	8.26827	5.4897	6.19216	7.49496	0	GCACTGCACATATACACTTTAAATTGGTGCCTTGGGGAACCACTTCGGTATTTCTTTTTT	uc004acr.1	9	-	42995102	43001391	2	42995102,43000593,	42996555,43001391,	AK094644	proteinID=;alignID=uc004acr.1;kgID=uc004acr.1;mRNA=AK094644;spID=;refseq=;protAcc=;description=Homo sapiens cDNA FLJ37325 fis, clone BRAMY2018295.;rfamAcc=;tRnaName=;	UCSC_4018_2251		Intergenic	UCSC	2251
p8889	0.346721	0.00428583	2.49468	down	8.65623	8.92431	8.28968	7.39254	7.0468	7.47432	0	GGCACGGCCTTTGATTCTGTTTTCTGTAAATCGACGACAATAAATTCTCTTTTTCCTTCA	ENST00000596379.1	19	+	58911587	58912046	1	58911587,	58912046,	ENSG00000268307.1	gene_id "ENSG00000268307.1"; transcript_id "ENST00000596379.1"; gene_type "lincRNA"; gene_status "NOVEL"; gene_name "CTD-2619J13.13"; transcript_type "lincRNA"; transcript_status "KNOWN"; transcript_name "CTD-2619J13.13-001"; level 2; tag "basic"; havana_gene "OTTHUMG00000183532.1"; havana_transcript "OTTHUMT00000467019.1";	ENST00000596379.1	CTD-2619J13.13	Intergenic	ENSEMBL	459
p22211	0.350328	0.0344859	2.17808	down	4.50579	3.97416	4.74507	2.87476	3.17586	3.80523	0	GGATTAACTTTCCTTTTCATGCTTAGGCAATACAAAGTTGAATCACCACTTTAAACCACA	TCONS_00006322	3	+	180585946	180589258	2	180585946,180587855,	180586083,180589258,	XLOC_002938	Gene_id=XLOC_002938;Gene_name=linc-FXR1-1;Transcript_id=TCONS_00006322;Transcript_name=linc-FXR1-1;	XLOC_002938		Intergenic	HumanLincRNACatalog	1540
p29980	0.346721	0.00315464	5.49445	down	7.60559	6.92685	6.94741	4.88297	4.08597	5.13698	0	TACATAGATTCACGGCTCATGGCAATGTTTCATTAAGACAGTTCTTGATGGCCGCTCCAC	TCONS_00014511	8	-	12623571	12668910	5	12623571,12625238,12635762,12645840,12668888,	12624104,12625423,12635865,12645953,12668910,	XLOC_007009	Gene_id=XLOC_007009;Gene_name=linc-LONRF1-1;Transcript_id=TCONS_00014511;Transcript_name=linc-LONRF1-1;	XLOC_007009		Intergenic	HumanLincRNACatalog	956
RNA147607|p0711_imsncRNA483	0.346721	0.0132106	3.12874	down	3.23309	4.11469	3.46285	2.29908	2.18033	1.39446	0	CTAAAACCCTGCAAGGGTTGCATGCAAAGCAAAAAGACTGTGTTCTAGGAATAAGGGCCA	RNA147607|p0711_imsncRNA483													unpublished data	NA
p15300	0.354588	0.0479466	2.50341	down	5.23011	4.94394	5.48951	3.60991	3.31578	4.76619	0	TTTATTGGTGAGTATGATCCCAAAGAGGAGTAGGGTTGTAAACCAGGAAAGACGGGTAAG	ENST00000444500.2	7	+	28279502	28283536	2	28279502,28280075,	28279725,28283536,	ENSG00000234336.2	gene_id "ENSG00000234336.2"; transcript_id "ENST00000444500.2"; gene_type "antisense"; gene_status "NOVEL"; gene_name "JAZF1-AS1"; transcript_type "antisense"; transcript_status "KNOWN"; transcript_name "JAZF1-AS1-003"; level 2; tag "basic"; havana_gene "OTTHUMG00000152771.2"; havana_transcript "OTTHUMT00000327760.2";	ENST00000444500.2	JAZF1-AS1	Antisense	ENSEMBL	3684
p4191	0.35359	0.0450848	2.01141	down	5.87137	5.47471	5.50432	4.37011	4.20193	5.25374	0	TGCTTTTTTGTCCCTGTTTTTGGATTTTCCACCATGATCAGCCAATGCAGAAAGAAATCT	ENST00000585327.1	13	+	44482849	44600977	4	44482849,44516558,44596610,44600958,	44482912,44516749,44596804,44600977,	ENSG00000233725.2	gene_id "ENSG00000233725.2"; transcript_id "ENST00000585327.1"; gene_type "lincRNA"; gene_status "NOVEL"; gene_name "LINC00284"; transcript_type "lincRNA"; transcript_status "KNOWN"; transcript_name "LINC00284-006"; level 2; havana_gene "OTTHUMG00000016827.4"; havana_transcript "OTTHUMT00000459405.1";	TCONS_00021543;XLOC_010368	LINC00284	Intergenic	ENSEMBL	467
p26821	0.346721	0.0126391	2.59028	down	3.79822	3.42358	3.71816	1.86262	2.1045	2.85351	0	ACTGGAGATAAATAGATTTATAGGTGACCAAGACAATCGATTAATGTATCAGCCACAGAC	HIT000090184	4	+	187187125	187187915	1	187187125,	187187915,	HIX0031358	None	H-InvDB_178_818		Antisense	H-InvDB	790
p25620	0.346721	0.00639101	2.22048	down	5.38344	5.98197	6.02673	4.67995	4.50523	4.75434	0	AGGAAGCTCTTGCCCAAAAACATGAGGAGTCAGCAGAAGAGAAGTCACATTTCCTTTTTT	XR_109781.1	X	-	115944898	115951828	2	115944898,115951595,	115945317,115951828,	LOC100126447	ID=rna43990;Name=XR_109781.1;Parent=gene36364;Dbxref=GeneID:100126447,Genbank:XR_109781.1;gbkey=misc_RNA;product=uncharacterized LOC100126447;transcript_id=XR_109781.1|ID=gene36364;Name=LOC100126447;Dbxref=GeneID:100126447;gbkey=Gene;gene=LOC100126447	XR_109781.1		Intergenic	RefSeq	652
p20483	0.347686	0.0199866	2.38526	down	5.68986	6.80659	6.13121	4.80969	4.96637	5.08915	0	TTGAAGTTGAAGACCTAAAAATGTGTCACTGACCTCATGGAAGTAGATATTCACTAGGTG	TCONS_00026224	18	+	12251	16882	3	12251,13151,15616,	12383,13354,16882,	XLOC_012598	Gene_id=XLOC_012598;Gene_name=linc-USP14-3;Transcript_id=TCONS_00026224;Transcript_name=linc-USP14-3;	XLOC_012598		Intergenic	HumanLincRNACatalog	1601
p20498	0.34911	0.0314515	2.00803	down	4.22497	3.80328	4.54785	2.92039	3.62796	3.0104	0	GAACAAAATTGCTCATAACTAAATATGATAATGCAGAAAGTATCCAAGACTCGCCAGTTC	TCONS_00026269	18	+	5847052	5851746	2	5847052,5850900,	5847451,5851746,	XLOC_012617	Gene_id=XLOC_012617;Gene_name=linc-ARHGAP28-3;Transcript_id=TCONS_00026269;Transcript_name=linc-ARHGAP28-3;	XLOC_012617		Intergenic	HumanLincRNACatalog	1245
p5598	0.346721	0.00179628	2.64969	down	6.86464	7.3194	6.9319	5.50294	5.50819	5.88734	0	TTTGATGGAAGACAGCATGAGACGGAGAACCAAGTTCCTTAAAGTACGGAAGTGAACTGT	ENST00000561413.1	15	+	60973825	60979057	3	60973825,60974557,60978925,	60974194,60974632,60979057,	ENSG00000259482.1	gene_id "ENSG00000259482.1"; transcript_id "ENST00000561413.1"; gene_type "antisense"; gene_status "NOVEL"; gene_name "RP11-219B17.2"; transcript_type "antisense"; transcript_status "KNOWN"; transcript_name "RP11-219B17.2-002"; level 2; tag "basic"; havana_gene "OTTHUMG00000172106.1"; havana_transcript "OTTHUMT00000416855.1";	ENST00000561413.1		Antisense	ENSEMBL	576
p12624	0.35077	0.0387508	2.27424	down	4.7162	4.48451	4.89474	2.80759	3.65777	4.07394	0	CTGGATTCCCTTATCATAAAGCATCTTACAGTAACCTCAGAAATGCAGAAGTTACTTGTA	ENST00000505386.1	4	+	12225105	12252910	4	12225105,12244675,12248558,12252610,	12225252,12244802,12248594,12252910,	ENSG00000251210.1	gene_id "ENSG00000251210.1"; transcript_id "ENST00000505386.1"; gene_type "lincRNA"; gene_status "NOVEL"; gene_name "RP11-168E17.1"; transcript_type "lincRNA"; transcript_status "KNOWN"; transcript_name "RP11-168E17.1-001"; level 1; tag "basic"; tag "exp_conf"; havana_gene "OTTHUMG00000160074.2"; havana_transcript "OTTHUMT00000359107.1";	ENST00000505386.1		Intergenic	ENSEMBL	610
p22474	0.350581	0.0372604	3.35829	down	4.51944	4.94796	4.73919	2.43228	2.43228	4.09883	0	ACTAGTACATCAGAAAATTCAGCAATCCAGAATTCCGGTTTTTCAGAAAAGGGCAAGAGC	TCONS_00008023	4	+	27904204	27995255	3	27904204,27932802,27995110,	27904228,27932960,27995255,	XLOC_003486	Gene_id=XLOC_003486;Gene_name=linc-PCDH7-7;Transcript_id=TCONS_00008023;Transcript_name=linc-PCDH7-7;	XLOC_003486		Intergenic	HumanLincRNACatalog	327
p20521	0.346721	0.0101348	2.2352	down	2.51954	2.97605	2.74054	1.66927	1.9097	1.17594	0	TTTGGGAACTGTCAGAAATGACAGGAGAGATACAAGAAGGTCAACGTCTGGAAATCCGAC	TCONS_00026298	18	+	22069209	22070990	2	22069209,22070613,	22069366,22070990,	XLOC_012642	Gene_id=XLOC_012642;Gene_name=linc-PSMA8-5;Transcript_id=TCONS_00026298;Transcript_name=linc-PSMA8-5;	XLOC_012642		Intergenic	HumanLincRNACatalog	534
p4010	0.346721	0.00813354	2.29025	down	7.05375	6.90497	6.91693	5.34596	5.76567	6.1775	0	AGTGGAAGGGATAAAAATGTAATGGAATTGCAGAGTTGTTGGCATTCAGATGTGTAGGTG	ENST00000454681.2	13	-	33929342	34250905	6	33929342,33933601,33957768,34013827,34098374,34250814,	33929803,33933724,33957816,34013861,34098509,34250905,	ENSG00000230490.2	gene_id "ENSG00000230490.2"; transcript_id "ENST00000454681.2"; gene_type "lincRNA"; gene_status "NOVEL"; gene_name "RP11-141M1.3"; transcript_type "lincRNA"; transcript_status "KNOWN"; transcript_name "RP11-141M1.3-001"; level 2; tag "basic"; havana_gene "OTTHUMG00000016714.2"; havana_transcript "OTTHUMT00000044447.2";	ENST00000454681.2		Intergenic	ENSEMBL	892
p22657	0.354588	0.0479586	2.61757	down	8.23847	8.33927	8.80361	6.90996	6.36735	7.93935	0	ATTTGTAGGGAAGACAATGTGCACCCATCGGAGCTCTGATTCCTTTACTTTCACTACCCT	TCONS_00010226	5	-	26321	37720	2	26321,37544,	26527,37720,	XLOC_004691	Gene_id=XLOC_004691;Gene_name=linc-TRIM52-1;Transcript_id=TCONS_00010226;Transcript_name=linc-TRIM52-1;	XLOC_004691		Intergenic	HumanLincRNACatalog	382
p35877_v4	0.351397	0.0418078	3.28109	down	11.7989	10.7857	11.4728	8.94171	9.37108	10.6021	0	CTGACTGAAACCTGAGTTTTGATTCACCAGGTTGGAAACACTCTTTTTGTAGAATGTATG	TCONS_00027261	19	-	28214352	28284685	6	28214352,28218724,28223703,28237005,28283907,28284439,	28214775,28218887,28223875,28237248,28284140,28284685,	XLOC_013282	Gene_id=XLOC_013282;Gene_name=linc-ZNF681-4;Transcript_id=TCONS_00027261;Transcript_name=linc-ZNF681-4;	XLOC_013282		Intergenic	HumanLincRNACatalog	1480
p3764	0.346721	0.0128362	2.26752	down	6.23335	6.51975	6.63055	4.89055	5.20558	5.74417	0	TGTCTGTTCACCCATGAAAGAAGAGGAAGACACCAAATGGATGGCATTGATTTCATTTTA	ENST00000552230.1	12	+	78746298	78876799	3	78746298,78871172,78876564,	78746460,78871269,78876799,	ENSG00000258084.1	gene_id "ENSG00000258084.1"; transcript_id "ENST00000552230.1"; gene_type "processed_transcript"; gene_status "NOVEL"; gene_name "RP11-754N21.1"; transcript_type "processed_transcript"; transcript_status "PUTATIVE"; transcript_name "RP11-754N21.1-002"; level 2; havana_gene "OTTHUMG00000170009.1"; havana_transcript "OTTHUMT00000406849.1";	ENST00000552230.1		Intergenic	ENSEMBL	494
p34285_v4	0.350581	0.0377294	2.26385	down	9.79749	9.86735	10.6201	8.80936	8.49088	9.44833	0	TTGCCTCTGCTGGAAGACTGACGGAGCCAGGGCTCTGCCTGCCACAATTCATGAGCTGGC	ENST00000542632.1	13	-	41032670	41040785	3	41032670,41034418,41040643,	41032805,41034543,41040785,	ENSG00000215483.4	gene_id "ENSG00000215483.4"; transcript_id "ENST00000542632.1"; gene_type "lincRNA"; gene_status "NOVEL"; gene_name "LINC00598"; transcript_type "lincRNA"; transcript_status "KNOWN"; transcript_name "LINC00598-201"; level 3; havana_gene "OTTHUMG00000016772.1";	ENST00000542632.1	LINC00598	Intergenic	ENSEMBL	402
p10225	0.349241	0.0336518	2.20112	down	9.03565	8.91358	8.88756	7.46823	7.43588	8.51796	0	CCATATGAGCACACAGGAAGAAGACTGCCATCTGCAAATCAGGAAGACAATCATCATCAA	ENST00000438824.1	2	+	208125168	208135414	3	208125168,208133424,208135207,	208125291,208133617,208135414,	ENSG00000225064.1	gene_id "ENSG00000225064.1"; transcript_id "ENST00000438824.1"; gene_type "lincRNA"; gene_status "NOVEL"; gene_name "AC007879.6"; transcript_type "lincRNA"; transcript_status "KNOWN"; transcript_name "AC007879.6-001"; level 1; tag "basic"; tag "exp_conf"; havana_gene "OTTHUMG00000154784.1"; havana_transcript "OTTHUMT00000337042.1";	ENST00000438824.1		Intergenic	ENSEMBL	523
p643	0.34911	0.0288686	2.6868	down	4.04074	3.9657	3.18527	1.65471	2.70647	2.55286	0	CAGTCCTCTCTCTATCCTTACTCACATGAAAATGCAATGGTTCGATTTGTAAAGGTAAAT	ENST00000446002.1	1	-	219086098	219089526	3	219086098,219088576,219089479,	219086357,219088660,219089526,	ENSG00000225561.1	gene_id "ENSG00000225561.1"; transcript_id "ENST00000446002.1"; gene_type "lincRNA"; gene_status "NOVEL"; gene_name "RP11-412H9.2"; transcript_type "lincRNA"; transcript_status "KNOWN"; transcript_name "RP11-412H9.2-001"; level 2; tag "basic"; havana_gene "OTTHUMG00000041229.1"; havana_transcript "OTTHUMT00000098810.1";	ENCODE_2451_390;TCONS_00000731;XLOC_001204		Intergenic	ENSEMBL	390
p11222	0.348944	0.026208	2.36429	down	8.6155	9.06447	9.72223	7.89643	7.60789	8.17365	0	TTACGTGTTAAATACAGGGAATGGCTTTTGCATTGATATAACCCCAGCCTCCAGCATGCG	ENST00000602478.1	22	+	43011249	43011913	1	43011249,	43011913,	ENSG00000270022.1	gene_id "ENSG00000270022.1"; transcript_id "ENST00000602478.1"; gene_type "lincRNA"; gene_status "KNOWN"; gene_name "RNU12"; transcript_type "lincRNA"; transcript_status "KNOWN"; transcript_name "RNU12-001"; level 2; tag "basic"; havana_gene "OTTHUMG00000183993.1"; havana_transcript "OTTHUMT00000467709.1";	ENST00000602478.1	RNU12	Intergenic	ENSEMBL	664
p12699	0.346721	0.00705414	2.06458	down	5.0169	4.33687	4.65207	3.53797	3.58982	3.74051	0	AATGAGGCTGTTACTCTAACTCAAAGCAGACTTGCAAGAGTAAAATAATCAATCTTCATC	ENST00000507388.1	4	+	43342891	43347617	5	43342891,43344197,43344609,43344841,43347394,	43342965,43344270,43344691,43345042,43347617,	ENSG00000250657.1	gene_id "ENSG00000250657.1"; transcript_id "ENST00000507388.1"; gene_type "processed_transcript"; gene_status "NOVEL"; gene_name "RP11-1E6.1"; transcript_type "lincRNA"; transcript_status "KNOWN"; transcript_name "RP11-1E6.1-001"; level 2; tag "basic"; havana_gene "OTTHUMG00000160433.2"; havana_transcript "OTTHUMT00000360574.2";	TCONS_00007523;XLOC_003526		Intergenic	ENSEMBL	653
[truncated: 36,152 more rows]

## Sheet: List of DE mRNA
Table SI Microarray analysis of DE lncRNA and mRNA
[truncated: 32,554 more rows]
